# Supplementary material for: Aberrant RBMX expression is relevant for cancer prognosis and immunotherapy response
Source: Aging (Albany NY). 2024 Jan 11;16(1):226–45. doi: 10.18632/aging.205363 (PMC10817375; doi:10.18632/aging.205363)
Supplement: Supplementary Table 2 [file aging-16-205363-s002.xlsx]

## Sheet: ACC
Supplementary Table 2. Differential expressed genes between low- and high RBMX expression in each cancer type.
id	fc	log2fc	padj
TAP1	4.72886	2.24149	2.15407e-10
PSMB9	5.95472	2.57403	1.73889e-09
PSMB8	3.48715	1.80205	1.11929e-05
NFKBIE	2.37309	1.24677	0.000145282
HLA-DMA	4.08538	2.03047	0.000634091
TMPRSS13	4.18838	2.06639	0.000814167
HLA-C	3.47483	1.79694	0.00100928
HLA-B	4.07475	2.02671	0.00145082
TRIM21	2.07969	1.05637	0.00184698
TAP2	2.5621	1.35732	0.00207968
LARP4B	0.619558	-0.69069	0.00211658
HMX3	0.0960792	-3.37963	0.00263533
CASP10	2.8743	1.52321	0.00294216
HSPC157	2.09754	1.0687	0.00294216
RNASE1	4.56603	2.19094	0.00294216
CD209	9.6767	3.27452	0.00294216
DOK2	4.90363	2.29385	0.00299751
P2RY6	5.3397	2.41676	0.00320977
SP140	3.15041	1.65554	0.00320977
B2M	3.06596	1.61634	0.00321037
IFI16	2.45422	1.29526	0.00403047
HLA-H	3.19792	1.67714	0.00456495
BATF2	3.26054	1.70511	0.00456495
FAM119A	1.81775	0.862153	0.00456495
HLA-F	3.57272	1.83702	0.00456495
APOL1	3.92573	1.97296	0.00456495
S100A9	7.94623	2.99027	0.00456495
IRGQ	0.581151	-0.783015	0.00464631
DTNBP1	1.58297	0.662637	0.00464631
CD52	4.27195	2.09489	0.00476585
SRF	1.62009	0.696075	0.00476585
TNPO2	0.589464	-0.762524	0.00476585
CCRL2	3.85736	1.94761	0.00477001
BCL2A1	5.37691	2.42678	0.00477001
VNN2	7.646	2.93471	0.00477001
RNF144B	2.92197	1.54694	0.00477001
MAD2L1BP	1.58408	0.663649	0.00490899
LOC100188949	2.93078	1.55128	0.00490899
GBP1	3.79464	1.92396	0.00499496
UBD	6.8224	2.77028	0.00564963
CASP1	4.83264	2.27281	0.00564963
FCRLA	5.3711	2.42522	0.00564963
SCLY	1.74495	0.803188	0.00648069
DUT	1.60857	0.685782	0.00665989
KLRK1	4.55663	2.18797	0.0069443
KYNU	5.91252	2.56377	0.00732058
C1orf125	0.230356	-2.11806	0.00732058
IGFBP1	5.43209	2.44151	0.00732058
HLA-DMB	3.42439	1.77585	0.00747277
MYST4	0.576304	-0.795099	0.00747277
MGC72080	2.10492	1.07377	0.00747277
CCL23	3.87173	1.95298	0.00747277
KHK	4.7547	2.24935	0.00780855
GIMAP1	2.75859	1.46393	0.00828877
BATF	4.71013	2.23577	0.00828877
C1orf127	2.43016	1.28105	0.00833111
AIM1	3.87506	1.95422	0.0084295
MOBKL2C	1.76205	0.817253	0.0084295
C15orf40	1.64834	0.721015	0.0084295
HCP5	5.3003	2.40608	0.0084295
NRP2	4.23529	2.08246	0.0084295
LSM2	1.83339	0.874517	0.0084295
APP	0.568952	-0.813622	0.0084295
GIMAP2	2.69669	1.43119	0.0084295
ATXN2	0.670935	-0.575755	0.0084295
SLC44A5	0.0985773	-3.3426	0.0084295
SNAP91	0.103158	-3.27707	0.00864153
MEGF10	0.0773097	-3.69321	0.00881682
SIGLEC1	5.73662	2.5202	0.00881682
NCF4	4.62976	2.21094	0.00884963
ARAP1	1.69087	0.757767	0.00884963
DIP2C	0.437757	-1.1918	0.00894834
PGA3	3.07098	1.6187	0.00947602
ZFP28	0.494653	-1.01551	0.0097685
SIGLEC7	3.75838	1.91011	0.00979303
KLRC3	3.6804	1.87986	0.010493
CCL8	6.09382	2.60735	0.010493
HCG26	5.19075	2.37594	0.010493
MS4A4A	4.56555	2.19079	0.010493
LRG1	6.81659	2.76905	0.0107585
SEC24C	0.771448	-0.374359	0.0107585
ATN1	0.600554	-0.735635	0.010915
GPBAR1	2.84358	1.50771	0.010915
NAALADL1	2.52651	1.33715	0.0109265
TMEM150B	3.87383	1.95376	0.0109265
SFRS14	0.604381	-0.726471	0.0109276
NOD1	2.32419	1.21673	0.0109276
BTG2	2.50913	1.32719	0.0109491
LY9	3.80525	1.92799	0.0109491
SLC15A3	3.11652	1.63994	0.0109491
SLAMF8	3.75211	1.9077	0.0109491
BRSK2	0.157857	-2.66331	0.0109491
TNFRSF1B	2.87179	1.52195	0.0109491
GBP2	4.99425	2.32027	0.0109491
ACHE	0.150837	-2.72894	0.0111253
LOC150197	1.81989	0.863852	0.0111253
FES	2.89758	1.53485	0.0111253
SLC43A3	2.94062	1.55612	0.0111253
LILRA6	3.71194	1.89217	0.0111253
SECTM1	4.54963	2.18575	0.0111421
KIAA0913	0.632279	-0.661367	0.0113272
SPIN1	0.650279	-0.620869	0.0114612
C2orf44	1.44392	0.529993	0.0114612
CCR1	4.12665	2.04497	0.0114612
BDNF	0.161909	-2.62675	0.0114612
AFF4	0.536389	-0.898649	0.0114612
FCGRT	2.62899	1.39451	0.0115997
CNDP2	1.64606	0.719017	0.0116291
FGG	46.4589	5.53788	0.0116291
IFI35	2.37539	1.24816	0.0116291
F13A1	9.59393	3.26212	0.0116291
C2	5.62718	2.49241	0.0116291
UBE2L6	2.01886	1.01354	0.0116342
GNA15	4.10052	2.03581	0.0116342
ZDHHC18	1.77116	0.824695	0.0118605
KLRC2	4.67355	2.22452	0.0119317
HLA-G	4.39567	2.13608	0.0126192
GMFG	2.7575	1.46336	0.0126192
RASGRP4	3.60987	1.85195	0.0134487
CARD16	4.00778	2.0028	0.0134553
SLC7A7	2.67039	1.41705	0.0139428
STYX	1.52796	0.611605	0.0144153
CCDC153	2.44688	1.29094	0.014638
RHBDF2	2.41646	1.27289	0.014638
CRAMP1L	0.620946	-0.687461	0.014638
FAM167B	2.23587	1.16083	0.014638
C1QA	4.41835	2.14351	0.014638
CACNA2D4	3.07535	1.62075	0.0156801
CD180	3.5697	1.8358	0.0159496
HLA-A	2.8373	1.50452	0.0160407
DLG5	0.499076	-1.00267	0.0161275
HSPB11	1.81684	0.861434	0.0161275
TCTN3	0.728377	-0.457243	0.0161275
HLA-E	2.48526	1.31339	0.0161275
SH2D1B	2.54294	1.3465	0.0161275
MRC1	4.35245	2.12183	0.0161275
CASP5	2.6756	1.41986	0.0161275
KCNAB2	2.04598	1.03279	0.0161275
CYTH4	3.14935	1.65505	0.0161275
FERMT3	3.06043	1.61374	0.0161275
CYP27B1	0.353802	-1.49898	0.0161275
SH2B3	1.83454	0.875418	0.0161275
PWWP2B	0.542822	-0.881448	0.0161275
ZNF462	0.470708	-1.0871	0.0161275
COMMD4	1.5847	0.664206	0.0161275
GBF1	0.755483	-0.40453	0.0161275
ACP5	3.91945	1.97065	0.0161951
CCR7	3.97457	1.9908	0.0161951
KCNA4	0.142897	-2.80696	0.0161951
TBC1D10C	3.77723	1.91733	0.0161951
DENND2D	2.06645	1.04715	0.0161951
ADA	2.0344	1.0246	0.0161951
CEP290	0.604311	-0.726636	0.0163065
ZNF827	0.37466	-1.41635	0.0163115
FAM20A	6.40311	2.67877	0.0164368
PPP2R5A	1.4456	0.53167	0.0164368
C1orf38	4.27203	2.09492	0.016489
DAP3	1.54551	0.628082	0.0165519
ASB9	3.4087	1.76922	0.0165519
LBR	1.87849	0.909571	0.0165519
CXCL11	4.79526	2.26161	0.0165519
WAS	3.5929	1.84515	0.016581
CIC	0.628094	-0.670948	0.016581
TRNAU1AP	1.59753	0.675843	0.016581
SLAMF7	4.7741	2.25523	0.0165902
FOLR2	5.30128	2.40634	0.0166341
STX11	3.74649	1.90554	0.0166359
ADAP2	2.94121	1.55641	0.0166359
RHOH	4.37668	2.12984	0.0169641
YIPF1	1.49533	0.580463	0.0169641
SNAPC3	0.622547	-0.683745	0.0172003
LILRA5	3.93046	1.9747	0.0172384
RAC2	5.18386	2.37403	0.0173217
PTPN6	3.18003	1.66904	0.0173217
TMEM218	1.48085	0.566423	0.0173217
NCF1C	4.11114	2.03954	0.0173362
IL2RG	4.4374	2.14971	0.0173362
CTSW	4.4177	2.1433	0.0173626
RAB27A	2.58127	1.36808	0.0174642
FMO3	7.44187	2.89566	0.0174642
C15orf48	5.23444	2.38803	0.0175773
TBPL1	1.53795	0.621009	0.0175773
FGF12	0.120584	-3.05188	0.0175773
AIF1	4.02007	2.00722	0.0175773
SLC26A9	3.66148	1.87243	0.0175773
CHD5	0.188037	-2.41091	0.0175773
CACNA1H	0.223238	-2.16334	0.0175773
MGEA5	0.651094	-0.619062	0.017618
EPSTI1	3.34357	1.74139	0.017621
PLEKHA5	0.534624	-0.903403	0.0177279
LYL1	2.44775	1.29145	0.0177279
CD163	4.55528	2.18754	0.01808
MYO1G	3.47464	1.79687	0.01808
SIRPG	4.11242	2.03999	0.01808
PTPRS	0.340673	-1.55354	0.0183488
APOL3	2.45637	1.29653	0.0183488
CCL4	4.68465	2.22794	0.0188302
SHISA5	1.43516	0.521208	0.0190012
PDCD1LG2	3.6612	1.87231	0.019049
UNG	0.558074	-0.841471	0.019049
IMPA2	2.99192	1.58107	0.019049
YME1L1	0.660376	-0.598641	0.019049
TRIM38	2.47254	1.30599	0.019049
CERKL	3.50259	1.80842	0.019049
DHRS9	4.27793	2.09691	0.019049
RIPK3	2.95703	1.56415	0.0200251
DGKI	0.33209	-1.59035	0.0200798
SPG21	1.45584	0.541853	0.0201673
GIMAP4	2.09711	1.06841	0.0203953
CASKIN1	0.201861	-2.30857	0.0205393
RARRES3	4.54597	2.18459	0.0207812
CLP1	1.46316	0.549091	0.021552
HMX2	0.170174	-2.55492	0.0218111
ACOT7	2.20295	1.13943	0.0218606
S1PR4	2.91521	1.5436	0.0218606
FAM111A	1.71151	0.775266	0.0218606
APOC1	7.67756	2.94065	0.0221069
IL2RA	5.12427	2.35735	0.0221069
IL10	3.88762	1.95889	0.0221069
IDH2	2.48986	1.31606	0.0222679
2022-09-06	0.436719	-1.19522	0.0222679
MRPL11	1.48619	0.571617	0.0222679
PLAU	4.08861	2.03161	0.0222679
PML	1.64747	0.720255	0.0224669
ADNP	0.741915	-0.430674	0.0224758
FRMD4B	2.25068	1.17036	0.022538
SH3BP4	0.497764	-1.00647	0.022538
TCTEX1D1	2.64244	1.40187	0.022538
ZNF628	0.711629	-0.490802	0.022538
C14orf135	0.627975	-0.671221	0.022538
C10orf128	3.21183	1.6834	0.022538
APOBEC3D	3.72002	1.89531	0.022538
HCK	3.47834	1.7984	0.022538
SNF8	1.42949	0.515496	0.0225428
RASSF4	2.53663	1.34291	0.0225428
SYNGAP1	0.532412	-0.909386	0.0226704
GIMAP5	2.38729	1.25537	0.0226704
TRIM26	1.34945	0.432367	0.0228497
CST7	4.23639	2.08284	0.0229292
GPSM3	2.88434	1.52824	0.0229551
BTN3A3	2.17393	1.12031	0.0229551
JAKMIP3	0.270455	-1.88654	0.0233846
FURIN	1.60549	0.68301	0.0233846
CD247	3.29004	1.7181	0.0234665
CD33	3.85656	1.94731	0.0234665
LCP2	3.02811	1.59842	0.0234665
CD300A	3.24326	1.69744	0.0234665
C1QC	3.78627	1.92078	0.0234665
D4S234E	0.0776744	-3.68642	0.0234665
CD3E	5.30722	2.40796	0.0234665
C1orf54	1.99564	0.996854	0.0234665
FTL	1.96977	0.978025	0.0234665
NFIC	0.420154	-1.25101	0.0234665
RUFY2	0.653443	-0.613867	0.0234665
KIF16B	0.483328	-1.04892	0.0234665
C1QB	3.83793	1.94033	0.0234665
ABCF1	1.45396	0.53999	0.0234665
IRF1	2.53927	1.34441	0.0234665
NCF2	3.42873	1.77767	0.0234665
GBP5	4.98826	2.31854	0.0234665
SATB2	0.562899	-0.829053	0.0234665
SLC9A3	0.188345	-2.40855	0.0234665
AHCTF1	0.59399	-0.751489	0.0234665
HLA-DPB1	3.60016	1.84806	0.0234665
TAPBP	1.52804	0.611682	0.0234665
TSPAN7	0.240199	-2.0577	0.0234665
ZNF333	0.582097	-0.780669	0.0234665
IL15RA	2.56967	1.36159	0.0234665
BAI1	0.0699979	-3.83654	0.0234665
CD48	4.35525	2.12276	0.0234665
TPSG1	0.239786	-2.06018	0.0234665
MAP7D2	0.11109	-3.1702	0.0234665
ZNF776	0.636988	-0.650661	0.0234665
FRMD8	1.9161	0.938173	0.0234665
CNNM1	0.112337	-3.15409	0.0234665
VSIG4	4.29537	2.10278	0.0234665
CD163L1	5.0384	2.33296	0.0234665
SOD2	2.0368	1.0263	0.0236219
NKX3-2	0.191077	-2.38777	0.0236818
KIF3A	0.502674	-0.992305	0.0236818
SV2C	0.248252	-2.01012	0.0236818
PDIA3	1.55374	0.635746	0.0236818
GYPC	3.54326	1.82508	0.0236818
ARHGAP30	2.98512	1.57779	0.0236818
MS4A6A	3.60251	1.849	0.0236818
HLA-DRB6	3.73378	1.90064	0.0236818
CCDC41	0.557202	-0.843726	0.0236818
BCL2L14	1.66793	0.738058	0.0236818
SYTL3	2.40353	1.26515	0.0236818
WDR37	0.590823	-0.759203	0.0236818
CNPY3	1.6781	0.746828	0.0236901
TNKS2	0.712165	-0.489716	0.0236901
SLC44A3	3.53372	1.82119	0.0236901
ACER3	1.80505	0.852043	0.0236901
THOC7	1.36935	0.453493	0.0236901
TBC1D1	1.88892	0.91756	0.0236901
H2AFY2	0.376684	-1.40858	0.0236901
GPC3	4.41467	2.14231	0.0236901
ARHGEF9	0.597883	-0.742066	0.02371
FAM13C	0.282746	-1.82242	0.02371
SELL	3.68411	1.88132	0.023854
PDPR	0.528288	-0.920604	0.0238702
NRG3	0.199797	-2.32339	0.0240034
NDUFB3	1.44763	0.533692	0.0240119
EML6	0.209479	-2.25512	0.0240119
CDC42EP2	2.53603	1.34257	0.0240574
UBE2F	1.42695	0.51293	0.0240917
CCL3	4.83611	2.27385	0.0240917
GLUL	1.97287	0.980293	0.0240917
SHOC2	0.728585	-0.45683	0.0240917
CDCP1	5.56934	2.47751	0.0240917
TCEB3	1.44526	0.531329	0.0240917
SLC35B2	1.51049	0.595014	0.0240917
CD3D	4.75585	2.2497	0.0240917
C7orf47	2.3905	1.25731	0.0240917
PLB1	5.83869	2.54564	0.0240917
FGF9	0.139143	-2.84536	0.0240917
XCL1	3.04851	1.60811	0.0240917
NMI	1.5766	0.656814	0.0240917
CHD6	0.669876	-0.578034	0.0240917
PRR5L	2.31063	1.20829	0.0240917
ANO4	0.142939	-2.80653	0.0240917
NCF1	4.06652	2.02379	0.0240917
STAB1	3.14089	1.65117	0.0240917
GZMB	3.92042	1.97101	0.0240917
RHOG	1.62822	0.703294	0.0240917
BCL10	1.50105	0.585975	0.0241479
NCKAP1L	4.24383	2.08537	0.0245164
SYK	3.58104	1.84038	0.0245164
FAIM3	3.45835	1.79009	0.0245164
KCNC4	2.35251	1.2342	0.0245164
ASGR2	2.51809	1.33233	0.0245164
GNGT2	2.41324	1.27097	0.0245376
CRYBB1	3.15609	1.65814	0.0245376
RELL1	1.97426	0.981311	0.0245376
SAC3D1	1.86807	0.90155	0.0245376
PLEK	3.6207	1.85627	0.0245376
STK17B	2.14093	1.09823	0.0247739
S100A8	4.85416	2.27922	0.0247739
CD38	3.84323	1.94232	0.0252167
CD28	4.05652	2.02024	0.0252167
SCML4	3.79423	1.92381	0.0252167
LYN	2.30012	1.20171	0.0252167
TFEB	2.78812	1.47929	0.0253637
SPTBN2	0.329725	-1.60066	0.0259322
UBASH3A	3.45037	1.78675	0.0259322
C20orf117	0.562515	-0.830036	0.0259322
SP140L	1.84411	0.882923	0.0259557
C20orf103	0.109584	-3.1899	0.0259557
STARD5	2.12851	1.08984	0.0260263
HTR3A	1.70552	0.770214	0.0260263
C6orf106	1.55456	0.636508	0.0263782
SPIRE1	0.660061	-0.599328	0.0263782
CXCR6	4.89291	2.29069	0.0263782
PSTPIP1	5.59575	2.48433	0.0263782
PSMA5	1.47287	0.55863	0.0266374
SIT1	3.92263	1.97182	0.0268803
IFITM2	2.44556	1.29016	0.0268803
GRAP2	3.5414	1.82432	0.0268803
LPPR2	0.525884	-0.927185	0.0269503
IL1RN	3.07592	1.62102	0.0270317
FAM135B	0.121538	-3.04052	0.0270317
FCER1G	3.43444	1.78008	0.0270905
GSTA1	29.6023	4.88764	0.0271254
KLRC1	2.52852	1.3383	0.0271254
LOC400759	3.25425	1.70233	0.0271254
CPEB3	0.571672	-0.80674	0.0271254
ST6GALNAC5	0.132432	-2.91668	0.0271254
TRPC2	2.1278	1.08936	0.0271254
LOC283922	0.533924	-0.905295	0.0272177
PTPRCAP	2.76017	1.46476	0.0272177
HK3	3.35856	1.74784	0.0272177
GRM6	0.249256	-2.0043	0.0272177
NOP10	1.52154	0.605533	0.0272177
CARD9	3.38019	1.7571	0.0272177
LCK	3.56597	1.8343	0.0272177
KIF5C	0.182994	-2.45013	0.0272177
LOC144742	0.605311	-0.724251	0.0272177
LPHN1	0.404632	-1.30532	0.0272177
HMOX1	3.10211	1.63325	0.0272515
RCN1	1.67466	0.743865	0.0273439
CYB5B	0.453588	-1.14054	0.0274923
SLC23A2	0.440905	-1.18146	0.0276391
ITGAM	3.86599	1.95084	0.0278095
FPR2	2.92752	1.54968	0.0278162
CNTNAP3	0.248123	-2.01087	0.0278162
MEFV	2.74599	1.45733	0.0278162
ADAMDEC1	4.3602	2.12439	0.0278162
PATL2	3.60408	1.84963	0.0278162
FAM182A	0.529928	-0.916131	0.0278162
ZNF518A	0.564878	-0.823989	0.0278162
MYL12A	1.55279	0.63486	0.0278162
VNN1	4.78837	2.25953	0.0279042
GPN1	1.44899	0.535051	0.0279042
LRRC28	1.54165	0.624474	0.0281673
CLEC4D	1.81886	0.863034	0.028388
CNTN4	0.247801	-2.01275	0.0288001
ADORA3	3.20842	1.68186	0.0288528
MPEG1	3.31866	1.7306	0.028899
PRR4	0.523323	-0.934226	0.028899
IL12A	2.8457	1.50878	0.028899
RNASE6	3.38425	1.75884	0.028928
C17orf87	2.66893	1.41626	0.028928
IL18BP	1.99886	0.999175	0.028928
SERPING1	3.05058	1.60908	0.028928
ERF	0.631673	-0.662749	0.028928
LRRC33	2.46889	1.30386	0.028928
HCST	3.37599	1.75531	0.029058
GGCT	1.52649	0.610217	0.029058
FASLG	3.23832	1.69525	0.029058
MFNG	2.0781	1.05526	0.029058
ARMC7	1.4809	0.566469	0.029058
SCN8A	0.247161	-2.01648	0.029058
KHDRBS2	0.184634	-2.43726	0.029058
POLD3	1.59168	0.670553	0.029058
CXCL9	5.26333	2.39597	0.029058
APOA1BP	1.47161	0.557399	0.029058
UPF0639	0.517406	-0.950631	0.029058
BTN3A1	1.73053	0.791211	0.0292358
ZNF335	0.702203	-0.51004	0.0292358
RORB	0.146706	-2.769	0.0292358
CACNA1D	0.143929	-2.79657	0.0292415
PTCRA	2.08453	1.05972	0.0292503
ZNF768	0.687272	-0.541046	0.0292599
PARP15	2.59381	1.37507	0.0294234
PIK3AP1	3.0162	1.59273	0.0294234
ZNF587	0.637009	-0.650615	0.0294234
TNFAIP8L2	3.1624	1.66102	0.0294234
BIRC3	3.26417	1.70672	0.0294234
SH2D1A	3.74091	1.90339	0.0294234
ARL5B	0.49834	-1.0048	0.0294234
2022-09-10	1.62385	0.699421	0.0294833
MARCO	7.95309	2.99152	0.0295515
RIMBP2	0.110354	-3.17979	0.0295742
FAM35B2	0.72141	-0.471108	0.0295742
ACBD5	0.640855	-0.64193	0.0295742
DLL3	0.200298	-2.31978	0.0295742
TDRD5	0.219216	-2.18958	0.0295742
ZNF791	0.521235	-0.939994	0.0295742
APOL4	3.71855	1.89474	0.0295742
VN1R1	0.437534	-1.19253	0.0297611
SP110	1.72251	0.784509	0.0298903
TFIP11	1.37471	0.459124	0.0298903
AEBP2	0.70001	-0.514553	0.0298903
IL18	3.92651	1.97325	0.0301158
TAS2R10	0.537884	-0.894632	0.0304634
ALDH1L1	0.138266	-2.85448	0.0306016
TMC8	3.15944	1.65967	0.0306449
KCNN2	0.144168	-2.79417	0.0306449
USP35	0.44993	-1.15223	0.0306449
C3orf72	0.167011	-2.58199	0.0306449
IL13RA1	1.77149	0.824967	0.0306449
C11orf17	1.39519	0.480459	0.0307098
HLA-DRA	3.58609	1.84241	0.0307098
TKTL1	2.40648	1.26692	0.0308202
MED12L	0.273936	-1.86809	0.0308264
TBX3	0.226237	-2.14409	0.0309732
RNF40	0.783143	-0.352652	0.0309732
TRAF3IP3	2.8007	1.48579	0.0309732
P2RY10	2.60023	1.37864	0.0311012
WNK2	0.154402	-2.69523	0.0311012
CAMSAP1	0.674438	-0.568242	0.0311012
CD68	3.01674	1.59299	0.0311012
SLC47A1	0.176427	-2.50286	0.0311012
ZNRF2	1.83335	0.874479	0.0311012
IFI30	3.28573	1.71622	0.0311012
2022-03-05	0.719863	-0.474206	0.0311012
ITGB7	3.34746	1.74307	0.0311012
CEBPD	2.33008	1.22038	0.0311012
HMGA1	3.13186	1.64702	0.031122
GJA4	2.33791	1.22522	0.0316851
CCR5	3.90931	1.96691	0.0316851
IKBKE	4.2844	2.09909	0.0316851
KCTD3	0.576346	-0.794993	0.0316851
CLEC2B	3.24839	1.69972	0.0317374
GZF1	0.664231	-0.590244	0.0317374
PYGL	3.12516	1.64393	0.0317374
FTH1	2.03948	1.0282	0.0322285
LGMN	1.77421	0.827178	0.0324543
CYTIP	3.05748	1.61234	0.0324554
CIITA	3.53984	1.82368	0.0324554
PDE7A	2.24434	1.16629	0.0324554
ARRB2	2.08871	1.06261	0.0324554
PRDX4	1.97713	0.983411	0.0325015
PCK2	2.53019	1.33925	0.0325272
C1orf204	0.522783	-0.935716	0.0326581
LIMK2	1.58312	0.662774	0.0327026
SYBU	0.266256	-1.90911	0.0327026
MCTP2	5.07808	2.34428	0.0327026
ETS2	1.98931	0.992269	0.0327026
ZFYVE19	1.47894	0.564567	0.0329971
SLC25A33	1.65338	0.725417	0.0329971
PLEC	0.580754	-0.784002	0.0331589
PSTK	0.589474	-0.762501	0.0331589
ZNF667	0.445466	-1.16661	0.0331589
KDM3B	0.660515	-0.598336	0.0331589
ANKRD57	2.34132	1.22732	0.0331589
COX5A	1.53594	0.619122	0.0331589
NFIX	0.413802	-1.27299	0.0331589
GBAP1	1.67628	0.745265	0.0331589
SPI1	2.97561	1.57319	0.0331589
AP3D1	0.735092	-0.444002	0.0331693
LRP2BP	0.468604	-1.09356	0.0331707
FOXL2	0.130989	-2.93248	0.0331707
TYROBP	3.05562	1.61146	0.0331707
HTR4	0.266515	-1.90771	0.0331707
TNFRSF21	3.42905	1.77781	0.0333029
TAOK2	0.682892	-0.550272	0.0333029
SLA	3.3552	1.7464	0.0333029
PNMA6A	0.220889	-2.1786	0.0333029
DKFZP586I1420	1.76609	0.820558	0.0333029
C11orf31	1.56734	0.648321	0.0333029
SPAG8	0.435074	-1.20067	0.0333029
VNN3	2.36527	1.242	0.0333029
PDIA3P	1.50843	0.593046	0.0333029
FCRL3	2.34046	1.22679	0.0333189
C15orf38	1.61685	0.693188	0.0334991
ZBTB7A	0.747717	-0.419435	0.0335375
UPF1	0.757465	-0.40075	0.0335388
TTLL2	0.531262	-0.912505	0.0335584
IL3RA	2.05286	1.03763	0.0337552
ATAD1	0.706134	-0.501986	0.0337552
SERPINE1	4.35938	2.12412	0.0338805
CBX4	0.610652	-0.711579	0.0338805
MRPS10	1.45195	0.537993	0.0341346
P2RY14	2.25448	1.1728	0.0341382
PNMA3	0.173166	-2.52978	0.0342158
TNF	2.87884	1.52549	0.0343594
ZNF641	0.500314	-0.999095	0.0344754
BATF3	2.90679	1.53943	0.0344754
ITGB2	3.21784	1.68609	0.0346278
MNT	0.731499	-0.451073	0.0346522
SH3BP1	2.69579	1.43071	0.0347228
LAMB2	0.580396	-0.784891	0.0350194
DUSP10	1.88976	0.9182	0.0351063
POLE4	1.69159	0.758379	0.0352677
ZNF136	0.647997	-0.625941	0.0352677
FTHL3	2.05703	1.04056	0.0352677
MYO1F	2.76936	1.46955	0.0352677
NSD1	0.728168	-0.457657	0.0353185
IRF8	3.06808	1.61734	0.0353185
ARHGAP12	0.598412	-0.740789	0.0353185
HLA-DRB1	3.70694	1.89023	0.0355812
RXRB	1.28357	0.360162	0.0357639
RNPEP	1.45543	0.541446	0.0357724
LILRB2	3.39735	1.76441	0.0357724
HLA-DPA1	3.22932	1.69123	0.0358315
FLOT1	1.38122	0.465941	0.0361556
ZSCAN1	0.227877	-2.13367	0.0361985
CHST13	3.36967	1.75261	0.0362263
DPT	6.23391	2.64014	0.0362263
AGTRAP	1.83317	0.874337	0.0363388
GBP6	2.34536	1.22981	0.0363388
COMMD1	1.39587	0.481169	0.0363388
VPS13A	0.539459	-0.890415	0.0363388
ALDH1A1	5.93215	2.56855	0.0366337
TAF8	1.32758	0.408803	0.0366337
CCL5	3.95259	1.9828	0.036744
IL22RA1	5.51667	2.4638	0.036744
C10orf32	0.576171	-0.795431	0.036744
SLC37A2	3.40294	1.76678	0.036744
EVX1	0.200898	-2.31547	0.036744
C19orf45	0.316626	-1.65915	0.0369428
ICOS	2.91701	1.54449	0.0369428
KIAA0892	0.722153	-0.469623	0.0369428
ACSBG1	2.96078	1.56598	0.0369428
ITGA4	2.70923	1.43788	0.0369428
HMGN4	1.3629	0.446684	0.0369428
IRF7	2.59261	1.3744	0.0369428
CD7	4.5061	2.17188	0.0369428
EGFLAM	3.32944	1.73528	0.0369428
C19orf35	2.34864	1.23182	0.0369428
PRR12	0.674317	-0.568501	0.0369428
C5orf20	2.40894	1.2684	0.0369428
NCAM1	0.197689	-2.33869	0.0369661
BTK	3.09182	1.62845	0.0369661
LGALS9	2.52051	1.33372	0.0370104
FAM171A1	0.339372	-1.55906	0.0370374
PSMA8	1.44718	0.533241	0.0370374
BTRC	0.684082	-0.547759	0.0370374
SLFN12L	1.98132	0.986465	0.0370374
INPP5D	2.3966	1.26099	0.0370374
APBA2	0.264324	-1.91962	0.0370374
BTBD1	1.38555	0.470462	0.0370374
IL12RB2	2.54835	1.34956	0.0370374
PANX1	1.56276	0.644099	0.0370374
PDLIM1	2.27775	1.18761	0.0370518
CD53	3.17798	1.66811	0.0370518
MAML1	0.721289	-0.47135	0.0370518
LTB	3.72327	1.89657	0.0370518
LSM6	1.3869	0.471869	0.0370941
BCL2	2.3885	1.2561	0.0370941
AQP3	4.51215	2.17382	0.0370941
C2orf28	1.35715	0.440575	0.0370941
SNRNP40	1.62712	0.702325	0.0370941
METT10D	0.738977	-0.436399	0.0370941
KLRF1	2.14039	1.09788	0.0370941
S100A16	3.21832	1.68631	0.0370941
C10orf18	0.670784	-0.576079	0.0370941
LAMC2	5.8672	2.55267	0.0370941
AP2A1	0.660251	-0.598914	0.0370941
MTSS1L	0.514963	-0.95746	0.0371714
TIFAB	1.8199	0.863855	0.0371873
TCF7L2	0.701498	-0.511489	0.0372338
MZF1	0.406866	-1.29737	0.0373278
PRF1	3.51578	1.81385	0.0374042
FAM96A	1.57016	0.650915	0.0374198
LOC285548	0.250453	-1.99739	0.0375798
TMEM71	2.8022	1.48656	0.0375798
HLA-DPB2	3.25411	1.70226	0.0376629
ZNF836	0.380337	-1.39465	0.0377839
VAMP8	3.27605	1.71196	0.0377839
MED20	1.41715	0.502996	0.0377839
ARHGDIB	2.17002	1.11771	0.0383059
AUTS2	0.451993	-1.14563	0.038345
HDC	3.93507	1.97639	0.038345
ZNF696	0.660894	-0.597508	0.038345
RNASEH2B	1.3983	0.483676	0.038345
CMKLR1	3.204	1.67987	0.038345
CCL13	5.58251	2.48091	0.0383587
CEBPB	1.76679	0.821132	0.0383605
CAV1	2.31444	1.21066	0.0383605
CECR7	0.192587	-2.37641	0.0384032
DTWD1	1.43324	0.519282	0.0384032
ZAP70	3.38113	1.75751	0.0384032
PRH1	0.579677	-0.786679	0.0384032
CSF2RB	2.83915	1.50546	0.0386725
SASH3	3.12569	1.64417	0.0386816
PTPRO	3.37513	1.75494	0.0387374
C5orf49	0.345017	-1.53526	0.0387374
LONP2	0.61705	-0.696542	0.0387702
MTHFS	1.65931	0.730582	0.0388231
CYBB	3.72192	1.89605	0.0388231
PTPRJ	2.49934	1.32155	0.0388252
SEPHS1	0.670871	-0.575893	0.0389732
NINJ2	3.54726	1.8267	0.0390045
PIK3R5	2.61077	1.38447	0.0390045
ANO9	3.05782	1.6125	0.0391729
C10orf93	0.293255	-1.76977	0.0391792
BIN2	2.97131	1.5711	0.0392013
MRPL14	1.5724	0.652967	0.0392013
CD93	2.04991	1.03556	0.0392013
C9	0.296676	-1.75304	0.0394212
FAM43B	0.246463	-2.02056	0.0394212
CXCR3	3.00314	1.58647	0.0394212
CD14	4.03984	2.0143	0.0395949
SH2B1	0.613338	-0.705246	0.0395949
CTCF	0.79636	-0.328508	0.0397043
SIDT1	3.44402	1.78409	0.0397043
TGM2	3.10238	1.63338	0.0397043
FOXK1	0.608847	-0.71585	0.0399768
ZNF37A	0.661924	-0.595262	0.0400761
CD79B	2.30012	1.20171	0.0400761
KRT18	4.89308	2.29074	0.0403081
C14orf72	1.73935	0.798547	0.0403457
CD69	4.0625	2.02237	0.0403722
BZRAP1	0.251806	-1.98962	0.0403722
MTPAP	0.73249	-0.44912	0.0405047
CD40LG	2.29484	1.1984	0.0406903
HMX1	0.197984	-2.33654	0.0407685
CRTC1	0.628836	-0.669244	0.0408023
SMTN	1.81541	0.860299	0.0410034
SLAMF6	3.43553	1.78053	0.0411326
RAB3A	0.42617	-1.2305	0.0411846
DGKZ	1.48335	0.56886	0.0413293
NFU1	1.37418	0.458575	0.0413293
TMEM194B	1.96826	0.97692	0.0413293
SIGLEC12	2.99336	1.58177	0.0415351
LRRC70	1.70931	0.773417	0.0415351
HAUS1	1.52417	0.608025	0.041665
CD80	2.57692	1.36565	0.0417516
ALDH3B1	4.15998	2.05658	0.0419379
TOMM22	1.40189	0.487375	0.0419503
TRAT1	2.59116	1.3736	0.0419503
KRT8	10.1604	3.34489	0.0419972
PCDHGC4	0.360175	-1.47323	0.0420116
S1PR3	0.342254	-1.54686	0.0421245
ADAM6	8.76717	3.13211	0.0422055
CCDC56	1.64986	0.72234	0.0422566
SLC27A1	0.506687	-0.980833	0.0422566
SLAMF1	2.58827	1.37199	0.0422566
NKG7	3.62327	1.85729	0.0422962
MEA1	1.57693	0.657116	0.0422962
MCF2L2	0.300268	-1.73568	0.0423148
SLC35C1	1.43094	0.51696	0.0423148
CAMK2B	0.250652	-1.99624	0.0424297
LAIR1	3.16627	1.66279	0.0424297
HVCN1	2.30582	1.20528	0.0424632
ZBP1	2.72111	1.44419	0.0425461
C3orf47	0.508311	-0.976218	0.0428804
ZNF510	0.664848	-0.588903	0.0431737
IL8	3.82361	1.93493	0.0433511
SPOCK1	0.128653	-2.95845	0.0434012
CORO1A	3.14614	1.65358	0.0435999
CAMP	2.59502	1.37575	0.0436324
S100A4	4.13564	2.04811	0.0436324
SYT3	0.221196	-2.1766	0.0436324
LOC399744	0.545727	-0.873748	0.0436324
CD3G	2.60573	1.38169	0.0436324
ITGAE	1.4992	0.584191	0.0438354
ROBLD3	1.45633	0.542332	0.0438354
USP7	0.785302	-0.348681	0.0438493
C5AR1	2.74959	1.45922	0.0438493
NAA38	1.33227	0.413881	0.0438493
PPM1G	1.42287	0.508809	0.0439175
APOBEC3F	2.4654	1.30182	0.0439175
BTN3A2	2.05414	1.03853	0.0439175
IL12RB1	3.04085	1.60447	0.0439175
SERPINF2	2.11228	1.0788	0.0439175
LILRB3	2.78997	1.48025	0.0439175
GPR39	3.32985	1.73546	0.0439175
HCLS1	2.62044	1.38981	0.0439175
ITGAL	3.04821	1.60796	0.0439175
AMICA1	3.30681	1.72544	0.0439175
ABHD3	1.92948	0.948215	0.0439175
ABT1	1.38948	0.474549	0.0439577
ZNF512B	0.721623	-0.470683	0.0439577
LGI2	2.94216	1.55688	0.0440504
DLX6AS	0.301068	-1.73184	0.0440878
NFAT5	0.599485	-0.738204	0.0444369
PPP3CB	0.76049	-0.394999	0.0445499
MRPL2	1.4221	0.50802	0.0445499
TNRC6A	0.682458	-0.551188	0.0445499
FCGR2B	4.19916	2.0701	0.0445499
UNC13B	0.604078	-0.727194	0.0445992
JMY	0.615497	-0.700177	0.0447553
LRRC4C	0.192504	-2.37704	0.0448009
CLIC5	4.5299	2.17948	0.0448009
ZNF573	0.517278	-0.950988	0.0448009
C1orf85	1.65219	0.724375	0.044847
ZFP2	0.382758	-1.38549	0.0449937
VMO1	2.67259	1.41824	0.0449937
ZNF454	0.29402	-1.76601	0.0449937
TDO2	5.97897	2.5799	0.0454813
FUT2	0.375455	-1.41329	0.0456456
ZNF180	0.659389	-0.600798	0.0456701
NFAM1	2.91294	1.54247	0.0456701
TIGIT	3.6119	1.85276	0.0457359
CACNA1B	0.158742	-2.65524	0.0457359
PARP14	1.67354	0.742907	0.0460576
DHRS3	2.35697	1.23693	0.0463734
MXI1	0.635774	-0.653415	0.0463734
INPP5A	0.634944	-0.655298	0.0463734
ATP8B4	3.06365	1.61525	0.0463734
TLR8	3.39191	1.7621	0.0463889
CD300C	2.88708	1.52961	0.0463889
ALOX5AP	4.00367	2.00132	0.0463889
EEF2	0.612214	-0.707893	0.0464085
ZMYM2	0.694432	-0.526095	0.0464601
PREB	1.31936	0.399844	0.0466163
C10orf111	0.603306	-0.729038	0.0466163
GZMK	4.68693	2.22864	0.0466163
WAPAL	0.786696	-0.346121	0.0466163
IL10RA	3.01694	1.59308	0.0466163
PAK7	0.133468	-2.90544	0.0466163
VEZT	0.700525	-0.513491	0.0466163
RHOBTB2	1.87118	0.903947	0.0466163
C10orf118	0.578712	-0.789083	0.0466163
IL2RB	3.49155	1.80387	0.0466163
KLRB1	3.76274	1.91178	0.0466163
CHST14	1.5678	0.648741	0.0466163
FUT7	2.89244	1.53229	0.0469498
PLP1	6.27551	2.64973	0.0469575
MS4A7	2.91401	1.54301	0.0471737
C9orf102	0.534489	-0.903769	0.0472202
ITK	3.62323	1.85728	0.0474165
GGTA1	2.81704	1.49418	0.0474165
ZBTB43	0.690349	-0.534602	0.0475949
PLA2G2D	2.37655	1.24887	0.0475949
NFKBIZ	3.0924	1.62873	0.0475949
TNIP2	1.4603	0.546261	0.0476348
FBXO45	1.48884	0.574189	0.0476348
MCOLN3	0.184531	-2.43806	0.0476348
CSF1	3.65028	1.86801	0.0477821
FANCE	1.92172	0.942397	0.0477883
ARHGAP9	3.13045	1.64637	0.0478647
DNPEP	1.28865	0.365859	0.0478647
NPL	2.27883	1.18829	0.0478647
DHRS7	0.527547	-0.922629	0.0478647
ATL2	0.633955	-0.657547	0.0478647
MMD2	0.148928	-2.74731	0.0478715
FAM193A	0.75286	-0.409547	0.0478715
MTMR11	0.532352	-0.909547	0.0478715
B4GALNT3	0.226139	-2.14472	0.0479745
DPY19L2P2	0.419035	-1.25486	0.048022
TBX21	2.78166	1.47594	0.0481945
KLHL6	2.56465	1.35876	0.0484976
PROK1	12.6502	3.66109	0.0487039
SEMA5B	2.10544	1.07412	0.0487039
C6orf47	1.32995	0.411374	0.0487754
PLAUR	2.83826	1.50501	0.0488296
SEZ6L	0.172297	-2.53703	0.0488945
ZMYND11	0.712464	-0.489111	0.0491174
ZFPM1	0.541778	-0.884226	0.0491677
LONRF2	0.229203	-2.1253	0.0491677
ZNF33A	0.661657	-0.595845	0.0494151
DPEP2	2.63775	1.39931	0.0494151
TUB	0.434075	-1.20398	0.0495398
DEF6	2.42954	1.28068	0.0495622
NLRP12	1.86497	0.899153	0.0495756
ALDH3B2	3.09056	1.62787	0.0495756
GPR123	0.340125	-1.55586	0.0498112
CD74	3.21057	1.68283	0.0498653

## Sheet: BLCA
id	fc	log2fc	padj
TAP1	11.534	3.52782	5.21029e-117
PSMB9	16.257	4.02299	2.33767e-88
TAP2	5.39246	2.43094	8.83311e-77
HLA-B	8.39542	3.0696	6.25893e-74
NLRC5	8.20011	3.03564	6.59955e-71
UBE2L6	5.86745	2.55273	7.51674e-70
GBP1	10.1232	3.3396	3.15171e-66
HLA-E	3.33078	1.73586	2.13002e-65
B2M	4.84289	2.27587	2.13002e-65
IRF1	5.42692	2.44013	3.72393e-65
HCP5	11.149	3.47884	8.88845e-65
STAT1	6.01297	2.58808	4.47834e-63
HLA-F	10.7163	3.42174	6.93759e-63
CXCL10	47.7111	5.57625	7.69759e-62
GBP5	39.1114	5.28952	1.83215e-58
PSMB8	4.60672	2.20374	5.52045e-58
HLA-A	6.19035	2.63002	9.84806e-58
IDO1	56.1525	5.81128	2.74484e-56
GZMB	25.3734	4.66524	5.23671e-56
HLA-H	6.13226	2.61642	3.91588e-54
IFNG	14.2184	3.82969	4.7569e-54
GBP4	7.98368	2.99705	6.3486e-54
CXCL11	44.6433	5.48037	8.22464e-54
WARS	7.66112	2.93756	3.20914e-53
BATF2	12.8001	3.67808	4.258e-53
IL12RB1	11.9305	3.57658	4.05991e-52
APOL3	5.9746	2.57884	3.33228e-51
LAG3	15.7953	3.98143	3.98176e-51
IFIH1	5.77885	2.53078	8.91974e-51
KIR2DL4	10.3765	3.37525	9.02379e-51
PRF1	12.8599	3.68481	1.31199e-50
CXCL9	43.2525	5.43471	2.4682e-50
PARP9	3.77675	1.91715	2.61903e-50
NKG7	15.7458	3.97689	1.23954e-49
BTN3A3	4.26217	2.09159	1.23954e-49
IL15RA	7.2069	2.84938	1.37404e-49
SAMD9L	8.58597	3.10198	2.54896e-49
HLA-C	4.16718	2.05907	3.34322e-49
GZMA	17.7527	4.14997	4.51363e-49
IFIT3	10.2496	3.3575	5.30609e-49
PDCD1	12.9032	3.68965	6.77919e-49
UBD	38.0658	5.25042	8.81548e-49
SLA2	9.24978	3.20942	1.27456e-47
TRIM22	7.11816	2.8315	3.98347e-47
ZBP1	15.1362	3.91994	5.31456e-47
GNLY	21.2288	4.40795	7.73669e-47
FASLG	9.40315	3.23314	3.08971e-46
CCL4	12.8231	3.68067	5.2775e-46
LAP3	3.43662	1.78099	8.67748e-46
ICOS	9.84922	3.30001	1.0147e-45
IFI35	4.14349	2.05085	1.41418e-45
TYMP	9.36409	3.22714	2.18773e-45
CD7	10.8354	3.43768	8.20002e-45
CD2	11.4268	3.51435	1.02659e-44
CIITA	10.6312	3.41024	1.89616e-44
IL15	5.70743	2.51284	3.49851e-44
CTLA4	10.2789	3.36162	3.49851e-44
IFI44L	14.318	3.83976	8.14172e-44
CXCR2P1	12.8039	3.67852	1.75614e-43
PARP14	2.96947	1.57021	2.49949e-43
CD74	7.66672	2.93861	3.54023e-43
DDX58	4.49743	2.1691	4.61098e-43
LOC400759	7.55283	2.91702	1.3573e-42
KLRD1	10.4357	3.38345	1.39688e-42
CMPK2	4.9419	2.30506	2.18509e-42
CD8A	11.7322	3.5524	2.89513e-42
HLA-DRA	9.78779	3.29098	2.89513e-42
CD80	8.21894	3.03895	3.03825e-42
CD274	10.9538	3.45336	3.03825e-42
PDCD1LG2	12.8554	3.6843	3.46432e-42
CCR5	9.02891	3.17455	3.77721e-42
DTX3L	2.52445	1.33597	4.32936e-42
IFITM1	8.23661	3.04205	4.91912e-42
PTPN7	8.34654	3.06118	6.4537e-42
IFI44	8.75965	3.13087	8.16106e-42
TRIM21	2.7626	1.46603	9.7955e-42
IFI30	5.92669	2.56723	1.78509e-41
HCG26	5.80597	2.53754	2.12992e-41
EPSTI1	9.84809	3.29984	2.20998e-41
HLA-DPA1	9.03914	3.17618	2.64755e-41
TNFSF13B	8.27278	3.04837	3.54961e-41
TBX21	7.54322	2.91518	3.88994e-41
CD3E	9.48547	3.24572	4.16333e-41
IL21R	11.4864	3.52186	5.75305e-41
TAPBP	2.52794	1.33797	6.82166e-41
DDX60	6.01413	2.58836	8.11239e-41
GZMH	13.4252	3.74687	1.13675e-40
STAT4	6.55601	2.71282	1.38747e-40
CXCR6	7.7311	2.95067	2.14822e-40
IL2RB	7.50074	2.90703	2.48479e-40
IL2RG	8.73654	3.12706	5.18045e-40
SP110	3.30008	1.7225	1.03184e-39
BTN3A1	2.92886	1.55034	1.12075e-39
PARP12	2.90116	1.53663	1.46611e-39
JAKMIP1	8.82554	3.14168	1.88293e-39
CD38	13.9712	3.80439	2.11486e-39
CFB	9.91125	3.30907	2.20666e-39
HAVCR2	7.32736	2.87329	2.90891e-39
PTPN22	8.13856	3.02477	4.00839e-39
TNFRSF9	6.93466	2.79382	5.7506e-39
CASP1	6.31948	2.65981	1.62129e-38
ISG20	5.38091	2.42785	2.10868e-38
UBASH3A	7.85941	2.97442	2.42606e-38
HLA-DMB	7.59791	2.9256	2.53135e-38
LCP2	5.60336	2.48629	3.22353e-38
HLA-DRB1	9.27215	3.2129	3.37782e-38
OAS2	5.78452	2.5322	5.92266e-38
ARHGAP9	7.89726	2.98135	6.94018e-38
MYO1G	8.01428	3.00257	1.19823e-37
CXCR3	8.38906	3.06851	1.52276e-37
TIGIT	8.60446	3.10509	2.34806e-37
SECTM1	10.1465	3.34291	2.7118e-37
IL32	7.99842	2.99972	3.89946e-37
ACAP1	7.10928	2.8297	3.94465e-37
HLA-DPB1	7.55873	2.91814	4.63129e-37
LOC400696	10.4616	3.38703	6.95515e-37
ZNF683	13.2875	3.732	7.66041e-37
FYB	9.14356	3.19276	8.66678e-37
NMI	2.69179	1.42856	9.11021e-37
RSAD2	9.02001	3.17313	1.19121e-36
SLFN12L	5.06029	2.33922	1.21369e-36
CARD16	4.74578	2.24665	1.30701e-36
C5orf56	3.46855	1.79433	1.43326e-36
ETV7	4.97387	2.31437	1.46135e-36
IL18RAP	5.78663	2.53272	1.68591e-36
XAF1	5.54258	2.47056	1.76756e-36
PSME2	2.46483	1.30149	1.89582e-36
SP140	5.90984	2.56312	2.13751e-36
APOL6	3.14214	1.65175	2.14606e-36
SPN	6.19999	2.63227	2.68626e-36
CD3G	7.24429	2.85684	2.70267e-36
DOK2	7.0678	2.82126	2.75696e-36
AIM2	26.2709	4.71539	3.17674e-36
SLAMF8	7.33853	2.87549	3.24772e-36
KLRC1	6.7939	2.76424	5.85041e-36
ODF3B	4.28869	2.10054	6.8364e-36
GPR171	6.90225	2.78707	7.11137e-36
TNIP3	7.96311	2.99333	8.35044e-36
ITK	8.0501	3.00901	1.17853e-35
CCL5	10.5824	3.40359	1.31373e-35
ITGAL	7.72587	2.9497	1.35226e-35
SH2D1A	8.12973	3.02321	2.535e-35
SMTNL1	4.55482	2.18739	4.11269e-35
THEMIS	7.1072	2.82928	4.11269e-35
MX1	5.57008	2.4777	5.63879e-35
IFITM3	5.09853	2.35008	6.06529e-35
IRF9	2.60654	1.38214	8.71247e-35
PATL2	4.53517	2.18116	9.1157e-35
CCL3	9.07418	3.18177	9.68875e-35
PYHIN1	7.7384	2.95204	1.09673e-34
STX11	4.23975	2.08398	1.30741e-34
HLA-DRB5	9.81658	3.29522	1.50774e-34
SLAMF1	7.16932	2.84184	2.2936e-34
FCER1G	6.86564	2.77939	2.47428e-34
BTN3A2	3.13682	1.6493	2.79094e-34
SASH3	7.20675	2.84935	3.24064e-34
LILRB2	9.0747	3.18185	3.50283e-34
CYTH4	6.38335	2.67431	3.64688e-34
IL2RA	9.5754	3.25933	4.26046e-34
FAM26F	7.36562	2.88081	4.42904e-34
HCST	6.08102	2.60431	4.53531e-34
KLRK1	6.81255	2.76819	4.97945e-34
MNDA	7.99662	2.99939	4.993e-34
IFIT2	6.50377	2.70128	5.12678e-34
HLA-DQB1	8.63291	3.10985	6.01185e-34
C1QA	8.91967	3.15699	6.80856e-34
HAPLN3	6.58785	2.71981	6.80856e-34
NCF2	6.87314	2.78097	7.07876e-34
HCK	6.9186	2.79048	8.61114e-34
BCL2A1	8.62189	3.108	9.26317e-34
C1QC	8.8327	3.14285	1.27598e-33
HERC6	4.90583	2.2945	1.3043e-33
C1QB	9.47246	3.24374	1.44718e-33
CD86	5.63173	2.49358	1.72217e-33
IFI27	10.5273	3.39607	1.92802e-33
SLC15A3	5.23894	2.38928	2.08043e-33
PTPRC	8.73598	3.12697	2.17516e-33
HLA-DQA1	10.6701	3.4155	4.15545e-33
CD226	4.75795	2.25034	4.89972e-33
CD3D	8.72888	3.1258	4.91206e-33
SIGLEC1	7.76675	2.95731	5.64874e-33
LAT2	4.53928	2.18246	6.07973e-33
HLA-DMA	4.44972	2.15372	6.214e-33
LAMP3	5.06616	2.34089	6.62913e-33
RARRES3	9.42091	3.23587	7.843e-33
TBC1D10C	6.91338	2.78939	7.89989e-33
HK3	8.91535	3.15629	8.51756e-33
CXCL13	23.31	4.54288	1.30467e-32
SPI1	5.8627	2.55157	1.43513e-32
RUNX3	6.34151	2.66483	1.6871e-32
CST7	7.51065	2.90894	1.73783e-32
SLAMF6	8.32717	3.05783	2.21522e-32
CYTIP	6.24569	2.64286	2.25159e-32
PML	2.26552	1.17984	2.79055e-32
SAMSN1	6.66794	2.73724	3.22897e-32
CD247	5.73565	2.51996	4.72865e-32
CYBB	8.11635	3.02083	4.72865e-32
HLA-DOB	6.85493	2.77714	4.98123e-32
ITGB2	7.281	2.86414	5.63195e-32
CASP5	5.23629	2.38854	5.63195e-32
HLA-DRB6	8.8338	3.14303	7.39463e-32
RHOH	7.44155	2.8956	8.51035e-32
IGSF6	5.44121	2.44393	8.51035e-32
FCGR3A	10.0385	3.32747	9.58811e-32
SLA	6.01426	2.58839	1.19373e-31
DOCK2	7.71801	2.94823	1.44739e-31
MMP25	3.79345	1.92351	1.53585e-31
MIR155HG	4.66514	2.22192	1.59063e-31
TRAT1	6.17585	2.62664	1.59464e-31
TMEM150B	6.98471	2.8042	1.61689e-31
TRAF3IP3	4.88117	2.28723	1.6873e-31
SIT1	7.9287	2.98708	1.75955e-31
SAMHD1	4.38585	2.13286	1.87602e-31
ICAM1	6.0032	2.58573	2.40587e-31
KLRC2	6.77361	2.75992	2.62119e-31
PLSCR1	2.48763	1.31477	2.69002e-31
AIF1	5.91915	2.56539	3.62376e-31
PIK3AP1	6.11194	2.61163	4.00035e-31
NCF1	8.61035	3.10607	4.02804e-31
PLEK	6.98344	2.80394	4.02804e-31
SNX20	5.37732	2.42689	4.22419e-31
TLR8	8.19144	3.03412	4.32386e-31
FERMT3	4.40891	2.14042	4.32386e-31
FCGR1B	6.40925	2.68016	4.97624e-31
GNGT2	3.96675	1.98796	1.05446e-30
ALOX5AP	6.95089	2.7972	1.34568e-30
CD53	6.5911	2.72052	1.3706e-30
AOAH	9.90363	3.30796	1.4713e-30
CSF1	4.41335	2.14187	1.62821e-30
RASAL3	4.53881	2.18231	1.69863e-30
LILRB4	11.0688	3.46842	1.85246e-30
GPR65	4.70356	2.23375	2.16658e-30
P2RY10	5.56418	2.47617	2.80019e-30
ZBED2	13.0246	3.70316	2.87405e-30
SOCS1	3.82899	1.93696	3.24095e-30
FUT7	5.11407	2.35447	3.81371e-30
LILRP2	3.19964	1.67791	3.90751e-30
TYROBP	5.47683	2.45334	4.58017e-30
MYO1F	4.27383	2.09553	4.61415e-30
BIN2	5.2946	2.40452	4.6153e-30
DPYD	7.11052	2.82996	5.01144e-30
GPR114	6.32703	2.66153	6.07869e-30
FCGR1A	7.92193	2.98585	6.24596e-30
OPTN	2.63493	1.39777	6.34217e-30
GRAP2	5.24675	2.39142	6.78237e-30
IL12RB2	10.6596	3.41408	7.41309e-30
CD27	6.21061	2.63473	7.61375e-30
EVI2B	5.68633	2.5075	7.70124e-30
FOXP3	4.4688	2.15989	9.31842e-30
C2	6.43256	2.68539	9.8199e-30
SELPLG	5.29477	2.40457	1.78526e-29
FCGR2A	6.13298	2.61659	1.89796e-29
TAGAP	5.4046	2.43419	1.93549e-29
IFIT1	8.58464	3.10176	1.98488e-29
ZAP70	6.0335	2.59299	2.0618e-29
CCL4L2	8.14221	3.02542	2.45667e-29
CD300LF	5.34168	2.41729	2.51481e-29
SAMD3	5.56223	2.47566	2.52384e-29
CLEC4A	4.29073	2.10122	2.54076e-29
TNFAIP8L2	4.59511	2.2001	2.71444e-29
SERPING1	5.44011	2.44364	2.97386e-29
C3AR1	6.80794	2.76722	3.06808e-29
JAK2	2.7648	1.46717	3.80084e-29
CD300A	4.25135	2.08792	3.84796e-29
CD14	5.7876	2.53296	5.89416e-29
NFAM1	5.26339	2.39599	6.88995e-29
CD6	5.76045	2.52618	8.18438e-29
GFI1	5.12268	2.3569	8.72423e-29
IL4I1	4.19122	2.06737	8.9603e-29
CCL8	8.03485	3.00627	9.21043e-29
LST1	5.04153	2.33386	9.22861e-29
CRTAM	5.48147	2.45456	9.75674e-29
KSR2	0.0871543	-3.52028	9.93814e-29
LTA	4.46165	2.15758	1.14801e-28
TLR1	4.61654	2.20681	1.15636e-28
NCKAP1L	7.13639	2.83519	1.29224e-28
TMEM140	2.25958	1.17605	1.30675e-28
SUSD3	5.17448	2.37141	1.33216e-28
NCF1C	7.77595	2.95902	1.3424e-28
IFIT5	2.88693	1.52953	1.53855e-28
WAS	4.71575	2.23749	1.53902e-28
SERPINB1	4.04919	2.01763	1.67388e-28
IFI6	6.98306	2.80386	1.77751e-28
LRRC25	5.29821	2.40551	2.30709e-28
RTP4	4.79642	2.26196	2.56829e-28
IL10RA	4.95561	2.30906	2.62394e-28
SIGLEC10	6.80689	2.76699	3.17181e-28
LILRA6	6.91021	2.78873	3.29211e-28
NLRC3	3.36982	1.75267	3.35354e-28
CD48	6.30924	2.65747	3.35354e-28
LILRA3	7.61724	2.92927	3.58727e-28
LILRB1	5.37624	2.4266	4.40397e-28
FCGR1C	5.74666	2.52272	6.50466e-28
OAS3	2.98225	1.5764	6.90972e-28
SRGN	4.80018	2.26309	6.92508e-28
SIRPG	6.79183	2.7638	7.3837e-28
LILRB3	5.14329	2.36269	1.0333e-27
NLRP3	4.92312	2.29957	1.12039e-27
CD5	5.63766	2.4951	1.39029e-27
TARP	4.72536	2.24043	2.06024e-27
LCK	4.83866	2.27461	2.36764e-27
FPR3	7.44739	2.89674	2.5224e-27
CXorf21	4.37937	2.13072	2.69589e-27
MS4A6A	5.60184	2.4859	2.80383e-27
FMNL1	3.61224	1.85289	3.14206e-27
CLEC4E	7.19953	2.8479	3.3844e-27
DOCK10	5.0264	2.32953	3.3844e-27
GPR84	4.38381	2.13218	3.39752e-27
LOC100188949	4.14115	2.05003	4.34333e-27
KIAA0114	0.348906	-1.51909	4.34333e-27
ZNFX1	1.91979	0.940951	4.53838e-27
C1orf162	4.16168	2.05717	4.60571e-27
PIK3CD	3.89683	1.9623	5.70776e-27
SIGLEC9	5.05464	2.33761	6.01617e-27
GVIN1	4.50971	2.17304	6.47921e-27
OASL	5.44668	2.44538	6.59725e-27
GPR25	3.27594	1.71191	6.81047e-27
PSTPIP1	4.9616	2.31081	6.89397e-27
C19orf45	0.138858	-2.84832	6.94595e-27
BIRC3	5.93181	2.56847	7.23109e-27
CD300C	5.05017	2.33633	7.6054e-27
SP100	2.16872	1.11684	7.93078e-27
CD52	5.0874	2.34693	8.12508e-27
CD84	6.1701	2.62529	1.2226e-26
SAMD9	5.45759	2.44827	1.2663e-26
NCF1B	5.83799	2.54547	1.31079e-26
LAIR1	5.44883	2.44595	1.36944e-26
SLC7A7	5.08831	2.34719	1.61196e-26
SLAMF7	5.43723	2.44287	1.65063e-26
SAA1	24.9673	4.64197	1.7305e-26
CD47	2.44525	1.28998	1.83042e-26
SIGLEC7	5.41098	2.43589	2.69774e-26
PIK3R5	4.46548	2.15881	2.95854e-26
MEFV	5.38664	2.42939	3.25246e-26
OSCAR	4.56399	2.19029	3.26346e-26
PSME1	1.82446	0.867473	3.70573e-26
IKZF1	5.26773	2.39718	3.85323e-26
HLA-DOA	6.4672	2.69314	4.14643e-26
MT2A	7.72556	2.94964	4.63377e-26
TNFSF10	4.45224	2.15453	4.86476e-26
LILRA5	6.0815	2.60443	5.24079e-26
SERPINB9	4.01944	2.007	5.26336e-26
SOD2	3.10249	1.63342	5.53274e-26
PARVG	5.01428	2.32604	7.40442e-26
SCML4	5.43422	2.44207	7.45346e-26
IRF4	5.97776	2.5796	8.4877e-26
RAB27A	2.30658	1.20576	9.24178e-26
TIFAB	4.54516	2.18433	9.74339e-26
HERC5	5.48792	2.45626	1.01454e-25
GPR174	4.06946	2.02484	1.22146e-25
C1orf38	4.0681	2.02435	1.27853e-25
CCDC109B	3.36143	1.74908	1.74204e-25
BTK	5.19194	2.37627	2.34165e-25
ABI3	3.21033	1.68272	2.61927e-25
SERPINA1	9.92961	3.31174	3.17396e-25
PRIC285	2.40337	1.26506	3.42081e-25
FAS	3.54034	1.82389	3.53215e-25
STAT2	1.84127	0.8807	3.64953e-25
CMKLR1	5.47727	2.45346	3.80302e-25
TRIM69	2.76097	1.46517	4.01612e-25
MLKL	2.25139	1.17082	4.27241e-25
MSN	3.75012	1.90694	4.42298e-25
TLR6	4.03859	2.01385	5.88294e-25
RERE	0.55474	-0.850115	5.98062e-25
SRCIN1	0.146029	-2.77568	6.55358e-25
RNASE6	4.64011	2.21416	7.88103e-25
RGS18	3.93393	1.97597	8.11653e-25
ITGAX	4.89023	2.2899	1.11439e-24
RNF213	2.31075	1.20836	1.31303e-24
KLHDC7B	15.8864	3.98972	1.37921e-24
AMICA1	4.16375	2.05788	1.60713e-24
EOMES	5.37382	2.42595	1.62164e-24
VSIG4	7.89675	2.98126	1.70403e-24
EVI2A	4.79563	2.26172	1.76297e-24
GNB4	3.73643	1.90166	2.15645e-24
MBTD1	0.489885	-1.02948	2.22153e-24
P2RY13	4.77958	2.25688	2.22711e-24
CD209	6.29002	2.65306	2.49957e-24
CEACAM4	4.60055	2.20181	2.751e-24
TOX3	0.0271835	-5.20113	2.751e-24
HLA-DQA2	8.52055	3.09095	2.80881e-24
GZMK	8.44157	3.07751	2.97405e-24
USP18	2.94243	1.55701	3.01085e-24
IFI16	4.43876	2.15016	3.14751e-24
FPR2	5.32594	2.41304	3.24491e-24
CD163	9.42717	3.23682	3.26956e-24
LAPTM5	4.07297	2.02608	3.30718e-24
CORO1A	3.51682	1.81427	3.35042e-24
FAM78A	3.31943	1.73093	3.42228e-24
SQRDL	2.65203	1.4071	3.42228e-24
CFLAR	2.03374	1.02413	3.58124e-24
HPS5	1.83052	0.87225	3.76237e-24
CSF1R	5.31913	2.41119	3.9149e-24
KIAA1949	2.50688	1.32589	4.30301e-24
ZNF831	4.73806	2.2443	4.30301e-24
PTPRCAP	4.40391	2.13879	4.40862e-24
KLRC3	4.21078	2.07409	6.49968e-24
FGD2	4.26624	2.09297	6.53779e-24
MCOLN2	4.56836	2.19168	7.68727e-24
NUB1	1.63781	0.711766	1.03888e-23
TLR2	3.77376	1.916	1.2186e-23
C1R	4.08164	2.02915	1.22977e-23
SAA2	15.798	3.98167	1.2995e-23
STK17A	2.44563	1.2902	1.33745e-23
MPEG1	4.61403	2.20603	1.77867e-23
EIF2AK2	2.1329	1.09282	1.94528e-23
HPSE	5.12815	2.35844	2.12524e-23
BST2	5.28113	2.40085	2.12845e-23
ZMYND15	3.33333	1.73696	2.6883e-23
MAP4K1	4.96451	2.31165	2.99934e-23
NOD2	4.84129	2.27539	3.39459e-23
FLJ36031	3.05613	1.61171	3.51714e-23
TTC24	3.20584	1.6807	3.61776e-23
CEACAM21	3.83966	1.94098	3.85111e-23
ZC3H12D	3.54617	1.82626	3.87672e-23
FKBP5	4.19613	2.06906	4.05652e-23
ACY3	4.86774	2.28325	4.13439e-23
GZMM	5.01613	2.32657	4.64661e-23
IL27	2.9762	1.57347	6.34878e-23
C15orf17	0.49997	-1.00009	7.77655e-23
C19orf35	2.8195	1.49544	7.86942e-23
BATF3	3.4324	1.77922	9.96476e-23
CD8B	6.63523	2.73015	1.02432e-22
TNFRSF1B	2.82414	1.49781	1.02432e-22
EMR1	6.68189	2.74026	1.46854e-22
CD4	3.45319	1.78793	1.46976e-22
MAML3	0.392865	-1.34789	1.55416e-22
CD33	3.98974	1.99629	1.55628e-22
TRAK1	0.376558	-1.40906	1.66359e-22
CCL18	14.1377	3.82147	2.32634e-22
IRF8	5.77254	2.52921	2.52597e-22
ITGAM	4.87606	2.28572	2.83639e-22
C9orf21	3.0024	1.58612	3.04416e-22
TRIM14	2.09835	1.06926	3.2689e-22
GPR82	3.23916	1.69562	3.69449e-22
ARHGAP25	2.67742	1.42084	3.77229e-22
MS4A4A	5.65997	2.50079	5.04106e-22
MIAT	4.43538	2.14906	5.38015e-22
BLVRA	2.6204	1.38978	5.41952e-22
C6orf150	3.73739	1.90203	5.65674e-22
TAPBPL	2.34427	1.22914	5.79339e-22
GAB3	3.12081	1.64192	6.76373e-22
RGS1	5.2344	2.38803	6.90867e-22
FCRL6	3.81362	1.93116	6.90908e-22
CYLD	1.89651	0.923347	6.97586e-22
LAX1	4.76424	2.25225	7.77248e-22
CLEC5A	4.70893	2.2354	7.91527e-22
NLRC4	2.47184	1.30559	8.1749e-22
MSR1	4.77184	2.25455	9.42145e-22
CLEC7A	4.903	2.29367	1.01111e-21
TNFRSF18	5.23118	2.38714	1.08572e-21
SCO2	1.95381	0.966294	1.08572e-21
LOC100233209	3.76733	1.91354	1.55946e-21
EBI3	4.63157	2.2115	1.6228e-21
PILRA	4.5237	2.1775	2.25453e-21
LYN	2.6522	1.40719	2.25453e-21
CCR8	3.35899	1.74803	2.32361e-21
CD101	2.64512	1.40333	2.34317e-21
IFT140	0.402663	-1.31235	2.45136e-21
IL7R	6.4445	2.68807	2.66546e-21
PIK3R6	3.18687	1.67214	2.85555e-21
CD37	4.72509	2.24034	2.86365e-21
C17orf87	4.15605	2.05521	2.97159e-21
RASSF4	3.25204	1.70135	2.97623e-21
BTN2A2	2.21313	1.14608	3.12207e-21
CCR1	4.10855	2.03863	3.34635e-21
KLRB1	5.0598	2.33908	3.60923e-21
CD28	3.89724	1.96245	3.61245e-21
RNF19B	2.06455	1.04582	3.72572e-21
MICB	3.85151	1.94542	3.83414e-21
FAM190A	0.163347	-2.61399	4.18439e-21
ARNTL2	3.89696	1.96235	4.59398e-21
CDC25B	2.64582	1.40372	4.73578e-21
GLT1D1	3.36774	1.75178	5.2433e-21
CXCL16	2.35252	1.2342	5.29911e-21
PCMTD2	0.535608	-0.900751	5.72959e-21
ISG15	3.66195	1.87261	5.72959e-21
BTLA	4.05792	2.02074	6.66866e-21
TM7SF2	0.258186	-1.95352	7.08993e-21
WDFY4	5.51677	2.46382	7.34611e-21
RHOG	1.74948	0.80693	7.35712e-21
CCL13	6.89304	2.78514	7.93873e-21
CLEC4D	3.0597	1.61339	8.12509e-21
FAM54B	0.650513	-0.62035	8.14464e-21
GCNT1	5.3023	2.40662	8.9039e-21
PLAUR	3.35155	1.74483	8.91938e-21
C17orf28	0.164031	-2.60796	9.18497e-21
ZBTB32	3.20574	1.68066	9.21421e-21
SLC35E2	0.480702	-1.05679	9.99822e-21
CASP4	2.36086	1.23931	1.02784e-20
CD68	2.88136	1.52675	1.03668e-20
TFEC	4.84696	2.27708	1.10562e-20
CARD17	3.47801	1.79826	1.25827e-20
HLA-G	4.23628	2.0828	1.29495e-20
LTB	4.58526	2.197	1.35141e-20
SLC9A2	0.0947943	-3.39906	1.36949e-20
GPR68	4.40698	2.13979	1.39609e-20
RASGRP4	3.22475	1.68919	1.50838e-20
ZNF80	3.15644	1.6583	1.51231e-20
FGL2	4.40025	2.13759	1.51904e-20
C12orf70	3.37345	1.75422	1.59513e-20
OVGP1	0.24869	-2.00758	1.63744e-20
LCP1	4.12745	2.04525	1.65192e-20
TTC7A	1.97878	0.984611	1.96093e-20
RAC2	3.24476	1.69811	2.03924e-20
VNN2	4.75597	2.24974	2.40255e-20
C11orf21	3.40471	1.76753	2.59674e-20
MOBKL2B	3.44767	1.78562	2.86309e-20
CASKIN1	0.202306	-2.30539	3.51715e-20
LY9	4.88498	2.28835	3.6572e-20
PATZ1	0.467776	-1.09611	3.91714e-20
EMP3	3.78332	1.91965	3.99044e-20
NCR3	3.43648	1.78093	4.09971e-20
SLCO2B1	4.83823	2.27448	5.72292e-20
ADCY7	2.93457	1.55315	5.73025e-20
DDX60L	2.78987	1.4802	5.94068e-20
GLIPR1	3.22367	1.6887	6.45656e-20
PLA2G12A	0.620205	-0.689183	6.64487e-20
PTGDR	3.06049	1.61376	7.0249e-20
S100B	4.79803	2.26244	7.07113e-20
C19orf38	3.00672	1.58819	7.11434e-20
WIPF1	3.01824	1.59371	7.54222e-20
C1orf213	0.395695	-1.33754	7.78973e-20
OTUD3	0.511894	-0.966083	8.5553e-20
OGFRL1	3.67849	1.87911	1.01056e-19
HIVEP3	2.76009	1.46472	1.05542e-19
FPR1	5.43737	2.44291	1.05542e-19
CLECL1	3.18067	1.66933	1.10057e-19
RUFY4	4.23552	2.08254	1.11738e-19
SIRPA	3.47869	1.79854	1.1748e-19
KIR2DL3	2.6988	1.43232	1.23828e-19
TDRD7	1.78354	0.83474	1.28423e-19
KIAA0748	3.79522	1.92418	1.33081e-19
CCL7	4.9631	2.31124	1.39081e-19
ADAR	1.57461	0.654991	1.41427e-19
LYZ	6.11488	2.61232	1.42071e-19
RAB15	0.270675	-1.88536	1.42071e-19
CD82	3.37222	1.7537	1.4907e-19
RELB	2.07633	1.05403	1.50226e-19
P2RY6	4.77148	2.25444	1.56799e-19
CD70	5.81703	2.54028	1.65966e-19
LRFN2	0.158547	-2.65702	1.75307e-19
C15orf53	1.78772	0.838123	1.77791e-19
ACP5	2.66801	1.41576	1.82508e-19
BAK1	1.92238	0.942894	1.94982e-19
GLIPR2	3.56855	1.83534	2.00404e-19
LOC400027	0.527119	-0.923801	2.04255e-19
TBXAS1	4.14306	2.0507	2.11368e-19
ARRDC5	2.3968	1.26111	2.58788e-19
GPR183	4.14249	2.0505	2.86678e-19
SUOX	0.49602	-1.01153	3.02638e-19
C20orf151	0.143941	-2.79645	3.13816e-19
UPK1A	0.027233	-5.1985	3.18422e-19
PSMB10	2.27067	1.18312	3.61707e-19
SYTL3	2.61928	1.38917	3.65798e-19
PANX1	2.01131	1.00814	3.70839e-19
ABCD2	3.57972	1.83985	3.89831e-19
RHOU	0.229823	-2.1214	4.07902e-19
STAT3	1.62633	0.701616	4.20982e-19
LY96	3.84692	1.9437	4.8722e-19
MFAP3L	0.207434	-2.26928	5.0246e-19
CERKL	3.00776	1.58869	5.17559e-19
RNASE2	3.85539	1.94688	5.18045e-19
TREM2	4.1465	2.05189	5.2585e-19
FAM179A	3.12635	1.64448	5.59766e-19
RGS20	6.01158	2.58774	5.70902e-19
BEND5	0.192473	-2.37727	5.85536e-19
MCL1	1.69338	0.75991	6.42233e-19
IL13RA1	1.7569	0.81303	6.51492e-19
PSMA6	1.53841	0.621443	6.57687e-19
SIGLEC12	5.13731	2.36101	6.82687e-19
LILRB5	4.66361	2.22145	7.54786e-19
CCR2	4.34658	2.11988	7.70048e-19
IL18BP	2.16449	1.11403	7.71941e-19
RAP1GAP	0.193925	-2.36643	8.1757e-19
SEMA6A	0.176857	-2.49935	8.38637e-19
MRC1	5.24693	2.39147	8.54571e-19
PDZK1IP1	12.1031	3.5973	8.72474e-19
ITGA4	3.51949	1.81536	8.72925e-19
ELF5	0.112995	-3.14566	9.25683e-19
C9orf91	1.63466	0.708991	9.59869e-19
IRF7	3.15474	1.65752	1.02116e-18
AADAT	0.307858	-1.69966	1.12821e-18
LOC100144604	0.0851427	-3.55397	1.1757e-18
MGC12916	3.35194	1.745	1.19747e-18
NCR1	2.15996	1.111	1.2972e-18
CBY1	0.607658	-0.718669	1.29894e-18
TMEM149	2.21584	1.14785	1.37033e-18
CACNA1D	0.109073	-3.19664	1.40383e-18
FLT3LG	2.35251	1.2342	1.52977e-18
RASGRP1	4.24305	2.0851	1.55142e-18
ST8SIA4	2.53165	1.34008	1.57218e-18
FNBP1L	0.485414	-1.04271	1.76831e-18
NCRNA00152	3.22743	1.69038	1.82166e-18
ADORA3	3.38495	1.75914	2.11158e-18
C17orf69	0.459257	-1.12263	2.18254e-18
HLA-DQB2	5.78646	2.53268	2.31116e-18
SNX31	0.0383459	-4.70478	2.32315e-18
TMEM106A	3.35638	1.74691	2.3283e-18
SH2D1B	2.76417	1.46684	2.52161e-18
ZNF443	0.448	-1.15843	2.57234e-18
SPATC1	2.47172	1.30552	2.58743e-18
ADAMDEC1	7.61259	2.92839	2.61009e-18
REEP6	0.227031	-2.13904	2.71295e-18
IGF2BP2	8.50353	3.08806	2.723e-18
C9orf139	2.71739	1.44222	2.93034e-18
GPR132	3.40347	1.76701	3.04691e-18
CR1L	2.8888	1.53047	3.32195e-18
ZC3HAV1	1.5592	0.640803	3.4352e-18
ACOX1	0.435272	-1.20001	3.51408e-18
HMGCS2	0.0217194	-5.52487	3.51408e-18
SPHK1	4.72121	2.23916	3.5556e-18
PPM1H	0.22635	-2.14337	4.00598e-18
IL18R1	2.84293	1.50738	4.29839e-18
FAM20A	4.86748	2.28317	4.30071e-18
ZFHX3	0.447515	-1.15999	4.34174e-18
FAM174B	0.191202	-2.38683	4.67786e-18
CD180	4.10104	2.03599	5.26384e-18
C1S	4.56341	2.19011	5.27076e-18
THRB	0.278515	-1.84417	5.33477e-18
TNFAIP3	2.96919	1.57007	5.46995e-18
PPIL5	1.65319	0.725249	5.56073e-18
GIMAP2	2.5616	1.35704	5.57032e-18
LYSMD2	1.84345	0.882407	5.57032e-18
FOXH1	0.24367	-2.037	5.59103e-18
CEBPE	2.21638	1.1482	5.99621e-18
TMEM173	2.42365	1.27718	6.0851e-18
LAIR2	3.40856	1.76916	6.29218e-18
CLEC2B	4.08094	2.0289	6.31556e-18
TSPAN32	3.21273	1.6838	7.1993e-18
IL7	2.84965	1.51078	7.2437e-18
LOC100188947	0.0851413	-3.554	7.50676e-18
C5AR1	3.69549	1.88577	7.9633e-18
BIN1	3.61129	1.85251	8.38985e-18
C5orf20	3.7504	1.90705	8.40636e-18
UBN2	0.584413	-0.774939	8.48863e-18
MPP1	3.30826	1.72607	8.54443e-18
GRAMD1B	3.52569	1.8179	8.71757e-18
FLJ37453	0.507835	-0.977568	9.1542e-18
2022-09-01	2.98232	1.57644	9.99503e-18
RGL4	2.78331	1.4768	1.12674e-17
CAB39L	0.258542	-1.95153	1.20094e-17
LY86	3.83764	1.94022	1.20435e-17
GPR55	2.76795	1.46882	1.25298e-17
ADAP2	2.60958	1.38382	1.31704e-17
RHOF	5.86157	2.55129	1.41502e-17
WBP1	0.582405	-0.779905	1.508e-17
ICA1	0.298603	-1.7437	1.52169e-17
EEF1A2	0.0687841	-3.86178	1.58133e-17
DHRS2	0.0456612	-4.45289	1.60194e-17
PHLDB3	0.433939	-1.20444	1.67836e-17
SCAP	0.522243	-0.937206	1.82489e-17
ANXA5	2.41179	1.27011	1.82931e-17
GPR97	3.7279	1.89836	1.97646e-17
FADS6	0.12632	-2.98485	1.97646e-17
ZNF823	0.438165	-1.19046	2.0036e-17
CTSB	2.22917	1.15651	2.10266e-17
BNC1	18.6036	4.21751	2.10652e-17
ITGB7	2.84988	1.5109	2.16208e-17
SH2B3	2.12611	1.08821	2.47767e-17
GIMAP4	2.56055	1.35645	2.63791e-17
KRT20	0.0255492	-5.29058	2.64189e-17
CYTSB	3.17136	1.6651	2.84978e-17
CTSS	2.57476	1.36444	2.92365e-17
SBNO2	1.64695	0.7198	2.97812e-17
ARHGEF10L	0.46149	-1.11563	3.06859e-17
TMC8	2.58466	1.36997	3.37777e-17
CORO1C	1.92663	0.946081	3.40325e-17
TBX3	0.180012	-2.47384	3.42305e-17
VIPR1	0.191108	-2.38754	3.44446e-17
UBE2Z	1.36196	0.445683	3.53891e-17
ZNF799	0.507837	-0.977563	3.62201e-17
KIR3DL2	2.89826	1.53519	3.73868e-17
MYCL1	0.2116	-2.24059	3.90963e-17
PRKCQ	5.33872	2.41649	3.97856e-17
NUAK2	3.09201	1.62854	4.09418e-17
CD109	5.09968	2.35041	4.19738e-17
TRPV2	2.87056	1.52133	4.22739e-17
IL31RA	3.86086	1.94892	4.29434e-17
LOC100129066	1.9711	0.978998	4.29434e-17
SSTR3	1.89116	0.919272	4.54656e-17
PEBP1	0.529063	-0.91849	4.55284e-17
SUFU	0.641911	-0.639556	4.75337e-17
TRIM47	2.71714	1.44209	4.87673e-17
TGM2	4.54889	2.18552	4.98021e-17
C17orf60	3.68269	1.88076	5.11503e-17
NSUN6	0.505062	-0.985469	5.39225e-17
F3	5.25031	2.3924	5.74387e-17
RAB31	2.92198	1.54695	5.86643e-17
CEACAM3	2.65041	1.40621	6.30936e-17
MFI2	6.69972	2.7441	6.35562e-17
MMEL1	0.203075	-2.29992	6.41735e-17
CAPN5	0.242097	-2.04634	6.58382e-17
TMPRSS2	0.0690759	-3.85567	6.59055e-17
CDK6	3.81382	1.93124	6.64369e-17
TNFSF14	2.70851	1.4375	6.64369e-17
TTC3	0.601973	-0.732229	6.64369e-17
C13orf18	4.30172	2.10491	6.80573e-17
VNN1	5.21796	2.38349	6.92766e-17
ACP2	1.68974	0.7568	6.93734e-17
C11orf17	1.73371	0.793863	7.00914e-17
LGALS9C	3.0676	1.61711	7.03852e-17
ZNF436	0.474923	-1.07423	7.06145e-17
CD72	3.31161	1.72753	7.1003e-17
MYO7A	3.15738	1.65873	7.1003e-17
LOC606724	2.91902	1.54548	7.18385e-17
GLB1L2	0.150166	-2.73537	7.61469e-17
C9orf30	1.73836	0.797724	7.89363e-17
GPR141	2.57972	1.36721	8.02845e-17
IL1R2	5.37369	2.42591	8.07798e-17
FCRL3	4.34741	2.12016	8.08699e-17
PPFIBP2	0.290082	-1.78547	8.60919e-17
FBXO6	1.91166	0.934823	8.68742e-17
PRDM1	2.49978	1.3218	8.90752e-17
P2RX7	3.48059	1.79933	8.90752e-17
WHSC2	0.674086	-0.568995	9.29853e-17
NCOA7	2.29232	1.19681	9.33413e-17
ISYNA1	0.325778	-1.61804	9.97397e-17
MARCO	8.21116	3.03759	1.00249e-16
CSF2RA	4.3936	2.1354	1.00757e-16
PARP15	3.34949	1.74394	1.01244e-16
LITAF	1.82314	0.866429	1.02157e-16
PDE4B	3.25788	1.70393	1.04531e-16
ACTB	1.63718	0.711212	1.06282e-16
GPRIN3	2.83036	1.50099	1.18278e-16
ADAD2	0.297667	-1.74823	1.18823e-16
ANKRD46	0.495844	-1.01204	1.33894e-16
MAP4K3	0.561719	-0.832079	1.39312e-16
SBK1	0.185175	-2.43304	1.40986e-16
JAK3	2.51541	1.33079	1.40986e-16
XIRP1	5.29099	2.40354	1.45486e-16
LOC96610	5.79782	2.53551	1.45883e-16
FLJ45983	0.105595	-3.24338	1.45984e-16
GLS2	0.276	-1.85726	1.51643e-16
BCAT2	0.38145	-1.39043	1.53014e-16
DTHD1	2.84802	1.50996	1.53036e-16
ADAM19	4.25446	2.08898	1.53036e-16
FTSJD2	1.40586	0.49145	1.56946e-16
HLA-L	2.61532	1.38699	1.6255e-16
TNFAIP8	1.89659	0.923405	1.64359e-16
GIMAP5	2.86637	1.51923	1.66303e-16
TEAD4	2.9935	1.58183	1.7531e-16
GPR34	3.24749	1.69932	1.78972e-16
PRAM1	3.10779	1.63589	1.89976e-16
CDH23	0.181249	-2.46396	1.96778e-16
RCSD1	2.98892	1.57962	1.98332e-16
NPC1	1.86195	0.896813	1.98731e-16
CBR4	0.564828	-0.824116	2.03236e-16
ACVR2A	0.513994	-0.960178	2.13243e-16
PTPRJ	2.41114	1.26971	2.21554e-16
OSM	3.85998	1.94859	2.22033e-16
KIAA0922	2.725	1.44626	2.22479e-16
G0S2	4.73147	2.24229	2.3922e-16
CYP4F22	0.0851854	-3.55325	2.40251e-16
CD69	4.43077	2.14756	2.41987e-16
PLA2G7	3.55257	1.82886	2.43927e-16
ACOT9	2.12694	1.08878	2.49906e-16
ACTR3B	0.559382	-0.838095	2.54227e-16
KLRC4	2.67577	1.41996	2.58555e-16
RHBG	0.110337	-3.18002	2.65799e-16
CHST11	4.11591	2.04121	2.91819e-16
GLT25D1	1.65416	0.726101	2.99823e-16
RELT	1.91024	0.933752	3.13607e-16
FGFBP3	0.422989	-1.24131	3.26354e-16
RAB40C	0.580499	-0.784635	3.33025e-16
SGTB	2.12245	1.08573	3.33587e-16
PIM2	2.17017	1.11781	3.35074e-16
ACTBL2	3.78374	1.91981	3.4628e-16
C20orf118	2.61434	1.38645	3.4628e-16
CACNB3	0.489622	-1.03026	3.53437e-16
PHF19	2.16513	1.11446	3.53675e-16
TTC23L	0.278946	-1.84194	3.67941e-16
MAGI1	0.352028	-1.50624	3.92683e-16
SFRS2B	0.663204	-0.592476	3.95588e-16
NAPSB	4.57832	2.19482	3.9632e-16
MGC29506	7.42373	2.89214	4.09024e-16
BAMBI	0.18167	-2.46061	4.14358e-16
PLA2G6	0.455833	-1.13342	4.14358e-16
DNAL4	0.596746	-0.74481	4.36768e-16
KLHL5	2.41915	1.2745	4.51724e-16
PCBD1	0.535952	-0.899825	4.81211e-16
SLC30A2	0.0764749	-3.70887	4.89936e-16
TNFRSF4	2.87994	1.52604	5.16707e-16
CXCL1	7.61737	2.92929	5.19485e-16
UPK2	0.0472044	-4.40494	5.2001e-16
LOC80054	0.329977	-1.59956	5.33216e-16
CEBPB	2.1206	1.08447	5.40541e-16
ZNF33A	0.615018	-0.701299	5.45621e-16
SPRED2	0.564748	-0.824321	5.47714e-16
OR7E91P	0.177164	-2.49685	5.76048e-16
GTF2IP1	0.663233	-0.592413	6.09357e-16
PARP10	1.83517	0.875914	6.17543e-16
CCL3L1	4.15723	2.05562	6.28631e-16
CCR4	3.54274	1.82486	6.53107e-16
TDH	0.193852	-2.36697	6.73857e-16
LOC646851	0.372075	-1.42634	6.80638e-16
AKAP5	2.3919	1.25816	6.84047e-16
CD40LG	3.02272	1.59585	6.88225e-16
ATP8B4	2.56861	1.36099	7.09669e-16
LOC149134	0.207279	-2.27036	7.2064e-16
PSMA1	1.38703	0.472	7.24701e-16
WDR6	0.604063	-0.72723	7.26027e-16
DOK3	2.52142	1.33424	7.391e-16
RASGEF1B	3.18831	1.67279	7.46058e-16
MTHFD1L	1.92172	0.942395	7.5405e-16
CDCP1	2.44245	1.28833	8.15239e-16
TRAF3	1.65001	0.722475	8.30339e-16
CLEC6A	1.96861	0.97718	8.30339e-16
SYNGR1	0.300146	-1.73626	8.57826e-16
2022-03-01	2.22969	1.15684	8.57826e-16
SLC9A4	0.114805	-3.12274	8.82396e-16
TMCC3	2.72357	1.4455	9.13171e-16
GSDMC	7.2537	2.85872	9.67794e-16
GPD1L	0.359216	-1.47708	1.07623e-15
S1PR4	2.89356	1.53284	1.08828e-15
TNFRSF6B	3.91583	1.96932	1.09565e-15
TOP2B	0.528009	-0.921365	1.17111e-15
ZNF253	0.463633	-1.10895	1.24197e-15
ZNF627	0.60988	-0.713402	1.27069e-15
IL22RA2	3.83189	1.93806	1.29085e-15
BCAS1	0.0855781	-3.54661	1.29085e-15
SLC11A1	2.78627	1.47833	1.3572e-15
GNL3	0.604573	-0.726011	1.42761e-15
CAV2	2.77007	1.46992	1.42953e-15
DENND1A	1.5797	0.659651	1.60355e-15
UPK3A	0.0523724	-4.25505	1.60482e-15
PIP4K2A	1.83684	0.877228	1.66478e-15
FKBP15	1.43384	0.519888	1.74336e-15
LOC283392	0.101454	-3.3011	1.79938e-15
VSIG2	0.0729539	-3.77687	1.92262e-15
C7orf46	0.361043	-1.46976	2.04532e-15
ZNF709	0.509723	-0.972215	2.06606e-15
CLEC10A	4.47808	2.16288	2.0813e-15
CSF2	4.66282	2.2212	2.22015e-15
LILRA1	2.341	1.22713	2.31169e-15
VMO1	3.27947	1.71346	2.37714e-15
C6orf106	1.53418	0.617469	2.42285e-15
RPS6KA4	1.64829	0.720971	2.46846e-15
FLI1	2.28299	1.19093	2.5099e-15
P4HTM	0.436684	-1.19534	2.58255e-15
CCNL2	0.513126	-0.962614	2.65177e-15
IRAK1	1.70416	0.769059	2.78065e-15
FMO9P	0.0685925	-3.86581	2.90708e-15
OSMR	4.20103	2.07074	2.97709e-15
CD200R1	2.63236	1.39636	3.03913e-15
DEGS2	0.160393	-2.64032	3.10184e-15
DSE	2.27465	1.18564	3.62729e-15
TNFSF8	3.14313	1.6522	3.63301e-15
GNG2	2.58133	1.36811	3.75674e-15
NCRNA00162	7.6679	2.93883	3.81976e-15
GPR77	3.10466	1.63443	3.82507e-15
HS3ST6	0.122004	-3.035	3.96645e-15
CXorf65	2.21561	1.14771	4.1248e-15
KLHDC7A	0.0748372	-3.7401	4.14253e-15
ZNF74	0.60782	-0.718283	4.20984e-15
AGTRAP	1.73243	0.792794	4.45961e-15
ACVR2B	0.476211	-1.07033	4.6666e-15
MOV10	1.55089	0.633098	4.75751e-15
SH2B1	0.601533	-0.733284	4.79338e-15
KDM4B	0.672481	-0.572435	5.18869e-15
KIAA0895L	0.521743	-0.93859	5.29349e-15
LOC284900	0.538403	-0.893243	5.43488e-15
ERAP1	1.86877	0.902088	5.61074e-15
TLE2	0.246664	-2.01938	5.78828e-15
GIMAP1	2.50788	1.32647	6.1224e-15
PIK3C2B	0.425992	-1.2311	6.33936e-15
KLF15	0.24307	-2.04056	6.52396e-15
SLFN11	3.08884	1.62707	7.13384e-15
NUDT13	0.496543	-1.01001	7.48593e-15
PLCE1	0.251402	-1.99193	7.55206e-15
IP6K2	0.603336	-0.728967	7.56779e-15
ZNF440	0.423371	-1.24001	7.61397e-15
LOC100128640	0.41516	-1.26826	7.65209e-15
RIMKLA	0.235881	-2.08387	7.65209e-15
LRRC42	1.66813	0.738233	7.65209e-15
GTF2IRD2	0.543478	-0.879708	7.654e-15
C2orf18	1.46633	0.552211	7.80355e-15
CHI3L1	8.56163	3.09788	7.80355e-15
TGFBR3	0.31552	-1.6642	7.95108e-15
CCL22	3.62892	1.85954	8.11669e-15
LRRC8C	2.01487	1.01069	8.13263e-15
MEX3A	0.306912	-1.7041	8.17917e-15
LILRA2	2.71338	1.44009	8.18463e-15
DNAJA1	1.70773	0.772076	8.32624e-15
LPXN	2.5169	1.33165	8.63787e-15
ARPC1B	1.71424	0.777566	8.70013e-15
ZNF69	0.360281	-1.47281	8.97343e-15
IL10	3.12963	1.64599	9.08636e-15
TNFRSF8	3.35836	1.74776	9.24161e-15
PPARG	0.189545	-2.39938	9.24161e-15
STAP1	3.45098	1.78701	9.24161e-15
MMP9	7.1328	2.83447	9.24161e-15
FAM40B	2.6867	1.42584	9.64326e-15
NT5E	4.27243	2.09506	9.76344e-15
SCNN1G	0.09566	-3.38594	9.85136e-15
NEK6	2.7267	1.44715	1.04558e-14
C9orf46	1.8436	0.882524	1.05668e-14
KIR2DS4	2.79844	1.48462	1.06914e-14
TNF	3.60305	1.84922	1.06914e-14
BCKDHB	0.521506	-0.939245	1.0939e-14
ARVCF	0.434892	-1.20127	1.13004e-14
PLCD1	0.375767	-1.41209	1.13514e-14
SIRPB1	3.24257	1.69714	1.1685e-14
IL16	2.30011	1.20171	1.1772e-14
PGAP1	0.451341	-1.14771	1.19127e-14
ZNF652	0.667893	-0.58231	1.19768e-14
CELF2	3.04864	1.60817	1.2181e-14
LAMA3	7.42854	2.89308	1.2358e-14
SIRPB2	3.08801	1.62668	1.26234e-14
CDV3	1.51853	0.602672	1.31154e-14
PLIN3	1.62097	0.69686	1.32565e-14
TRAF1	2.32456	1.21696	1.35565e-14
GPR18	2.73801	1.45313	1.43144e-14
ANXA2	2.10233	1.07199	1.45678e-14
SAT1	2.03202	1.02291	1.47854e-14
C20orf141	3.30689	1.72548	1.48472e-14
NCK1	1.73215	0.792568	1.4852e-14
KLHL6	3.16328	1.66142	1.49561e-14
TLR3	3.11959	1.64136	1.53504e-14
CCL20	7.23577	2.85515	1.54415e-14
TGFBI	4.06861	2.02454	1.55922e-14
ZBTB7C	0.184081	-2.44159	1.56597e-14
VEGFC	2.85552	1.51375	1.58722e-14
TNIP1	1.53709	0.620206	1.61266e-14
FCGR2C	3.21037	1.68274	1.67639e-14
C10orf129	0.122841	-3.02513	1.70311e-14
LOC541471	2.46738	1.30298	1.70311e-14
IL1RAP	2.67709	1.42067	1.70856e-14
ARHGAP22	2.79895	1.48489	1.72006e-14
ZSCAN2	0.591089	-0.758553	1.82161e-14
FSTL4	0.133929	-2.90046	1.87855e-14
CTSC	2.38001	1.25097	1.88552e-14
KRTAP5-10	0.279432	-1.83943	1.89682e-14
KCNA3	2.9544	1.56286	1.89962e-14
LNX1	0.399053	-1.32535	1.94679e-14
CYTH1	1.53414	0.617432	1.98479e-14
ZNF254	0.430466	-1.21603	2.00922e-14
KRTAP5-8	0.266969	-1.90525	2.02108e-14
ACPL2	0.477156	-1.06747	2.03736e-14
MEI1	3.7495	1.9067	2.06841e-14
PSTPIP2	2.12785	1.0894	2.07658e-14
MST1P2	0.370309	-1.4332	2.1013e-14
BAIAP3	0.249952	-2.00027	2.11677e-14
FAM3B	0.0730151	-3.77566	2.20658e-14
CD300E	2.41555	1.27235	2.21728e-14
CTSL1	2.42495	1.27796	2.28455e-14
HTATIP2	1.69181	0.758568	2.3054e-14
LOC202781	0.49025	-1.02841	2.34265e-14
INPP5A	0.607229	-0.719688	2.41216e-14
RALB	1.53633	0.619488	2.48356e-14
ZNF321	0.396764	-1.33365	2.52958e-14
PPP1R16B	2.57778	1.36613	2.68129e-14
LOC100101266	0.392405	-1.34958	2.75559e-14
SNX10	2.56792	1.3606	2.83723e-14
GCFC1	0.606172	-0.722202	2.89964e-14
SLC16A1	4.78798	2.25942	2.94426e-14
AGAP11	0.189492	-2.39979	2.98547e-14
KRTAP5-9	0.199244	-2.32739	3.03176e-14
INSR	0.57728	-0.792657	3.07657e-14
LYPD5	2.81579	1.49354	3.08896e-14
ACADSB	0.437811	-1.19162	3.13659e-14
DEGS1	2.26555	1.17986	3.14626e-14
PLEKHH1	0.338997	-1.56066	3.15689e-14
PGPEP1	0.500566	-0.998367	3.18709e-14
KLF10	2.00965	1.00694	3.32385e-14
FAM55C	2.02762	1.01979	3.40289e-14
PHLPP1	0.531908	-0.910751	3.47862e-14
CCR6	2.41202	1.27024	3.5341e-14
OR13A1	0.237492	-2.07405	3.57108e-14
IL12B	2.19075	1.13143	3.61661e-14
AXL	3.14458	1.65287	3.6698e-14
GOLGA6L9	0.441878	-1.17828	3.68149e-14
SETX	1.45392	0.539943	3.77822e-14
C8orf47	0.178692	-2.48445	3.86091e-14
CSF2RB	3.21281	1.68383	3.86658e-14
C8orf55	0.412377	-1.27796	3.93479e-14
LGALS9	2.75177	1.46036	3.9978e-14
MMP15	0.469521	-1.09074	4.26667e-14
UBE2F	1.52362	0.607501	4.31843e-14
ACP6	0.445485	-1.16655	4.31843e-14
RALGPS1	0.375489	-1.41316	4.43354e-14
NR3C1	2.55449	1.35304	4.55185e-14
VSIG10	0.455744	-1.1337	5.41781e-14
APOC2	4.10102	2.03598	5.6517e-14
PLEKHM1P	0.587061	-0.768418	5.83534e-14
REC8	2.44534	1.29004	5.90289e-14
ANXA2P2	2.13545	1.09454	6.18379e-14
C2orf15	0.396452	-1.33478	6.25346e-14
CXCL3	4.52503	2.17793	6.46804e-14
SLC22A4	2.25702	1.17442	6.54296e-14
JAZF1	2.17679	1.1222	6.55118e-14
MMP12	7.27531	2.86301	6.78463e-14
ARPC5L	1.54499	0.627601	6.89632e-14
C1orf200	1.86568	0.899705	7.03466e-14
SRRM5	0.521225	-0.940021	7.27188e-14
ZNF763	0.449409	-1.1539	7.28416e-14
TMEM176B	3.31413	1.72863	7.40946e-14
SPINK1	0.0339335	-4.88115	7.42571e-14
ZNF248	0.620045	-0.689555	7.49942e-14
CAPS	0.212404	-2.23512	7.58596e-14
TMEM178	0.26888	-1.89497	7.61509e-14
CNGA1	0.200528	-2.31812	7.64285e-14
DCAKD	0.614577	-0.702334	7.73367e-14
TNC	4.98521	2.31765	8.23002e-14
PLEKHA6	0.342462	-1.54598	8.27079e-14
TBX2	0.235073	-2.08882	8.28059e-14
GDF7	0.362906	-1.46233	8.30246e-14
ZBTB8B	0.216295	-2.20893	8.60469e-14
TARS	1.69208	0.758801	8.61149e-14
PLA2G2D	6.54746	2.71093	8.61149e-14
GRID2IP	0.352181	-1.50561	8.92712e-14
ABCD3	0.526195	-0.926331	9.20925e-14
SETD4	0.645057	-0.632502	9.34591e-14
ZNF439	0.364849	-1.45463	9.78399e-14
KYNU	3.97208	1.9899	9.88095e-14
SETMAR	0.583159	-0.778038	9.91552e-14
PCGF3	0.602271	-0.731515	1.01344e-13
PAN2	0.538681	-0.892498	1.02222e-13
ZNF692	0.541674	-0.884502	1.02912e-13
CHST15	3.57055	1.83615	1.04709e-13
MT1X	3.60224	1.84889	1.05025e-13
CXCL5	7.9976	2.99957	1.07636e-13
SAMD10	0.459551	-1.1217	1.11588e-13
EMR4P	2.23777	1.16206	1.11794e-13
PIK3CG	3.08832	1.62682	1.12311e-13
SULT2A1	0.0838551	-3.57596	1.13296e-13
FCGR2B	3.49699	1.80611	1.16683e-13
WFS1	0.562117	-0.831058	1.17349e-13
ARNTL	1.8074	0.853916	1.24026e-13
RHBDF2	1.66975	0.739629	1.24128e-13
GATA3	0.220898	-2.17855	1.24822e-13
PLXNB1	0.511622	-0.966849	1.26255e-13
PTCRA	2.09884	1.06959	1.28208e-13
KATNAL1	2.76905	1.46939	1.30127e-13
PTAFR	2.88107	1.5266	1.31623e-13
CHN2	0.349637	-1.51607	1.34728e-13
ARHGAP15	3.07236	1.61935	1.37789e-13
FGD6	2.1365	1.09525	1.4001e-13
LDHA	1.9742	0.981269	1.44105e-13
STAB1	2.4803	1.31051	1.49089e-13
IFT27	0.553679	-0.852877	1.5697e-13
CAV1	3.30485	1.72459	1.61299e-13
SAA4	3.52483	1.81755	1.63609e-13
INA	0.11656	-3.10085	1.63783e-13
IL20RB	5.57261	2.47835	1.6444e-13
HLA-J	2.66016	1.41151	1.64917e-13
CLCF1	2.79748	1.48413	1.67752e-13
MAP3K14	1.87278	0.90518	1.70904e-13
ZNF77	0.621227	-0.686807	1.71961e-13
ZNF20	0.658813	-0.602059	1.71961e-13
TOX	3.75912	1.9104	1.84718e-13
EPB41	0.556654	-0.845147	1.87087e-13
HSPA5	1.5119	0.596367	1.93561e-13
TBC1D3	0.514904	-0.957625	1.94655e-13
GRHL3	0.133383	-2.90636	1.95773e-13
AQP9	4.6587	2.21993	2.03521e-13
GBP7	1.9081	0.932139	2.08156e-13
CD163L1	3.22738	1.69037	2.22262e-13
TIAM1	0.448418	-1.15708	2.2277e-13
METTL7A	0.291638	-1.77775	2.29706e-13
PMAIP1	2.58733	1.37146	2.30224e-13
ULK3	0.641266	-0.641005	2.31796e-13
TEKT5	0.238087	-2.07044	2.37122e-13
IL29	2.08384	1.05924	2.4119e-13
PLAU	3.14721	1.65408	2.42144e-13
IFI27L2	2.66403	1.41361	2.44801e-13
PTGS1	4.44379	2.15179	2.47067e-13
KIAA0247	1.71235	0.775978	2.56163e-13
LY6E	3.22477	1.6892	2.64128e-13
CGN	0.249491	-2.00294	2.68473e-13
POLI	0.561282	-0.833203	2.80697e-13
FAM165B	0.65067	-0.620002	2.85589e-13
ACTR3	1.43432	0.520372	2.85882e-13
MCF2L	0.316332	-1.66049	2.87684e-13
TNNC1	0.151719	-2.72052	2.90987e-13
FAM3D	0.109594	-3.18977	2.92868e-13
CCNG2	0.504076	-0.988286	3.00909e-13
KIFC2	0.452392	-1.14436	3.03291e-13
PTRF	2.71659	1.44179	3.06889e-13
CACNA1I	0.181084	-2.46527	3.17075e-13
TCP11L1	2.03042	1.02178	3.22149e-13
SLFN5	2.30392	1.20409	3.28388e-13
GALNT10	2.0899	1.06343	3.28388e-13
2022-09-06	2.14999	1.10433	3.28745e-13
TNFRSF17	4.11366	2.04042	3.34131e-13
NRG1	5.55655	2.47419	3.36342e-13
SLC31A2	2.1397	1.09741	3.58744e-13
SCNN1B	0.115897	-3.10909	3.68936e-13
TRIM45	0.510589	-0.969764	3.86711e-13
PI4KAP1	0.387261	-1.36862	3.87453e-13
C1orf126	0.317344	-1.65588	3.91023e-13
TMEM171	3.71227	1.8923	3.93009e-13
SIGLEC11	2.65336	1.40782	4.01063e-13
MT1L	3.99757	1.99912	4.09169e-13
HMGA2	10.7939	3.43214	4.13829e-13
ANXA3	4.76662	2.25297	4.15327e-13
KIR3DL1	2.15319	1.10647	4.15503e-13
SOCS3	2.58038	1.36758	4.16295e-13
NDRG2	0.350297	-1.51335	4.16874e-13
TTC16	2.20226	1.13899	4.22952e-13
WDR52	0.428823	-1.22155	4.43684e-13
MSX2	0.26652	-1.90769	4.54522e-13
SS18L1	0.614491	-0.702537	4.75616e-13
FLT3	2.61768	1.38829	4.77972e-13
COTL1	1.89932	0.925483	4.80082e-13
LUC7L3	0.659746	-0.600018	4.82276e-13
SH3YL1	0.481257	-1.05512	4.84142e-13
LGALS2	3.91093	1.96751	4.89394e-13
LOC100130581	0.576178	-0.795413	5.06897e-13
CDK3	0.513541	-0.961449	5.10496e-13
KRT6A	27.7915	4.79657	5.25135e-13
C3	4.47449	2.16172	5.27165e-13
ARSJ	3.57039	1.83608	5.29186e-13
CEBPA	0.337935	-1.56518	5.43588e-13
PLEKHO2	1.74681	0.804723	5.47083e-13
TSPAN4	2.32309	1.21604	5.51047e-13
C2orf85	2.01078	1.00775	5.5806e-13
NFKB2	1.57229	0.652866	5.5806e-13
NT5DC2	0.536316	-0.898844	5.60598e-13
KRT6B	23.3717	4.54669	5.61625e-13
SOAT1	1.95335	0.965949	5.62597e-13
KCNC3	0.352623	-1.5038	5.9183e-13
BFSP2	2.09093	1.06415	6.13834e-13
TRANK1	1.89068	0.918906	6.22657e-13
FMO5	0.333896	-1.58253	6.25674e-13
ZNF84	0.598827	-0.73979	6.32333e-13
ZNF345	0.5356	-0.900773	6.3623e-13
SLC2A11	0.49719	-1.00813	6.48657e-13
SLC39A8	2.30158	1.20263	6.49869e-13
C2orf63	0.483217	-1.04926	6.56141e-13
LDB1	0.653488	-0.613767	6.56141e-13
ADAM11	0.339418	-1.55887	6.68887e-13
CCL23	2.9988	1.58439	6.68887e-13
NIPSNAP1	0.640916	-0.641792	6.71282e-13
TMEM156	2.88951	1.53083	6.71779e-13
C17orf100	0.583097	-0.778193	6.86818e-13
NT5C2	0.59251	-0.755088	7.00736e-13
CACNA2D2	0.413394	-1.27441	7.07534e-13
GGTA1	2.89129	1.53171	7.11767e-13
VRK2	1.52185	0.605826	7.14898e-13
VAV1	3.31319	1.72822	7.20572e-13
ACOXL	0.149245	-2.74424	7.2492e-13
ALDH4A1	0.467812	-1.096	7.85438e-13
TSPAN12	0.298474	-1.74432	7.91719e-13
USP30	0.701809	-0.510851	7.93519e-13
SORL1	0.271575	-1.88058	8.03395e-13
PPP1R9A	0.189696	-2.39824	8.12224e-13
BRWD1	0.658725	-0.602252	8.14187e-13
PDZD3	0.198998	-2.32918	8.15013e-13
NEXN	2.96317	1.56714	8.22432e-13
S100A5	0.272354	-1.87645	8.22537e-13
ACAA1	0.570312	-0.810178	8.35577e-13
RHPN1	0.315882	-1.66254	8.39306e-13
SRD5A1	1.97582	0.982454	8.87293e-13
DIAPH1	1.48747	0.572856	8.98305e-13
GPLD1	0.268865	-1.89505	8.98305e-13
MOBKL2A	1.48079	0.56637	9.11701e-13
KIAA0195	0.641741	-0.639938	9.32286e-13
TMEM97	0.331772	-1.59174	9.49603e-13
SLC14A1	0.0890398	-3.48941	9.81979e-13
FAM155B	0.194563	-2.36169	9.8783e-13
RRAS	2.06957	1.04933	9.92171e-13
ZNF792	0.508734	-0.975016	9.93707e-13
FREM2	0.096764	-3.36939	1.00064e-12
TTC8	0.643291	-0.636457	1.00517e-12
KCNAB2	2.32483	1.21712	1.00813e-12
RIN3	1.73049	0.791182	1.08422e-12
FZD3	0.533238	-0.907149	1.08478e-12
PRPS1	1.56725	0.648232	1.10602e-12
SLC44A3	0.38315	-1.38402	1.11226e-12
RAB32	2.09796	1.06899	1.11835e-12
ADAM6	8.03102	3.00558	1.11835e-12
ART3	2.73501	1.45155	1.12112e-12
FEZ2	1.39526	0.480529	1.18348e-12
MAX	1.32112	0.401766	1.22283e-12
DENND3	1.84665	0.884912	1.22335e-12
ZYX	1.64261	0.715987	1.24669e-12
CYTH2	0.682353	-0.551409	1.2511e-12
UBE4B	0.697498	-0.519739	1.27235e-12
WFDC13	0.293267	-1.76972	1.28643e-12
YWHAH	1.50085	0.585783	1.29424e-12
C2orf34	0.632227	-0.661486	1.33582e-12
MYLPF	0.402985	-1.3112	1.34054e-12
ATG3	1.33339	0.415096	1.34519e-12
TRHDE	0.143363	-2.80226	1.36068e-12
PSMA3	1.38124	0.465968	1.38189e-12
ACAP3	0.594188	-0.751009	1.45738e-12
HDAC9	3.62098	1.85638	1.5094e-12
SMARCE1	0.724136	-0.465667	1.55207e-12
ZNF14	0.633149	-0.659383	1.55347e-12
SCAND2	0.712109	-0.48983	1.55572e-12
TNFAIP6	4.34576	2.11961	1.58044e-12
SLC25A42	0.572918	-0.803598	1.59167e-12
KIAA1324L	0.533568	-0.906255	1.61717e-12
PCGF5	1.48572	0.571167	1.72236e-12
SH3BGRL2	0.397318	-1.33163	1.74485e-12
FAM104B	0.631443	-0.663275	1.74485e-12
RAB3A	0.553972	-0.852116	1.81597e-12
TMTC4	0.557467	-0.843041	1.83008e-12
BHMT	0.0765883	-3.70673	1.83069e-12
ZNF862	0.500562	-0.998378	1.90556e-12
CD97	1.95304	0.965723	1.90644e-12
KRT6C	18.6195	4.21874	1.93823e-12
GTF2IRD2B	0.477108	-1.06761	1.94306e-12
TXNDC9	1.46369	0.549607	1.94896e-12
MRPS10	1.4338	0.519845	1.98441e-12
ANKDD1A	0.497831	-1.00627	1.98872e-12
BCL3	1.81937	0.863438	2.00392e-12
CYB5A	0.39579	-1.33719	2.00661e-12
SLC2A5	3.2059	1.68073	2.03403e-12
CROCCL1	0.634848	-0.655517	2.05024e-12
PEX14	0.737896	-0.438511	2.05292e-12
GDPD1	0.44035	-1.18328	2.05924e-12
TPP1	1.62061	0.696537	2.05924e-12
KRT12	0.274829	-1.86339	2.15227e-12
AMPD3	1.76169	0.816958	2.16327e-12
FAM105B	1.51533	0.599634	2.16882e-12
DNAJC16	0.705836	-0.502595	2.17116e-12
NAMPT	1.88467	0.914314	2.22387e-12
ZNF711	0.326042	-1.61687	2.23161e-12
HKR1	0.656781	-0.606516	2.23286e-12
OGFR	1.49336	0.578561	2.29096e-12
NFIL3	1.87736	0.908702	2.34557e-12
SGK1	2.5948	1.37562	2.35345e-12
DRAM1	2.11697	1.082	2.39096e-12
RAB11A	0.671589	-0.57435	2.43047e-12
BTBD16	0.0805015	-3.63484	2.43127e-12
VNN3	3.29498	1.72027	2.43127e-12
MST1	0.415546	-1.26692	2.43258e-12
GPR176	3.17757	1.66792	2.44136e-12
C14orf73	3.85493	1.9467	2.46356e-12
GUCA2A	0.171638	-2.54256	2.4888e-12
CASP7	1.59295	0.671697	2.49655e-12
STX1B	2.65134	1.40672	2.53727e-12
JMJD7-PLA2G4B	0.525749	-0.927554	2.53727e-12
ZNF3	0.685127	-0.545557	2.56954e-12
NKTR	0.55905	-0.838951	2.60685e-12
SEMA4G	0.356654	-1.4874	2.62286e-12
TTC39B	2.29018	1.19546	2.705e-12
ZFP14	0.581595	-0.781913	2.72607e-12
ZNF513	0.65066	-0.620025	2.82288e-12
ZMYM2	0.642381	-0.638499	2.82646e-12
NEIL3	2.34244	1.22801	2.82901e-12
KMO	2.79555	1.48313	2.84632e-12
RNF128	0.186592	-2.42204	2.86564e-12
AKAP1	0.671561	-0.574411	2.93363e-12
IFI27L1	1.95326	0.965885	2.98729e-12
IDO2	2.25372	1.17231	2.98985e-12
ANXA2P1	2.15658	1.10875	3.00702e-12
PRPF4	1.4178	0.503658	3.02632e-12
PPP2R2D	0.700321	-0.513912	3.09301e-12
C6orf114	2.44866	1.29199	3.14285e-12
AMT	0.399518	-1.32367	3.14499e-12
IL18	2.31745	1.21254	3.16803e-12
ZNF491	0.503997	-0.988514	3.1701e-12
RAB11FIP3	0.643914	-0.63506	3.18608e-12
ACSBG1	0.236834	-2.07805	3.20891e-12
RTN1	3.0304	1.59951	3.2214e-12
SMAD6	0.370175	-1.43372	3.22206e-12
ZNF233	0.494455	-1.01609	3.31837e-12
ENGASE	0.507752	-0.977805	3.31837e-12
CECR4	0.516388	-0.953473	3.33598e-12
ZNF559	0.650444	-0.620503	3.33741e-12
SGK2	0.157787	-2.66395	3.34975e-12
ACTN1	2.09573	1.06746	3.44114e-12
TSPAN6	0.500655	-0.998112	3.49253e-12
MYO1B	2.35266	1.23429	3.51058e-12
IFFO1	2.32118	1.21486	3.51629e-12
RECQL	1.54828	0.630665	3.54307e-12
IFIT1B	1.48508	0.57054	3.5486e-12
CASP10	1.96714	0.9761	3.55902e-12
RNH1	1.43289	0.518928	3.61493e-12
FCRL5	5.03737	2.33267	3.63471e-12
FER1L4	0.160047	-2.64343	3.72176e-12
GFOD2	0.670497	-0.576698	3.74362e-12
ZNF664	0.66555	-0.58738	3.81604e-12
C9orf109	2.60648	1.3821	3.82501e-12
RPL22	0.719162	-0.475611	3.87454e-12
C3orf23	0.660042	-0.59937	3.88381e-12
BCAP29	1.40353	0.489056	3.90666e-12
CTSZ	1.83758	0.877806	3.91127e-12
CASS4	2.37339	1.24695	4.03918e-12
C12orf63	1.82906	0.871099	4.15056e-12
CYP3A5	0.153313	-2.70545	4.22418e-12
TXNDC2	1.81352	0.85879	4.32732e-12
NFKBIE	1.62966	0.70457	4.53193e-12
MTMR3	0.678028	-0.560584	4.54643e-12
CRYZL1	0.697348	-0.52005	4.85176e-12
NINJ1	1.73261	0.79295	4.88591e-12
IL12A	2.41826	1.27397	4.94111e-12
ARSI	5.02462	2.32901	4.94111e-12
GOLGA6L10	0.480084	-1.05864	4.96213e-12
SNHG9	0.435349	-1.19975	4.96945e-12
TM4SF19	4.85953	2.28082	5.16385e-12
ANK1	3.41103	1.77021	5.2109e-12
WDFY3	0.660825	-0.59766	5.2878e-12
KRTAP5-7	0.420107	-1.25117	5.44983e-12
ANKRD29	3.60227	1.84891	5.4503e-12
C17orf58	0.650721	-0.619889	5.51528e-12
LARGE	0.381784	-1.38917	5.6596e-12
PRKCB	3.26851	1.70863	5.70318e-12
SLC43A3	2.37397	1.2473	5.72463e-12
TINF2	1.3732	0.457539	5.91564e-12
PDIK1L	0.641064	-0.641461	5.94906e-12
HRC	0.381888	-1.38878	5.98566e-12
HIC2	0.390756	-1.35566	5.99489e-12
ST3GAL6	2.63066	1.39542	6.00835e-12
ALDH5A1	0.428882	-1.22135	6.02442e-12
NCRNA00173	2.40887	1.26836	6.08711e-12
RABEP2	0.612059	-0.708258	6.20216e-12
TICAM2	2.14472	1.10079	6.26381e-12
PABPC1	0.510864	-0.968989	6.30942e-12
PDXDC2	0.509713	-0.972242	6.30942e-12
OXGR1	0.233364	-2.09935	6.34783e-12
YPEL1	0.454969	-1.13616	6.40017e-12
LYPD6	0.323982	-1.62601	6.41307e-12
ZNF518A	0.590835	-0.759174	6.48848e-12
PNRC2	0.707627	-0.498939	6.68097e-12
MYO5A	2.10185	1.07166	6.68301e-12
GTF2IRD2P1	0.507994	-0.977118	6.70161e-12
GPRC5C	0.274122	-1.86711	6.70541e-12
CABP1	0.359267	-1.47687	6.83605e-12
NKPD1	0.360127	-1.47342	6.86775e-12
PPM1L	0.423717	-1.23883	6.91858e-12
C20orf96	0.501629	-0.995308	6.98648e-12
PLIN5	0.21387	-2.2252	7.04146e-12
DDX17	0.745665	-0.423401	7.04898e-12
SLC23A3	0.359685	-1.4752	7.13493e-12
AOC2	0.331727	-1.59193	7.29487e-12
ZNF571	0.579321	-0.787566	7.30813e-12
HAT1	1.44918	0.535237	7.41275e-12
STK17B	1.83983	0.879571	7.51346e-12
ACER2	0.230323	-2.11827	7.52199e-12
CD79A	5.38906	2.43003	7.73556e-12
TNFSF12-TNFSF13	4.63395	2.21224	7.79177e-12
ATP8B1	0.426159	-1.23054	7.88237e-12
MITD1	1.38786	0.47286	7.91366e-12
MYL12A	1.48096	0.566537	8.11935e-12
ERP44	1.39441	0.479659	8.15995e-12
PPM1J	2.55538	1.35354	8.17489e-12
MCFD2	1.52946	0.613021	8.17489e-12
LAMP2	1.71598	0.779036	8.28556e-12
GBP6	6.1991	2.63206	8.56791e-12
CCDC48	0.390435	-1.35684	8.65668e-12
ASCC2	0.585729	-0.771695	8.67035e-12
CD59	1.8162	0.860924	8.87534e-12
SGSM2	0.593452	-0.752797	8.97682e-12
AKAP8	0.760894	-0.394232	9.0992e-12
TRIT1	0.620094	-0.689442	9.178e-12
FBXO21	0.707563	-0.49907	9.20092e-12
TLR10	3.08032	1.62308	9.20877e-12
ETV2	0.514668	-0.958286	9.37074e-12
ANKRD23	0.53139	-0.912157	9.50719e-12
GALNT11	0.66245	-0.594116	9.55713e-12
SEMA5A	0.242596	-2.04337	9.68204e-12
MAP7D1	1.57166	0.652291	9.73521e-12
SDS	3.21235	1.68363	9.97794e-12
FAM59A	0.447683	-1.15945	1.00792e-11
ZNF433	0.525348	-0.928654	1.01058e-11
MPPED2	0.225352	-2.14975	1.02013e-11
C21orf59	0.705359	-0.503571	1.03515e-11
CHI3L2	4.80644	2.26497	1.03733e-11
COL9A1	0.253276	-1.98122	1.04054e-11
CIRBP	0.631578	-0.662967	1.04054e-11
RNF144B	2.24074	1.16398	1.12001e-11
LOC284837	0.238554	-2.06761	1.12813e-11
PAFAH2	0.697261	-0.520229	1.1432e-11
CCM2	1.52271	0.606637	1.14647e-11
KIAA0368	1.38084	0.465551	1.15091e-11
VENTX	2.52267	1.33495	1.1519e-11
IGSF21	3.09469	1.6298	1.17809e-11
PSMA2	1.35414	0.437377	1.20148e-11
SCN5A	0.222261	-2.16968	1.20814e-11
GFOD1	2.37102	1.24551	1.2273e-11
RAB40B	0.599779	-0.737498	1.23999e-11
GIMAP7	2.2463	1.16755	1.24301e-11
PRDM2	0.711263	-0.491545	1.24674e-11
VSNL1	5.88115	2.5561	1.25164e-11
ORAI1	1.53813	0.621181	1.2523e-11
ID4	0.299586	-1.73896	1.26677e-11
DLEC1	0.381533	-1.39012	1.26677e-11
CD44	2.765	1.46728	1.27186e-11
ZNF737	0.249048	-2.00551	1.2831e-11
LIPE	0.394098	-1.34337	1.32113e-11
SLC29A3	0.48207	-1.05269	1.32145e-11
PI3	15.1131	3.91773	1.33908e-11
C9orf110	2.87545	1.52379	1.35421e-11
CPAMD8	0.294645	-1.76295	1.35421e-11
LOC113230	0.403494	-1.30938	1.37777e-11
ZMYND8	0.601617	-0.733084	1.39835e-11
KIF5C	0.269491	-1.89169	1.40027e-11
NPRL2	0.664295	-0.590104	1.42462e-11
HSD11B1L	0.526208	-0.926294	1.42495e-11
GUK1	1.44575	0.531815	1.50043e-11
LOC646471	0.497742	-1.00653	1.52158e-11
CXCR5	3.25942	1.70461	1.52158e-11
PICK1	0.670749	-0.576155	1.55783e-11
NTRK1	2.3223	1.21556	1.56297e-11
PI4KAP2	0.386243	-1.37242	1.63229e-11
CCDC141	2.09846	1.06933	1.63236e-11
SSR3	1.36458	0.44846	1.64813e-11
MAPT	0.331189	-1.59427	1.67205e-11
ZNF605	0.69039	-0.534517	1.72248e-11
IFNGR1	1.62987	0.704754	1.72382e-11
SPHK2	0.591258	-0.758139	1.76336e-11
LIMD1	0.643571	-0.635828	1.84901e-11
IVD	0.639302	-0.64543	1.87546e-11
TRIM24	0.496456	-1.01026	1.88575e-11
RHEBL1	2.21792	1.14921	1.90458e-11
HS6ST3	0.130882	-2.93366	1.91006e-11
IGJ	5.86905	2.55313	1.91664e-11
GMPS	1.47416	0.559896	1.92821e-11
SARM1	0.431478	-1.21264	1.99515e-11
LACTB	1.45937	0.545346	1.99912e-11
ADA	2.56712	1.36015	2.02048e-11
ACIN1	0.772375	-0.372627	2.0216e-11
NBPF1	0.592809	-0.754361	2.0216e-11
ZNF552	0.48217	-1.05239	2.0501e-11
ZNF480	0.646461	-0.629364	2.06305e-11
SLC19A2	0.526949	-0.924264	2.10349e-11
DENND1C	1.85833	0.894005	2.10443e-11
FXYD4	0.132987	-2.91065	2.12199e-11
DTX4	0.446573	-1.16303	2.12199e-11
GGA1	0.698528	-0.51761	2.15043e-11
SSH3	0.468511	-1.09384	2.16457e-11
CDKN3	1.94194	0.957497	2.19114e-11
CD244	3.03405	1.60125	2.19523e-11
C3orf35	0.486674	-1.03897	2.21002e-11
RNF114	1.34397	0.426504	2.25233e-11
TMEM194B	1.63922	0.713012	2.26001e-11
KIAA1244	0.302255	-1.72616	2.26001e-11
ACSM3	0.246535	-2.02013	2.28604e-11
STK10	1.5818	0.661566	2.29197e-11
CRH	0.0785014	-3.67114	2.29197e-11
SPOCK2	2.58966	1.37276	2.29197e-11
EXTL2	0.662557	-0.593884	2.34748e-11
BTNL9	0.298544	-1.74398	2.39945e-11
PSMB2	1.33902	0.421176	2.4342e-11
SUDS3	0.716964	-0.480027	2.44488e-11
PCP2	0.352515	-1.50424	2.45112e-11
EXOC7	0.754418	-0.406563	2.45155e-11
C6orf134	0.598958	-0.739474	2.46198e-11
ZFP62	0.664374	-0.589934	2.47441e-11
RSAD1	0.683436	-0.549121	2.47487e-11
IL27RA	2.44305	1.28868	2.51231e-11
SRC	0.562071	-0.831177	2.52311e-11
SCUBE2	0.156891	-2.67217	2.53204e-11
GPX8	2.393	1.25882	2.57088e-11
ZNF682	0.36522	-1.45316	2.60673e-11
SH2D5	4.06358	2.02275	2.62638e-11
PTP4A1	1.779	0.831068	2.63768e-11
DHX58	1.77384	0.826876	2.67345e-11
C12orf47	0.693405	-0.52823	2.74173e-11
PSMA5	1.36457	0.448447	2.74734e-11
PSCA	0.072625	-3.78339	2.78852e-11
NEURL3	3.52511	1.81767	2.79288e-11
PWWP2B	0.569773	-0.81154	2.79868e-11
COPZ2	2.74715	1.45794	2.79964e-11
CAB39	1.48381	0.569308	2.82784e-11
OTUD1	1.76408	0.818912	2.83042e-11
GOLT1A	0.209345	-2.25604	2.86296e-11
MYT1	0.147308	-2.76309	2.88941e-11
USP46	0.611356	-0.709916	2.90685e-11
TET3	0.593872	-0.751777	3.02171e-11
NYNRIN	0.404229	-1.30676	3.0285e-11
TMEM205	0.626754	-0.67403	3.07165e-11
ELOVL6	0.488775	-1.03276	3.07268e-11
LRBA	0.640561	-0.642593	3.1053e-11
EXOSC3	1.5221	0.606063	3.16139e-11
PP14571	0.179796	-2.47556	3.21638e-11
DDX24	1.35493	0.438214	3.22282e-11
NPAS2	0.433746	-1.20508	3.22642e-11
PLD4	3.24132	1.69658	3.25993e-11
EXT1	1.8309	0.872555	3.2642e-11
RNF186	0.221202	-2.17656	3.282e-11
ABAT	0.330794	-1.59599	3.30687e-11
MAGIX	0.378453	-1.40181	3.33177e-11
TMSB10	1.76997	0.823724	3.35233e-11
MTMR4	0.661785	-0.595565	3.41422e-11
PHF15	1.85093	0.888247	3.41446e-11
PLA2G4F	0.235375	-2.08697	3.47208e-11
FBXO39	2.37525	1.24808	3.53391e-11
ZNF333	0.619661	-0.690449	3.53654e-11
SARDH	2.55014	1.35058	3.60794e-11
KIAA0892	0.731891	-0.450299	3.68019e-11
TRIM33	0.691349	-0.532513	3.71517e-11
KCNRG	0.538127	-0.893981	3.81685e-11
MPST	0.597575	-0.742808	3.84217e-11
TIA1	0.651528	-0.618102	3.8504e-11
C22orf32	0.649311	-0.623017	3.8556e-11
UBLCP1	1.46843	0.554274	3.86519e-11
CAMK4	2.55057	1.35082	3.86519e-11
SPTA1	2.18328	1.1265	3.92375e-11
ACAD10	0.707243	-0.499723	3.92485e-11
COQ2	1.48525	0.570706	3.92965e-11
ZNF44	0.503691	-0.989388	3.95477e-11
TH1L	0.734435	-0.445293	3.98428e-11
RIC8A	1.35778	0.441246	3.99028e-11
ITPR3	1.78793	0.838294	4.01701e-11
FLJ40330	2.99028	1.58028	4.02577e-11
LRTOMT	0.656321	-0.607526	4.06362e-11
CYP4F12	0.14018	-2.83464	4.07733e-11
ADAMTS19	0.306329	-1.70685	4.1185e-11
RFTN1	2.04687	1.03342	4.14212e-11
BMP3	0.102153	-3.29119	4.22885e-11
PPIL1	1.42957	0.515578	4.29924e-11
CECR2	0.197417	-2.34068	4.40776e-11
KIAA1107	0.567135	-0.818237	4.44252e-11
AP1S2	1.78879	0.838984	4.46999e-11
SGMS2	2.18634	1.12852	4.5004e-11
MFNG	2.23135	1.15792	4.65115e-11
FUK	0.649918	-0.62167	4.67572e-11
MAPK8IP3	0.543754	-0.878974	4.67572e-11
NFKB1	1.49133	0.576601	4.73606e-11
ERBB3	0.352499	-1.50431	4.77118e-11
RAB11FIP4	0.477923	-1.06515	4.85822e-11
CYP4F8	0.0758205	-3.72127	4.9865e-11
CDC14A	0.571835	-0.806329	4.99368e-11
GDF9	0.531926	-0.910702	5.01301e-11
SLC22A17	0.446031	-1.16478	5.01373e-11
IL4R	1.7956	0.844467	5.15025e-11
DIP2A	0.689152	-0.537105	5.17031e-11
MAMLD1	2.25912	1.17576	5.17031e-11
CREB5	2.43807	1.28574	5.17031e-11
SLC5A7	0.207008	-2.27224	5.19471e-11
ZNF738	0.501588	-0.995425	5.20528e-11
PLCB2	2.42454	1.27771	5.21907e-11
NARF	0.652096	-0.616844	5.24564e-11
SH2D2A	2.09273	1.06539	5.24828e-11
FAM118A	0.576745	-0.793994	5.36776e-11
RAB39	2.21793	1.14922	5.37294e-11
RAPGEF1	1.55078	0.632996	5.38966e-11
C19orf28	1.58153	0.661323	5.39639e-11
AKAP8L	0.719706	-0.47452	5.44801e-11
KLHL24	0.610457	-0.712038	5.48756e-11
ANP32B	1.50361	0.588431	5.50551e-11
LOC90246	0.366495	-1.44813	5.58291e-11
SPIB	4.09766	2.0348	5.58499e-11
FOXD1	5.24358	2.39055	5.64384e-11
GLTSCR1	0.712561	-0.488915	5.83703e-11
LOC284440	0.533729	-0.905821	5.88379e-11
ZNF780B	0.630519	-0.665388	6.05621e-11
ATP6V1B2	1.44327	0.529339	6.05621e-11
TRIM15	2.93074	1.55126	6.05621e-11
TSNARE1	0.600527	-0.735699	6.05662e-11
TRIM36	2.91567	1.54383	6.09928e-11
SAMD13	0.378673	-1.40097	6.24896e-11
GTSF1L	1.57223	0.652811	6.28094e-11
SUCNR1	2.35403	1.23513	6.2872e-11
CCL2	2.8822	1.52717	6.32741e-11
ZNF554	0.643975	-0.634923	6.35555e-11
ATXN7L2	0.598766	-0.739935	6.4281e-11
PSMD1	1.33676	0.418742	6.44184e-11
ITPRIP	1.83566	0.876298	6.52726e-11
HSD17B2	0.163489	-2.61273	6.63839e-11
FCAR	2.2254	1.15407	6.70096e-11
KIAA0040	1.77743	0.829791	6.77963e-11
FASN	0.56346	-0.827615	6.78994e-11
TMEM57	0.759421	-0.397028	6.8615e-11
BMP2K	1.81129	0.85702	6.86632e-11
SLC13A3	0.33215	-1.59009	6.99394e-11
LONRF1	0.599232	-0.738814	7.01456e-11
MT1H	3.5371	1.82257	7.04361e-11
SUGT1L1	0.531099	-0.912946	7.15903e-11
OSTM1	1.54225	0.625037	7.25321e-11
ERAP2	3.46069	1.79106	7.55949e-11
DNM1P35	0.528884	-0.918977	7.83559e-11
ESRP2	0.528344	-0.92045	7.90536e-11
CLK3	0.740344	-0.433733	8.06444e-11
TUBGCP6	0.67633	-0.5642	8.06444e-11
SMARCC2	0.734785	-0.444605	8.12279e-11
CLEC9A	2.11571	1.08114	8.25323e-11
ASB2	3.05149	1.60951	8.25323e-11
P2RY12	2.48429	1.31283	8.33007e-11
SYN2	0.270472	-1.88645	8.36687e-11
NEIL1	0.458584	-1.12474	8.46243e-11
PKD1L1	0.286489	-1.80345	8.54876e-11
C2orf89	3.56682	1.83464	8.60717e-11
C7orf55	0.605354	-0.72415	8.64805e-11
KIAA0652	1.44319	0.529262	8.70018e-11
TBC1D2	1.84324	0.882247	8.71834e-11
PTOV1	0.705256	-0.503781	8.87102e-11
C10orf116	0.223667	-2.16058	8.87102e-11
STOM	2.20456	1.14049	9.01675e-11
TM6SF1	1.85097	0.888279	9.06854e-11
TSEN2	0.610798	-0.711234	9.06854e-11
C20orf112	0.528431	-0.920214	9.21275e-11
FLNA	2.45296	1.29453	9.32245e-11
ZNF10	0.549516	-0.863767	9.4161e-11
CYSLTR2	2.31957	1.21386	9.50654e-11
PPP1R3C	0.274623	-1.86448	9.60112e-11
SGSM1	0.261347	-1.93596	9.67429e-11
RPSAP52	3.12634	1.64447	9.72275e-11
SGPL1	0.593986	-0.751499	9.76054e-11
FAM13A	0.469383	-1.09116	9.76054e-11
BRD1	0.734088	-0.445975	9.81336e-11
LIMK1	1.46617	0.552056	1.00893e-10
HSPA7	2.66802	1.41577	1.01796e-10
NRIP2	0.589297	-0.762932	1.04874e-10
WSB1	0.633521	-0.658536	1.07954e-10
SAMD12	0.346964	-1.52714	1.08178e-10
SRMS	0.307714	-1.70034	1.0845e-10
NANOS1	0.684534	-0.546807	1.10642e-10
EPN3	0.337338	-1.56773	1.11247e-10
S100A10	2.56804	1.36067	1.11755e-10
C10orf55	2.5855	1.37044	1.12079e-10
RILPL2	1.56492	0.646085	1.1214e-10
NADSYN1	0.5375	-0.895664	1.12948e-10
FMN1	2.95409	1.56271	1.13602e-10
SLC24A4	1.89217	0.920044	1.14229e-10
SYT12	4.03376	2.01212	1.14954e-10
CHADL	0.462377	-1.11286	1.14954e-10
SEPX1	1.61849	0.694651	1.19214e-10
TGFB2	2.73195	1.44993	1.20687e-10
C1orf198	0.711531	-0.491002	1.21531e-10
GTF2IRD1	0.66928	-0.579319	1.25638e-10
LEKR1	0.568943	-0.813643	1.26067e-10
DCBLD1	1.83596	0.876535	1.26853e-10
DPH1	0.734992	-0.444199	1.28243e-10
CFI	2.81745	1.49439	1.28243e-10
EPM2AIP1	0.605633	-0.723484	1.28243e-10
AKD1	0.553588	-0.853116	1.2918e-10
TRIM2	0.428127	-1.22389	1.3129e-10
KIAA1683	0.373686	-1.4201	1.31503e-10
AGFG1	1.51591	0.600185	1.3806e-10
OXSM	0.719035	-0.475866	1.38642e-10
LOC221442	0.361109	-1.46949	1.39095e-10
DIAPH3	1.99947	0.999614	1.39673e-10
RNF175	2.27194	1.18392	1.41046e-10
MCTP1	3.09164	1.62837	1.41046e-10
GTF2H1	1.35106	0.434087	1.41148e-10
CYB5D2	0.647619	-0.626784	1.42615e-10
PAPSS2	2.16453	1.11406	1.42974e-10
CAPN9	0.20634	-2.2769	1.44915e-10
AMOTL2	1.85353	0.890278	1.44934e-10
FARP2	0.573289	-0.802666	1.45828e-10
C5orf39	1.87212	0.904674	1.48495e-10
RGL3	0.179748	-2.47595	1.48915e-10
VPS37D	0.410012	-1.28626	1.51809e-10
MZF1	0.608547	-0.716558	1.5333e-10
PLA2G2F	0.102921	-3.2804	1.54864e-10
EFEMP1	5.06364	2.34018	1.63459e-10
ZNF506	0.568335	-0.815186	1.68297e-10
SLC6A4	0.291348	-1.77918	1.74636e-10
TMEM71	2.47115	1.30518	1.78274e-10
NEK8	0.597643	-0.742645	1.8121e-10
CCDC42	1.48525	0.570705	1.82878e-10
SYTL5	0.191119	-2.38746	1.87099e-10
ATAD3C	0.424658	-1.23563	1.87563e-10
LOC100130015	0.52757	-0.922566	1.88092e-10
MT1G	3.87574	1.95447	1.88104e-10
ZNF33B	0.664258	-0.590184	1.89318e-10
SLC41A3	0.725076	-0.463795	1.89533e-10
TUG1	0.701249	-0.512001	1.92569e-10
ZNF561	0.665683	-0.587092	1.93048e-10
TUBB6	2.32434	1.21682	1.93181e-10
GDPD3	0.26748	-1.9025	1.94269e-10
DEK	1.69146	0.758273	1.95165e-10
KIAA0020	1.51117	0.59567	1.95613e-10
GSDMD	1.6678	0.737948	1.96267e-10
PLA2G4C	2.667	1.41522	1.97377e-10
TOP3B	0.673058	-0.571198	1.98242e-10
TLR7	3.05858	1.61286	1.98424e-10
GCOM1	0.368009	-1.44219	1.98501e-10
CCDC64B	0.26255	-1.92933	2.03045e-10
IFITM2	2.12908	1.09023	2.03274e-10
KCNE2	0.537646	-0.895272	2.10191e-10
GCNT2	2.81115	1.49116	2.10332e-10
PTCD3	0.752131	-0.410945	2.10503e-10
CHD3	0.664742	-0.589133	2.11036e-10
LOC338799	0.492695	-1.02123	2.11757e-10
DPF3	2.22909	1.15645	2.12533e-10
SLC25A22	1.4754	0.561109	2.1282e-10
NFIX	2.04314	1.03079	2.13901e-10
PSMD2	1.42249	0.508415	2.1527e-10
POF1B	0.178671	-2.48462	2.16832e-10
S100A8	9.25086	3.20959	2.18556e-10
SIGLEC8	2.87078	1.52144	2.21741e-10
LOC100133669	2.24821	1.16878	2.23262e-10
ZNF141	0.608574	-0.716495	2.23389e-10
LOC729234	0.418802	-1.25566	2.24469e-10
UBAP1	1.40564	0.49123	2.24901e-10
L1CAM	6.70504	2.74525	2.26136e-10
TNFRSF12A	2.14498	1.10097	2.28123e-10
PM20D1	0.0718176	-3.79952	2.28123e-10
CXCL2	3.9976	1.99913	2.28507e-10
FBRSL1	0.649204	-0.623256	2.29931e-10
ITPR2	1.73363	0.793796	2.30556e-10
ZNF785	0.657196	-0.605604	2.31247e-10
MATK	3.04411	1.60602	2.33096e-10
NNMT	3.81016	1.92985	2.36112e-10
SYDE2	0.498168	-1.0053	2.39402e-10
ODZ2	8.11985	3.02145	2.40315e-10
EPB41L1	0.471153	-1.08573	2.41411e-10
MAPK10	0.333181	-1.58562	2.41411e-10
LOC285830	2.33688	1.22458	2.51777e-10
ZNF681	0.412598	-1.27719	2.53442e-10
FOLR2	2.98823	1.57929	2.53726e-10
LOC643008	0.265326	-1.91416	2.55263e-10
SLC25A38	0.719051	-0.475835	2.56654e-10
NUMA1	0.726606	-0.460754	2.58215e-10
PLCL2	2.38704	1.25522	2.5962e-10
RAP2C	1.35545	0.438767	2.5962e-10
DPP4	4.08676	2.03096	2.65909e-10
PELO	1.4417	0.52777	2.69998e-10
TREM1	3.72953	1.899	2.69998e-10
TBC1D3B	0.475951	-1.07111	2.71165e-10
DHRS11	0.542907	-0.881223	2.74555e-10
PCYT2	0.626532	-0.67454	2.75294e-10
WASH3P	0.634186	-0.657023	2.75872e-10
COL23A1	2.30077	1.20212	2.80492e-10
FGF5	3.3264	1.73396	2.85024e-10
CNNM2	0.713295	-0.48743	2.89424e-10
KIAA1432	1.5337	0.617016	2.89825e-10
FSD1L	2.48921	1.31569	3.00072e-10
TSGA10	0.525433	-0.928421	3.02014e-10
TRAPPC6A	0.503072	-0.991164	3.02091e-10
LOC100128288	0.487623	-1.03616	3.02736e-10
CAMK2G	0.641393	-0.640719	3.02753e-10
CYP4B1	0.104315	-3.26098	3.04981e-10
RIN2	1.69024	0.757227	3.04981e-10
GJC3	0.536174	-0.899226	3.04981e-10
FOXA1	0.182548	-2.45365	3.1155e-10
MFSD6L	0.254289	-1.97546	3.11923e-10
EMILIN2	2.12182	1.08531	3.17467e-10
DERA	1.48197	0.567519	3.18374e-10
BDH1	0.514693	-0.958216	3.19149e-10
PACRG	0.272256	-1.87696	3.19815e-10
DEPDC5	0.716827	-0.480304	3.21369e-10
MTHFD2	1.8223	0.865762	3.25993e-10
NISCH	0.675674	-0.565601	3.32333e-10
DOCK3	0.285558	-1.80814	3.34113e-10
PTPLAD2	2.34406	1.22901	3.3485e-10
KIAA1370	0.589667	-0.762028	3.35358e-10
TCF19	1.76923	0.823119	3.35453e-10
AMZ1	2.991	1.58063	3.36878e-10
ST3GAL4	0.440101	-1.18409	3.38151e-10
LOC100134713	0.637534	-0.649427	3.38151e-10
UBE2A	1.30101	0.379631	3.39629e-10
NFRKB	0.731967	-0.450149	3.4072e-10
PRRT1	0.490027	-1.02907	3.4151e-10
EIF2S1	1.37272	0.457032	3.4151e-10
C9orf69	1.46589	0.551774	3.4151e-10
SFRS11	0.716184	-0.481598	3.4151e-10
SALL2	0.383811	-1.38153	3.42239e-10
AFMID	0.710794	-0.492496	3.42239e-10
TOR1A	1.31519	0.395276	3.44395e-10
DOCK11	2.53956	1.34458	3.48208e-10
FBXO16	0.474128	-1.07665	3.53165e-10
IL8	4.10013	2.03567	3.54657e-10
MYCN	0.203974	-2.29354	3.55084e-10
FLJ42627	0.530457	-0.914693	3.56891e-10
CDC37L1	1.44402	0.530087	3.59855e-10
CRYBB1	2.09542	1.06724	3.59855e-10
RAB5B	0.733466	-0.447199	3.62491e-10
POU5F1B	0.404346	-1.30634	3.64613e-10
LOC152225	2.05181	1.0369	3.66807e-10
TMEM105	0.331763	-1.59177	3.7021e-10
RAPSN	0.356234	-1.4891	3.72806e-10
TBC1D12	0.71269	-0.488652	3.73441e-10
RAP2B	1.56154	0.642973	3.77683e-10
DNAJB7	0.606874	-0.720531	3.79821e-10
RPRM	0.287269	-1.79952	3.83018e-10
MFSD1	1.45051	0.536564	3.84223e-10
ZNF846	0.576866	-0.793691	3.85756e-10
CCDC11	0.437379	-1.19304	3.86094e-10
SFT2D3	0.735322	-0.443552	3.88053e-10
NFE2	2.94126	1.55643	3.89943e-10
CCDC88A	2.09506	1.06699	4.02592e-10
CCDC30	0.564472	-0.825026	4.15732e-10
ZNF446	0.664367	-0.589947	4.23009e-10
SLC45A3	0.480471	-1.05748	4.23302e-10
HELB	1.88314	0.913137	4.23302e-10
TMEM176A	2.79743	1.4841	4.28124e-10
ZNF91	0.484114	-1.04658	4.30762e-10
TRAF2	1.48335	0.568857	4.31178e-10
KRT86	3.44855	1.78599	4.33564e-10
NLK	0.70093	-0.512657	4.35432e-10
IPPK	1.74934	0.806815	4.37956e-10
TREML2	2.40325	1.26499	4.39091e-10
SERINC4	0.529647	-0.916896	4.50447e-10
AGPHD1	0.613619	-0.704585	4.559e-10
POLE3	1.41945	0.505331	4.58179e-10
CLCN3	0.588415	-0.765094	4.63771e-10
TST	0.52367	-0.933271	4.6435e-10
IYD	0.23906	-2.06456	4.66335e-10
HTRA3	3.7008	1.88784	4.91134e-10
C10orf105	0.351868	-1.5069	4.91134e-10
LIMCH1	0.35033	-1.51321	4.94148e-10
FLJ13197	0.468182	-1.09486	4.94297e-10
GPR160	0.357436	-1.48424	4.95346e-10
SLC22A5	0.60176	-0.73274	4.95346e-10
PHGR1	0.178626	-2.48499	4.95426e-10
CRTAC1	0.12208	-3.0341	4.98955e-10
HMHA1	1.86284	0.897503	5.00927e-10
ZNF124	0.549514	-0.863772	5.05086e-10
KRT81	5.30887	2.40841	5.17109e-10
PANK2	1.30664	0.385856	5.18305e-10
PKMYT1	1.75742	0.813456	5.21947e-10
HS3ST5	0.248445	-2.009	5.25209e-10
MTSS1L	0.587361	-0.76768	5.25209e-10
STAC	3.19075	1.67389	5.25637e-10
C1orf93	0.61211	-0.708138	5.27755e-10
SPATA6	0.434396	-1.20292	5.28325e-10
CROCCL2	0.607196	-0.719765	5.36577e-10
GPX2	0.0972692	-3.36187	5.37106e-10
FAM49B	1.40232	0.487819	5.39864e-10
DUSP7	2.119	1.08339	5.40455e-10
LOC91316	0.574096	-0.800636	5.40455e-10
PLXNC1	3.18567	1.6716	5.41942e-10
SNHG10	0.611854	-0.70874	5.59031e-10
GFPT2	4.71764	2.23807	5.62186e-10
AHSA2	0.558937	-0.839243	5.63226e-10
MSX2P1	0.48336	-1.04883	5.76055e-10
API5	1.29463	0.372536	5.78307e-10
PECI	1.72136	0.78355	5.80397e-10
ARHGAP30	1.89105	0.91919	5.80741e-10
ARID2	0.687957	-0.539609	5.81671e-10
C12orf4	1.33762	0.419667	5.82052e-10
LOC100130872	2.16403	1.11372	5.82552e-10
CLSTN3	0.637989	-0.648397	5.87055e-10
DNAJA4	0.515135	-0.956977	5.95364e-10
NFXL1	0.672358	-0.572699	5.97159e-10
RRM1	1.55464	0.636581	5.97234e-10
ZNF43	0.429256	-1.22009	5.98421e-10
CLNK	1.54128	0.624127	6.01216e-10
ANXA6	2.38176	1.25203	6.09127e-10
RAPGEFL1	0.351423	-1.50872	6.09127e-10
MGC87042	2.86444	1.51825	6.20671e-10
TMEM168	0.62123	-0.686802	6.21586e-10
HCN3	0.574148	-0.800506	6.3258e-10
C10orf54	1.81174	0.857378	6.34228e-10
PPIL6	0.514674	-0.95827	6.39355e-10
FAP	4.17108	2.06042	6.43387e-10
TMEM22	2.29563	1.19889	6.46149e-10
HEXB	1.45361	0.539644	6.48094e-10
LOC389332	0.466735	-1.09932	6.60275e-10
C14orf167	0.658168	-0.603473	6.60643e-10
C11orf61	0.627914	-0.671362	6.61246e-10
CCDC76	0.714119	-0.485763	6.63359e-10
CTXN1	0.381029	-1.39203	6.67831e-10
SCAMP5	0.469611	-1.09046	6.6928e-10
RBM7	1.45979	0.545756	6.70818e-10
IGSF5	0.381021	-1.39206	6.74756e-10
HS3ST3B1	2.45705	1.29693	6.81844e-10
TPM3	1.35148	0.434536	6.89797e-10
NAT9	0.722212	-0.469505	6.92063e-10
PALM2-AKAP2	2.14332	1.09985	6.92729e-10
CHST7	1.83001	0.871853	6.94294e-10
C22orf26	1.70462	0.769451	7.0515e-10
C3orf34	1.63561	0.709833	7.08361e-10
LAMC2	3.7558	1.90912	7.10748e-10
CASQ1	0.184273	-2.44008	7.15496e-10
PODXL2	0.321786	-1.63583	7.15496e-10
WSCD2	0.183296	-2.44775	7.17133e-10
SYT2	0.463067	-1.11071	7.21414e-10
SILV	0.509638	-0.972456	7.21414e-10
MAFB	2.35804	1.23759	7.22708e-10
APOE	3.18682	1.67212	7.33244e-10
RGS10	1.79288	0.842276	7.37166e-10
MYLIP	0.493287	-1.0195	7.39813e-10
ARHGAP32	0.565828	-0.821563	7.41748e-10
PARVB	2.38165	1.25196	7.50591e-10
C6orf153	1.41518	0.500984	7.55396e-10
PLAC8	3.69772	1.88664	7.5659e-10
LAT	1.9732	0.980539	7.58781e-10
ASTN2	0.332025	-1.59064	7.61602e-10
GGT6	0.198813	-2.33052	7.66922e-10
DACH2	0.270527	-1.88616	7.86419e-10
RRAS2	1.82808	0.87033	7.89591e-10
EVPL	0.392428	-1.3495	7.89591e-10
AP1G2	0.624911	-0.678276	7.91879e-10
USP3	0.711942	-0.490169	7.9738e-10
KIR2DL1	1.82609	0.868755	8.00793e-10
PDPN	2.95014	1.56078	8.13623e-10
DCLRE1B	1.46864	0.554477	8.17771e-10
TMEM45B	0.233627	-2.09772	8.19368e-10
SULF2	3.40844	1.76911	8.22728e-10
LLGL2	0.506169	-0.982308	8.25239e-10
PDE9A	0.273255	-1.87168	8.31534e-10
SERPINB4	10.5284	3.39621	8.32203e-10
TTYH1	0.401212	-1.31756	8.3582e-10
C19orf59	2.57163	1.36268	8.36524e-10
ZNF814	0.577313	-0.792573	8.3795e-10
RPL15	0.718719	-0.476501	8.45119e-10
PRKCDBP	2.22728	1.15528	8.45606e-10
C1orf88	0.328024	-1.60813	8.45933e-10
ZNF804A	2.28098	1.18965	8.5771e-10
HAMP	2.69267	1.42904	8.5983e-10
MYST4	0.659848	-0.599795	8.78232e-10
CSDAP1	1.64554	0.718561	8.95549e-10
C14orf93	0.756639	-0.402322	9.00524e-10
KIAA1267	0.733564	-0.447006	9.0772e-10
CLIC1	1.35704	0.440464	9.16526e-10
MYRIP	0.381965	-1.38849	9.22862e-10
KCNJ5	2.56347	1.3581	9.2535e-10
SLCO1B3	6.6255	2.72803	9.26071e-10
ZNF720	0.696182	-0.522463	9.34077e-10
ST5	1.76415	0.818977	9.4851e-10
HVCN1	1.91154	0.934734	9.5381e-10
GRIP2	2.30514	1.20486	9.56216e-10
TMC4	0.373671	-1.42016	9.63389e-10
GATA2	0.368784	-1.43915	9.78499e-10
CASP9	0.68552	-0.54473	9.80913e-10
LONRF2	0.220526	-2.18098	9.85495e-10
GRHPR	1.43498	0.521028	9.90361e-10
STX2	2.05683	1.04042	9.98789e-10
LYPD6B	0.345756	-1.53218	1.0039e-09
KRT14	11.8729	3.5696	1.00714e-09
PTPRM	0.451474	-1.14728	1.00752e-09
C16orf54	3.10009	1.63231	1.00853e-09
QARS	0.733295	-0.447534	1.03291e-09
INPP1	1.79868	0.846935	1.04817e-09
TNFAIP8L3	2.78177	1.47601	1.05066e-09
NME4	0.618331	-0.693549	1.06215e-09
IL6	4.69718	2.23179	1.06215e-09
TRIOBP	0.66946	-0.57893	1.06416e-09
BTG2	0.43872	-1.18863	1.0656e-09
PAIP2B	0.531441	-0.912018	1.09138e-09
SGPP1	2.04655	1.0332	1.09842e-09
E4F1	0.720737	-0.472456	1.10144e-09
DNAJC5B	2.72818	1.44794	1.108e-09
CCDC72	0.653303	-0.614175	1.10882e-09
FEN1	1.57781	0.657922	1.12742e-09
OXCT1	2.8347	1.5032	1.12765e-09
ZBTB48	0.692867	-0.529351	1.12862e-09
SRRM3	0.373145	-1.42219	1.16475e-09
TFR2	0.363276	-1.46086	1.17551e-09
NRXN3	0.23316	-2.10061	1.18781e-09
BCDIN3D	0.719606	-0.474721	1.19426e-09
ZNF217	0.641122	-0.641329	1.19689e-09
ZNF558	0.581414	-0.782363	1.20212e-09
KIAA1543	0.4199	-1.25188	1.21486e-09
FMNL2	2.15282	1.10623	1.22077e-09
NECAP2	1.29998	0.378486	1.22322e-09
TTC28	0.513189	-0.962438	1.22902e-09
PABPC3	0.506725	-0.980724	1.23938e-09
HNF1B	0.1283	-2.96241	1.2527e-09
MBNL1	1.34253	0.424953	1.26404e-09
PLS3	1.77571	0.8284	1.2789e-09
GORASP1	0.734888	-0.444404	1.28027e-09
ITPRIPL1	2.44922	1.29232	1.28501e-09
KIAA1984	0.29274	-1.77231	1.28766e-09
SOX4	0.542946	-0.88112	1.29178e-09
AKNA	1.66661	0.73692	1.29437e-09
SC5DL	0.536543	-0.898233	1.29636e-09
ZSCAN16	0.553297	-0.853873	1.30108e-09
ABHD14A	0.5827	-0.779175	1.30281e-09
EHD1	1.50426	0.589054	1.31338e-09
ALOX15	0.253818	-1.97813	1.31713e-09
FAM176A	3.57854	1.83937	1.32021e-09
RGS9	2.61003	1.38406	1.32125e-09
TRIM62	0.644061	-0.634732	1.34161e-09
SAFB2	0.80976	-0.304434	1.34315e-09
YARS	1.34058	0.422861	1.34326e-09
PSMC3	1.37486	0.459284	1.3438e-09
COLEC10	0.453627	-1.14042	1.34706e-09
C12orf51	0.710654	-0.49278	1.34778e-09
TMEM45A	3.84799	1.9441	1.36491e-09
GPC2	0.34518	-1.53458	1.36733e-09
RHOC	1.55497	0.636888	1.40314e-09
PPIL2	0.740132	-0.434146	1.42732e-09
ZDHHC3	0.728081	-0.457829	1.45373e-09
HS3ST3A1	3.59656	1.84662	1.45462e-09
DYRK1B	0.587977	-0.766168	1.45664e-09
EVPLL	0.249917	-2.00048	1.4596e-09
SLC2A10	0.423869	-1.23831	1.46681e-09
PTK2	0.680734	-0.554836	1.47977e-09
HPGD	0.161798	-2.62774	1.49303e-09
EMX2	0.188003	-2.41117	1.50678e-09
HCCS	1.34528	0.427905	1.54757e-09
C3orf19	0.72449	-0.464962	1.54828e-09
CD1B	2.1474	1.10259	1.56863e-09
ZNF776	0.678382	-0.55983	1.5796e-09
PHF8	0.663033	-0.592847	1.58095e-09
CREB3L4	0.594408	-0.750474	1.58095e-09
PLSCR4	2.36703	1.24308	1.58095e-09
ZNF222	0.590584	-0.759785	1.58785e-09
FAM69B	0.48081	-1.05646	1.59622e-09
TAB1	0.772201	-0.372951	1.60189e-09
LUC7L	0.617735	-0.694941	1.62332e-09
FAM167A	2.34939	1.23228	1.63751e-09
ATP1B2	0.461307	-1.1162	1.64965e-09
LOC200030	0.623837	-0.680759	1.65412e-09
ERMN	2.41426	1.27158	1.67667e-09
DGAT2	0.405277	-1.30302	1.68342e-09
GRM3	0.368875	-1.4388	1.6865e-09
WASH7P	0.647833	-0.626307	1.69327e-09
COMT	0.584266	-0.775302	1.70274e-09
EFCAB4A	0.332733	-1.58756	1.70346e-09
CHAD	0.433764	-1.20502	1.71456e-09
HIF1A	1.67577	0.744824	1.71875e-09
TNFSF4	2.54158	1.34572	1.74609e-09
KIAA0125	3.32817	1.73473	1.75846e-09
RGS6	0.282308	-1.82466	1.76599e-09
C19orf73	0.598503	-0.74057	1.77107e-09
P4HA2	1.68795	0.755272	1.77195e-09
TBC1D8	0.538108	-0.894032	1.78861e-09
ZNF708	0.553322	-0.85381	1.80023e-09
[truncated: 8,801 more rows]

## Sheet: BRCA
id	fc	log2fc	padj
TAP1	6.78623	2.76261	2.68421e-245
TAP2	4.89168	2.29033	9.22711e-190
PSMB9	6.37395	2.67219	3.73212e-184
HLA-B	4.68773	2.22889	4.04416e-166
CXCR2P1	21.224	4.40763	6.01879e-161
STAT1	4.13356	2.04739	5.61682e-160
ETV7	8.07149	3.01283	5.02357e-158
HCP5	5.33786	2.41626	1.54067e-156
HLA-F	5.75027	2.52363	4.14411e-152
NLRC5	4.61685	2.20691	5.56209e-152
HLA-A	4.44728	2.15292	1.64009e-150
CXCL11	14.887	3.89598	2.48301e-148
CXCL10	12.9155	3.69103	9.01921e-147
PSMB8	3.90401	1.96496	3.75293e-146
B2M	3.26591	1.70748	6.85559e-144
BATF2	8.09532	3.01709	2.06548e-134
LAG3	9.0185	3.17289	1.04792e-131
GBP1	6.16906	2.62505	5.0712e-131
LOC400759	9.18515	3.1993	7.44973e-131
IDO1	19.0252	4.24984	1.1275e-130
HLA-H	4.47638	2.16233	5.12465e-130
ZBP1	10.2047	3.35117	9.45494e-130
EPSTI1	4.89575	2.29153	1.01391e-129
IFI44	5.48782	2.45623	1.86959e-127
GBP5	11.3628	3.50625	3.73016e-127
ICOS	9.62308	3.2665	1.48235e-124
GZMB	13.7285	3.77911	1.53603e-124
AIM2	9.62102	3.26619	9.69781e-124
HLA-E	2.97456	1.57268	4.60547e-122
XAF1	4.46882	2.15989	3.14381e-120
OASL	7.02929	2.81338	3.80502e-120
IFIH1	3.77918	1.91807	1.02339e-118
CMPK2	5.03714	2.33261	1.04842e-118
IFIT3	5.24242	2.39023	5.58893e-117
CTLA4	7.87506	2.97729	2.28187e-112
LAMP3	9.35093	3.22511	1.73535e-111
RTP4	5.65672	2.49997	2.1934e-111
CCL5	6.92636	2.7921	2.83151e-111
IRF1	3.09362	1.6293	3.92589e-111
IFI44L	6.91045	2.78878	1.40299e-110
ZBED2	9.02363	3.17371	1.4119e-110
MX1	6.61835	2.72647	3.3948e-109
ADAMDEC1	13.2476	3.72766	4.09585e-109
CCL8	7.93794	2.98876	5.13656e-109
PATL2	5.56655	2.47678	2.19018e-107
SP140	5.33761	2.41619	2.29853e-107
IL2RA	7.40552	2.8886	3.32574e-107
CD38	11.3657	3.50662	3.32574e-107
IL4I1	5.3162	2.4104	6.80984e-107
HLA-C	3.13556	1.64872	7.16909e-106
OAS2	4.92458	2.3	3.38987e-104
SLAMF8	4.4146	2.14228	6.98113e-104
GBP4	5.1524	2.36524	1.59202e-101
PARP12	2.36309	1.24067	1.9823e-100
LTA	6.02663	2.59135	5.73299e-100
TIGIT	8.55477	3.09673	9.60615e-100
CD80	4.38437	2.13237	1.01853e-99
IFNG	6.99161	2.80562	1.03755e-99
GNLY	7.97098	2.99476	1.39775e-98
UBE2L6	2.88675	1.52945	1.4376e-98
BTN3A2	2.90825	1.54015	1.09554e-97
NKG7	7.05465	2.81857	1.19142e-97
IFI27	7.00451	2.80828	1.45426e-97
APOBEC3A	6.54499	2.71039	2.13831e-97
APOL1	3.42062	1.77426	2.96425e-97
KIR2DL4	4.77489	2.25547	3.21445e-97
TIFAB	6.25098	2.64408	6.02903e-97
IFI30	2.90867	1.54036	1.03732e-96
PLSCR1	2.72595	1.44676	1.22843e-96
RSAD2	5.44674	2.44539	1.32644e-96
BTN3A3	2.85138	1.51166	2.31591e-95
PRF1	5.95879	2.57502	9.23304e-95
FAM26F	4.86222	2.28162	9.27923e-95
LGALS9	3.18357	1.67065	1.9388e-94
APOL6	3.24063	1.69627	1.9388e-94
PARP14	2.72955	1.44867	2.47098e-94
SIRPG	7.69356	2.94365	3.35828e-94
IL12RB1	4.88237	2.28758	5.47361e-94
CD7	6.52858	2.70677	6.11232e-94
HCG26	4.18759	2.06612	3.09645e-93
FOXP3	4.53196	2.18014	3.92933e-93
SLA2	5.82693	2.54274	5.28211e-93
BTN3A1	2.53964	1.34463	9.62562e-93
TMEM150B	4.61922	2.20765	2.66833e-92
LOC400696	8.32649	3.05771	1.0895e-91
CXCL9	12.711	3.66801	1.45149e-91
IL2RG	5.74404	2.52207	6.20449e-91
USP18	2.9462	1.55886	2.38535e-90
NMI	2.52834	1.33819	4.65689e-90
IL18BP	2.6633	1.41322	5.44431e-90
TBX21	5.84076	2.54616	6.60331e-90
PDCD1	6.80903	2.76745	7.36688e-90
HERC6	5.01377	2.32589	7.40477e-90
TNFSF13B	3.59765	1.84706	1.22254e-89
TRIM21	2.15245	1.10598	1.39776e-89
ISG15	6.72799	2.75018	2.42435e-89
CCR5	4.46447	2.15849	4.42521e-88
HERC5	4.33089	2.11466	9.04265e-88
IFI6	6.35519	2.66794	1.05245e-87
PDCD1LG2	3.81016	1.92985	2.29827e-87
WARS	2.5849	1.37011	2.80169e-87
SNX20	4.28683	2.09991	8.87463e-87
UBD	12.4449	3.63749	1.44332e-86
LILRB2	3.54912	1.82746	2.65205e-86
BCL2A1	5.34823	2.41906	4.9132e-86
MLKL	2.50792	1.32649	5.69182e-86
TNFRSF9	5.84595	2.54744	5.99549e-86
CD2	6.3228	2.66056	1.07981e-85
CXCR6	5.40292	2.43374	2.68797e-85
MX2	3.39381	1.7629	2.72092e-85
LAP3	1.98547	0.98948	3.77045e-85
APOBEC3H	3.89705	1.96238	5.27016e-85
SIGLEC1	3.82857	1.93681	1.97889e-84
PTPN7	4.36053	2.1245	3.34537e-84
XCL2	5.26295	2.39587	4.34004e-84
FASLG	5.51282	2.46279	1.48548e-83
ZNF683	6.22874	2.63894	1.85919e-83
OAS3	3.43694	1.78112	2.36219e-83
SLC15A3	2.68973	1.42746	3.93074e-83
RUFY4	5.76414	2.52711	4.16777e-83
OAS1	3.88634	1.95841	1.18167e-82
SH2D2A	5.12784	2.35835	1.77108e-82
PSME2	2.24733	1.16821	2.63023e-82
FPR2	4.37888	2.13056	3.82136e-82
CCR1	3.1905	1.67378	4.54769e-82
ITGB7	4.11843	2.04209	6.00064e-82
CXCR3	6.0957	2.60779	6.937e-81
CARD16	3.54597	1.82618	1.72115e-80
IFIT2	3.78099	1.91876	1.88859e-80
RASSF4	3.10331	1.63381	6.62017e-80
NCF1	4.04349	2.0156	8.51066e-80
CD247	5.49662	2.45854	1.2899e-79
IL15RA	2.98232	1.57644	1.2899e-79
LCP2	2.79715	1.48396	3.46031e-79
C1orf38	2.92399	1.54794	3.84653e-79
KLHDC7B	9.18473	3.19924	4.31439e-79
APOL3	3.05176	1.60964	5.28163e-79
PLEK	3.41461	1.77172	5.28163e-79
SOCS1	4.00214	2.00077	6.7057e-79
LCK	5.86863	2.55302	1.41157e-78
IL15	3.2009	1.67848	3.93498e-78
XCL1	4.53618	2.18148	5.43101e-78
HK3	4.98447	2.31744	1.51844e-77
SLAMF7	5.64021	2.49575	1.53136e-77
CTSS	3.01995	1.59452	1.62135e-77
CLEC4E	6.13483	2.61702	2.41601e-77
LILRA5	3.68372	1.88116	3.30743e-77
TRIM22	2.93836	1.55501	5.47718e-77
IL18RAP	4.36533	2.12609	6.04251e-77
CD86	2.83531	1.5035	8.96953e-77
SPOCK2	4.54987	2.18583	1.93328e-76
GZMA	5.69447	2.50956	9.77334e-76
CD3D	6.45494	2.6904	1.0765e-75
PYHIN1	5.90641	2.56228	1.21873e-75
PML	1.88809	0.916928	3.57638e-75
MIR155HG	3.66032	1.87197	1.20645e-74
APOBEC3G	3.38051	1.75724	1.23086e-74
APOL2	2.18614	1.12838	1.42727e-74
PARP9	2.23261	1.15873	2.32405e-74
IRF9	2.40887	1.26835	7.59192e-74
TAPBP	1.89742	0.924042	1.10305e-73
IL21R	4.78815	2.25947	2.1266e-73
FPR3	3.47948	1.79887	2.74853e-73
CD48	3.93456	1.9762	3.21123e-73
GPR171	5.24771	2.39169	3.33512e-73
FERMT3	2.91962	1.54578	3.505e-73
CCL4	3.64302	1.86514	3.97256e-73
IL32	3.95979	1.98542	4.20254e-73
CASP1	2.95346	1.56241	4.60668e-73
KCNJ10	4.62149	2.20836	4.93202e-73
CCL13	6.88511	2.78348	7.24771e-73
SH2D1A	6.27035	2.64854	8.14021e-73
CCR8	4.82662	2.27101	1.02062e-72
TNIP3	5.01604	2.32655	1.11957e-72
CD3E	6.06689	2.60096	1.67965e-72
C1QC	2.89012	1.53113	1.67965e-72
BIN2	3.13675	1.64927	3.03771e-72
CD72	3.09451	1.62971	3.12923e-72
C1QA	3.15697	1.65854	3.25646e-72
SIT1	5.59986	2.48539	3.34942e-72
UBASH3A	5.75007	2.52358	4.03026e-72
CD53	2.9806	1.5756	5.98279e-72
SLAMF6	5.76797	2.52806	7.89173e-72
NCF1C	4.65175	2.21777	8.84611e-72
SAMD9L	3.28744	1.71697	1.01225e-71
CD5	5.58205	2.48079	1.33239e-71
PLA2G2D	10.7762	3.42978	1.78135e-71
SLFN12L	3.96549	1.9875	1.88958e-71
IL10	2.86284	1.51745	3.29687e-71
IL12B	3.94459	1.97988	3.43045e-71
CD96	5.72216	2.51656	5.68849e-71
SLAMF1	5.54754	2.47185	5.72371e-71
CTSW	5.51973	2.4646	1.07742e-70
SAMD3	4.61084	2.20503	1.08282e-70
FUT7	4.27554	2.09611	1.38065e-70
ACAP1	5.55011	2.47252	1.71989e-70
BTN2A2	1.99342	0.995245	3.76138e-70
LILRB4	3.12719	1.64487	5.07032e-70
HCST	3.39127	1.76183	1.3751e-69
C1QB	3.11378	1.63867	1.53334e-69
CD97	2.63871	1.39983	2.76453e-69
PSMB10	2.45417	1.29523	6.07526e-69
DOK2	3.5677	1.83499	6.08745e-69
LILRB1	2.95372	1.56253	8.03138e-69
ISG20	2.98102	1.5758	1.23447e-68
ITK	5.7376	2.52045	1.2378e-68
CD3G	5.8318	2.54394	1.65216e-68
C2	3.0816	1.62368	2.22095e-68
HLA-DOB	5.4958	2.45833	2.78634e-68
BIRC3	3.9933	1.99758	3.52813e-68
IL2RB	4.44442	2.152	3.74269e-68
STAT2	1.65101	0.723353	4.20285e-68
TRAF3IP3	3.49928	1.80706	4.79821e-68
IFIT1	4.97265	2.31402	5.74883e-68
PSTPIP1	4.33264	2.11525	7.5528e-68
SASH3	3.10491	1.63455	8.90732e-68
PIK3AP1	2.76089	1.46513	2.02167e-67
OPTN	2.13778	1.09611	3.02587e-67
CIITA	3.64904	1.86752	4.6576e-67
PRKCQ	5.19511	2.37715	8.14068e-67
CD6	4.41729	2.14316	2.26312e-66
CD74	2.84687	1.50938	2.91432e-66
TFEC	3.10763	1.63581	3.01206e-66
KLRC1	4.21367	2.07508	3.38914e-66
LYZ	4.83491	2.27349	3.91686e-66
BTLA	5.25931	2.39487	4.34867e-66
MYO1G	3.43214	1.77911	4.44352e-66
IL10RA	3.0228	1.59589	4.44352e-66
GZMH	4.85139	2.2784	5.00333e-66
TRIM69	2.57923	1.36694	5.44434e-66
GFI1	3.71678	1.89405	5.72275e-66
CTSC	2.78747	1.47896	7.31551e-66
TYMP	3.10007	1.6323	8.49228e-66
CD274	3.42258	1.77508	1.30737e-65
CD4	2.60559	1.38161	2.27955e-65
NCR3	4.37994	2.13091	2.57211e-65
KLRK1	4.86499	2.28244	2.61132e-65
TRAT1	5.78404	2.53208	2.90398e-65
CRTAM	4.03009	2.01081	3.53099e-65
JAK3	3.46178	1.79151	3.78253e-65
GPR18	3.90002	1.96348	3.95832e-65
GPR84	3.26243	1.70595	4.23849e-65
ZAP70	5.72336	2.51686	5.07082e-65
SAMD9	3.04318	1.60558	5.30034e-65
XIRP1	6.01666	2.58896	5.70207e-65
CD8A	4.60369	2.20279	5.76125e-65
CORO1A	3.20956	1.68238	6.19015e-65
WAS	2.79729	1.48403	6.30827e-65
HLA-DMA	2.60573	1.38169	9.02848e-65
CST7	4.18578	2.0655	1.10452e-64
LILRB3	2.96698	1.569	1.57064e-64
RUNX3	3.62552	1.85819	1.87963e-64
FGD2	2.97569	1.57322	4.46963e-64
GNGT2	2.24369	1.16587	5.90016e-64
DDX58	2.49844	1.32103	8.524e-64
MCOLN2	3.36753	1.75169	1.09471e-63
SLC7A7	2.4288	1.28025	1.89814e-63
SRGN	2.61133	1.38479	5.7039e-63
IL29	3.07244	1.61939	6.48305e-63
FCN1	5.5136	2.46299	6.79889e-63
NFKBIE	2.0319	1.02283	1.31495e-62
C5orf20	5.09504	2.34909	1.48811e-62
PDE6G	2.84807	1.50998	1.56556e-62
LILRA3	3.52663	1.81829	1.84038e-62
HLA-G	4.45847	2.15655	2.49533e-62
TRPV2	2.36708	1.24311	2.82235e-62
CD8B	5.13568	2.36056	3.34296e-62
PILRA	2.25378	1.17235	4.00189e-62
PTPN22	3.34277	1.74104	4.26927e-62
S1PR4	4.33067	2.11459	5.08202e-62
STAT4	4.00189	2.00068	6.87582e-62
HLA-DMB	2.71314	1.43997	9.64852e-62
STAP1	4.46907	2.15997	2.00728e-61
P2RY6	3.0615	1.61424	2.40987e-61
CLEC7A	3.18227	1.67005	2.60756e-61
LGMN	1.87481	0.906747	2.65966e-61
ARHGAP30	2.5128	1.3293	3.12272e-61
PTPRCAP	4.91423	2.29697	3.20889e-61
MAP4K1	3.75689	1.90954	3.69743e-61
CASP5	2.75813	1.46369	4.15806e-61
FCRL3	6.34699	2.66607	5.70842e-61
TMEM149	2.33975	1.22636	7.19266e-61
FMNL1	2.42328	1.27696	9.27443e-61
TNFRSF1B	2.53711	1.34319	1.07973e-60
CD244	3.28619	1.71642	1.32936e-60
LAPTM5	2.2886	1.19446	1.33968e-60
LAIR1	2.36098	1.23938	1.63312e-60
FCER1G	2.27704	1.18716	2.75046e-60
LY9	5.05487	2.33767	4.75389e-60
DDX60	2.90498	1.53853	5.5713e-60
PIM2	2.50749	1.32624	5.5762e-60
CD27	5.06512	2.3406	8.78099e-60
PLA2G7	4.07296	2.02608	9.85697e-60
TBC1D10C	4.27018	2.0943	1.07612e-59
CLEC6A	2.86067	1.51635	1.14341e-59
SPI1	2.43901	1.2863	1.22994e-59
CCL2	3.15343	1.65692	1.33573e-59
KLRD1	3.99966	1.99988	2.65267e-59
IKZF1	3.12001	1.64155	2.65267e-59
SCML4	4.64875	2.21684	4.61627e-59
CR1L	2.75791	1.46358	4.61627e-59
ARHGAP9	3.2098	1.68248	4.67598e-59
RHOF	4.00452	2.00163	4.95017e-59
CD300LF	2.59066	1.37332	5.4452e-59
HPSE	3.07962	1.62275	6.14421e-59
TAGAP	3.12002	1.64156	7.01025e-59
NCF4	2.50382	1.32413	1.07818e-58
FYB	3.07806	1.62202	1.25317e-58
HLA-L	2.66565	1.41449	3.0384e-58
SAMHD1	2.46948	1.30421	3.23102e-58
LOC100188949	3.32671	1.7341	3.6884e-58
ITGB2	2.75579	1.46247	5.1689e-58
IRF4	5.62192	2.49106	5.6598e-58
TMEM140	1.65667	0.728284	5.88685e-58
LTB	6.65441	2.73431	7.78064e-58
FLVCR2	2.23524	1.16043	1.32092e-57
SEMA4D	1.7545	0.811063	1.50148e-57
SPIB	7.87278	2.97687	2.03494e-57
EOMES	5.11666	2.3552	2.7229e-57
TTC24	2.88142	1.52678	2.89651e-57
NCF1B	3.28441	1.71564	3.05849e-57
LYN	2.4254	1.27822	3.15777e-57
PTPRC	3.64427	1.86563	3.94805e-57
CD226	3.17356	1.6661	4.75525e-57
IL12RB2	7.96223	2.99317	4.77933e-57
PLAC8	4.90805	2.29515	5.78722e-57
DOK3	2.10868	1.07634	6.98927e-57
CD40	2.45202	1.29397	7.09055e-57
ARHGAP25	2.44251	1.28836	8.61513e-57
HLA-DRA	2.72326	1.44533	1.02488e-56
NCF2	2.45072	1.29321	1.03411e-56
SAMSN1	2.59686	1.37677	1.17945e-56
ZBTB32	2.81669	1.494	1.50113e-56
RNF19B	1.6897	0.756768	1.65482e-56
NCKAP1L	2.78539	1.47788	2.14429e-56
ICAM1	2.78987	1.4802	3.35623e-56
PRIC285	2.27268	1.18439	3.74388e-56
ZNF831	4.89674	2.29182	4.2546e-56
CCL18	7.93545	2.98831	4.40791e-56
TNFRSF8	3.06751	1.61707	7.594e-56
IFIT5	1.98513	0.989237	9.11062e-56
EIF2AK2	2.05734	1.04078	9.68285e-56
CYTIP	3.41393	1.77144	1.38046e-55
PRKCB	4.17006	2.06007	1.59523e-55
CD52	3.73831	1.90239	1.65778e-55
CCR7	4.59867	2.20122	2.49733e-55
ZC3H12D	3.03874	1.60347	2.81034e-55
TNFAIP3	2.41273	1.27066	2.81663e-55
KLHL6	2.82277	1.49711	4.3316e-55
SLC2A6	3.05126	1.6094	6.63685e-55
LPXN	2.14382	1.10018	7.33747e-55
HAVCR2	2.14095	1.09825	8.60698e-55
SECTM1	3.27513	1.71155	9.49482e-55
LIMD2	2.9491	1.56028	1.47961e-54
TCL1A	7.04226	2.81604	3.48233e-54
CLEC4D	2.79487	1.48278	3.63199e-54
SELL	3.96221	1.98631	3.65731e-54
CD68	2.17007	1.11774	4.14385e-54
TNFAIP8L2	2.3577	1.23738	7.81561e-54
HCK	2.45661	1.29667	9.22055e-54
FAM78A	2.30104	1.20229	9.96167e-54
C1orf200	2.06354	1.04512	1.20584e-53
SH3BP1	2.0623	1.04425	1.20584e-53
C5orf56	2.09157	1.06458	1.4704e-53
SERPINB9	2.28293	1.19089	1.74983e-53
TLR8	3.44491	1.78447	2.54527e-53
TMIGD2	3.13693	1.64936	3.51003e-53
GPR174	4.08214	2.02932	3.62478e-53
CTSL1	1.88395	0.913758	3.85329e-53
CCL7	5.19025	2.3758	4.15159e-53
WNT10A	4.29115	2.10136	4.78894e-53
TMC8	2.95561	1.56345	5.62806e-53
LAIR2	2.84253	1.50718	7.76959e-53
HCLS1	2.46823	1.30348	7.88441e-53
SP100	1.74669	0.804627	9.96591e-53
GZMM	4.58488	2.19689	1.13162e-52
PARP15	3.55982	1.8318	2.59331e-52
NPL	2.10478	1.07367	2.6721e-52
GRAMD1B	3.0979	1.63129	3.53032e-52
TRAF1	2.46154	1.29956	3.92545e-52
CXCL13	11.2231	3.4884	4.09949e-52
CD163	3.02229	1.59564	4.46412e-52
CD70	3.36442	1.75036	4.51081e-52
DTX3L	1.75056	0.807817	4.53152e-52
IRF8	2.88729	1.52972	4.92587e-52
CD83	2.20959	1.14378	6.82792e-52
STX11	2.35023	1.2328	7.55015e-52
SIGLEC7	2.4028	1.26472	7.86037e-52
MNDA	2.47057	1.30484	8.17981e-52
HLA-DRB1	2.85484	1.51341	1.51595e-51
KIR3DL2	3.0086	1.58909	1.91232e-51
IDO2	2.74531	1.45697	2.23931e-51
FCGR1A	2.50296	1.32363	2.49749e-51
TNFSF14	3.00531	1.58751	2.75587e-51
SLA	2.53772	1.34353	3.42077e-51
IFITM1	3.09343	1.62921	3.7132e-51
SP110	2.00743	1.00535	3.83387e-51
LAT	2.98591	1.57817	4.10038e-51
GTSF1L	1.89584	0.922836	4.52355e-51
HAPLN3	3.8245	1.93527	6.00212e-51
ADA	2.15765	1.10946	6.95021e-51
AOAH	3.32316	1.73255	2.05336e-50
CD37	2.67908	1.42174	2.52867e-50
CYBB	2.8242	1.49784	3.17979e-50
C1orf162	2.16803	1.11638	4.15263e-50
SPN	2.94588	1.5587	4.20834e-50
OSCAR	2.24288	1.16535	5.00811e-50
C19orf66	1.95783	0.969257	6.93158e-50
TSPAN33	2.34639	1.23044	9.45672e-50
ZNF80	3.04798	1.60785	1.01112e-49
MEFV	2.23943	1.16313	1.01647e-49
LILRA6	2.93211	1.55194	1.06058e-49
C16orf54	3.47513	1.79707	1.12415e-49
DOCK2	2.73871	1.4535	1.66683e-49
LAX1	4.44632	2.15261	2.64396e-49
SIGLEC10	2.53159	1.34004	2.9715e-49
TREML2	3.27971	1.71357	3.81372e-49
SLC2A5	3.24088	1.69638	4.69118e-49
CYTH4	2.32271	1.21581	5.0815e-49
MYD88	1.48323	0.568739	6.69633e-49
GZMK	5.41712	2.43753	7.59645e-49
HTRA4	2.95761	1.56443	7.88745e-49
RASAL3	2.6916	1.42846	8.62636e-49
KIAA1949	1.80754	0.854027	8.74298e-49
RELB	2.11233	1.07884	8.97039e-49
NCR1	2.07081	1.0502	9.65556e-49
COTL1	2.29427	1.19803	1.10855e-48
FCGR1B	2.27693	1.18709	1.84358e-48
TIMD4	3.45614	1.78916	2.17454e-48
CCR2	3.8126	1.93077	2.48484e-48
MEI1	3.23373	1.6932	3.45021e-48
ADAM8	2.76523	1.4674	5.7663e-48
P2RY10	4.02447	2.0088	5.93419e-48
LST1	2.35484	1.23563	6.57005e-48
CXCR5	4.42911	2.14702	6.78226e-48
IL1R2	4.32496	2.11269	8.00215e-48
BATF3	2.37941	1.25061	9.76581e-48
MAL	4.30502	2.10602	9.81889e-48
OTOF	3.38044	1.75721	1.15411e-47
KIR2DL3	2.27871	1.18822	1.1657e-47
PIK3CD	2.43123	1.28169	1.1866e-47
RAC2	2.5245	1.336	1.21374e-47
PARVG	2.36272	1.24045	1.28966e-47
LGALS2	4.75236	2.24864	1.29006e-47
IFI16	2.23412	1.15971	1.41875e-47
MARCO	8.16655	3.02973	1.45458e-47
C15orf53	1.58564	0.665068	1.56006e-47
CD40LG	4.04312	2.01547	2.45743e-47
TYROBP	2.12698	1.0888	2.65487e-47
C17orf87	2.57922	1.36694	3.12639e-47
SOD2	2.18765	1.12938	3.25565e-47
NFAM1	2.30483	1.20466	4.84306e-47
SLCO5A1	3.69985	1.88747	6.04136e-47
LY6E	2.82539	1.49845	6.13211e-47
CARD11	3.02072	1.59489	7.15048e-47
REC8	3.50991	1.81143	7.36927e-47
THEMIS	4.01553	2.00559	9.07143e-47
EVI2B	2.58813	1.37191	1.48482e-46
BCL2L14	4.39903	2.13719	2.16391e-46
IFI35	2.27889	1.18833	2.24099e-46
LGALS3BP	2.26307	1.17828	2.4918e-46
MYO1F	2.2897	1.19516	2.79693e-46
LOC96610	6.04739	2.59631	3.69464e-46
SEL1L3	2.98077	1.57569	4.86576e-46
HLA-DPA1	2.48514	1.31333	5.57528e-46
RAP2B	1.64688	0.719732	7.8749e-46
GMFG	2.18359	1.1267	7.8749e-46
BTK	2.29709	1.1998	8.21615e-46
AIF1	2.09565	1.0674	1.10891e-45
CD28	2.93619	1.55395	1.17228e-45
CHST11	2.22449	1.15347	1.71244e-45
RASGEF1B	2.36417	1.24133	2.07749e-45
LOC606724	2.80416	1.48757	2.97492e-45
KCNAB2	2.22865	1.15617	3.26423e-45
SSTR3	2.18335	1.12655	3.34122e-45
GPR65	2.22426	1.15333	3.51406e-45
JAKMIP1	4.35854	2.12384	3.71221e-45
SH2D1B	2.51087	1.32819	3.9075e-45
LYSMD2	2.00873	1.00628	4.56361e-45
CXorf21	2.37978	1.25083	4.56543e-45
RLTPR	4.58806	2.19788	6.82175e-45
GIMAP5	2.50552	1.32511	7.19319e-45
GVIN1	3.32321	1.73258	1.09212e-44
NFKB2	1.74974	0.807138	1.41099e-44
STAC3	2.05185	1.03693	1.4951e-44
MS4A4A	2.37099	1.24549	2.03476e-44
VNN2	3.0752	1.62068	2.10483e-44
KIAA0748	3.42855	1.7776	2.47074e-44
BAK1	1.60868	0.685874	2.5383e-44
EGFL6	3.80759	1.92888	3.29308e-44
CSF2RB	2.71768	1.44238	3.3064e-44
DAPP1	2.73918	1.45375	3.57361e-44
APOBEC3D	2.63579	1.39823	3.76724e-44
CTRL	2.34675	1.23066	4.0149e-44
HLA-DQA1	3.19759	1.67698	4.11937e-44
CLEC4A	2.16682	1.11558	5.33166e-44
CD180	2.38019	1.25107	5.42153e-44
GIMAP4	2.1158	1.08121	6.36529e-44
GPR55	3.57955	1.83978	8.8222e-44
GBP6	3.47394	1.79657	1.06306e-43
FCRL6	3.1126	1.63812	1.07843e-43
CD79A	6.45805	2.6911	1.43758e-43
PIK3R5	2.14315	1.09973	1.72043e-43
GRAP2	2.9759	1.57333	1.89165e-43
EMILIN2	2.15966	1.11081	2.69459e-43
ANKRD58	2.16395	1.11367	3.50251e-43
UBASH3B	2.58599	1.37072	4.34147e-43
CSK	1.54827	0.63066	4.36559e-43
RELT	1.91666	0.938591	5.94192e-43
HLA-DQB1	3.0034	1.5866	6.0707e-43
TDO2	3.8524	1.94576	1.11179e-42
TOX	3.57387	1.83749	1.16326e-42
CD19	6.16852	2.62492	1.25913e-42
CLEC12A	3.19132	1.67416	1.84112e-42
RNF213	1.86058	0.89575	1.98413e-42
FGR	2.17426	1.12052	3.30545e-42
MPP1	1.76178	0.81703	3.93101e-42
NLRC3	2.13794	1.09622	4.01537e-42
ITGAX	2.15375	1.10685	4.08761e-42
FXYD2	2.49291	1.31783	4.25955e-42
GLT1D1	2.5791	1.36687	6.09653e-42
PSMB2	1.48942	0.574746	7.9851e-42
CFLAR	1.7294	0.790271	8.97451e-42
LCP1	2.29793	1.20033	9.38237e-42
LRRC25	1.98558	0.989558	9.92293e-42
FCRL5	6.06057	2.59945	1.03729e-41
FCGR3A	2.31368	1.21019	1.26628e-41
EBI3	2.83175	1.50169	1.50518e-41
PLEKHO1	1.94058	0.956488	1.51848e-41
AKNA	2.0053	1.00382	2.43025e-41
CASP4	1.82027	0.864151	2.47774e-41
C11orf21	2.96859	1.56978	2.86097e-41
C8orf80	3.57137	1.83648	2.89001e-41
FCGR1C	2.18322	1.12646	2.9051e-41
CD300A	1.94801	0.961999	2.96345e-41
DUSP2	2.33601	1.22405	3.46882e-41
GPR183	2.72737	1.44751	3.59478e-41
TNFAIP8	1.93921	0.95547	3.62742e-41
MS4A6A	2.12211	1.0855	4.58719e-41
P2RY8	2.49227	1.31746	4.69003e-41
IL7	2.68394	1.42435	5.82033e-41
GPR114	3.53516	1.82178	6.44147e-41
C20orf118	1.94928	0.96294	7.92574e-41
SIGLEC5	2.36446	1.24151	8.0499e-41
C19orf38	2.18575	1.12813	9.38305e-41
CECR1	2.41056	1.26937	1.04735e-40
2022-09-01	2.7985	1.48465	1.14736e-40
IFNB1	1.96629	0.975477	1.272e-40
MPEG1	2.41317	1.27093	1.38603e-40
NLRC4	1.90293	0.928221	1.47462e-40
ITGAL	2.68831	1.4267	1.5125e-40
DDX60L	2.08725	1.0616	1.61042e-40
RHBDF2	1.78284	0.834174	1.84999e-40
RAB33A	2.1945	1.13389	1.87439e-40
VAV1	2.45514	1.29581	1.94599e-40
CCL3	2.52546	1.33654	2.16789e-40
POU2AF1	5.33395	2.4152	2.24765e-40
ARHGAP15	2.47664	1.30838	2.75426e-40
ASB2	2.87471	1.52342	2.79198e-40
FANCA	2.37455	1.24766	2.99897e-40
RHOG	1.48507	0.570532	3.28085e-40
IL27	2.1193	1.08359	3.37357e-40
CD200R1	2.63023	1.39519	3.71828e-40
AMICA1	3.08211	1.62392	6.30688e-40
HLA-DPB1	2.3502	1.23278	7.94543e-40
BST2	2.99422	1.58218	9.71243e-40
WDFY4	2.85629	1.51414	1.13432e-39
PTCRA	2.29287	1.19715	1.50152e-39
CSAG3	5.33402	2.41522	3.38888e-39
ABI3	1.88469	0.914324	4.04464e-39
FBXO6	1.71903	0.781598	4.25654e-39
GPSM3	2.0556	1.03956	5.4981e-39
IGF2BP3	3.36098	1.74888	6.02868e-39
IGSF6	2.24896	1.16926	8.07885e-39
CD14	2.06094	1.0433	9.3485e-39
SMTNL1	2.27033	1.1829	1.00794e-38
INSL3	2.22723	1.15525	1.18578e-38
ECEL1	4.42925	2.14706	1.5226e-38
SP140L	2.11149	1.07826	1.66765e-38
TNF	3.09819	1.63143	2.17661e-38
IL18	2.37964	1.25074	2.17984e-38
GBP2	2.20672	1.1419	2.64751e-38
EMR2	2.08558	1.06045	2.83426e-38
CXorf65	2.03778	1.027	2.84509e-38
COL29A1	2.8293	1.50044	2.88563e-38
LOC100233209	2.81822	1.49478	4.04657e-38
KIR3DL1	2.12378	1.08664	4.28727e-38
TRIM38	1.65326	0.725317	4.42534e-38
CD101	1.96892	0.977407	4.46586e-38
VCAM1	2.70092	1.43345	5.26271e-38
HLA-DQA2	3.26526	1.7072	5.42966e-38
BCL11B	3.63111	1.86041	6.11088e-38
GMIP	1.60516	0.682714	6.16339e-38
PLCB2	2.08233	1.0582	6.87424e-38
CD69	3.05665	1.61195	7.81649e-38
CD79B	3.56993	1.8359	9.55941e-38
CLEC4C	2.52193	1.33453	9.81396e-38
FAM20A	2.51872	1.33269	1.22052e-37
CHST2	2.38685	1.25511	1.55474e-37
LZTFL1	0.607775	-0.718392	1.56882e-37
SIRPB1	2.28029	1.18922	1.71467e-37
IL23A	2.20077	1.13801	2.17154e-37
CCL22	2.88614	1.52914	2.48407e-37
CDC25B	2.03698	1.02643	2.61943e-37
MCART6	2.32941	1.21997	3.404e-37
MAML3	0.526457	-0.925612	3.93025e-37
SH3KBP1	1.80671	0.853365	3.95285e-37
APOBEC3F	2.0006	1.00043	4.04599e-37
CACNA1D	0.262795	-1.92799	4.18839e-37
SELPLG	2.1314	1.0918	5.15255e-37
KCNA3	3.15473	1.65752	5.21232e-37
IFITM3	2.09589	1.06756	5.21641e-37
UNC13D	2.66639	1.41489	5.68446e-37
LY96	1.91088	0.934236	6.46919e-37
POLI	0.593689	-0.752222	6.66227e-37
IL9R	2.33078	1.22081	6.83212e-37
IFNAR2	1.66694	0.737201	7.91385e-37
PLA2G12A	0.622396	-0.684095	8.98631e-37
TXK	2.49483	1.31894	9.02235e-37
CARD17	1.81568	0.860508	9.64869e-37
AQP9	4.42377	2.14528	9.95536e-37
GIMAP2	2.09663	1.06807	1.04941e-36
C16orf57	1.60633	0.683767	1.19397e-36
TLR1	2.06131	1.04356	1.22298e-36
TTC7A	1.70979	0.773815	1.42351e-36
RNASE6	1.94756	0.961665	1.45168e-36
MS4A1	6.77616	2.76047	1.48906e-36
AGAP2	2.2791	1.18847	1.78157e-36
RGL4	2.49548	1.31932	1.79423e-36
RCSD1	2.18833	1.12983	1.86545e-36
INPP5D	2.08534	1.06028	2.12756e-36
FCRLA	4.19273	2.06789	2.50653e-36
FAM47E	0.343826	-1.54025	2.55776e-36
NCRNA00158	1.77111	0.824653	2.64867e-36
UPP1	2.05389	1.03836	2.87963e-36
APOBEC3C	2.17274	1.11951	3.02094e-36
CCRL2	1.90863	0.932539	3.03131e-36
FUT4	1.81037	0.856283	3.62683e-36
TTC8	0.593625	-0.752377	3.75822e-36
RAB42	1.95184	0.964831	4.12061e-36
RENBP	2.29367	1.19766	4.68117e-36
CCDC88B	2.48985	1.31606	5.64297e-36
IL18R1	2.43414	1.28341	5.89172e-36
RGS19	1.59122	0.670137	6.08791e-36
HLA-DRB6	3.16903	1.66404	7.53645e-36
SIGLEC9	1.99027	0.992963	7.77283e-36
MAN2B1	1.60184	0.679729	7.93047e-36
KIAA0125	4.45426	2.15519	1.03162e-35
IRF5	1.73787	0.797318	1.0746e-35
ARRB2	1.50052	0.585459	1.17099e-35
CD300E	2.20373	1.13995	1.18075e-35
F5	2.95445	1.56289	1.19544e-35
CDC20	2.59124	1.37364	1.37868e-35
FCRL2	3.70201	1.88831	1.38782e-35
UBA7	1.9132	0.935991	1.64266e-35
IPCEF1	2.47509	1.30748	1.77551e-35
ADCY7	1.91103	0.93435	2.39769e-35
APOC1	2.36276	1.24047	2.54061e-35
WIPF1	1.94654	0.960915	3.26229e-35
STK10	1.58732	0.666594	6.5724e-35
HMGA1	1.90319	0.928418	7.28491e-35
KBTBD8	2.11414	1.08007	7.60597e-35
VPREB3	3.30219	1.72343	8.26897e-35
NUP93	1.526	0.609755	8.35937e-35
KLRC3	2.79757	1.48418	9.23647e-35
PLEKHO2	1.61232	0.689134	1.04444e-34
RNF166	1.70153	0.766837	1.06613e-34
GPR97	2.64096	1.40106	1.25343e-34
MAPT	0.188457	-2.40769	1.27107e-34
SEMA7A	2.01941	1.01393	1.36895e-34
TLR9	2.34602	1.23021	1.46941e-34
IL10RB	1.36207	0.445801	1.51939e-34
CSF2RA	2.22742	1.15537	1.73925e-34
FGL2	2.37376	1.24718	1.81079e-34
SLC24A4	1.93816	0.954688	2.03173e-34
TUBA1C	1.618	0.69421	2.15698e-34
C6orf150	2.13762	1.09601	2.30213e-34
PNOC	3.30283	1.7237	2.77301e-34
PTTG1	2.25229	1.17139	3.0045e-34
GCH1	1.7789	0.830987	3.20048e-34
C2orf89	2.83866	1.50521	3.93508e-34
ICAM4	2.25552	1.17346	4.59798e-34
TNFRSF4	2.41609	1.27267	4.83308e-34
RUNDC1	0.602004	-0.732154	7.15104e-34
C16orf61	1.62462	0.700105	9.25089e-34
GLIPR2	2.24179	1.16465	1.05332e-33
ZNF396	0.508938	-0.974439	1.05397e-33
TMEM171	2.90214	1.53712	1.06481e-33
APBB1IP	2.06317	1.04486	1.08463e-33
ACSL5	2.26466	1.1793	1.19965e-33
TRIM26	1.36525	0.449164	1.20152e-33
TNFRSF17	4.28392	2.09893	1.21423e-33
2022-03-01	1.92851	0.947483	1.24602e-33
PLCG2	2.13616	1.09502	1.2765e-33
TCN2	1.85814	0.893859	1.3346e-33
CCNE1	2.8512	1.51157	1.89717e-33
PLCXD2	2.47523	1.30756	1.90875e-33
FAM172A	0.651562	-0.618025	2.48816e-33
GPBAR1	1.97123	0.979096	2.69662e-33
MEP1A	1.88288	0.912937	2.73194e-33
SUMF1	0.652849	-0.615179	3.16982e-33
ZNFX1	1.55458	0.636525	3.37124e-33
CD84	2.57414	1.36409	3.67531e-33
CCL4L2	2.56475	1.35882	3.91605e-33
TLR2	1.97536	0.982119	4.07003e-33
CYBA	2.28446	1.19185	4.46703e-33
HLA-DPB2	2.4606	1.29901	5.85149e-33
GAB3	1.92923	0.948028	5.93465e-33
SH3BGRL3	1.58205	0.661795	6.99612e-33
MYBL2	3.01181	1.59063	7.43833e-33
HVCN1	1.84973	0.887316	7.49616e-33
ARPC1B	1.73656	0.796233	7.95282e-33
IL28A	1.79129	0.840998	8.05122e-33
APOE	2.413	1.27083	8.61073e-33
PIF1	2.56069	1.35653	9.71496e-33
DNAJB11	1.47768	0.563332	9.76312e-33
C7orf63	0.408952	-1.29	1.38423e-32
FCAR	1.98367	0.988174	1.40987e-32
SHCBP1	2.14218	1.09908	1.46348e-32
RIPK2	1.67075	0.740496	1.52611e-32
PTPRO	2.06081	1.04321	1.69361e-32
TEX11	2.09239	1.06515	1.95062e-32
IKZF3	3.46317	1.79209	2.0902e-32
CCL11	2.78136	1.47579	2.13091e-32
RBM38	1.90529	0.930008	2.27118e-32
ARPC2	1.33063	0.412112	2.28521e-32
POU2F2	2.16671	1.1155	2.33537e-32
MKL2	0.553695	-0.852837	2.71943e-32
EFHD2	1.6843	0.752148	2.71981e-32
CD300C	1.9579	0.969305	2.96007e-32
C17orf60	1.95289	0.965614	3.01639e-32
HLA-DRB5	2.99851	1.58424	3.33725e-32
LRP8	2.46094	1.29921	3.8714e-32
WDR19	0.59978	-0.737496	4.52314e-32
TRIM14	1.60952	0.686626	4.84773e-32
MSL3	1.44493	0.531004	4.86683e-32
WNT1	1.86535	0.899443	5.1239e-32
VAMP5	1.81867	0.862887	5.18465e-32
KLRB1	3.28995	1.71806	5.45469e-32
EMP3	1.79259	0.842045	5.72737e-32
P2RX5	2.46241	1.30007	5.79006e-32
IRF7	2.14344	1.09993	5.88918e-32
CCR4	3.07223	1.61929	6.0523e-32
AURKB	2.55903	1.3556	7.0993e-32
TIGD6	0.70446	-0.50541	7.14282e-32
S1PR2	1.56439	0.645596	7.2739e-32
E2F2	2.25046	1.17022	9.06443e-32
CHAC1	2.54633	1.34842	1.00021e-31
CLECL1	2.28293	1.19088	1.06394e-31
TMEM26	0.27395	-1.86801	1.08697e-31
TACC3	1.84481	0.883474	1.11495e-31
ZDHHC18	1.40057	0.486013	1.28455e-31
MMP9	3.48303	1.80034	1.29879e-31
FAM179A	2.49973	1.32177	1.36484e-31
GPR31	1.73575	0.795559	1.38833e-31
KLHDC1	0.494964	-1.0146	1.39718e-31
CDCA5	2.17299	1.11968	1.55506e-31
KIF2C	2.32656	1.2182	1.74074e-31
FAM54A	2.21453	1.147	1.80294e-31
MRPS5	1.38595	0.47087	2.19615e-31
RRN3P2	1.83689	0.877265	2.27694e-31
LRRC33	1.74765	0.80542	2.34082e-31
PSMA4	1.38778	0.472783	2.37331e-31
MYB	0.336541	-1.57115	2.68792e-31
THSD4	0.268398	-1.89755	2.85193e-31
SLC25A19	1.63719	0.711224	3.02901e-31
VIPR1	0.431712	-1.21186	3.08712e-31
HMOX1	1.83595	0.876527	3.22489e-31
LRBA	0.545723	-0.87376	3.27925e-31
FAM161B	0.480253	-1.05813	3.36762e-31
C11orf75	2.05639	1.04012	3.7489e-31
C14orf45	0.508925	-0.974474	4.32643e-31
ICAM3	1.74639	0.804373	4.52364e-31
CDCA7	3.6781	1.87896	4.80564e-31
CD1B	3.13066	1.64647	5.12291e-31
CENPW	2.20802	1.14276	6.13421e-31
IL7R	3.84151	1.94167	6.13991e-31
CXCL16	1.73061	0.791277	6.74636e-31
MED8	1.33475	0.416568	6.74828e-31
KIR2DS4	2.10256	1.07215	7.14735e-31
GRK6	1.46924	0.555072	7.30535e-31
MGAT1	1.39688	0.48221	7.89335e-31
CALR	1.47696	0.562635	8.05815e-31
PLK1	2.26282	1.17812	8.32925e-31
NUB1	1.32958	0.410973	1.00212e-30
RHEBL1	1.99011	0.992845	1.01974e-30
PIM1	1.97402	0.981136	1.14597e-30
KARS	1.42678	0.512768	1.17375e-30
CENPA	2.46958	1.30427	1.17741e-30
FCHO1	2.81228	1.49174	1.18814e-30
C10orf54	1.89577	0.922782	1.30643e-30
KIF21B	2.16902	1.11704	1.32623e-30
CPVL	2.04747	1.03384	1.49082e-30
CENPN	1.84368	0.882586	1.51048e-30
ADAP2	1.61787	0.694093	1.55317e-30
SLC7A5	2.76184	1.46563	1.6581e-30
PTGR2	0.621652	-0.685822	1.85763e-30
PFKP	2.55054	1.3508	1.88262e-30
PARP10	2.02679	1.0192	2.03667e-30
ABCD1	1.69876	0.764483	2.15697e-30
TRANK1	1.7255	0.787015	2.18669e-30
DAZL	2.05023	1.03579	2.25515e-30
ABCD2	2.77839	1.47425	2.31258e-30
ST8SIA4	1.71369	0.777109	2.33406e-30
HAMP	2.4763	1.30818	2.42846e-30
FAS	1.94635	0.960769	2.46321e-30
OSM	2.45584	1.29622	2.47832e-30
GPR132	2.09512	1.06703	2.47832e-30
PSME1	1.51762	0.601807	2.58088e-30
TAPBPL	1.68609	0.753681	2.60901e-30
CEACAM4	1.92869	0.947625	2.62296e-30
GLUD1	0.682773	-0.550522	2.67486e-30
MELK	2.43626	1.28467	2.95115e-30
STK32B	0.264768	-1.9172	2.95115e-30
ACADSB	0.398743	-1.32647	3.05242e-30
EPHB2	1.94006	0.9561	3.05242e-30
DENND1C	1.69807	0.763896	3.09726e-30
KYNU	3.21582	1.68519	3.23406e-30
CR1	3.19488	1.67576	3.36609e-30
E2F4	1.39135	0.47649	3.46863e-30
RARRES1	4.07303	2.0261	3.79498e-30
DNAJC5B	2.60547	1.38154	4.16116e-30
C3AR1	1.87185	0.904464	4.41784e-30
CCL25	1.99567	0.996873	5.05584e-30
APPL2	0.667575	-0.582998	5.40668e-30
B3GNT7	2.26879	1.18193	5.73547e-30
LIME1	2.73869	1.45348	5.84197e-30
KDM4B	0.515195	-0.95681	5.85564e-30
TNFRSF13C	2.49977	1.3218	5.90651e-30
TRIM47	1.88516	0.914687	5.94807e-30
CLNK	1.79644	0.84514	7.08313e-30
PSMA5	1.38455	0.46942	7.0941e-30
FBXO36	0.524905	-0.929873	7.3409e-30
LRRC48	0.361951	-1.46613	7.73298e-30
IRAK1	1.62339	0.699012	8.31203e-30
CSF2	1.6962	0.762304	8.48803e-30
CDCA8	2.04053	1.02894	1.07105e-29
DTHD1	2.38451	1.2537	1.07885e-29
C10orf32	0.640133	-0.643557	1.09438e-29
BLK	3.95758	1.98462	1.10396e-29
ITM2C	2.1769	1.12227	1.16204e-29
DEF6	1.6823	0.750433	1.25957e-29
HHAT	0.522972	-0.935194	1.59514e-29
C10orf125	2.11792	1.08265	1.61267e-29
CDCA2	2.40659	1.26699	1.89659e-29
FLT3LG	1.95627	0.968105	2.50087e-29
SLC26A9	3.63616	1.86242	2.50566e-29
ECE2	1.84161	0.880969	2.63886e-29
PTAFR	2.21207	1.1454	2.70534e-29
KLRC4	2.20119	1.13828	2.74571e-29
NDC80	2.22426	1.15332	2.96365e-29
KCTD3	0.575419	-0.797315	2.97844e-29
BEND4	2.43307	1.28278	3.25162e-29
DGKG	2.01575	1.01132	3.25162e-29
CCNG2	0.575228	-0.797795	3.27843e-29
OBFC2A	1.85603	0.892224	3.33092e-29
NEDD4L	0.565156	-0.82328	3.8022e-29
NOD2	2.1817	1.12545	3.8455e-29
FTL	1.57829	0.658362	4.23035e-29
ARRDC5	1.96958	0.977888	4.26754e-29
DPPA4	1.692	0.758732	4.31784e-29
NECAP2	1.32023	0.400788	4.91777e-29
KLRC2	2.59549	1.376	5.14337e-29
CCNB2	2.15843	1.10998	5.41004e-29
RGS18	2.16063	1.11145	5.44594e-29
PLAUR	1.90083	0.926629	5.47503e-29
ACTR3	1.40291	0.48842	6.15673e-29
ARNTL2	2.87055	1.52133	6.19324e-29
PTK2B	1.68944	0.756544	6.22915e-29
LAT2	1.76327	0.818253	6.69332e-29
GTPBP2	1.38617	0.471105	7.21014e-29
SALL2	0.449907	-1.1523	7.36231e-29
ACOT9	1.65966	0.730889	7.38249e-29
MAPKSP1	0.738357	-0.43761	7.71649e-29
ME2	1.59868	0.67688	7.97786e-29
CYTH1	1.42885	0.514857	8.17682e-29
CCL17	2.98881	1.57957	8.4304e-29
GPR25	1.81217	0.857717	8.72886e-29
BBS1	0.6266	-0.674384	9.2287e-29
FRY	0.493512	-1.01884	9.43704e-29
DNAL1	0.608921	-0.715673	1.06896e-28
LOC284440	0.590957	-0.758874	1.09097e-28
STK17A	1.54327	0.625988	1.32251e-28
PIR	2.08666	1.0612	1.34865e-28
PFN1	1.42262	0.508546	1.57399e-28
LONRF2	0.238861	-2.06575	1.83179e-28
LILRP2	1.47405	0.559786	1.85396e-28
STAG3	2.49449	1.31875	1.88315e-28
RIN3	1.66066	0.731757	1.90467e-28
EIF4B	0.725158	-0.463633	1.91854e-28
TMEM51	1.53124	0.614701	2.20469e-28
CASP10	1.90886	0.932712	2.21996e-28
PVRIG	2.14862	1.10341	2.25357e-28
IKBKE	1.7094	0.77349	2.40931e-28
CNR2	2.58724	1.37141	2.53597e-28
EVI2A	1.89115	0.919261	2.74432e-28
CARD9	2.42633	1.27878	2.75867e-28
KIFC1	2.03631	1.02596	3.01233e-28
NAPSB	2.72833	1.44802	3.09734e-28
CTSZ	1.57383	0.654279	3.59935e-28
SLC39A6	0.336536	-1.57117	3.61866e-28
ART3	5.67447	2.50449	3.73975e-28
C5AR1	1.75683	0.812976	3.74954e-28
PSMD7	1.42576	0.511734	3.75957e-28
SLC9A9	1.84519	0.88377	3.77206e-28
UBE2C	2.4027	1.26465	3.96715e-28
CASC1	0.364017	-1.45792	4.01822e-28
ADAM19	2.01149	1.00826	4.50192e-28
IL22RA2	3.41272	1.77092	4.83123e-28
STAMBPL1	1.80249	0.849991	4.87131e-28
SLC12A3	2.4935	1.31817	5.17975e-28
SCUBE2	0.163975	-2.60846	5.32894e-28
CEP55	2.16257	1.11274	5.34559e-28
MYO7A	2.38046	1.25124	5.47032e-28
EFCAB6	0.415707	-1.26636	5.54265e-28
RPS6KA4	1.52932	0.612887	6.19538e-28
PSAT1	4.40431	2.13892	6.87545e-28
SPRED2	0.604917	-0.725191	7.27577e-28
ZBTB4	0.702301	-0.509839	7.63475e-28
CMKLR1	1.92461	0.944562	8.00736e-28
KIAA0232	0.633218	-0.659225	8.15304e-28
SPEF2	0.484046	-1.04679	9.15953e-28
DAPK1	2.07307	1.05177	9.58328e-28
C1R	1.97334	0.980638	1.01183e-27
COL4A4	2.67753	1.42091	1.04797e-27
HLA-DOA	2.20626	1.1416	1.04869e-27
ORC6L	2.22323	1.15266	1.06716e-27
BIN1	2.06409	1.04551	1.08434e-27
MSN	1.70015	0.765659	1.17691e-27
BUB1	2.17823	1.12315	1.24808e-27
ABCC8	0.159575	-2.6477	1.26826e-27
IL21	1.53359	0.616914	1.30542e-27
CDT1	2.13028	1.09104	1.35445e-27
LBR	1.76218	0.817365	1.36818e-27
ORC1L	2.17332	1.1199	1.41889e-27
ALDH6A1	0.555552	-0.848005	1.44405e-27
SPIC	1.56436	0.645576	1.60337e-27
RAET1K	2.15788	1.10962	1.66969e-27
CYB5D1	0.655637	-0.609032	1.70748e-27
ABCF1	1.32178	0.402482	1.82754e-27
HJURP	2.12826	1.08967	2.00638e-27
SIGLEC12	2.80355	1.48726	2.04307e-27
NFE2L3	2.0898	1.06337	2.04353e-27
C13orf18	2.04582	1.03268	2.09023e-27
CCL20	3.18214	1.67	2.09197e-27
HMSD	2.00873	1.00628	2.40763e-27
FCRL1	3.2133	1.68406	2.56988e-27
ATP8B1	0.528221	-0.920786	2.82648e-27
USP30	0.720982	-0.471964	3.06993e-27
SIRPB2	1.91293	0.935785	3.1841e-27
TNFSF9	2.19964	1.13727	3.34449e-27
PAX5	3.47204	1.79578	3.95623e-27
C1orf54	1.62467	0.700148	3.99607e-27
RABEP1	0.561291	-0.83318	4.16648e-27
CLSTN2	0.225225	-2.15056	4.18448e-27
TNFSF8	2.03887	1.02777	4.2333e-27
CREB3L3	1.7401	0.799169	4.2493e-27
SUGT1L1	0.605995	-0.722622	4.56054e-27
PDE11A	0.378237	-1.40264	4.71221e-27
PNPT1	1.40661	0.492219	4.78656e-27
MFSD2B	1.94065	0.95654	5.06469e-27
IFIT1B	1.4033	0.488821	5.42601e-27
EIF2S2	1.3597	0.443291	5.4534e-27
MMP12	5.00693	2.32393	5.50317e-27
HTATIP2	1.75754	0.813554	6.17213e-27
GMPR	2.13995	1.09758	6.60263e-27
PHF19	1.55842	0.640081	7.45722e-27
HLA-DQB2	2.80197	1.48644	7.46765e-27
NXPH3	0.341534	-1.5499	7.48371e-27
RASSF5	1.94439	0.959321	7.78965e-27
BTRC	0.630842	-0.664648	8.02774e-27
HSD11B1	2.60235	1.37982	8.25814e-27
PSMA3	1.38421	0.469062	8.68384e-27
IL12A	2.6975	1.43162	9.07924e-27
SCAMP1	0.676003	-0.564899	9.09052e-27
ERBB3	0.534682	-0.903247	9.3327e-27
A2ML1	7.01114	2.80965	9.54949e-27
NEURL3	2.60678	1.38227	9.74298e-27
TNFSF12-TNFSF13	4.24999	2.08746	1.10128e-26
IFT88	0.652722	-0.61546	1.13364e-26
CD33	1.77774	0.830044	1.2075e-26
C10orf79	0.364782	-1.45489	1.26078e-26
TMEM176B	2.19282	1.13279	1.28572e-26
CYB5D2	0.591263	-0.758128	1.38715e-26
MEGF9	0.533502	-0.906435	1.41809e-26
KIAA1737	0.694743	-0.52545	1.47375e-26
RRM2	2.15227	1.10586	1.48325e-26
TRAK1	0.680276	-0.555808	1.61216e-26
DNAH7	0.386614	-1.37103	1.6933e-26
IQCH	0.529204	-0.918105	1.81438e-26
MATK	2.81452	1.49289	1.86524e-26
C2orf85	1.74063	0.799607	1.90763e-26
KCNJ11	0.364085	-1.45765	2.1932e-26
KIR2DL1	1.78365	0.83483	2.22792e-26
TCF19	1.6917	0.75847	2.25617e-26
COQ7	0.689163	-0.537082	2.28832e-26
KIR3DX1	1.35794	0.441418	2.32384e-26
TOM1L2	0.622583	-0.683663	2.44594e-26
BANK1	3.16982	1.6644	2.62706e-26
PLEKHF1	2.18611	1.12837	2.69645e-26
GSG2	1.92788	0.947014	3.12316e-26
C5orf36	0.536295	-0.898902	3.12717e-26
TMEM30B	0.579512	-0.787089	3.42959e-26
IL28B	1.5302	0.613721	3.50686e-26
TNFRSF13B	2.98831	1.57933	3.51625e-26
CDKN3	1.92675	0.946166	3.80561e-26
DDX39	1.58358	0.663189	3.82481e-26
SKA1	2.17333	1.11991	4.06528e-26
GIMAP7	2.03657	1.02614	4.06528e-26
XBP1	0.426817	-1.22831	4.36558e-26
XCR1	2.04088	1.02919	4.4772e-26
CD209	2.38454	1.25371	5.02863e-26
ZNF785	0.671269	-0.575037	5.14772e-26
ERBB4	0.178422	-2.48663	5.14928e-26
GRIP2	2.09596	1.06761	5.25358e-26
GTSE1	2.06265	1.0445	5.62093e-26
MAGI1	0.594804	-0.749513	5.70856e-26
APH1B	0.580306	-0.785115	6.13728e-26
SNAI3	1.91376	0.936408	6.13728e-26
S100A8	5.81892	2.54075	6.2462e-26
ZC3H14	0.764103	-0.388162	6.2462e-26
C14orf72	1.93436	0.951855	6.3298e-26
CCDC30	0.543818	-0.878805	6.44348e-26
ARSG	0.412375	-1.27797	6.52674e-26
FAM129C	2.84775	1.50982	7.19188e-26
PPM1K	2.20442	1.1404	7.60324e-26
SLC1A3	1.90382	0.9289	7.85373e-26
LILRB5	2.46703	1.30277	8.30326e-26
CTPS	1.63618	0.710333	8.41303e-26
ANKRA2	0.670047	-0.577665	8.49277e-26
PTPN2	1.41046	0.49617	9.1653e-26
FOXA1	0.199586	-2.32492	9.20757e-26
SNRPA1	1.49159	0.576849	9.57515e-26
MOAP1	0.690813	-0.533633	9.57515e-26
TPX2	2.07382	1.05229	9.77453e-26
NEK5	0.35428	-1.49704	1.0148e-25
TMEM156	2.53513	1.34206	1.06968e-25
GLCE	0.590403	-0.760228	1.07047e-25
GTSF1	2.84949	1.5107	1.08201e-25
BRI3	1.46082	0.546778	1.12519e-25
INPP4B	0.374864	-1.41556	1.12532e-25
C15orf42	2.12073	1.08456	1.13162e-25
TOX2	2.1584	1.10996	1.16977e-25
IFT140	0.581567	-0.781982	1.19078e-25
BTN2A1	1.33784	0.41991	1.21835e-25
ENO1	1.61359	0.690274	1.23205e-25
DLGAP5	2.096	1.06764	1.32951e-25
FTSJD2	1.26733	0.34179	1.38828e-25
ANKRD22	2.26464	1.17928	1.40363e-25
RAD54L	2.11017	1.07736	1.41108e-25
AURKA	2.00292	1.00211	1.44702e-25
CLASP2	0.705028	-0.504248	1.45619e-25
DCTN4	0.722172	-0.469586	1.49818e-25
C17orf66	1.46263	0.548569	1.54205e-25
VAC14	1.33324	0.414933	1.54613e-25
KIAA0556	0.687897	-0.539736	1.58931e-25
ADAR	1.39178	0.476927	1.61931e-25
DACH1	0.234289	-2.09364	1.63557e-25
PAG1	1.78544	0.836283	1.64445e-25
MLPH	0.257166	-1.95923	1.64531e-25
LOC100130148	0.28162	-1.82818	1.65022e-25
KIAA1143	0.749535	-0.415933	1.86537e-25
EFHC1	0.623743	-0.680976	1.91378e-25
LPAR5	1.73907	0.798314	2.03474e-25
GSDMC	3.53431	1.82143	2.2088e-25
GLT25D1	1.40819	0.493843	2.27048e-25
AP1AR	0.683189	-0.549643	2.27939e-25
LRTOMT	0.608066	-0.717699	2.31138e-25
ADPRH	1.50686	0.591549	2.3742e-25
NCAPH	1.98139	0.986512	2.3742e-25
CSF1R	1.82528	0.868115	2.58232e-25
GPD1L	0.552795	-0.855183	2.67659e-25
TSPAN32	2.22231	1.15206	2.67775e-25
PMCH	1.79627	0.845001	2.68731e-25
TCTN1	0.650652	-0.620042	2.77067e-25
FOXM1	2.20008	1.13755	2.95173e-25
C14orf167	0.632511	-0.660838	3.13596e-25
ACY3	3.21896	1.68659	3.37917e-25
FPR1	1.99847	0.998895	3.46105e-25
PRLR	0.442558	-1.17606	3.55262e-25
ZFP2	0.569286	-0.812775	3.56612e-25
EMR1	2.13453	1.09392	4.33193e-25
ATG3	1.24812	0.319753	4.97175e-25
ADAM6	4.02652	2.00953	5.0285e-25
BBS5	0.673444	-0.570371	5.10818e-25
KIAA0831	0.750369	-0.414328	5.15445e-25
WDR35	0.654267	-0.612049	5.27802e-25
TUBB	1.42091	0.506811	5.49622e-25
LILRA4	2.72208	1.44471	5.52462e-25
SH3RF1	0.623109	-0.682443	5.54991e-25
SLC16A3	2.03713	1.02654	5.80066e-25
PSMA7	1.45434	0.540361	6.37371e-25
UBXN10	0.335716	-1.57469	6.71613e-25
KIF13B	0.502085	-0.993996	6.92425e-25
KIAA1467	0.385586	-1.37487	6.92606e-25
S100A4	1.86387	0.8983	7.01656e-25
MBLAC2	0.663985	-0.590778	7.51472e-25
EHD1	1.47422	0.559949	7.79424e-25
CDC45	2.17941	1.12394	7.93289e-25
SLFN14	1.60579	0.683282	8.18764e-25
CACNA2D2	0.31631	-1.66059	8.68888e-25
TGM2	1.92061	0.941565	9.54624e-25
CEBPB	1.83812	0.878228	9.61455e-25
ALS2CR8	0.640329	-0.643116	9.63401e-25
SLC39A9	0.713331	-0.487356	9.79853e-25
HLA-J	2.07364	1.05216	1.02319e-24
AFF3	0.231387	-2.11162	1.06625e-24
HBP1	0.769985	-0.377097	1.08054e-24
MEIS3P1	0.605564	-0.723649	1.08113e-24
SLC24A1	0.664603	-0.589435	1.11557e-24
ARL9	2.70596	1.43614	1.11557e-24
PSMD2	1.33813	0.420219	1.16825e-24
SERPING1	1.82091	0.864663	1.19021e-24
YBX1	1.56956	0.650359	1.2138e-24
NEK11	0.601986	-0.732197	1.25725e-24
BIRC5	2.31476	1.21086	1.3538e-24
MGC29506	3.46694	1.79366	1.39376e-24
FAM65B	2.38983	1.25691	1.42361e-24
GP1BA	2.39827	1.26199	1.43841e-24
FAM49B	1.48266	0.568184	1.48235e-24
TENC1	0.621962	-0.685101	1.53052e-24
PLA1A	2.32592	1.2178	1.56695e-24
CTSB	1.44941	0.535469	1.60886e-24
FYN	1.67066	0.740415	1.61268e-24
SCO2	1.51254	0.596978	1.65265e-24
LRIG1	0.564693	-0.824461	1.68971e-24
LOC100128977	0.287525	-1.79824	1.74745e-24
LRMP	2.17338	1.11994	1.84908e-24
RHOB	0.533205	-0.907238	1.93537e-24
FEN1	1.56646	0.647512	1.98331e-24
ZFYVE16	0.69633	-0.522157	2.03989e-24
FAM83D	2.26016	1.17642	2.12759e-24
PSMC2	1.25645	0.329357	2.25051e-24
MCM10	2.36047	1.23907	2.26089e-24
NUDT12	0.518469	-0.947671	2.32791e-24
CIAPIN1	1.3547	0.437975	2.44741e-24
CKLF	1.38366	0.468486	2.44746e-24
TMBIM6	0.723146	-0.46764	2.49173e-24
GARNL3	0.542799	-0.881511	2.54688e-24
C14orf174	0.448534	-1.15671	2.5616e-24
CYBRD1	0.455228	-1.13534	2.56903e-24
WNK4	0.176808	-2.49975	2.6781e-24
TBC1D9	0.352385	-1.50478	2.68003e-24
MTHFD1L	1.9451	0.959843	2.71036e-24
CCDC11	0.510675	-0.969523	2.74531e-24
ZMYND15	1.85816	0.893876	2.75175e-24
SDS	1.97056	0.978603	2.85144e-24
NR1H3	1.52569	0.609459	2.86516e-24
DNAJC12	0.275025	-1.86236	2.91645e-24
SETBP1	0.50472	-0.986444	3.29342e-24
CLEC2B	1.70514	0.769887	3.48742e-24
ZNF763	0.617881	-0.6946	3.52773e-24
KLHDC2	0.723881	-0.466176	3.615e-24
C9orf30	1.46805	0.553905	3.67983e-24
GPR19	2.181	1.12499	3.90238e-24
SYTL4	0.508579	-0.975455	3.9326e-24
ANKS1B	0.460738	-1.11798	3.94634e-24
FLJ36031	1.63209	0.70672	4.07915e-24
TTC23L	0.466222	-1.10091	4.1835e-24
NBR1	0.707135	-0.499942	4.28325e-24
EED	1.35969	0.443279	4.2885e-24
CCNA2	1.99043	0.993083	4.45975e-24
WDR78	0.52203	-0.937795	4.78706e-24
C6orf106	1.27331	0.348588	5.12343e-24
ERP44	1.3056	0.384717	5.29454e-24
KPNA2	1.71704	0.779921	5.48368e-24
DONSON	1.59495	0.673513	5.56151e-24
PIWIL4	2.01413	1.01015	5.5678e-24
IL26	1.3761	0.460583	5.61663e-24
TCTN2	0.662439	-0.59414	5.62098e-24
DNAJA1	1.35581	0.439157	5.62098e-24
SLC43A3	1.78443	0.835465	5.87526e-24
SPATA6	0.558901	-0.839335	6.07639e-24
ESR1	0.17127	-2.54566	6.80795e-24
ATF7	0.757307	-0.40105	7.21336e-24
ABP1	3.27507	1.71153	7.23326e-24
WASL	0.759262	-0.39733	7.5e-24
STIL	1.78427	0.835331	7.76175e-24
PPIL5	1.39465	0.479906	7.79894e-24
TTYH3	1.57456	0.65495	8.03825e-24
S100A9	5.21679	2.38316	8.06237e-24
SMAD5	0.709187	-0.495762	8.26133e-24
GPR81	0.321955	-1.63507	8.54899e-24
RERE	0.738259	-0.437802	8.74666e-24
STK38	1.4245	0.510457	8.92764e-24
ODF3B	1.92711	0.94644	9.06282e-24
EPB41L5	0.621937	-0.685161	9.39606e-24
ASGR2	1.90014	0.926105	9.39606e-24
KIAA1324	0.401064	-1.3181	9.45725e-24
IGF1R	0.411532	-1.28092	9.69087e-24
SLC7A8	0.416725	-1.26283	1.03398e-23
ITGAM	1.89919	0.925388	1.09483e-23
AICDA	1.94365	0.958772	1.10866e-23
LSP1	1.83641	0.876891	1.11099e-23
MGC12916	2.0427	1.03047	1.18657e-23
ANKRD30A	0.106459	-3.23164	1.24191e-23
APBA2	2.64428	1.40287	1.24861e-23
CT62	0.291972	-1.7761	1.25879e-23
OSTF1	1.30286	0.381684	1.25879e-23
ZNF259	1.34149	0.423836	1.27089e-23
FOXN2	1.58076	0.660618	1.30809e-23
TLR10	2.53638	1.34277	1.33469e-23
ZC3H6	0.66907	-0.579771	1.3414e-23
GTPBP8	1.33938	0.421569	1.3535e-23
LOC400027	0.682005	-0.552145	1.3581e-23
C16orf52	0.735748	-0.442717	1.36637e-23
GIMAP1	1.98289	0.987607	1.42502e-23
C9orf167	1.58559	0.665016	1.42992e-23
FCGR2A	1.63859	0.712455	1.45167e-23
CCL19	4.83838	2.27453	1.46635e-23
C1S	2.20787	1.14265	1.58268e-23
SPATC1	1.68764	0.755008	1.60799e-23
WDR93	0.45654	-1.13119	1.6232e-23
RAB39	2.10022	1.07054	1.64883e-23
DHX58	1.66259	0.73343	1.70294e-23
STC2	0.271255	-1.88228	1.70294e-23
ARFIP1	0.731926	-0.45023	1.70662e-23
SIRPA	1.70971	0.773751	1.74771e-23
DEPDC1B	2.0265	1.01899	1.91612e-23
MMP1	5.09017	2.34771	1.9815e-23
TSHR	2.10055	1.07077	2.01905e-23
HSF5	1.75138	0.808492	2.29673e-23
GSTCD	0.619656	-0.69046	2.43143e-23
TMSB10	1.70052	0.765979	2.59845e-23
NCK1	1.39239	0.477562	2.62024e-23
PTPRT	0.166122	-2.58968	2.65304e-23
CLDN12	0.678552	-0.559468	2.7024e-23
SIGLEC14	2.62398	1.39176	2.83863e-23
IL2	1.49898	0.583981	2.89467e-23
ZNF19	0.687395	-0.540788	2.99377e-23
SPATS2L	1.56136	0.642804	3.03464e-23
CBR3	1.98534	0.989388	3.05452e-23
DENND3	1.55844	0.640101	3.21283e-23
E2F8	2.34998	1.23265	3.2663e-23
OR52N4	1.6704	0.740198	3.30427e-23
PRDM1	1.73005	0.790818	3.40677e-23
CELSR1	0.463133	-1.1105	3.44331e-23
LOC100190938	0.382572	-1.3862	3.45488e-23
GTF2IRD2	0.68727	-0.541051	3.49124e-23
SPATA4	0.418738	-1.25588	3.49124e-23
PBX4	2.07255	1.0514	3.5399e-23
DPEP2	1.90691	0.93124	3.82729e-23
PNMA3	3.01863	1.59389	3.89873e-23
C4orf34	0.559183	-0.838608	4.1364e-23
WNT10B	2.21266	1.14578	4.62888e-23
SHROOM3	0.596966	-0.74428	4.85181e-23
PLTP	1.78815	0.838468	4.91434e-23
ZNF844	0.562496	-0.830086	5.01209e-23
PDCD5	1.48867	0.574024	5.07073e-23
CLEC2D	1.41616	0.50198	5.12316e-23
RYBP	0.750392	-0.414283	5.1946e-23
CA12	0.265819	-1.91148	5.31013e-23
PDGFD	0.5209	-0.940923	5.60106e-23
THRB	0.508088	-0.976851	5.76143e-23
LYAR	1.41235	0.4981	5.81994e-23
MAGI3	0.57537	-0.797439	6.23767e-23
CBX2	2.68394	1.42435	6.31751e-23
FAM49A	1.901	0.926757	6.62192e-23
STK17B	1.63266	0.707221	6.76965e-23
TNFAIP2	1.84212	0.881366	6.86041e-23
CLIC1	1.28443	0.361128	7.00369e-23
INTU	0.617847	-0.694679	7.10076e-23
ARL4C	1.83614	0.876672	7.78315e-23
CDCA3	1.9898	0.992626	8.06534e-23
PIK3CG	2.1303	1.09106	8.141e-23
CR2	4.59691	2.20067	8.22102e-23
MYO5C	0.571147	-0.808065	8.72877e-23
ZNF92	0.556599	-0.845289	9.32227e-23
FLJ39653	0.644565	-0.633602	9.9343e-23
EZH2	1.6909	0.757794	1.02772e-22
MYH6	1.69639	0.762464	1.04297e-22
APBB2	0.590174	-0.760787	1.0857e-22
INPP5J	0.377115	-1.40692	1.19947e-22
CCDC103	0.53433	-0.904198	1.21763e-22
CDC25A	2.02607	1.01868	1.33588e-22
RERG	0.375792	-1.41199	1.33806e-22
C1orf64	0.134276	-2.89673	1.34826e-22
PDIA6	1.40966	0.49535	1.45054e-22
NUDT5	1.45042	0.536475	1.73665e-22
SYK	1.73004	0.790809	1.85005e-22
TLR6	1.95526	0.967357	1.88733e-22
RFC4	1.53362	0.616944	1.95865e-22
ZFP14	0.704213	-0.505916	1.96013e-22
FANK1	0.468326	-1.09442	1.98459e-22
CAMK4	2.05759	1.04096	2.02307e-22
FBXL2	0.629277	-0.668233	2.04313e-22
MAGED2	0.552737	-0.855335	2.09802e-22
TRPM2	1.89362	0.92115	2.11948e-22
SLC22A5	0.593329	-0.753096	2.17546e-22
TBX3	0.427025	-1.22761	2.1767e-22
RASGRP2	2.40571	1.26646	2.21201e-22
SLC9A6	1.72896	0.789904	2.23298e-22
ARHGAP4	1.85728	0.893194	2.27093e-22
C3	2.20348	1.13978	2.27358e-22
FBXL17	0.678202	-0.560213	2.27376e-22
GPA33	1.87524	0.907075	2.29679e-22
DYNLRB2	0.388885	-1.36258	2.31934e-22
NCAPG	1.90599	0.930543	2.39792e-22
KIF20A	2.0321	1.02297	2.41545e-22
DDX26B	1.88853	0.917264	2.7137e-22
KTI12	1.28592	0.362806	2.73844e-22
RNF141	0.689014	-0.537395	2.9614e-22
ACHE	2.45536	1.29594	2.96337e-22
NXNL2	0.316025	-1.66189	3.1572e-22
TSPAN13	0.543448	-0.879787	3.16245e-22
WDR60	0.721114	-0.4717	3.25646e-22
DRAM1	1.59	0.669024	3.30779e-22
CASC2	0.611854	-0.708741	3.37181e-22
GPI	1.45267	0.538705	3.66219e-22
C1orf135	1.81342	0.858709	3.76682e-22
LSM6	1.34466	0.427239	3.93295e-22
ACOT7	1.58718	0.666464	3.93326e-22
EXO1	2.10159	1.07148	3.99012e-22
CLEC10A	3.1744	1.66648	3.99012e-22
OIP5	1.77405	0.827047	4.06254e-22
CEACAM21	2.01558	1.01119	4.10075e-22
GATAD1	0.755293	-0.404893	4.32016e-22
NPNT	0.365367	-1.45258	4.39718e-22
CLIC2	1.68108	0.749388	4.3975e-22
HS3ST1	1.67611	0.745113	4.78192e-22
ZNF814	0.629496	-0.66773	4.78192e-22
NOSTRIN	0.388563	-1.36378	4.8054e-22
RBM47	0.643125	-0.636828	4.81209e-22
C5orf39	1.79644	0.845139	5.1396e-22
SFRS12	0.752503	-0.410231	5.23692e-22
RNASE1	1.78982	0.839816	5.24038e-22
MOV10	1.35578	0.439121	5.39627e-22
HAUS8	1.4601	0.546071	5.49138e-22
ADPRHL2	1.34039	0.42265	5.6133e-22
HTR7P1	0.499225	-1.00224	5.70543e-22
C6orf153	1.30597	0.385121	5.75326e-22
MYO9B	1.32308	0.403902	6.31976e-22
ZNF280D	0.748712	-0.417516	6.4216e-22
ACVR2B	0.670455	-0.576788	6.48754e-22
DOCK8	1.78581	0.836578	6.72709e-22
CASZ1	0.63483	-0.655557	6.74315e-22
LRP2BP	0.624771	-0.678602	6.74584e-22
BCDIN3D	0.753938	-0.407483	6.7982e-22
FAM179B	0.657358	-0.605249	6.86651e-22
CCDC158	0.393003	-1.34739	7.17765e-22
ARHGAP32	0.59076	-0.759356	7.20192e-22
MKI67	1.99048	0.993114	7.29533e-22
RALGAPA1	0.681428	-0.553367	7.30829e-22
ZNF587	0.582111	-0.780635	7.82944e-22
MIAT	2.10611	1.07458	8.02743e-22
ATP1B3	1.47869	0.564321	8.07123e-22
FAM72B	1.98237	0.987225	8.35667e-22
ZNF552	0.465478	-1.10322	8.35667e-22
UTS2	2.14374	1.10013	8.52118e-22
HKR1	0.73083	-0.452392	8.94041e-22
ZNF24	0.701523	-0.511438	8.94041e-22
RNASE4	0.542581	-0.882089	9.07037e-22
TRIM23	0.694145	-0.526691	9.25698e-22
FAM174B	0.529282	-0.917892	9.27529e-22
HKDC1	1.93329	0.951056	9.39045e-22
REEP1	0.3538	-1.49899	9.64262e-22
FAM135B	0.2903	-1.78439	9.67477e-22
ARPC5L	1.33001	0.411433	9.75749e-22
SYTL5	0.218203	-2.19626	9.81161e-22
SRCIN1	0.443529	-1.1729	9.87835e-22
ZHX3	0.711516	-0.491033	1.07173e-21
PRDX4	1.46911	0.554944	1.11359e-21
MCM5	1.50818	0.592806	1.12844e-21
KLRG1	1.87955	0.910385	1.15585e-21
INADL	0.648935	-0.623855	1.16478e-21
FCGR2B	1.92272	0.943145	1.16524e-21
FMO5	0.355839	-1.49071	1.24978e-21
TCF7	1.98562	0.989592	1.26717e-21
CYLD	1.41536	0.501172	1.28024e-21
CBR4	0.674169	-0.568817	1.29101e-21
CD47	1.49147	0.576736	1.33775e-21
ST8SIA6	0.292171	-1.77512	1.41691e-21
UNC93B1	1.53333	0.616672	1.44119e-21
IGDCC3	0.236554	-2.07976	1.54391e-21
UBE3B	0.768607	-0.379681	1.59609e-21
C16orf45	0.429996	-1.2176	1.62481e-21
BET3L	1.41904	0.504911	1.71462e-21
C6orf97	0.337354	-1.56767	1.71681e-21
GTF2IRD2B	0.632409	-0.661071	1.77044e-21
STARD4	1.74301	0.801581	1.81623e-21
SLC5A6	1.67428	0.743537	1.91268e-21
ZNF709	0.704006	-0.506341	1.92221e-21
SLCO4A1	2.45319	1.29466	1.94881e-21
ZMYND10	0.3266	-1.6144	2.00235e-21
LOC284023	0.716832	-0.480293	2.03411e-21
CSTB	1.6021	0.67996	2.03732e-21
TROAP	2.04149	1.02962	2.04128e-21
KIF3A	0.670012	-0.577741	2.06564e-21
ISL2	2.15308	1.1064	2.10186e-21
CDHR1	2.45674	1.29675	2.13683e-21
SIRPD	1.3792	0.463827	2.18225e-21
COX4NB	1.34582	0.428482	2.21014e-21
METT5D1	0.735847	-0.442522	2.25271e-21
C9orf100	1.66354	0.734257	2.39444e-21
FAM198B	0.456537	-1.1312	2.42418e-21
IMPACT	0.721848	-0.470232	2.50172e-21
KIF4A	1.98974	0.992577	2.50564e-21
GBP7	1.77082	0.824419	2.50866e-21
THUMPD1	0.747578	-0.419704	2.51352e-21
C1orf203	0.641436	-0.640624	2.62255e-21
GRN	1.38533	0.470229	2.65786e-21
REEP5	0.68426	-0.547384	2.83574e-21
POLR2D	1.27579	0.351389	2.86437e-21
CAPN8	0.202165	-2.3064	2.91077e-21
TTC9C	1.27745	0.353271	3.11311e-21
PTGER4	1.80947	0.855566	3.11508e-21
ALG3	1.40934	0.49502	3.15818e-21
SEC14L2	0.390379	-1.35705	3.28959e-21
FKBP11	1.61902	0.695122	3.49003e-21
FMNL2	1.77107	0.824622	3.57066e-21
FBXL5	0.723844	-0.466249	3.65699e-21
HDHD2	0.75113	-0.412866	3.67826e-21
MDS2	1.47725	0.562914	3.95163e-21
RAD51	1.76827	0.822338	3.97542e-21
ELF4	1.47192	0.557696	4.05713e-21
IGF2BP2	2.93953	1.55559	4.24414e-21
ORAI1	1.45873	0.544713	4.30079e-21
ZMAT1	0.533407	-0.906692	4.40426e-21
PDSS1	1.53984	0.622778	4.47124e-21
TNIP1	1.30052	0.379094	4.50267e-21
OTUD7B	0.710868	-0.492347	4.50609e-21
BTN1A1	1.88655	0.91575	4.51464e-21
ELMOD2	0.710966	-0.492148	4.72868e-21
EPN2	0.724645	-0.464655	4.79763e-21
GALNT7	0.517712	-0.949779	4.87446e-21
THOC4	1.54205	0.624852	4.8822e-21
SMARCC2	0.809605	-0.304711	5.14182e-21
ANP32B	1.34792	0.430738	5.22026e-21
SCLT1	1.35285	0.436004	5.22493e-21
TTK	2.00946	1.0068	5.28219e-21
GRIN3A	1.58628	0.665651	5.34497e-21
PTPN6	1.4231	0.509033	5.35332e-21
2022-09-06	1.5256	0.609379	5.48441e-21
PTPLAD1	0.674934	-0.567181	5.55564e-21
PSMG1	1.50556	0.590297	6.0415e-21
FABP5	2.24183	1.16468	6.07403e-21
KIAA1370	0.550806	-0.860384	6.14889e-21
OGFR	1.54903	0.631364	6.29669e-21
NCOA7	1.8466	0.884873	6.41226e-21
LCMT2	0.73296	-0.448194	6.5964e-21
ZNF703	0.401268	-1.31736	6.66996e-21
SHD	1.72804	0.78914	6.70188e-21
NME5	0.316204	-1.66107	6.72322e-21
TMEM84	0.324039	-1.62576	6.84146e-21
AGR3	0.123375	-3.01888	7.20272e-21
AR	0.254112	-1.97647	7.37696e-21
PSAP	1.33868	0.420816	7.37994e-21
SUOX	0.710203	-0.493696	7.37994e-21
PBX1	0.574376	-0.799932	7.40411e-21
SNX8	1.39731	0.482651	7.44598e-21
UBN2	0.735872	-0.442473	7.67048e-21
CSNK1G3	0.730899	-0.452256	7.8143e-21
C14orf79	0.654983	-0.61047	7.8143e-21
TBC1D12	0.707992	-0.498195	7.8143e-21
SNRPG	1.37801	0.462587	8.09749e-21
HN1	1.65075	0.723123	8.29945e-21
FAM63A	0.608181	-0.717427	8.8903e-21
TRIM16	1.55209	0.634212	8.9723e-21
CEP68	0.766858	-0.382969	9.18493e-21
ARSD	0.639029	-0.646046	9.59039e-21
KCNK5	2.71016	1.43838	9.8015e-21
CCDC125	0.616372	-0.698127	1.00193e-20
IL20RB	1.9616	0.972032	1.04519e-20
NOVA1	0.268852	-1.89512	1.05688e-20
MRC1	2.41498	1.27201	1.06197e-20
RNF103	0.725832	-0.462292	1.10076e-20
GLI3	0.515441	-0.95612	1.11256e-20
S100A3	1.78632	0.836992	1.11338e-20
CASS4	1.87141	0.904125	1.13795e-20
CRY2	0.714228	-0.485544	1.18655e-20
N6AMT1	0.700929	-0.512659	1.19796e-20
LMNB1	1.6619	0.732833	1.21691e-20
RPH3AL	0.504034	-0.988407	1.23646e-20
GSTM3	0.37091	-1.43086	1.24505e-20
FAM110B	0.49178	-1.02391	1.24508e-20
ENTHD1	1.96552	0.974909	1.29193e-20
YARS	1.33548	0.417359	1.32623e-20
MGC72080	1.7844	0.835437	1.37313e-20
RNF8	1.33934	0.421521	1.37602e-20
RAB6C	0.604071	-0.727211	1.37659e-20
FLNB	0.633261	-0.659127	1.42083e-20
C5orf53	0.688923	-0.537585	1.44387e-20
EPR1	2.12472	1.08728	1.52683e-20
MFNG	1.71379	0.777188	1.55706e-20
RG9MTD2	0.728349	-0.457298	1.5756e-20
BBS4	0.676002	-0.5649	1.5756e-20
TBCK	0.71441	-0.485177	1.66282e-20
MYST4	0.574968	-0.798446	1.70758e-20
ACP5	1.7541	0.810731	1.74854e-20
RALGPS1	0.654109	-0.612396	1.8879e-20
KIAA1712	0.761017	-0.394	1.88968e-20
SUV39H1	1.35086	0.433883	1.90945e-20
BCAM	0.486597	-1.0392	1.91664e-20
CHI3L1	3.50116	1.80783	1.92036e-20
ERI2	0.697837	-0.519039	1.94393e-20
TMEM180	1.54759	0.630027	1.96257e-20
DCPS	1.3945	0.479747	2.01947e-20
BTF3	0.735442	-0.443317	2.02692e-20
DNALI1	0.278916	-1.8421	2.10112e-20
DOCK1	0.68658	-0.542501	2.14097e-20
BTBD7	0.733182	-0.447756	2.22426e-20
GM2A	1.37951	0.464154	2.22659e-20
MARS	1.25971	0.333088	2.27227e-20
PTTG3P	1.58898	0.668101	2.29345e-20
SHKBP1	1.36721	0.451235	2.33204e-20
SPDEF	0.273539	-1.87018	2.35657e-20
ATG2B	0.711623	-0.490815	2.51176e-20
ARID2	0.711011	-0.492055	2.51176e-20
C9orf139	1.78986	0.839849	2.57243e-20
DEGS2	0.291664	-1.77762	2.65703e-20
VNN1	2.01758	1.01263	2.68134e-20
MPP7	0.481841	-1.05337	2.68138e-20
PSMD14	1.28056	0.356772	2.75404e-20
BCL11A	3.62132	1.85652	2.77204e-20
SLC38A5	2.22378	1.15301	2.84118e-20
NDFIP1	0.768293	-0.380272	2.89633e-20
HMHA1	1.69429	0.760684	2.90868e-20
ARHGAP22	1.83177	0.873236	3.00521e-20
UQCRHL	1.50248	0.587348	3.0377e-20
FXYD7	1.86685	0.900605	3.0377e-20
CIRBP	0.656598	-0.606917	3.03862e-20
CYP20A1	0.801407	-0.319393	3.15172e-20
IL16	1.77715	0.829568	3.16511e-20
LOC344595	0.587207	-0.76806	3.19514e-20
AGMAT	1.73579	0.795591	3.21014e-20
ZCWPW2	0.636741	-0.651222	3.33354e-20
CKS2	1.62814	0.703225	3.4286e-20
ZNF621	0.745073	-0.424546	3.61044e-20
FBXO38	0.75248	-0.410275	3.75867e-20
CHAC2	1.6161	0.692514	3.78232e-20
CPEB2	0.563514	-0.827476	3.89195e-20
ARAP2	1.77747	0.829824	3.94958e-20
TMEM232	0.427106	-1.22734	3.98376e-20
JSRP1	2.84996	1.51094	4.02166e-20
ABT1	1.28328	0.359838	4.19491e-20
SLC35E2	0.698079	-0.518537	4.28957e-20
ARHGAP27	1.46458	0.550483	4.35376e-20
CDC123	1.36646	0.450445	4.35546e-20
ITGA4	1.80674	0.853386	4.47679e-20
RHCG	3.67672	1.87842	4.52203e-20
LOC441204	0.520371	-0.942389	4.61511e-20
RAB5B	0.805101	-0.312758	4.72449e-20
MORN4	0.674781	-0.567508	4.9138e-20
HESX1	1.56855	0.649431	4.98371e-20
ABCD3	0.652679	-0.615555	5.01242e-20
SPC24	1.97828	0.984245	5.02056e-20
ULK4	0.590959	-0.758871	5.29093e-20
TMEM144	0.605243	-0.724414	5.36868e-20
NUBPL	0.71603	-0.481908	5.41549e-20
ACVR1B	0.727771	-0.458444	5.4867e-20
C19orf28	1.4028	0.488313	5.50062e-20
MCM6	1.46284	0.548775	5.57447e-20
HTR3A	2.38027	1.25112	5.59627e-20
RNASEH1	1.34685	0.429588	5.73669e-20
SLFN11	1.68794	0.755266	5.78191e-20
MATN3	0.397052	-1.3326	5.91691e-20
MMP7	3.82927	1.93707	5.95329e-20
TRAF3IP1	0.768397	-0.380077	6.05157e-20
PPP2R2B	2.00318	1.00229	6.14963e-20
PTGDS	2.87652	1.52433	6.34921e-20
HNRNPH2	0.77638	-0.365165	6.39163e-20
MYBPC2	2.24577	1.16721	6.61147e-20
PREB	1.24845	0.320137	6.62274e-20
E2F1	1.82395	0.867069	6.65047e-20
WDR65	0.41626	-1.26444	6.83428e-20
CHEK1	1.59762	0.675923	6.93239e-20
CASD1	0.579088	-0.788145	6.93933e-20
PREPL	0.73526	-0.443674	7.00641e-20
HECTD2	0.608183	-0.717424	7.13086e-20
ATP6AP1L	0.610512	-0.711908	7.23256e-20
ABAT	0.383784	-1.38163	7.25981e-20
CELF2	1.81898	0.863126	7.48913e-20
C6orf115	1.59961	0.67772	7.50458e-20
ASGR1	1.78764	0.838059	7.6691e-20
LDHB	2.11735	1.08226	7.69049e-20
RPS2P32	1.76326	0.818247	7.88064e-20
YEATS2	1.40235	0.487848	7.93032e-20
FCER2	2.98435	1.57742	7.95929e-20
CFP	2.09327	1.06576	7.95929e-20
RASGRF1	2.64591	1.40376	8.21409e-20
PIGV	0.736713	-0.440825	8.49987e-20
DTWD2	0.657137	-0.605735	8.55908e-20
FAM64A	1.98688	0.990505	8.58892e-20
LY86	1.59626	0.674694	8.62247e-20
CMBL	0.439909	-1.18472	8.68743e-20
FLJ40330	2.59326	1.37477	8.68743e-20
DERL3	2.14962	1.10408	9.02808e-20
C1orf168	0.314324	-1.66968	9.13576e-20
LTK	2.14533	1.1012	9.20767e-20
GTF2IRD2P1	0.688747	-0.537953	9.48127e-20
FAM58A	1.40839	0.494044	9.60119e-20
PRAM1	1.81059	0.856463	1.00045e-19
C16orf80	1.28999	0.367363	1.00085e-19
PIK3R6	1.63793	0.711872	1.00219e-19
PNP	1.52088	0.604904	1.02147e-19
ZNF491	0.660506	-0.598356	1.0758e-19
SLC32A1	1.33703	0.419036	1.09591e-19
AKR1B1	1.59924	0.677386	1.1039e-19
MCF2L2	1.90523	0.929962	1.1044e-19
KIAA1407	0.62215	-0.684665	1.12302e-19
MTMR10	0.747216	-0.420402	1.13362e-19
KIF18B	1.98486	0.989035	1.13739e-19
GALM	1.66046	0.731586	1.14723e-19
ENTPD5	0.545427	-0.874543	1.16633e-19
LOC389634	1.74589	0.803966	1.17414e-19
TMSL3	1.50201	0.586897	1.19752e-19
PER2	0.684546	-0.546781	1.19866e-19
GLRB	0.41823	-1.25763	1.28359e-19
RASEF	0.404029	-1.30747	1.29522e-19
DUS2L	1.36172	0.445427	1.32776e-19
ZNF497	0.664032	-0.590676	1.32908e-19
KIAA1524	1.76624	0.820682	1.40081e-19
UBE2S	1.72475	0.786388	1.4588e-19
SCN4B	0.483438	-1.0486	1.48594e-19
VAV3	0.461467	-1.1157	1.49709e-19
ICAM2	1.64128	0.714825	1.50334e-19
CTDSPL	0.733017	-0.448082	1.51245e-19
TAPT1	0.678179	-0.560261	1.51932e-19
CDKN2D	1.54041	0.623311	1.55078e-19
SPOPL	0.655983	-0.608269	1.56194e-19
CCNB1	1.60721	0.684558	1.56898e-19
EXOC6	0.666447	-0.585439	1.57745e-19
TMEM168	0.764431	-0.387541	1.60137e-19
CALCOCO1	0.722499	-0.468933	1.62637e-19
TTC3	0.737287	-0.439702	1.63234e-19
BLM	1.7477	0.805456	1.63834e-19
TNFRSF25	2.03911	1.02794	1.68087e-19
L3MBTL4	2.4088	1.26832	1.6988e-19
PLIN2	1.68227	0.750412	1.73474e-19
TRIM45	0.597713	-0.742476	1.74692e-19
CLEC12B	1.49701	0.582082	1.78363e-19
HIST1H2BJ	2.23992	1.16345	1.81054e-19
SOCS6	0.689403	-0.536581	1.8257e-19
ELP2	0.575176	-0.797924	1.85898e-19
CHAF1B	1.52688	0.610585	1.88266e-19
GSTO1	1.30523	0.384309	1.95153e-19
DNAJC16	0.746543	-0.421702	1.96179e-19
WDR20	0.802004	-0.318319	2.07506e-19
CORO1C	1.38992	0.474998	2.08755e-19
C6orf62	1.2591	0.332391	2.13003e-19
KIAA1267	0.76195	-0.392232	2.13646e-19
C20orf24	1.39274	0.477927	2.15008e-19
P2RY14	1.71947	0.781961	2.2121e-19
PHYHD1	0.318593	-1.65021	2.24622e-19
DYSF	1.51885	0.60298	2.26428e-19
RFX5	1.32885	0.410182	2.32157e-19
LOC440896	1.56341	0.644699	2.36994e-19
LSM2	1.37096	0.455189	2.37867e-19
IL27RA	1.93138	0.949635	2.46302e-19
PATZ1	0.717093	-0.479768	2.52608e-19
GLIPR1L2	0.507222	-0.97931	2.56851e-19
CRIPAK	0.649061	-0.623575	2.65178e-19
CXCL1	3.17792	1.66808	2.66948e-19
NBEA	0.463071	-1.11069	2.75262e-19
COQ9	1.32619	0.407287	2.78398e-19
PSMA2	1.25005	0.321983	2.83729e-19
RGS5	0.518866	-0.946565	2.84036e-19
LOC647979	0.747674	-0.419519	2.96655e-19
NASP	1.40022	0.485658	3.10724e-19
CYBASC3	1.29581	0.373855	3.14331e-19
GARS	1.34548	0.428116	3.24028e-19
C7orf41	0.614801	-0.701807	3.26788e-19
FNBP1	1.38982	0.474895	3.28058e-19
NIP7	1.3439	0.426425	3.32461e-19
PLEKHA6	0.574037	-0.800783	3.43608e-19
SEMA3F	0.625731	-0.676385	3.44795e-19
SLC6A12	1.92494	0.944812	3.51275e-19
FLJ36777	0.581241	-0.782793	3.53789e-19
DBF4	1.44987	0.53592	3.53912e-19
WWP1	0.575527	-0.797043	3.71245e-19
SERPINA11	0.194444	-2.36258	3.7673e-19
ZNF429	0.68728	-0.541029	3.80044e-19
SYNPO2L	0.26688	-1.90574	3.83247e-19
CCND3	1.33041	0.411869	3.85284e-19
JAKMIP2	2.04211	1.03006	4.10701e-19
PEX12	0.700469	-0.513607	4.13109e-19
MTX3	0.705891	-0.502482	4.14745e-19
GIGYF2	0.792972	-0.334659	4.16674e-19
BID	1.41757	0.503418	4.21873e-19
PRRT3	0.522149	-0.937468	4.26067e-19
KRT86	2.79308	1.48186	4.37622e-19
OR4C6	1.35067	0.433673	4.39834e-19
AKAP9	0.642661	-0.637871	4.43508e-19
ATP1A2	0.327353	-1.61108	4.497e-19
CPNE5	1.96665	0.97574	4.58059e-19
DIAPH1	1.28745	0.364521	4.71679e-19
C5orf40	1.31738	0.397673	4.77637e-19
FSD1	2.43693	1.28507	4.98681e-19
LOC145837	0.305858	-1.70906	5.0137e-19
TCEAL1	0.568894	-0.813769	5.02936e-19
PHOSPHO2	0.632414	-0.661058	5.05643e-19
GRLF1	0.698646	-0.517366	5.17715e-19
DYNC1I2	0.768779	-0.37936	5.21055e-19
IQCK	0.684215	-0.547478	5.27907e-19
GPR82	1.7876	0.838025	5.3795e-19
FCRL4	1.86456	0.898837	5.50456e-19
SLC16A6	0.341241	-1.55114	5.52967e-19
TMEM176A	2.02244	1.0161	5.56105e-19
PRKAB1	0.773202	-0.371082	5.60425e-19
GAB1	0.674473	-0.568167	5.74206e-19
FLJ33630	0.718956	-0.476025	5.78682e-19
ZNF438	1.29514	0.373111	5.84399e-19
MRPS22	1.23458	0.304022	5.87424e-19
RANBP3L	0.325285	-1.62022	5.87424e-19
CENPO	1.48207	0.567613	6.03327e-19
C15orf27	1.64734	0.720134	6.13693e-19
C1orf21	0.525028	-0.929534	6.19526e-19
TRIM5	1.46433	0.550239	6.48464e-19
PRICKLE2	0.568147	-0.815664	6.87518e-19
C14orf182	1.86246	0.89721	6.954e-19
GALNS	1.45162	0.537662	7.2184e-19
EML4	1.3728	0.457119	7.26331e-19
KSR2	0.425874	-1.2315	7.2687e-19
ASF1B	1.65741	0.728933	7.41442e-19
MPO	1.74935	0.806817	7.42247e-19
KCND3	0.324316	-1.62453	7.56485e-19
RNF130	1.28796	0.365092	7.63945e-19
LOC100133669	2.14154	1.09865	7.8583e-19
PRKX	1.84074	0.880288	7.90842e-19
SEC22C	0.789312	-0.341332	8.00397e-19
CPEB4	0.619362	-0.691146	8.09127e-19
MRPL47	1.32975	0.411154	8.17335e-19
C12orf72	0.701423	-0.511644	8.31672e-19
IL1B	2.03769	1.02694	8.36459e-19
CXCR4	1.69979	0.765357	8.37047e-19
FAM136A	1.33845	0.420558	8.40042e-19
PGR	0.187059	-2.41843	8.56291e-19
SNRPC	1.32291	0.403716	8.64785e-19
HIST1H1B	1.66578	0.736194	8.76296e-19
STAM2	0.756959	-0.401712	8.90634e-19
SOAT1	1.55862	0.640272	9.10061e-19
NAV3	0.41358	-1.27376	9.19454e-19
C9orf68	0.452096	-1.1453	9.42016e-19
ASB14	0.690805	-0.53365	9.54314e-19
ANLN	1.95353	0.966082	9.62466e-19
PCSK4	0.429121	-1.22054	9.77033e-19
RNF114	1.30649	0.385695	1.02798e-18
SKA3	1.84193	0.88122	1.0322e-18
APOBEC3B	2.32544	1.2175	1.04268e-18
DCDC1	0.476976	-1.06801	1.07387e-18
UCHL1	2.3798	1.25084	1.0931e-18
CPLX1	0.497694	-1.00667	1.12509e-18
CD1A	2.95275	1.56206	1.12761e-18
ZNF441	0.682203	-0.551727	1.15649e-18
CCDC40	0.513887	-0.960477	1.19208e-18
ZNF425	0.663329	-0.592203	1.19242e-18
ZNF483	0.540684	-0.887141	1.19579e-18
ZNF280B	2.29197	1.19659	1.26153e-18
RTN4RL1	0.440225	-1.18369	1.30098e-18
IKZF5	0.752251	-0.410715	1.30414e-18
KIF5C	0.395291	-1.33901	1.31003e-18
TPCN1	0.729558	-0.454906	1.31003e-18
LIMA1	0.659663	-0.6002	1.34771e-18
ELOVL5	0.563294	-0.828039	1.47595e-18
ATF5	1.40139	0.486861	1.478e-18
RRAGD	1.80155	0.849238	1.48151e-18
RCOR3	0.715082	-0.483819	1.51741e-18
REEP6	0.336014	-1.5734	1.54345e-18
POGZ	0.761641	-0.392817	1.57089e-18
ASTN2	0.472787	-1.08074	1.61946e-18
PCBD2	0.721397	-0.471134	1.62318e-18
DYNC2LI1	0.764594	-0.387234	1.65148e-18
TTC18	0.471055	-1.08603	1.77078e-18
ST8SIA1	2.30739	1.20626	1.78692e-18
DMXL1	0.679786	-0.556848	1.80026e-18
SLC19A2	0.576094	-0.795624	1.8034e-18
NPAS1	0.467713	-1.0963	1.82559e-18
DCAKD	0.726166	-0.461629	1.85508e-18
C1orf27	0.724933	-0.464081	1.88003e-18
CHFR	1.29079	0.368255	1.91164e-18
AARS	1.38975	0.474829	1.94976e-18
NT5C3	1.33784	0.419904	2.05701e-18
MND1	2.0099	1.00713	2.05701e-18
SCN7A	0.343731	-1.54065	2.11306e-18
ALG10B	0.672637	-0.5721	2.11891e-18
RRN3P1	1.85997	0.895279	2.12819e-18
IRAK2	1.63449	0.708837	2.13794e-18
ODC1	1.67762	0.746413	2.29093e-18
C10orf93	0.3888	-1.3629	2.29093e-18
MIIP	1.47447	0.5602	2.32641e-18
WDR52	0.589722	-0.761893	2.39578e-18
PKP4	0.764918	-0.386622	2.40652e-18
AGR2	0.185469	-2.43075	2.41775e-18
NUF2	1.93502	0.952349	2.46306e-18
C2orf63	0.666989	-0.584264	2.49635e-18
ZNF776	0.694399	-0.526164	2.54143e-18
ADCY6	0.690062	-0.535201	2.58324e-18
PPIL1	1.31449	0.394502	2.58966e-18
DYNC2H1	0.537865	-0.894684	2.61419e-18
SLCO2B1	1.6819	0.750095	2.61892e-18
GREB1	0.332083	-1.59038	2.78671e-18
SGOL1	1.97073	0.978733	2.78671e-18
NUMA1	0.725619	-0.462716	2.86636e-18
AFF4	0.688434	-0.538609	2.9462e-18
TFF3	0.162058	-2.62541	2.95598e-18
CKS1B	1.50598	0.590706	2.96074e-18
PPPDE2	1.35644	0.439828	2.96074e-18
GJD3	1.68065	0.74902	2.97357e-18
CROT	0.546076	-0.872828	3.02265e-18
C5orf30	0.604195	-0.726914	3.09252e-18
PLA2G4A	2.11852	1.08306	3.11931e-18
C6orf211	0.48746	-1.03664	3.13503e-18
COG7	0.766731	-0.383207	3.18075e-18
C1QTNF7	0.424924	-1.23472	3.28531e-18
CLCN5	1.51596	0.600228	3.54939e-18
B3GNT5	2.13575	1.09474	3.60216e-18
GAMT	0.451645	-1.14674	3.60492e-18
LYPD6	0.34697	-1.52712	3.70569e-18
NUDT4	0.697257	-0.520237	3.72004e-18
PJA2	0.714909	-0.484169	3.74879e-18
CAB39L	0.602733	-0.730409	3.8659e-18
CHD3	0.746697	-0.421406	3.9026e-18
CCDC69	1.8023	0.849837	3.91458e-18
UQCRH	1.41845	0.504319	3.93768e-18
DCUN1D5	1.41656	0.502393	4.07415e-18
TTC30A	0.650854	-0.619594	4.15685e-18
STK36	0.695667	-0.523531	4.20041e-18
PKD2L1	1.64446	0.717616	4.23234e-18
CNTD1	0.575079	-0.798169	4.24266e-18
C20orf26	0.421535	-1.24628	4.2804e-18
LY75	2.04186	1.02988	4.3295e-18
SEPSECS	0.707952	-0.498276	4.40149e-18
BTNL8	1.62098	0.696865	4.40149e-18
GLRX	1.639	0.712815	4.53042e-18
LOC285830	1.64926	0.721822	4.53606e-18
C1orf106	3.14101	1.65123	4.53784e-18
NEK10	0.252941	-1.98313	4.60465e-18
MICAL1	1.5219	0.605876	4.75221e-18
PRTG	0.448206	-1.15777	4.85554e-18
MYRIP	0.388608	-1.36361	4.93642e-18
C13orf34	1.44879	0.534852	4.93695e-18
NDUFA9	1.31739	0.397687	5.26912e-18
CENPM	1.69796	0.763803	5.50864e-18
C6orf217	0.559277	-0.838366	5.52031e-18
RARRES3	2.23766	1.16199	5.62122e-18
PPM1A	0.775129	-0.367492	5.66323e-18
CLCN4	2.14015	1.09771	5.70244e-18
CHODL	2.865	1.51853	5.73865e-18
AK2	1.27134	0.346347	5.73865e-18
STH	0.766892	-0.382904	5.74558e-18
CCM2	1.34635	0.429048	5.99089e-18
ACER2	0.511717	-0.966583	6.12146e-18
MAGOH	1.38061	0.465308	6.12271e-18
ZNF720	0.745575	-0.423575	6.15156e-18
RAD51AP1	1.69963	0.765218	6.15964e-18
TNRC6A	0.777895	-0.362352	6.20152e-18
LMNB2	1.44943	0.535489	6.56271e-18
HCCS	1.27599	0.351617	6.66709e-18
MED13L	0.626038	-0.675677	6.87642e-18
TMEM25	0.612426	-0.707393	6.99743e-18
RAB33B	0.748355	-0.418205	7.2266e-18
C14orf148	0.640943	-0.641731	7.3895e-18
SUCNR1	1.97637	0.98285	7.45991e-18
GATA3	0.367111	-1.44571	7.54882e-18
ZBTB41	0.669135	-0.579632	7.5645e-18
TARP	2.80015	1.4855	7.61118e-18
TTC28	0.663279	-0.592313	7.63337e-18
SNORD116-28	0.467042	-1.09838	7.81865e-18
XPNPEP1	1.26024	0.333694	7.87587e-18
AHNAK	0.620156	-0.689296	7.97916e-18
DNAH5	0.36515	-1.45344	8.01231e-18
C4orf7	6.16475	2.62404	8.06902e-18
PCDH1	0.651593	-0.617957	8.1507e-18
IRS1	0.502704	-0.992219	8.20939e-18
UNC119B	0.677131	-0.562494	8.43539e-18
RAB35	1.19722	0.25969	8.6197e-18
SEMA5A	0.531093	-0.912964	8.94702e-18
CD82	1.81039	0.856298	8.98875e-18
SMC1B	2.94138	1.55649	9.0055e-18
LRRC17	0.418858	-1.25547	9.00586e-18
PSME4	1.39581	0.481102	9.08822e-18
IKBKB	0.668914	-0.580108	9.22556e-18
FAM196A	0.270633	-1.88559	9.3585e-18
TYMS	1.69905	0.764731	9.67274e-18
AFTPH	0.790105	-0.339883	9.73318e-18
MCCC2	0.604748	-0.725595	9.74882e-18
RUFY2	0.768743	-0.379426	9.77195e-18
NFIL3	1.71906	0.781623	9.78093e-18
GIN1	0.768934	-0.379068	1.00498e-17
WDFY3	0.707695	-0.498799	1.01618e-17
FCAMR	2.19523	1.13437	1.03652e-17
ALOX5AP	1.65858	0.729951	1.05281e-17
FLJ45983	0.269892	-1.88955	1.05281e-17
TDRD7	1.35616	0.439532	1.0557e-17
SHC2	0.458657	-1.12451	1.05748e-17
PATL1	1.34369	0.426198	1.07325e-17
ELMO1	1.56182	0.643228	1.07581e-17
ACTB	1.31599	0.396146	1.07668e-17
RAPGEF4	0.578319	-0.790064	1.07754e-17
ARPC5	1.28144	0.357771	1.0776e-17
NUSAP1	1.69632	0.762412	1.09582e-17
ENPP1	0.484877	-1.04431	1.10798e-17
SLC26A3	0.283057	-1.82084	1.11219e-17
KIF19	2.34165	1.22753	1.12739e-17
TLE4	1.70064	0.766076	1.13477e-17
FAM72A	1.96161	0.972037	1.13477e-17
C2orf73	0.557322	-0.843417	1.16634e-17
MICB	1.81929	0.863379	1.18877e-17
NUDT1	1.51454	0.59888	1.19337e-17
C5orf33	0.758217	-0.399317	1.20183e-17
FAM174A	0.669294	-0.579288	1.20343e-17
GPRASP2	0.670913	-0.575803	1.23085e-17
RNF145	1.64576	0.718753	1.23085e-17
IGBP1	0.772768	-0.371892	1.23964e-17
CDON	0.554799	-0.849962	1.26686e-17
NPHP1	0.635331	-0.65442	1.38102e-17
TMEM128	0.777781	-0.362563	1.43018e-17
ANKRD42	0.681762	-0.55266	1.43852e-17
SCPEP1	1.62127	0.697125	1.46552e-17
MTERFD3	0.723304	-0.467327	1.47895e-17
FLI1	1.52879	0.612391	1.53105e-17
LOC148696	0.510686	-0.969492	1.5344e-17
ZNF236	0.727906	-0.458175	1.54661e-17
KIF12	0.352234	-1.50539	1.59007e-17
ITPR1	0.520974	-0.940717	1.60182e-17
MAP3K1	0.615216	-0.700835	1.60704e-17
SPC25	1.65126	0.723567	1.63239e-17
PEX19	0.780641	-0.357268	1.67026e-17
MT1H	2.17635	1.12191	1.68226e-17
TADA2B	0.763917	-0.388513	1.76591e-17
EPHB6	2.37048	1.24518	1.77503e-17
PEX7	0.722628	-0.468674	1.78072e-17
TMEM192	0.718413	-0.477115	1.796e-17
MTA2	1.26502	0.339157	1.81014e-17
ZNF740	0.757643	-0.400409	1.82724e-17
CSTA	2.32494	1.21719	1.84181e-17
STARD13	0.661953	-0.595199	1.84181e-17
LPIN1	1.61422	0.690835	1.84272e-17
P2RX1	2.22234	1.15208	1.86505e-17
OPCML	0.467369	-1.09736	1.86936e-17
PPP1R3C	0.380419	-1.39434	1.8807e-17
PRELID1	1.31135	0.391055	1.8833e-17
RCC1	1.45125	0.537292	1.89323e-17
SNORD116-20	0.546238	-0.872398	2.00114e-17
ABCG2	0.521666	-0.938802	2.02565e-17
PRKD2	1.27968	0.355783	2.05159e-17
ELF2	0.809601	-0.304717	2.12551e-17
AGAP11	0.529294	-0.917859	2.18462e-17
IFT81	0.729713	-0.454598	2.21523e-17
COL4A3	2.29187	1.19652	2.22683e-17
GABBR2	3.40049	1.76574	2.23072e-17
WDR62	1.68773	0.755083	2.31153e-17
CKAP2L	1.86444	0.898739	2.31489e-17
AKR7A3	0.277935	-1.84718	2.36828e-17
DNMBP	0.582637	-0.779331	2.43173e-17
GALT	1.45907	0.545048	2.47635e-17
LMX1B	0.433072	-1.20732	2.49356e-17
C14orf135	0.763349	-0.389586	2.52926e-17
SRRM2	0.776855	-0.364283	2.56382e-17
NPFFR1	1.3441	0.426644	2.57231e-17
SLC44A4	0.243007	-2.04093	2.579e-17
C5orf58	1.76832	0.822376	2.67531e-17
PDCD6IP	0.800969	-0.320182	2.70542e-17
MEMO1	1.32978	0.411191	2.71222e-17
LSM10	1.31713	0.397396	2.73258e-17
DNAH8	1.79485	0.843865	2.92624e-17
TNFRSF6B	1.85629	0.89242	2.93821e-17
LOC284232	0.62755	-0.672198	2.99462e-17
TLE6	0.447495	-1.16006	3.01715e-17
TBC1D7	1.38476	0.469633	3.07052e-17
RILP	1.55916	0.640771	3.10621e-17
FBXO39	1.81976	0.863748	3.14824e-17
TMEM181	0.689696	-0.535968	3.23468e-17
RAB27B	0.487212	-1.03738	3.24195e-17
MVD	1.62961	0.70453	3.25099e-17
PGLYRP4	2.21354	1.14636	3.26452e-17
SUV39H2	1.45715	0.54315	3.29687e-17
RGL3	0.382854	-1.38513	3.30216e-17
KIAA1109	0.677236	-0.562269	3.34612e-17
CD1D	1.67105	0.740755	3.36017e-17
ZNF747	0.754358	-0.406679	3.50432e-17
MSX2	0.386152	-1.37276	3.55675e-17
BHLHE40	0.615354	-0.700512	3.63948e-17
TOMM5	1.34397	0.426505	3.7382e-17
KCTD6	0.582146	-0.780547	3.88255e-17
C4orf32	0.547999	-0.867755	3.95969e-17
BMS1P5	0.692252	-0.530631	3.96285e-17
SLC25A28	1.29203	0.36964	3.97415e-17
KCNH4	1.57038	0.651111	4.06314e-17
SMCR7	0.740289	-0.43384	4.10119e-17
ITGAE	1.38319	0.468	4.10776e-17
MANF	1.32464	0.405603	4.15179e-17
EPM2AIP1	0.719675	-0.474583	4.39561e-17
FSIP1	0.272606	-1.87511	4.4128e-17
SCNM1	1.3514	0.434453	4.44777e-17
BMS1P4	0.635533	-0.65396	4.53296e-17
LPPR3	0.254907	-1.97196	4.56112e-17
CCDC109B	1.42408	0.510029	4.66438e-17
CPEB3	0.697051	-0.520664	4.67317e-17
GAL3ST4	1.49453	0.579691	4.69653e-17
NLRP8	0.537673	-0.895198	4.70872e-17
ASPHD2	1.51181	0.596272	4.70872e-17
LOC100286844	0.700667	-0.5132	4.70872e-17
RASGRP3	1.48589	0.571328	4.78576e-17
UBE2T	1.70257	0.76771	4.83926e-17
C4orf36	0.629694	-0.667278	4.88136e-17
AIPL1	1.32842	0.409715	4.95259e-17
KIF18A	1.75722	0.813297	4.98091e-17
PDPK1	0.731226	-0.451611	5.0956e-17
[truncated: 10,959 more rows]

## Sheet: CESC
id	fc	log2fc	padj
TAP1	6.68147	2.74017	4.98093e-71
TAP2	4.16422	2.05805	4.23071e-47
STAT1	4.39749	2.13668	4.41322e-46
HLA-E	3.56832	1.83524	3.91889e-44
GBP1	9.564	3.25761	4.3667e-44
PSMB9	7.25681	2.85934	4.77866e-44
CXCL10	28.2283	4.81907	4.37605e-41
IRF1	4.4662	2.15905	4.76394e-41
HLA-F	7.36626	2.88093	7.71593e-41
GBP4	10.0797	3.33338	1.76298e-39
UBE2L6	3.94075	1.97847	6.36753e-39
CXCL11	31.6626	4.98471	3.24234e-38
BTN3A3	4.79219	2.26069	1.03932e-37
LOC400759	11.1823	3.48315	3.09674e-37
PSMB8	3.8693	1.95207	3.25514e-37
HLA-C	4.76854	2.25355	3.25514e-37
WARS	5.5851	2.48158	3.25514e-37
GBP5	16.7027	4.06201	3.25514e-37
LOC400696	17.2618	4.10951	1.10636e-36
ETV7	6.36334	2.66978	2.40493e-36
APOL3	6.55085	2.71168	4.01018e-36
B2M	3.63011	1.86001	1.39877e-35
HLA-B	5.87134	2.55369	1.41061e-35
IFNG	11.6762	3.5455	2.20203e-35
BTN3A1	3.72338	1.89661	7.08884e-34
IFIT3	7.00684	2.80876	3.25201e-33
EPSTI1	6.85214	2.77656	3.25201e-33
LAG3	7.73613	2.95161	1.8424e-32
APOL6	3.8501	1.94489	2.19983e-32
BATF2	7.55193	2.91685	7.93682e-32
HCP5	5.26075	2.39527	1.49927e-31
HLA-H	4.39918	2.13724	2.5852e-31
NLRC5	4.18503	2.06524	3.66629e-31
CXCR2P1	14.1901	3.82682	1.10923e-30
NKG7	8.88737	3.15176	1.72981e-30
NMI	2.35003	1.23268	2.99401e-30
CXCL9	19.2984	4.27041	3.57065e-30
IFIH1	3.15082	1.65573	4.51678e-30
TRIM22	5.2886	2.40289	7.52713e-30
GBP2	4.81754	2.2683	1.55789e-29
IDO1	18.0913	4.17723	1.72972e-29
PRF1	7.82956	2.96893	6.775e-29
TIGIT	7.16477	2.84092	8.26863e-29
HLA-A	4.17395	2.06141	9.37745e-29
TBX21	6.27228	2.64899	1.14098e-28
IL12RB1	6.36778	2.67079	1.54849e-28
CCL5	8.04394	3.0079	1.93509e-28
CCL4	5.65841	2.5004	2.07897e-28
PML	2.50371	1.32407	3.06169e-28
BTN3A2	3.74478	1.90488	3.54265e-28
SIRPG	7.56543	2.91942	4.71002e-28
ZBP1	8.30071	3.05323	6.62187e-28
GZMB	9.41004	3.2342	1.07737e-27
GZMH	9.90448	3.30808	1.76257e-27
SAMD9L	5.22045	2.38417	2.61941e-27
FBXO6	3.04889	1.60828	7.37199e-27
PARP9	2.67599	1.42007	1.07622e-26
PARP14	2.66558	1.41445	1.80135e-26
HAVCR2	4.62516	2.2095	2.20203e-26
CCR5	5.78231	2.53165	2.36197e-26
HCST	5.09747	2.34978	2.48764e-26
HLA-DRA	6.24055	2.64167	3.36856e-26
CD3G	6.54721	2.71088	4.30788e-26
CD3D	6.8758	2.78153	6.21145e-26
IL21R	5.84963	2.54835	6.4103e-26
CTLA4	5.67795	2.50537	1.41504e-25
JAKMIP1	6.92712	2.79226	1.41709e-25
KLRD1	7.29497	2.8669	1.52453e-25
GZMA	7.74054	2.95243	1.52453e-25
CD8A	7.17279	2.84253	1.62026e-25
ICOS	5.38869	2.42993	2.80945e-25
LAP3	2.66905	1.41633	2.92457e-25
TYMP	4.56026	2.18912	2.92457e-25
TRIM21	2.29025	1.1955	2.92457e-25
FASLG	6.86587	2.77944	3.24571e-25
C5orf56	3.10149	1.63296	3.67932e-25
TAPBP	2.31681	1.21214	4.33246e-25
DTX3L	2.11879	1.08324	4.51328e-25
CD2	5.84621	2.5475	4.78469e-25
CORO1A	3.5079	1.81061	7.02255e-25
HLA-DPA1	6.04806	2.59647	9.17327e-25
PDCD1	6.28051	2.65088	1.06002e-24
CD3E	5.80443	2.53715	1.06002e-24
TRIM69	3.18061	1.6693	1.06002e-24
AIM2	22.3975	4.48527	1.08969e-24
LTA	4.07329	2.02619	1.12057e-24
CXCR6	5.87946	2.55568	1.40793e-24
DOK2	4.22817	2.08003	1.44861e-24
SLA2	5.82377	2.54195	1.56036e-24
CXCR3	5.87756	2.55522	2.6891e-24
PTPN7	4.53004	2.17952	2.74651e-24
IFI44L	8.9823	3.16709	2.89206e-24
CD74	5.75773	2.5255	3.55628e-24
SASH3	4.08766	2.03127	4.8675e-24
TNFRSF9	4.85699	2.28006	4.91034e-24
CXCL13	18.2104	4.18669	5.84345e-24
CD7	5.79918	2.53585	7.06699e-24
ARHGAP9	4.24381	2.08536	7.92105e-24
CMPK2	4.54087	2.18297	8.55241e-24
SERPING1	4.96117	2.31068	1.00657e-23
HERC6	4.13644	2.04839	1.07425e-23
HLA-DRB1	7.09857	2.82753	1.09619e-23
SP110	2.65799	1.41034	1.56828e-23
RSAD2	6.67545	2.73887	1.61554e-23
PSMB10	3.18321	1.67048	2.02109e-23
PYHIN1	5.76043	2.52618	2.04366e-23
HLA-DPB1	5.20086	2.37875	2.269e-23
PSME2	2.28943	1.19499	2.27614e-23
SIT1	5.35735	2.42152	3.58742e-23
XAF1	4.45675	2.15599	3.74782e-23
APOL2	2.93631	1.55401	4.44022e-23
GPR18	4.16622	2.05874	5.79686e-23
ABI3	3.51749	1.81455	8.04764e-23
ACAP1	4.18955	2.06679	8.97312e-23
LCP2	3.66765	1.87486	9.36561e-23
IL15RA	3.20666	1.68107	1.0871e-22
FCER1G	4.13998	2.04963	1.11495e-22
ITGAL	5.29503	2.40464	1.15563e-22
PTPRCAP	4.61915	2.20763	1.3005e-22
CD96	5.23861	2.38918	1.95909e-22
PARP12	2.2278	1.15562	2.17184e-22
MYO1G	3.9434	1.97944	2.26469e-22
SP140	4.48185	2.16409	2.28605e-22
C1QC	5.46316	2.44973	3.12359e-22
CRTAM	5.9044	2.56179	3.2288e-22
C1QA	5.97471	2.57887	3.26421e-22
LILRB2	4.5798	2.19529	3.50594e-22
C1QB	6.23778	2.64103	3.78498e-22
RASAL3	4.0769	2.02747	4.01674e-22
CCL4L2	4.9402	2.30457	4.44265e-22
IFI35	3.22173	1.68784	4.56183e-22
GNGT2	3.51137	1.81203	5.32423e-22
UBASH3A	4.99777	2.32128	5.32423e-22
MIR155HG	3.2806	1.71396	5.69962e-22
CD48	4.77937	2.25682	6.80444e-22
OAS2	4.73067	2.24205	7.45361e-22
TBC1D10C	4.77468	2.2554	7.88253e-22
CST7	5.07649	2.34383	8.42722e-22
KLRC2	6.79101	2.76363	8.54071e-22
IFI30	2.82947	1.50053	8.58837e-22
PSTPIP1	4.39066	2.13444	8.64682e-22
DDX58	2.76549	1.46754	8.72168e-22
KIR2DL4	6.95474	2.798	9.68909e-22
CIITA	6.03952	2.59443	1.01008e-21
TTC24	3.78385	1.91985	1.08773e-21
TRAFD1	1.80019	0.848148	1.08773e-21
IL2RB	4.43297	2.14827	1.13738e-21
CD244	4.84191	2.27558	1.14427e-21
WAS	3.48082	1.79943	1.19656e-21
CASP1	4.20498	2.0721	1.20827e-21
UBD	10.5114	3.39389	1.36201e-21
IL2RG	4.88773	2.28916	1.56588e-21
HCG26	4.01756	2.00632	1.66858e-21
PDCD1LG2	5.07757	2.34414	1.97543e-21
ZNF683	9.39998	3.23266	2.06922e-21
GRAP2	4.19654	2.0692	2.36153e-21
SMTNL1	3.45231	1.78756	2.36153e-21
SH2D1A	5.39193	2.4308	2.4399e-21
MX1	4.86748	2.28318	2.82083e-21
CD53	3.84087	1.94143	3.60091e-21
GNLY	8.21034	3.03744	3.63657e-21
NCF1	4.21928	2.077	3.81541e-21
SLAMF8	4.05248	2.01881	4.08999e-21
GIMAP5	3.77383	1.91603	5.47947e-21
IL18BP	2.50516	1.32491	5.68565e-21
KLRK1	5.69472	2.50962	6.71243e-21
TMEM140	2.19805	1.13623	8.0809e-21
RNF213	2.36241	1.24026	8.50781e-21
BAK1	1.97552	0.982231	8.67453e-21
2022-09-01	3.44339	1.78383	9.80381e-21
NCKAP1L	4.14375	2.05094	9.81797e-21
CYTH4	3.44819	1.78584	1.02471e-20
SPI1	3.56818	1.83519	1.02674e-20
DDX60	3.89306	1.9609	1.1404e-20
MYO1F	3.35981	1.74838	1.27212e-20
HLA-DRB6	7.50353	2.90757	1.32e-20
TNFAIP8L2	3.64848	1.8673	1.36848e-20
STAT2	2.09409	1.06632	1.38276e-20
FCGR1A	5.59189	2.48334	1.52826e-20
IFI44	5.07115	2.34231	1.83459e-20
HLA-DMA	4.62368	2.20904	2.15492e-20
CD86	3.80512	1.92794	2.24578e-20
ITGB2	3.78066	1.91864	2.54729e-20
FERMT3	3.22444	1.68905	3.49785e-20
LAPTM5	3.43358	1.77972	3.97637e-20
SAMD3	4.32064	2.11125	4.0584e-20
LILRB1	4.39628	2.13628	5.14048e-20
APOB48R	2.88442	1.52828	5.31957e-20
PSME1	1.8124	0.857901	5.44766e-20
KIR3DL2	4.66802	2.22281	5.8494e-20
HLA-G	5.04896	2.33599	6.43262e-20
IFIT2	4.07397	2.02644	6.76491e-20
HLA-DRB5	7.13289	2.83449	8.0922e-20
FUT7	4.2191	2.07694	8.66967e-20
GPR65	3.48506	1.80118	8.69161e-20
FCGR1C	4.70741	2.23493	9.12535e-20
OAS3	2.81121	1.49119	9.22433e-20
SPN	3.80431	1.92763	1.0359e-19
AIF1	3.7125	1.89239	1.07053e-19
DOCK2	3.98915	1.99608	1.18716e-19
SCO2	2.50048	1.3222	1.19695e-19
ICAM1	3.26342	1.70639	1.26119e-19
C3AR1	3.82978	1.93726	1.31758e-19
SAMSN1	3.57455	1.83776	1.43603e-19
TRAF3IP3	3.85207	1.94564	1.44664e-19
FCGR3A	5.21692	2.3832	1.49997e-19
CD80	3.92038	1.97099	1.49997e-19
LRRC25	3.27795	1.71279	1.85566e-19
TARP	4.98492	2.31757	2.21231e-19
C1orf200	2.03108	1.02225	2.21231e-19
TNFSF13B	4.3976	2.13672	2.23242e-19
CCL3	4.18208	2.06422	2.30615e-19
CARD16	3.44544	1.78469	2.68329e-19
FCGR1B	4.76665	2.25297	2.7678e-19
FCGR2A	3.16754	1.66336	2.78758e-19
CD247	4.17999	2.0635	2.80431e-19
TYROBP	3.86293	1.94969	2.93519e-19
CCR1	3.43592	1.7807	2.95343e-19
SLA	3.62421	1.85767	3.41421e-19
ITGB7	3.1228	1.64284	3.60612e-19
CD38	5.78472	2.53225	3.96567e-19
LAT2	2.67728	1.42077	4.06483e-19
TRAT1	4.88215	2.28752	4.25063e-19
SIGLEC10	3.91423	1.96873	5.35672e-19
IL2RA	4.59377	2.19968	5.93708e-19
BATF	4.44054	2.15074	6.1036e-19
CD4	3.65121	1.86837	6.51167e-19
GIMAP4	3.32417	1.73299	6.53861e-19
RTP4	4.86076	2.28118	7.18492e-19
MS4A6A	3.83023	1.93743	7.59395e-19
KLRC3	5.17112	2.37048	7.80919e-19
MNDA	4.05027	2.01802	8.05245e-19
GIMAP1	3.23524	1.69387	8.33327e-19
HLA-L	2.99742	1.58372	8.48338e-19
SIGLEC1	5.40099	2.43322	8.6844e-19
GZMM	5.06489	2.34053	8.89434e-19
LCP1	3.28056	1.71394	9.32738e-19
APOBEC3G	3.36384	1.75011	9.37598e-19
RAB33A	2.68241	1.42353	9.37598e-19
C1orf162	3.17687	1.66761	9.37598e-19
C19orf66	2.08005	1.05662	1.46274e-18
HAPLN3	2.88422	1.52818	1.48483e-18
FAM26F	4.35112	2.12139	1.75547e-18
HK3	4.66502	2.22188	2.11526e-18
IKZF1	3.68835	1.88298	2.51173e-18
SEPX1	2.2674	1.18104	2.62957e-18
CD274	6.18364	2.62846	2.64571e-18
CTSW	6.51974	2.70481	2.64571e-18
CYBB	3.93562	1.97659	2.81043e-18
BST2	3.38215	1.75794	2.95759e-18
SLAMF1	3.94239	1.97907	3.00235e-18
DDX60L	2.8786	1.52537	3.01425e-18
EVI2B	3.58943	1.84375	3.01698e-18
KLHDC7B	12.2643	3.61639	3.41021e-18
IRF9	2.09704	1.06835	3.74155e-18
FMNL1	2.66003	1.41144	3.85538e-18
SLAMF6	4.61638	2.20676	4.09071e-18
MOV10	1.64343	0.716713	4.8699e-18
MMP25	3.05664	1.61195	5.62056e-18
HLA-DOB	4.44317	2.15159	6.51395e-18
CD37	3.47076	1.79525	7.18032e-18
LAIR1	3.83725	1.94007	7.22824e-18
FAM78A	2.80432	1.48765	8.10306e-18
IL18RAP	3.93724	1.97719	8.5433e-18
TRANK1	2.5049	1.32475	9.63873e-18
IL32	4.09858	2.03512	1.00787e-17
OGFR	1.73448	0.7945	1.11012e-17
SNX20	3.55331	1.82916	1.13679e-17
CD27	4.86909	2.28365	1.18203e-17
CD52	3.79961	1.92585	1.20381e-17
GPR171	4.82238	2.26974	1.23127e-17
IL15	3.91383	1.96858	1.33545e-17
PARP10	2.13758	1.09598	1.36016e-17
CCL8	6.45578	2.69059	1.37682e-17
EVI2A	3.36679	1.75137	1.44152e-17
IFIT5	2.34785	1.23134	1.72169e-17
TFEC	4.02672	2.0096	2.03657e-17
SIGLEC7	3.33979	1.73976	2.06735e-17
KIAA0748	3.7537	1.90831	2.06911e-17
IFI6	4.9455	2.30612	2.23489e-17
LST1	3.58216	1.84083	2.26778e-17
LOC606724	3.13048	1.64638	2.38594e-17
CYTIP	3.56627	1.83442	2.389e-17
UBA7	3.02424	1.59657	2.47585e-17
CD300A	2.62129	1.39028	2.48766e-17
FLT3LG	2.61022	1.38417	2.53768e-17
ALOX5AP	3.20197	1.67896	2.54911e-17
LCK	3.30476	1.72455	2.5944e-17
NLRC3	2.76612	1.46786	2.6733e-17
ARHGAP15	3.9274	1.97357	2.71816e-17
LPXN	2.37839	1.24999	2.79391e-17
APBB1IP	3.79539	1.92425	2.83451e-17
APOBEC3H	3.09152	1.62832	2.94599e-17
FGL2	4.19952	2.07022	2.94599e-17
CSF1R	3.50605	1.80985	3.0689e-17
SP100	1.93925	0.955498	3.11444e-17
NCR3	3.82442	1.93524	3.21849e-17
LOC100233209	3.70192	1.88827	3.22358e-17
ISG15	4.25824	2.09026	3.27306e-17
HLA-DQB1	5.50446	2.4606	3.3481e-17
SCML4	4.5458	2.18453	3.62447e-17
RNASE2	3.2638	1.70655	3.75551e-17
CD14	3.01951	1.59431	3.76082e-17
ARHGAP25	2.67321	1.41857	3.89696e-17
TIFAB	4.33112	2.11474	4.03573e-17
CD33	3.23316	1.69295	4.16807e-17
SLAMF7	4.88962	2.28972	4.80369e-17
PATL2	3.41104	1.77021	4.95876e-17
RARRES3	4.55573	2.18768	5.12402e-17
XCL2	4.36256	2.12517	5.75219e-17
HLA-DQA1	6.39997	2.67807	6.08185e-17
CLECL1	3.24397	1.69776	6.29165e-17
SECTM1	3.96585	1.98763	6.30748e-17
IL16	2.8468	1.50934	6.52402e-17
IL10RA	3.35166	1.74488	7.17472e-17
MAP4K1	3.46285	1.79196	7.94713e-17
GMFG	3.0262	1.59751	8.19176e-17
OPTN	1.95873	0.969919	8.35666e-17
GPR174	3.76424	1.91236	8.89022e-17
PTPRC	4.13831	2.04904	9.14905e-17
EBI3	3.72575	1.89753	9.87649e-17
CD300LF	3.30602	1.72509	1.03026e-16
FPR3	3.62274	1.85708	1.07027e-16
KLRC1	5.20073	2.37872	1.13632e-16
PIK3CD	2.51013	1.32776	1.15368e-16
USP18	2.51466	1.33037	1.1984e-16
CMKLR1	3.66694	1.87458	1.31645e-16
IGSF6	3.41631	1.77244	1.37405e-16
GPR25	3.47005	1.79496	1.49531e-16
IFITM1	3.85064	1.9451	1.56049e-16
SRGN	3.17385	1.66623	1.60403e-16
STX11	3.48017	1.79916	1.6772e-16
IL27	2.57336	1.36365	1.67729e-16
SLC15A3	2.84321	1.50752	1.72803e-16
CD5	4.00146	2.00053	1.9236e-16
MPEG1	3.24015	1.69606	2.0231e-16
SIGLEC9	3.14431	1.65274	2.11458e-16
TLR8	4.61667	2.20685	2.34782e-16
ARHGAP30	2.70654	1.43645	2.60966e-16
NCRNA00158	2.14214	1.09905	3.13568e-16
CD226	2.97931	1.57498	3.80325e-16
ACP5	2.99644	1.58325	4.07607e-16
GIMAP7	3.32892	1.73506	4.13955e-16
GIMAP6	2.75707	1.46314	4.95202e-16
LOC100188949	3.23151	1.69221	5.24821e-16
RNASE6	3.01476	1.59204	5.264e-16
ZNF831	4.09693	2.03454	5.40804e-16
GAB3	2.71004	1.43832	6.3366e-16
LILRA6	3.52223	1.81649	6.3366e-16
BTK	3.35621	1.74683	6.33924e-16
C1R	3.0894	1.62733	6.38255e-16
HLA-DOA	5.10161	2.35095	6.56996e-16
CLEC4A	2.83922	1.50549	6.90419e-16
RGL4	2.87912	1.52563	7.39583e-16
SELPLG	2.88288	1.52751	7.60215e-16
CD300C	2.94501	1.55827	8.06781e-16
FOXP3	3.16909	1.66407	8.8487e-16
CASP5	3.4576	1.78977	1.01224e-15
IFITM3	2.82418	1.49783	1.15541e-15
JAK3	2.69866	1.43225	1.16946e-15
GPR84	2.90741	1.53974	1.24252e-15
RHOG	1.60701	0.684379	1.24339e-15
CD6	3.28984	1.71802	1.24734e-15
BTLA	3.26362	1.70647	1.32219e-15
TRPV2	2.80753	1.4893	1.39722e-15
AOAH	5.01132	2.32519	1.44461e-15
P2RY10	3.67879	1.87923	1.61606e-15
RAC2	2.91024	1.54114	1.71779e-15
TAGAP	3.34959	1.74399	1.87102e-15
FYB	3.84426	1.94271	1.87798e-15
GZMK	6.18535	2.62885	2.11077e-15
CD72	3.4026	1.76664	2.12756e-15
ZAP70	4.36117	2.12472	2.13918e-15
TNFRSF1B	2.71361	1.44021	2.16385e-15
IFIT1	4.8396	2.27489	2.16422e-15
PLEK	3.28388	1.7154	2.56296e-15
APOL1	4.68014	2.22655	2.73832e-15
GVIN1	3.58719	1.84285	2.74515e-15
HLA-DQA2	5.61808	2.49008	2.80399e-15
LILRB4	4.76512	2.25251	2.85748e-15
KIR2DL3	3.2698	1.7092	2.95507e-15
FCGR2B	3.37573	1.7552	3.82192e-15
C15orf53	1.84747	0.885549	3.94961e-15
IRF7	2.69501	1.43029	4.21971e-15
RUFY4	4.93611	2.30337	4.30349e-15
MICB	3.43974	1.7823	4.59089e-15
LILRP2	3.41177	1.77052	6.49888e-15
NCF1B	3.33117	1.73603	6.8683e-15
OAS1	3.08589	1.62569	7.00527e-15
C2	4.65495	2.21877	9.48248e-15
ITK	3.97314	1.99028	9.48248e-15
CASP4	2.15137	1.10526	9.94585e-15
FCGR2C	3.13059	1.64644	1.10084e-14
PIK3R5	2.78511	1.47773	1.21209e-14
CLEC12A	4.57629	2.19418	1.23627e-14
OASL	4.54004	2.1827	1.35128e-14
RHOH	3.12777	1.64513	1.41794e-14
PTPN22	4.05789	2.02073	1.42107e-14
ADORA3	3.10511	1.63465	1.51303e-14
NCF1C	3.58519	1.84205	1.58193e-14
STAT4	3.02536	1.59711	1.59185e-14
CD163	4.12044	2.0428	1.89858e-14
VAMP5	2.7426	1.45555	2.11463e-14
PIK3R6	2.75581	1.46248	2.13467e-14
AMICA1	3.7667	1.9133	2.19197e-14
THEMIS	3.88784	1.95897	2.27222e-14
IL9R	3.08022	1.62303	2.32213e-14
LAIR2	3.60253	1.84901	2.86188e-14
RGS18	2.91307	1.54254	3.01791e-14
RCSD1	2.90282	1.53745	3.46768e-14
TMEM156	3.07983	1.62285	4.68824e-14
ZBTB32	2.82302	1.49724	4.68824e-14
MS4A4A	3.61883	1.85552	4.68824e-14
PARVG	3.08559	1.62555	4.86902e-14
SLFN12L	2.8368	1.50426	6.02456e-14
CD84	3.59681	1.84672	6.06884e-14
NUB1	1.54982	0.632096	6.13794e-14
TMIGD2	4.17915	2.06321	6.34926e-14
PSMA5	1.49508	0.580227	7.04801e-14
MLKL	2.20953	1.14374	7.04801e-14
ADA	2.89947	1.53579	7.62891e-14
LY6E	2.49083	1.31663	7.67457e-14
GBP3	2.65987	1.41136	8.56797e-14
AGAP2	2.62716	1.3935	8.70159e-14
C5orf20	3.89571	1.96189	9.37625e-14
OSCAR	2.58	1.36737	1.13179e-13
LILRB3	3.18848	1.67287	1.16745e-13
C17orf87	3.06705	1.61685	1.3004e-13
PIK3CG	2.98889	1.57961	1.44605e-13
LTB	3.46672	1.79357	1.64794e-13
BCL2A1	2.94449	1.55802	1.66688e-13
CXorf21	2.80709	1.48907	1.72359e-13
ITM2A	3.19221	1.67456	1.73903e-13
MYO7A	2.64269	1.402	1.75285e-13
MS4A7	3.11151	1.63761	1.94847e-13
PLEKHO2	1.68341	0.751385	2.32087e-13
GBP7	2.13738	1.09584	2.35671e-13
ARHGDIB	2.3325	1.22188	2.37147e-13
FCRL6	3.62973	1.85986	2.38494e-13
GIMAP8	2.40614	1.26672	2.7063e-13
SLCO2B1	3.25335	1.70193	2.7063e-13
CCL13	4.18222	2.06427	2.76841e-13
ZNFX1	1.62933	0.704279	3.01711e-13
CD40	3.39021	1.76137	3.06602e-13
HLA-DQB2	5.09114	2.34799	3.53245e-13
ODF3B	2.51283	1.32931	3.56389e-13
HSPA7	2.79185	1.48122	3.72378e-13
CD209	3.47132	1.79548	3.81667e-13
ATP8B4	2.31022	1.20803	3.99913e-13
KIAA1949	2.05469	1.03892	4.04061e-13
WIPF1	2.56503	1.35898	4.91872e-13
SH2D2A	2.70567	1.43599	5.64837e-13
P2RY13	3.40912	1.7694	5.82574e-13
LILRA5	2.77644	1.47324	6.02799e-13
ZNF80	3.05877	1.61295	6.10257e-13
LAT	2.38797	1.25579	6.20086e-13
TMEM149	2.10446	1.07345	7.0905e-13
GIMAP2	2.60404	1.38075	7.31421e-13
SIGLEC5	2.86392	1.51799	7.55096e-13
FGD3	2.19426	1.13373	7.82391e-13
JAK2	2.43824	1.28584	7.9161e-13
IFI27	3.62673	1.85867	7.94625e-13
GPSM3	2.29624	1.19928	7.94713e-13
NECAP2	1.38582	0.470744	8.23102e-13
GFI1	2.74152	1.45498	9.69631e-13
TLR7	3.14118	1.65131	1.06435e-12
GJD3	2.569	1.36121	1.142e-12
GPR34	2.52257	1.33489	1.2044e-12
MEFV	3.11383	1.63869	1.23059e-12
MPP1	2.63301	1.39671	1.29294e-12
ITGAX	2.57749	1.36597	1.36901e-12
CLEC2B	4.89063	2.29002	1.40363e-12
ADAMDEC1	5.95592	2.57432	1.66854e-12
PHF11	1.66456	0.735143	1.7224e-12
FGD2	2.67561	1.41987	1.74701e-12
CLEC4E	3.94247	1.9791	1.80762e-12
PSMB2	1.42285	0.508779	1.9373e-12
CD200R1	3.2672	1.70805	1.94477e-12
ADAP2	2.25692	1.17436	2.26182e-12
CLEC7A	4.1094	2.03893	2.28611e-12
TRAF1	2.00157	1.00113	2.61655e-12
WDFY4	3.28563	1.71617	2.61655e-12
ADAR	1.46684	0.552709	2.61655e-12
LY9	3.92667	1.97331	2.97844e-12
HMHA1	1.92291	0.94329	2.99464e-12
LY86	3.01014	1.58983	2.99496e-12
TNFRSF4	2.64266	1.40199	3.029e-12
NLRC4	1.96574	0.975075	3.06091e-12
HLA-DMB	3.50499	1.80941	3.29657e-12
SORL1	0.324938	-1.62176	3.86636e-12
GPR82	2.40103	1.26365	3.90676e-12
PRKCB	3.18011	1.66907	3.9354e-12
TNFRSF8	2.89488	1.5335	4.03692e-12
CCL3L1	3.23025	1.69165	4.03937e-12
CCDC109B	2.13694	1.09555	4.49439e-12
TNIP3	4.10762	2.0383	4.87791e-12
STAB1	2.35153	1.2336	4.98405e-12
EMR2	2.77807	1.47409	5.9526e-12
DOCK8	2.47177	1.30554	6.02594e-12
ISG20	2.59025	1.37309	6.90098e-12
HERC5	2.95697	1.56412	7.70328e-12
BTN2A2	2.02362	1.01694	7.71262e-12
SLC25A28	1.72897	0.789915	1.04071e-11
SIGLEC8	3.81761	1.93267	1.12521e-11
SLC7A7	2.61223	1.38528	1.12525e-11
IL29	2.1758	1.12154	1.29192e-11
CEACAM4	2.70844	1.43746	1.42185e-11
C1S	3.05387	1.61064	1.44058e-11
TRIM2	0.295867	-1.75698	1.45428e-11
SLC2A5	3.07634	1.62121	1.46175e-11
ICAM3	1.97043	0.978512	1.50949e-11
CD69	3.18118	1.66956	1.65265e-11
S1PR4	2.58915	1.37248	1.67435e-11
FAM164C	0.492355	-1.02223	1.67435e-11
EOMES	3.7215	1.89588	1.72114e-11
ARHGEF6	2.32283	1.21589	1.77652e-11
CCDC42	1.60676	0.684151	1.89722e-11
LSP1	3.07518	1.62067	2.07505e-11
P2RY6	3.29886	1.72197	2.17543e-11
CD180	2.58842	1.37207	2.19632e-11
CCR2	3.34234	1.74086	2.22514e-11
PILRA	2.60456	1.38104	2.5082e-11
ZNF664	0.616404	-0.698052	2.5082e-11
CARD17	2.72863	1.44817	2.57871e-11
DOK3	2.03783	1.02703	2.57871e-11
CCDC141	2.25548	1.17344	2.63725e-11
BIN2	2.84714	1.50951	2.96301e-11
FREM2	0.0872247	-3.51912	3.01666e-11
CLNK	2.04677	1.03335	3.35989e-11
CTRL	2.15982	1.11091	3.35989e-11
CLIC2	3.27066	1.70958	3.37946e-11
PRIC285	1.95476	0.966994	3.44461e-11
NEXN	3.26471	1.70696	3.58077e-11
VSIG4	3.75744	1.90975	3.59146e-11
IFFO1	2.18304	1.12634	3.61206e-11
OTOF	3.14671	1.65384	3.64325e-11
PRKD2	1.44485	0.530917	3.70791e-11
C9orf139	2.43685	1.28502	3.84636e-11
NLRP3	2.29797	1.20036	4.12639e-11
STK10	1.65808	0.729515	4.18509e-11
C19orf35	2.10334	1.07269	4.55431e-11
FLI1	2.30626	1.20556	5.23934e-11
AIPL1	2.39526	1.26018	5.23934e-11
RLTPR	2.98381	1.57715	5.23934e-11
PARP15	2.82725	1.4994	5.45206e-11
LAMP3	3.33277	1.73672	5.78272e-11
TRIM26	1.41416	0.499946	5.93891e-11
MOAP1	0.609361	-0.714632	6.09291e-11
C17orf66	1.90021	0.926159	6.29406e-11
MX2	3.21166	1.68332	6.40166e-11
MS4A14	2.55949	1.35586	6.40975e-11
STAT5A	2.04789	1.03414	6.7037e-11
MATK	3.39946	1.76531	6.74082e-11
INPP5D	2.35444	1.23538	7.28673e-11
C10orf54	2.10031	1.0706	9.44684e-11
FCRL3	3.5286	1.8191	9.61167e-11
TMC8	2.22374	1.15299	1.0123e-10
SAMHD1	2.28991	1.19529	1.01842e-10
MSR1	3.03313	1.60081	1.09139e-10
ABCD2	2.79902	1.48492	1.32264e-10
TREM2	3.58419	1.84165	1.44176e-10
SUSD3	2.74256	1.45552	1.47618e-10
SPOCK2	2.75153	1.46023	1.51172e-10
ADPRHL2	1.36461	0.448485	1.58114e-10
C7orf41	0.472159	-1.08265	1.63842e-10
C17orf60	2.54716	1.34889	1.6409e-10
CMTM4	0.537266	-0.896291	1.74856e-10
RASSF4	2.33025	1.22049	1.77908e-10
CKB	0.379587	-1.3975	2.06035e-10
EEPD1	0.478945	-1.06207	2.06484e-10
PLA2G7	3.02128	1.59516	2.09567e-10
LY96	2.55884	1.35549	2.14084e-10
C1orf54	2.22618	1.15457	2.21454e-10
DHX58	1.97955	0.985169	2.29951e-10
CXCR5	3.04283	1.60541	2.38404e-10
KIR3DL1	2.47898	1.30974	2.47451e-10
2022-03-01	2.0685	1.04859	2.49229e-10
MAPK8IP1	0.331348	-1.59358	2.55768e-10
MFNG	2.1622	1.1125	2.61676e-10
KIR2DS4	2.88239	1.52727	2.72219e-10
C11orf21	2.89343	1.53278	2.80123e-10
CLEC10A	4.05797	2.02076	2.88646e-10
PTPN6	1.51139	0.595875	2.88646e-10
TMEM150B	2.98416	1.57732	2.90684e-10
CSF2RB	2.6117	1.38499	3.11978e-10
TRIM14	1.65016	0.722609	3.14122e-10
IRF8	2.84658	1.50923	3.20357e-10
APOBEC3D	2.48084	1.31083	3.48303e-10
FLT3	2.89977	1.53594	3.72932e-10
CLCN2	0.555838	-0.847264	3.76586e-10
CECR1	2.97498	1.57288	3.76976e-10
NFKBIE	1.68899	0.756161	3.77001e-10
KLHL6	2.58973	1.3728	3.97395e-10
DEF6	1.76777	0.821931	4.09526e-10
KCNAB2	2.08913	1.0629	4.56875e-10
C8orf80	3.06834	1.61746	4.60939e-10
EPCAM	0.303508	-1.72019	4.69872e-10
IFI16	2.90728	1.53967	4.71767e-10
VPS37D	0.304457	-1.71569	4.82299e-10
USP54	0.530842	-0.913645	5.09106e-10
PLCB2	2.13852	1.09661	5.28916e-10
TTC26	0.576333	-0.795025	5.29615e-10
CSF1	2.26307	1.17828	5.48763e-10
STAP1	2.6456	1.4036	5.8155e-10
DENND1C	1.78187	0.833388	5.93225e-10
KLRC4	2.9455	1.55851	6.22521e-10
CD101	1.96882	0.97733	6.58128e-10
TAPBPL	1.9876	0.991027	6.87814e-10
SLC31A2	2.10426	1.07331	7.00449e-10
STX4	1.41608	0.5019	7.094e-10
PLA2G2D	5.97733	2.5795	7.44225e-10
STAC3	2.07496	1.05309	7.49702e-10
APOE	3.7461	1.90539	7.94823e-10
IL12B	2.43593	1.28447	8.0448e-10
RCOR2	0.277949	-1.84711	8.17422e-10
LILRB5	2.92691	1.54938	8.17422e-10
IL12RB2	5.12528	2.35763	8.75385e-10
TNFSF12-TNFSF13	5.33194	2.41466	8.89556e-10
CTSS	2.45161	1.29373	9.13761e-10
XRN1	1.61194	0.688801	9.13761e-10
ATP2C2	0.276486	-1.85472	9.2735e-10
CELF2	2.49894	1.32132	9.7942e-10
GPR125	0.426852	-1.22819	9.99161e-10
ST8SIA4	2.25235	1.17143	1.04557e-09
TRIM34	1.83941	0.879239	1.05849e-09
CD28	2.52507	1.33632	1.09313e-09
APOC1	3.43812	1.78162	1.09615e-09
CCND3	1.53955	0.622508	1.14672e-09
CFH	3.29456	1.72009	1.17616e-09
PTCRA	2.24491	1.16665	1.17616e-09
SAMD9	2.97721	1.57396	1.17698e-09
CLEC12B	1.97965	0.985247	1.18575e-09
MMP9	3.4287	1.77766	1.19033e-09
GSDMD	1.64729	0.720094	1.19127e-09
FGR	2.15804	1.10972	1.25548e-09
GRN	1.5728	0.653338	1.26257e-09
NCR1	2.21227	1.14552	1.26523e-09
C16orf54	2.81259	1.4919	1.27241e-09
PSTPIP2	2.17745	1.12264	1.31123e-09
EPS8	0.383468	-1.38282	1.63283e-09
OR52N4	1.64148	0.714993	1.66629e-09
IL4I1	2.35607	1.23639	1.81388e-09
PLS1	0.379238	-1.39882	1.81412e-09
ZNF704	0.322923	-1.63074	1.85832e-09
RIMKLA	0.192617	-2.37619	1.89763e-09
PPM1H	0.246162	-2.02232	1.89763e-09
PARP3	1.75389	0.810561	1.97798e-09
IRF4	3.25501	1.70266	2.03715e-09
NFAM1	2.32773	1.21892	2.13511e-09
HAMP	3.06111	1.61406	2.258e-09
APOC2	3.81167	1.93042	2.43503e-09
STARD5	2.69922	1.43254	2.45315e-09
CHST11	2.6421	1.40169	2.93314e-09
N4BP2L1	2.09353	1.06594	3.12371e-09
CPD	0.540316	-0.888126	3.19396e-09
RBCK1	1.45397	0.539995	3.21825e-09
RNASE3	1.66314	0.733912	3.2314e-09
GPBAR1	2.01408	1.01012	3.66313e-09
CLEC9A	2.47977	1.31021	3.66864e-09
RASGRP1	2.65732	1.40997	3.72544e-09
ERAP1	1.75414	0.810765	3.77527e-09
TNFSF10	2.87781	1.52497	3.91607e-09
C1orf38	2.00775	1.00558	4.31093e-09
HES6	0.373808	-1.41963	4.48671e-09
FAM113B	2.07814	1.05529	4.55533e-09
TOX3	0.10896	-3.19813	4.63196e-09
KIR3DL3	1.78909	0.839223	4.89741e-09
SNX10	2.35789	1.2375	4.91129e-09
USF1	1.42939	0.5154	4.97419e-09
S100B	3.37835	1.75632	5.04963e-09
CCRL2	2.32224	1.21552	5.07799e-09
APOL4	2.78956	1.48004	5.25062e-09
KLHDC8A	0.274634	-1.86442	5.31872e-09
DPYD	2.55356	1.35251	5.35229e-09
LYPD5	2.75613	1.46264	6.08127e-09
C16orf7	1.73697	0.796576	6.12835e-09
P2RY8	2.61025	1.38419	6.21431e-09
KIAA1147	0.543792	-0.878873	6.2757e-09
LAX1	3.06128	1.61413	6.2896e-09
LRP6	0.590082	-0.761014	6.50623e-09
TDRD7	1.50094	0.585869	6.5367e-09
C19orf28	1.6497	0.722208	6.75969e-09
SLC12A2	0.459536	-1.12175	6.85764e-09
SHISA5	1.59278	0.671549	7.25773e-09
GM2A	2.0098	1.00705	7.48713e-09
PVRIG	1.93037	0.948879	7.56034e-09
CFB	3.8836	1.9574	8.27477e-09
LOC100129066	1.90924	0.933001	8.65435e-09
TLR2	2.02594	1.01859	8.65435e-09
PREPL	0.676062	-0.564772	8.65435e-09
FAM161A	0.552627	-0.855623	8.95653e-09
HCK	2.5184	1.33251	9.11415e-09
SOCS1	2.08246	1.05829	9.72098e-09
RNF19B	1.69832	0.764106	9.77633e-09
CD68	2.03872	1.02767	9.86072e-09
PTK2B	1.79098	0.840749	1.05283e-08
ACP2	1.41871	0.504579	1.06028e-08
PPP1R16B	2.36777	1.24353	1.07531e-08
KCNJ10	2.87149	1.5218	1.08154e-08
RHBDF2	1.67304	0.742468	1.08254e-08
MMP12	4.55833	2.1885	1.08799e-08
CCDC108	0.3504	-1.51292	1.09426e-08
CYLD	1.48687	0.572279	1.13999e-08
INPP1	2.29107	1.19602	1.19509e-08
ITGAE	1.59413	0.672774	1.19833e-08
CHI3L2	4.39444	2.13568	1.282e-08
FAM172A	0.668396	-0.581226	1.3402e-08
TRAF2	1.4641	0.550011	1.3506e-08
ANXA8	8.23312	3.04144	1.3563e-08
PIK3AP1	2.30343	1.20378	1.4341e-08
LILRA3	3.02606	1.59744	1.46034e-08
EXOC3L	1.75488	0.811373	1.49366e-08
DHX40	0.677714	-0.561253	1.53842e-08
ATP7B	0.265742	-1.9119	1.63337e-08
ARPC5L	1.40505	0.490619	1.67604e-08
FAS	2.0818	1.05783	1.68676e-08
SP140L	1.79644	0.845141	1.72009e-08
PRAM1	2.27553	1.1862	1.75741e-08
GPR183	2.37627	1.2487	1.76031e-08
ITGAM	2.29757	1.20011	1.77863e-08
CEACAM21	2.48223	1.31164	1.78649e-08
CUEDC1	0.490077	-1.02892	1.84364e-08
CLEC5A	2.27412	1.18531	1.84502e-08
SPRED2	0.557294	-0.84349	2.02429e-08
SOD2	1.90274	0.928078	2.04576e-08
CR1L	2.6129	1.38565	2.04655e-08
CSAG3	6.64926	2.73319	2.09213e-08
CD79B	2.76878	1.46925	2.15401e-08
APOBEC3A	4.39388	2.13549	2.29153e-08
RGS1	2.85429	1.51313	2.38954e-08
CTSD	1.64115	0.714705	2.4311e-08
TRIM5	1.6316	0.706287	2.56355e-08
RASGRP3	1.97825	0.984222	2.58863e-08
SOSTDC1	0.15737	-2.66777	2.59556e-08
SIGLEC12	3.19129	1.67414	2.6166e-08
LPAR6	2.73204	1.44998	2.6166e-08
MAP4K3	0.683449	-0.549094	2.65353e-08
BCL2L14	3.09931	1.63195	2.89518e-08
LOC400027	0.621325	-0.686579	3.05472e-08
ARHGEF38	0.29755	-1.74879	3.05472e-08
RRN3P2	2.02954	1.02115	3.19678e-08
HTRA4	2.53759	1.34346	3.32441e-08
KIAA1549	0.266129	-1.9098	3.33109e-08
LYL1	1.92308	0.943418	3.33159e-08
SIRPB2	2.34284	1.22826	3.4825e-08
TCL1A	3.09143	1.62827	3.55608e-08
ZNF70	0.651803	-0.617493	3.60036e-08
SLC9A4	0.29107	-1.78056	3.76419e-08
C12orf59	3.01258	1.591	3.76419e-08
TTC3	0.697005	-0.520758	3.803e-08
DENND2D	1.48654	0.571958	3.803e-08
KIAA1737	0.643629	-0.635698	3.82888e-08
SH2D3C	1.78269	0.834052	4.06863e-08
RFTN1	2.00973	1.007	4.06863e-08
USP15	1.34454	0.42711	4.08006e-08
SOBP	0.33596	-1.57364	4.20706e-08
TBXAS1	2.32574	1.21769	4.26578e-08
ERAP2	3.08063	1.62323	4.35071e-08
CAPG	1.7033	0.768335	4.38394e-08
SBNO2	1.5063	0.591008	4.43173e-08
C11orf17	1.52847	0.61209	4.45313e-08
FLVCR2	2.28623	1.19297	4.631e-08
CERK	0.636873	-0.650923	4.77055e-08
TNFRSF14	1.83895	0.87888	4.82093e-08
RAP1GAP	0.300586	-1.73415	5.03044e-08
CASP10	2.1791	1.12373	5.12589e-08
SCUBE1	2.5844	1.36983	5.2616e-08
GRIP2	2.25421	1.17262	5.38165e-08
ANKRD58	1.93816	0.954686	5.44496e-08
PLSCR1	1.78545	0.836292	5.67913e-08
GNG2	2.00016	1.00011	5.69799e-08
MSN	2.14334	1.09986	5.81816e-08
RENBP	2.37867	1.25015	5.88872e-08
LILRA1	1.87039	0.90334	5.98567e-08
SLC9A2	0.215529	-2.21404	5.99262e-08
SLC35F5	0.627425	-0.672486	6.29119e-08
AK7	0.348913	-1.51906	6.4087e-08
CCM2	1.52313	0.607037	6.4087e-08
PLA2G4C	2.44496	1.28981	6.85348e-08
CD8B	3.43535	1.78046	6.98543e-08
ARID5A	1.57522	0.655549	7.11118e-08
RELB	1.6089	0.686079	7.11562e-08
IYD	0.268354	-1.89779	7.18959e-08
NEK5	0.442506	-1.17623	7.22036e-08
DNAL1	0.673907	-0.569379	7.29247e-08
CXorf65	1.98555	0.989536	7.29247e-08
PLEKHF1	2.20094	1.13812	7.36802e-08
KIR2DL1	2.22315	1.1526	7.46012e-08
MCOLN2	2.37707	1.24918	7.46033e-08
C1orf194	0.234699	-2.09112	7.52785e-08
CCR8	2.15599	1.10835	7.5625e-08
AKNA	1.68843	0.755679	7.89255e-08
RASGRP4	1.80602	0.852816	7.89255e-08
FAM13A	0.514459	-0.958871	8.04568e-08
CCL3L3	2.05037	1.03589	8.05157e-08
GRIN3A	1.95106	0.96426	8.14706e-08
DDAH1	0.336471	-1.57145	8.45965e-08
EMR1	2.85573	1.51386	8.89475e-08
HLA-DPB2	2.48601	1.31383	8.94618e-08
LOC285419	0.429806	-1.21824	9.14351e-08
HVCN1	1.86126	0.89628	9.20571e-08
LYSMD2	1.60745	0.684771	9.2336e-08
MAP1A	0.446117	-1.1645	9.34114e-08
LMBR1	0.681399	-0.553428	9.54636e-08
EMP3	1.88996	0.918353	1.00106e-07
ELMO1	2.09183	1.06477	1.0012e-07
PEG10	0.134625	-2.89298	1.0012e-07
EPB41L4B	0.408161	-1.29279	1.0012e-07
KIF3A	0.674291	-0.568556	1.02567e-07
C1orf130	0.226875	-2.14003	1.0604e-07
KCNA3	2.52191	1.33452	1.0631e-07
CASS4	2.21861	1.14965	1.07822e-07
DRD2	0.27907	-1.8413	1.10964e-07
TMEM91	2.12337	1.08636	1.12446e-07
MTMR12	0.62786	-0.671486	1.12489e-07
TSPAN32	2.50886	1.32703	1.1366e-07
SELL	2.73633	1.45224	1.15079e-07
CCR7	2.63847	1.3997	1.19233e-07
MAX	1.29111	0.368607	1.19265e-07
ANXA8L2	6.42927	2.68466	1.19265e-07
FAM171A2	0.322328	-1.6334	1.20601e-07
MAGI2	0.531459	-0.911969	1.21703e-07
KCNJ11	0.403419	-1.30965	1.30034e-07
ALDH1A1	0.216025	-2.21073	1.32375e-07
C12orf27	0.310242	-1.68853	1.36357e-07
AKAP5	1.88609	0.915399	1.4374e-07
CSF2RA	2.69039	1.42782	1.43755e-07
ART3	3.04195	1.605	1.45697e-07
PRKCQ	2.92651	1.54918	1.45702e-07
CCND2	2.55795	1.35499	1.51629e-07
C14orf167	0.632022	-0.661953	1.55953e-07
SIGLEC14	2.96187	1.56651	1.66465e-07
TNFSF14	2.43405	1.28336	1.67754e-07
RAB11FIP3	0.618625	-0.692864	1.72247e-07
LIMD2	1.66183	0.732774	1.77508e-07
TMCC3	2.25995	1.17629	1.81375e-07
IGSF11	0.322984	-1.63047	1.84285e-07
DENND1A	1.38866	0.473693	1.95492e-07
LGALS2	3.44893	1.78615	2.00913e-07
ARL11	2.29094	1.19594	2.01155e-07
C1orf198	0.693052	-0.528964	2.07782e-07
PDE6G	2.04022	1.02873	2.08158e-07
DOCK10	2.20528	1.14096	2.10873e-07
TMEM178	0.312086	-1.67998	2.11992e-07
CTTNBP2	0.275406	-1.86037	2.15646e-07
TNFRSF13B	2.79788	1.48433	2.17823e-07
SBK1	0.344689	-1.53663	2.19275e-07
CAPN5	0.32209	-1.63446	2.21917e-07
C2orf15	0.533783	-0.905674	2.2366e-07
HOOK1	0.623475	-0.681597	2.2805e-07
ADAM8	2.3157	1.21145	2.31835e-07
ALOX5	2.33837	1.22551	2.31835e-07
CAPN9	0.256628	-1.96225	2.31975e-07
BNC1	10.0736	3.33251	2.31975e-07
SLC25A13	0.696719	-0.521351	2.34321e-07
SNAI3	2.02807	1.02011	2.35687e-07
DLX6AS	0.316935	-1.65774	2.38586e-07
EML6	0.432251	-1.21006	2.42481e-07
COTL1	1.87726	0.908628	2.44932e-07
CACNA1D	0.274921	-1.86291	2.46605e-07
KIAA1324	0.175462	-2.51077	2.46757e-07
LDLRAD1	0.390299	-1.35735	2.48538e-07
ZFHX3	0.575789	-0.796387	2.5086e-07
BATF3	2.06569	1.04662	2.55814e-07
LOC151162	0.638592	-0.647035	2.55814e-07
PREX1	2.06187	1.04396	2.55814e-07
ZNF804A	1.86507	0.89923	2.56098e-07
SLC2A11	0.58393	-0.776132	2.62346e-07
TNFSF8	2.3007	1.20207	2.65669e-07
NINJ1	1.67717	0.74603	2.65669e-07
AGAP1	0.6133	-0.705335	2.66587e-07
THRA	0.628013	-0.671134	2.69186e-07
TMEM229B	2.28037	1.18927	2.74076e-07
NFKB2	1.55969	0.641258	2.77977e-07
TDGF1	0.290219	-1.78479	2.95505e-07
C4orf50	1.51172	0.596188	3.01084e-07
TSPAN3	0.597676	-0.742563	3.02977e-07
PPP1R13B	0.662524	-0.593955	3.04639e-07
TET3	0.637477	-0.649554	3.0915e-07
TLR3	2.2519	1.17114	3.14641e-07
KIAA1244	0.323172	-1.62963	3.17452e-07
PNMA6A	0.265482	-1.91331	3.28185e-07
RNF103	0.703206	-0.507981	3.33208e-07
PLCB4	0.204325	-2.29106	3.37852e-07
SQRDL	1.72568	0.787166	3.41871e-07
FOLR2	2.45617	1.29641	3.4666e-07
EMB	2.53512	1.34206	3.60324e-07
CALCOCO2	1.29105	0.368546	3.64064e-07
PPM1L	0.407743	-1.29427	3.66076e-07
HSD3B7	1.64021	0.71388	3.67932e-07
IL10	2.04251	1.03034	3.73598e-07
PLD4	3.0857	1.6256	3.82788e-07
GPR68	2.72806	1.44788	3.88332e-07
STX1B	2.17603	1.1217	3.89287e-07
BRAF	0.680842	-0.554609	4.06601e-07
MS4A8B	0.233372	-2.0993	4.07942e-07
EXPH5	0.57525	-0.797738	4.26771e-07
PLEKHA5	0.604169	-0.726975	4.34878e-07
MRC1	2.72898	1.44836	4.45332e-07
PFKFB2	0.5754	-0.797362	4.5418e-07
FAM163B	1.53053	0.614035	4.70763e-07
FNBP1L	0.602607	-0.73071	4.88117e-07
PIM2	1.77937	0.831365	4.88117e-07
GUK1	1.43723	0.523292	4.94233e-07
FAM65B	2.22789	1.15568	5.05771e-07
CNDP2	1.41152	0.497248	5.20328e-07
TSPAN12	0.337036	-1.56902	5.20789e-07
ABCD1	1.6545	0.726399	5.22315e-07
PART1	0.196713	-2.34584	5.22345e-07
CD40LG	2.32112	1.21482	5.22345e-07
SH3BP4	0.605638	-0.723473	5.22725e-07
TRIM38	1.51388	0.598247	5.24859e-07
GNAZ	0.368355	-1.44083	5.26376e-07
ACTR3B	0.619512	-0.690797	5.26376e-07
TOM1L1	0.634263	-0.656847	5.45992e-07
C6orf106	1.33961	0.421814	5.49479e-07
AKAP1	0.666109	-0.586169	5.84613e-07
ITGA4	2.11138	1.07818	6.03461e-07
LYZ	2.91724	1.5446	6.03839e-07
JPH1	0.423482	-1.23963	6.06578e-07
RGS19	1.45363	0.539664	6.14314e-07
ULBP3	0.429787	-1.21831	6.14314e-07
RIMBP2	0.258523	-1.95164	6.17721e-07
LGALS3BP	1.72557	0.787075	6.19396e-07
CMTM8	0.416536	-1.26349	6.19396e-07
C18orf21	1.34877	0.431649	6.25445e-07
ARHGAP12	0.648201	-0.625486	6.25445e-07
FOXA2	0.157336	-2.66808	6.45106e-07
HIP1R	0.722706	-0.468519	6.74989e-07
GLDC	5.66594	2.50232	6.75504e-07
TCIRG1	1.61283	0.689594	6.78398e-07
PARP8	1.89587	0.92286	6.93605e-07
OLR1	3.19758	1.67698	6.93605e-07
VWA2	0.28585	-1.80667	6.93605e-07
RFX5	1.48231	0.567846	6.97387e-07
IGFBP2	0.295329	-1.7596	7.03123e-07
GSDMC	4.22091	2.07756	7.23531e-07
MAN2B1	1.44761	0.533676	7.23874e-07
IGSF10	0.307527	-1.70122	7.48279e-07
SLC25A22	1.45913	0.545109	7.59683e-07
SLC45A3	0.493422	-1.01911	7.66345e-07
TFEB	1.51402	0.598388	7.73442e-07
SLC6A20	0.197853	-2.3375	7.74636e-07
TLR10	2.31353	1.21009	7.83852e-07
GHRL	1.91313	0.935933	7.94847e-07
C5orf58	1.87453	0.906533	8.16547e-07
RIN3	1.75367	0.81038	8.22493e-07
DNAJC22	0.270818	-1.8846	8.27327e-07
GPR109B	3.93114	1.97495	8.55234e-07
CD70	3.79195	1.92294	8.6846e-07
NR1H3	1.73318	0.793422	8.7539e-07
NAPSB	2.9062	1.53913	8.9082e-07
SYNPO	1.83675	0.877153	9.26923e-07
CFLAR	1.5061	0.590813	9.26923e-07
C6orf124	0.500125	-0.999638	9.34336e-07
METRNL	1.87222	0.90475	9.35405e-07
PPP1R1B	0.117418	-3.09027	9.47779e-07
LILRA4	2.51844	1.33253	9.5242e-07
CCL18	4.01152	2.00415	9.5846e-07
KIF3B	0.733124	-0.447871	1.01084e-06
SCG2	0.480632	-1.057	1.01469e-06
PSMA6	1.36591	0.449864	1.07353e-06
SLC29A4	0.331366	-1.5935	1.13575e-06
PSAP	1.36376	0.447595	1.14247e-06
CCDC69	1.83432	0.875242	1.14315e-06
ASGR2	1.95835	0.969636	1.15932e-06
CDH3	2.21457	1.14703	1.16011e-06
SLC19A2	0.656524	-0.607081	1.16219e-06
CCL7	2.60455	1.38103	1.16569e-06
PLCE1	0.329733	-1.60063	1.17963e-06
TNFAIP8	1.62447	0.699967	1.19185e-06
FTSJD2	1.30468	0.383691	1.19975e-06
C2orf86	0.63894	-0.646248	1.21306e-06
LOC728643	1.83401	0.875004	1.23167e-06
TM7SF2	0.528802	-0.919202	1.24416e-06
FPR1	2.21838	1.1495	1.24959e-06
GYPC	2.02158	1.01548	1.26114e-06
MLXIPL	0.268199	-1.89863	1.26177e-06
FAIM3	1.9125	0.935456	1.26987e-06
HIPK2	0.578551	-0.789484	1.27811e-06
AQP2	0.373334	-1.42146	1.28383e-06
MAST2	0.702282	-0.509878	1.29243e-06
GAS6	2.19158	1.13197	1.32957e-06
ARHGEF1	1.37905	0.463678	1.34424e-06
C6orf62	1.35633	0.439712	1.37513e-06
ADH1C	0.151363	-2.72392	1.38192e-06
AXL	2.14814	1.10308	1.40462e-06
B4GALNT3	0.397159	-1.33221	1.41525e-06
VEZF1	0.708429	-0.497305	1.45205e-06
SLC2A10	0.34388	-1.54002	1.46604e-06
STXBP4	0.647877	-0.626209	1.46672e-06
C9orf45	0.567261	-0.817915	1.46672e-06
ZMYND15	2.05165	1.03679	1.46672e-06
ACSL5	2.65503	1.40873	1.46865e-06
SHH	0.314355	-1.66953	1.47932e-06
CASD1	0.687749	-0.540047	1.47938e-06
MMP28	4.47715	2.16258	1.48056e-06
HSD11B2	0.488004	-1.03504	1.49389e-06
SLC1A3	2.86684	1.51946	1.49508e-06
STRBP	0.719288	-0.475359	1.50417e-06
CYB5RL	0.629484	-0.667758	1.52234e-06
EIF4E3	1.62405	0.699594	1.53304e-06
LRRC20	0.565501	-0.822398	1.53848e-06
KIAA1598	0.654687	-0.611122	1.54007e-06
KIAA1257	0.337406	-1.56744	1.55142e-06
CD1D	2.08248	1.0583	1.562e-06
CNST	0.733338	-0.44745	1.57978e-06
GDA	0.172079	-2.53886	1.59743e-06
C14orf174	0.522766	-0.935764	1.59743e-06
DEPDC6	0.320303	-1.64249	1.59743e-06
GALNT7	0.521835	-0.938334	1.60607e-06
LILRA2	2.04493	1.03205	1.62081e-06
SLC37A3	0.73915	-0.436061	1.62303e-06
ProSAPiP1	0.452116	-1.14524	1.62388e-06
FKBP5	1.80166	0.849323	1.62388e-06
CRYM	0.19466	-2.36097	1.6721e-06
TMSB10	1.56753	0.648496	1.68084e-06
UTS2	2.61358	1.38603	1.71497e-06
S100A16	1.88958	0.918065	1.72539e-06
CLMN	0.526467	-0.925585	1.73196e-06
FSCN2	0.491478	-1.0248	1.7405e-06
SUN1	0.740006	-0.43439	1.74766e-06
CARD11	2.54283	1.34644	1.76993e-06
RHOBTB1	0.547637	-0.868707	1.79937e-06
LIF	0.384368	-1.37944	1.81775e-06
CSF3R	2.29205	1.19664	1.82893e-06
CTSL1	1.97679	0.983158	1.84089e-06
PLEKHO1	1.72762	0.788783	1.84946e-06
DPY19L2P4	0.487536	-1.03642	1.85918e-06
PECAM1	1.70994	0.773944	1.86237e-06
ZNRF3	0.608135	-0.717536	1.86396e-06
NUCB1	1.33627	0.418212	1.91262e-06
AQP11	0.574354	-0.799987	1.94175e-06
MR1	1.74232	0.801012	1.9471e-06
GBP6	9.27143	3.21279	1.96603e-06
TMEM106A	1.65135	0.723648	1.99609e-06
MOBKL2A	1.38933	0.474392	1.9968e-06
S100A8	7.36238	2.88017	2.00092e-06
SNX4	0.761399	-0.393275	2.00926e-06
FZD8	0.380006	-1.39591	2.01778e-06
WDR20	0.793064	-0.33449	2.02357e-06
LOC202781	0.640846	-0.64195	2.06624e-06
TIGD4	0.483327	-1.04893	2.06916e-06
CCL1	1.38721	0.47219	2.0789e-06
AGTRAP	1.55257	0.634656	2.08011e-06
RAB40B	0.608928	-0.715657	2.08673e-06
GGTA1	2.31934	1.21372	2.10075e-06
DLGAP1	0.329662	-1.60094	2.12821e-06
SARDH	2.27451	1.18555	2.16214e-06
PSMB7	1.36602	0.449981	2.20065e-06
BEND3	0.698715	-0.517223	2.24861e-06
PSMA3	1.28819	0.365341	2.26136e-06
SGSM2	0.668716	-0.580535	2.26606e-06
TIMD4	1.92182	0.942472	2.2757e-06
LRRC31	0.233115	-2.10088	2.2757e-06
PCDHAC2	0.272204	-1.87724	2.27764e-06
ICAM4	3.58653	1.84259	2.30528e-06
CASC3	0.805016	-0.312911	2.30528e-06
NBPF3	0.504592	-0.98681	2.30865e-06
SERPINB9	1.89609	0.923029	2.35947e-06
IFIT1B	1.35248	0.435606	2.41427e-06
NCF4	1.98313	0.987778	2.4307e-06
SRGAP1	0.562925	-0.828985	2.44396e-06
PSMA4	1.33889	0.421041	2.47016e-06
CLEC6A	1.76007	0.815633	2.47559e-06
USP34	0.761567	-0.392957	2.50899e-06
SOCS4	0.782272	-0.354259	2.54081e-06
MAP7D1	1.44047	0.52654	2.54198e-06
ZBTB10	0.429565	-1.21905	2.54457e-06
KLRB1	2.621	1.39012	2.56178e-06
SLC3A1	0.321637	-1.6365	2.65477e-06
CPLX2	0.32639	-1.61533	2.66654e-06
OCLN	0.522526	-0.936424	2.674e-06
CASC4	0.685522	-0.544725	2.72402e-06
NTRK1	2.00554	1.00399	2.77499e-06
LGALS9	1.96004	0.970885	2.78874e-06
INPP5A	0.737143	-0.439983	2.94024e-06
LEFTY1	0.305183	-1.71225	3.06322e-06
ABT1	1.28464	0.361366	3.0633e-06
STX3	0.712937	-0.488154	3.1038e-06
DYSF	1.99261	0.99466	3.13985e-06
SPIB	2.63874	1.39985	3.15285e-06
ARPC2	1.38739	0.472377	3.18165e-06
UBN2	0.730773	-0.452505	3.2126e-06
ACN9	0.705473	-0.503338	3.23181e-06
IL20RB	4.89259	2.2906	3.23181e-06
C20orf117	0.650091	-0.621286	3.31466e-06
ATP8B1	0.600294	-0.736258	3.33253e-06
C20orf112	0.515219	-0.956741	3.33862e-06
RNFT2	0.4819	-1.0532	3.34653e-06
LRRC33	1.82462	0.867598	3.37605e-06
PGM2L1	0.491987	-1.02331	3.38813e-06
S100A9	5.44958	2.44615	3.41143e-06
MT2A	2.28817	1.1942	3.41153e-06
XIRP1	2.58101	1.36793	3.45262e-06
C10orf108	0.310462	-1.68751	3.61031e-06
TREML1	1.66615	0.736521	3.67933e-06
BAT5	1.34649	0.429202	3.72633e-06
C2orf85	1.75648	0.81269	3.79831e-06
LRP4	0.333837	-1.58278	3.80879e-06
PLP2	1.6892	0.756341	3.90168e-06
P2RY12	2.15867	1.11014	3.90431e-06
BFSP2	1.78231	0.833746	3.96637e-06
VAMP3	1.31735	0.397639	4.0275e-06
AQP6	0.310898	-1.68548	4.03611e-06
CLEC2D	1.37032	0.454516	4.03611e-06
SDS	2.10884	1.07645	4.04982e-06
AADAT	0.322407	-1.63305	4.16033e-06
TPP1	1.35479	0.438071	4.18587e-06
CARD6	2.16661	1.11544	4.20464e-06
TSPAN13	0.534062	-0.904922	4.20925e-06
KSR2	0.350078	-1.51425	4.33699e-06
SLFN14	1.4805	0.566088	4.35596e-06
NYNRIN	0.404661	-1.30522	4.38113e-06
CBX6	0.509172	-0.973775	4.40738e-06
EMILIN2	1.64238	0.715786	4.4519e-06
FLVCR1	0.656645	-0.606815	4.46966e-06
MVP	1.51696	0.601186	4.52226e-06
TICAM2	1.88526	0.914763	4.53051e-06
AGBL5	0.718421	-0.477099	4.53051e-06
TPD52	0.676343	-0.564174	4.56065e-06
ZNF711	0.322658	-1.63192	4.66064e-06
NT5DC3	0.577057	-0.793215	4.68497e-06
TREX1	1.58001	0.659937	4.73078e-06
CALR	1.32735	0.408552	4.8563e-06
NT5C3	1.41131	0.497039	4.86333e-06
GSDMB	2.02189	1.0157	4.8745e-06
HIVEP3	2.09397	1.06624	4.9177e-06
NAA40	0.749361	-0.416267	4.93052e-06
NAPA	1.35129	0.434336	4.93052e-06
DAXX	1.2599	0.333306	4.9522e-06
NCF2	1.85452	0.891043	4.96655e-06
GPR55	2.18278	1.12617	5.02361e-06
TRPM2	2.11422	1.08012	5.08696e-06
KLHDC5	0.718763	-0.476412	5.197e-06
CLDN12	0.705639	-0.502997	5.23451e-06
EXTL2	0.618292	-0.693641	5.25405e-06
BEND4	1.9085	0.93244	5.2542e-06
PHYH	0.54054	-0.887528	5.28217e-06
TDGF3	0.540562	-0.887469	5.30421e-06
CCDC114	0.342079	-1.5476	5.31985e-06
STEAP2	0.450493	-1.15042	5.33302e-06
CPT1A	0.624577	-0.679048	5.34212e-06
CYTSA	0.766966	-0.382766	5.38005e-06
IL22RA2	2.68496	1.4249	5.38259e-06
LRRN3	2.12803	1.08952	5.38259e-06
TUBB6	1.98181	0.986821	5.38259e-06
PSMA8	1.35562	0.438958	5.47541e-06
PACS2	0.748473	-0.417977	5.53204e-06
SLC26A5	0.466748	-1.09928	5.55472e-06
RNF114	1.25465	0.327283	5.58024e-06
FARP2	0.621759	-0.685572	5.63911e-06
RNF166	1.48097	0.566538	5.64841e-06
KRT5	8.39531	3.06958	5.73346e-06
CCDC121	0.665961	-0.58649	5.88044e-06
CDC14A	0.548708	-0.865889	5.89753e-06
CDHR3	0.43533	-1.19982	5.93459e-06
SIRPB1	2.02668	1.01912	6.00477e-06
TNFSF4	1.95599	0.967899	6.01184e-06
DPF3	1.96964	0.977935	6.02365e-06
DACH1	0.310927	-1.68535	6.04507e-06
GJB1	0.178049	-2.48966	6.05551e-06
GLIPR2	1.8207	0.864495	6.13367e-06
EIF2AK2	1.44081	0.526883	6.15853e-06
DNALI1	0.21745	-2.20124	6.15853e-06
GNA15	2.13761	1.096	6.18081e-06
TMEM97	0.640079	-0.643679	6.31608e-06
IL28A	1.50615	0.590867	6.36531e-06
EXT1	1.49427	0.579445	6.3664e-06
LOC100144604	0.409579	-1.28779	6.41423e-06
C20orf141	2.26411	1.17895	6.41434e-06
SH3BGRL2	0.392923	-1.34768	6.41811e-06
RABGGTA	1.35802	0.441506	6.47926e-06
NAGPA	1.31708	0.397341	6.52135e-06
LRRC49	0.562032	-0.831275	6.52637e-06
CISH	1.67478	0.743969	6.54397e-06
KRT14	14.5304	3.861	6.54397e-06
FZD5	0.581599	-0.781903	6.60248e-06
MYD88	1.3932	0.478404	6.90219e-06
SLC45A1	0.505931	-0.982988	6.92225e-06
CD97	1.83322	0.874381	6.99345e-06
PRKAA2	0.274618	-1.8645	7.03484e-06
LOC148709	0.449159	-1.1547	7.04297e-06
TMEM213	0.292355	-1.77421	7.04297e-06
IL7	1.92021	0.941266	7.13004e-06
CHKA	0.603185	-0.729328	7.13004e-06
WDR35	0.640934	-0.641752	7.21682e-06
TNFRSF17	3.08223	1.62398	7.23663e-06
AMZ1	1.97629	0.982794	7.27214e-06
EMR4P	1.89128	0.919361	7.33009e-06
TFF3	0.130298	-2.94011	7.35346e-06
PRPH	0.372334	-1.42533	7.40591e-06
SLC6A12	2.48555	1.31356	7.42979e-06
BTN2A1	1.45713	0.543133	7.49315e-06
CD1B	2.31388	1.21031	7.57792e-06
SH2D1B	2.28083	1.18956	7.60259e-06
NBEA	0.30543	-1.71109	7.63924e-06
KIAA1958	0.615958	-0.699096	7.71091e-06
POFUT1	0.758066	-0.399604	7.79397e-06
VAV1	2.01159	1.00834	7.90275e-06
C2orf70	0.351855	-1.50695	7.90275e-06
SAA1	4.10905	2.0388	7.92595e-06
KIAA0415	1.27366	0.34898	7.92595e-06
AKAP6	0.54788	-0.868068	7.92595e-06
RNH1	1.3044	0.383391	8.00135e-06
ATP9A	0.632092	-0.661794	8.01377e-06
RNF149	1.30186	0.380577	8.04605e-06
GPR109A	3.50514	1.80947	8.08983e-06
RHOV	2.54109	1.34544	8.26976e-06
GAL3ST1	0.300039	-1.73678	8.29703e-06
SOX5	0.417894	-1.25879	8.3668e-06
ADORA2A	1.70933	0.773427	8.62009e-06
C19orf38	2.04337	1.03095	8.63577e-06
VWA5B2	0.412872	-1.27623	8.67005e-06
BIRC3	2.40527	1.2662	8.80623e-06
JOSD2	1.53146	0.61491	8.86267e-06
IL4R	1.72888	0.789838	8.9931e-06
C2orf72	0.2852	-1.80995	8.9962e-06
C6orf47	1.25463	0.327262	9.00638e-06
PLA2G12A	0.772107	-0.373127	9.27779e-06
PKD2L1	1.79424	0.843375	9.37949e-06
LOC145837	0.419101	-1.25463	9.49834e-06
SH3RF1	0.621481	-0.686219	9.55713e-06
ONECUT1	0.534394	-0.904024	9.63519e-06
SIGLEC11	2.16458	1.11409	9.86432e-06
SEMA3F	1.55822	0.639902	9.93474e-06
GCH1	1.54687	0.629349	9.93474e-06
UPF0639	0.412441	-1.27774	9.95964e-06
ABCD3	0.723228	-0.467478	1.00875e-05
ZC3H14	0.792601	-0.335333	1.01915e-05
LOC728819	0.419115	-1.25458	1.01943e-05
RAB39	1.88656	0.915758	1.02676e-05
BAG5	0.802574	-0.317294	1.02691e-05
IFT81	0.634482	-0.656348	1.0439e-05
ANO7	0.528402	-0.920293	1.05035e-05
FBXO2	3.08668	1.62606	1.0524e-05
STX1A	0.592882	-0.754184	1.06521e-05
CENPV	0.390934	-1.355	1.06856e-05
FAM49B	1.33904	0.421194	1.07508e-05
DBH	1.96925	0.977644	1.0836e-05
KMO	2.08905	1.06285	1.08453e-05
SIRPA	1.92053	0.941508	1.09316e-05
IL17RB	0.458771	-1.12415	1.09977e-05
CCL22	2.23168	1.15813	1.10652e-05
SORT1	0.550503	-0.861178	1.11449e-05
PDZD8	0.567225	-0.818007	1.11497e-05
ALOX15B	3.91378	1.96856	1.14094e-05
NPC1L1	0.434565	-1.20236	1.18149e-05
ZDHHC1	0.60808	-0.717666	1.19452e-05
FXYD5	1.96744	0.97632	1.21754e-05
C19orf45	0.484031	-1.04683	1.22448e-05
ADAMTSL4	2.94293	1.55725	1.25012e-05
PRICKLE2	0.536192	-0.899178	1.25195e-05
GBAS	0.714882	-0.484223	1.25571e-05
CASKIN1	0.428195	-1.22366	1.26369e-05
PLEKHG1	0.513901	-0.960437	1.26941e-05
SAMD13	0.497657	-1.00678	1.26966e-05
C9orf152	0.207115	-2.2715	1.2798e-05
CD160	1.88983	0.918256	1.29074e-05
ZMYND11	0.752256	-0.410705	1.29276e-05
LACTB	1.3343	0.416088	1.29323e-05
BLK	2.43859	1.28605	1.30582e-05
KIR3DX1	1.35854	0.442056	1.30847e-05
GBGT1	1.80771	0.854161	1.32555e-05
FAM49A	1.98483	0.989015	1.3417e-05
ITGAD	2.24126	1.16431	1.34824e-05
HS2ST1	0.782937	-0.353032	1.35276e-05
P2RX5	1.74082	0.799771	1.36048e-05
PCMTD2	0.719332	-0.475271	1.37226e-05
HSH2D	2.20605	1.14147	1.38516e-05
CDC14B	0.571467	-0.807258	1.39338e-05
RGS9	2.08925	1.06298	1.40155e-05
CD19	2.75773	1.46348	1.40259e-05
AQP7	0.36007	-1.47365	1.4089e-05
KLHL23	0.438106	-1.19065	1.41676e-05
XCL1	2.4264	1.27882	1.42745e-05
ST3GAL5	1.8763	0.907894	1.4309e-05
CNTNAP1	0.604855	-0.72534	1.45657e-05
LOC728723	0.550739	-0.86056	1.45657e-05
KCNH2	0.290052	-1.78562	1.46391e-05
MAT2B	1.29406	0.371907	1.47828e-05
SFN	2.49164	1.3171	1.47943e-05
HSPA6	1.95096	0.964187	1.49156e-05
TTC25	0.387109	-1.36919	1.49877e-05
GRAP	1.62895	0.703941	1.5083e-05
APOBEC4	0.576604	-0.794348	1.51322e-05
GPATCH3	1.26807	0.342632	1.52891e-05
PDE5A	0.545323	-0.874817	1.53682e-05
MIPOL1	0.597573	-0.742813	1.56075e-05
MLH3	0.781209	-0.35622	1.58871e-05
ARVCF	0.611572	-0.709406	1.5917e-05
DNMBP	0.668823	-0.580304	1.60528e-05
MCF2L	0.411257	-1.28189	1.60941e-05
GAL3ST2	0.371358	-1.42912	1.60971e-05
PNMA2	0.33051	-1.59723	1.61654e-05
CABLES1	0.490105	-1.02884	1.61676e-05
DNAJC5B	2.2492	1.16941	1.61718e-05
MGC29506	3.43856	1.7818	1.63601e-05
MLL3	0.698654	-0.51735	1.64705e-05
TXNDC6	0.514877	-0.957702	1.66641e-05
FAM18A	1.85319	0.890012	1.68187e-05
PSMA1	1.23921	0.309421	1.68187e-05
CORO7	1.38447	0.469334	1.68285e-05
TMEM211	0.419337	-1.25382	1.70863e-05
MBTD1	0.750934	-0.413242	1.71323e-05
ZC3HAV1L	0.521833	-0.938341	1.73567e-05
STK17B	1.40805	0.493697	1.75426e-05
PLEKHB1	0.3767	-1.40851	1.76067e-05
CD79A	3.11599	1.63969	1.77919e-05
KIAA0114	0.636331	-0.65215	1.77919e-05
SCGB2A1	0.165107	-2.59853	1.78265e-05
CLDN3	0.186909	-2.4196	1.7879e-05
VIL1	0.240044	-2.05863	1.79265e-05
KIAA0232	0.725391	-0.463169	1.79491e-05
C3orf54	2.49684	1.3201	1.83898e-05
ANKRD55	1.66377	0.734454	1.84052e-05
GALNT11	0.697004	-0.520762	1.85487e-05
MFSD6	0.702287	-0.509867	1.86976e-05
PI4K2A	1.34257	0.424998	1.88121e-05
CCR6	1.79061	0.840449	1.88121e-05
DPEP2	1.99794	0.998515	1.88121e-05
C1orf168	0.344207	-1.53865	1.88837e-05
MTA1	0.768148	-0.380544	1.88837e-05
VAMP8	1.41158	0.497313	1.88988e-05
TSPAN6	0.684076	-0.547772	1.90342e-05
FAM36A	0.72204	-0.46985	1.90342e-05
N4BP1	1.3542	0.437444	1.9067e-05
FGF17	0.473835	-1.07754	1.91157e-05
RNASE1	1.89082	0.919009	1.92563e-05
MCL1	1.37699	0.461519	1.92942e-05
HNF1A	0.420142	-1.25105	1.93553e-05
CSPP1	0.720976	-0.471977	1.94736e-05
FGFR1	0.431866	-1.21134	2.01244e-05
ITPR2	1.65827	0.729678	2.01244e-05
C15orf17	0.783582	-0.351843	2.03879e-05
LRIG1	0.496786	-1.0093	2.04215e-05
RIPK1	1.26933	0.344072	2.04466e-05
PNMA1	0.692634	-0.529835	2.04679e-05
ZC3H12D	1.79219	0.841722	2.05232e-05
CAPS	0.37471	-1.41615	2.07285e-05
NPHP1	0.463784	-1.10848	2.07833e-05
C17orf28	0.357386	-1.48444	2.13669e-05
BTBD7	0.730708	-0.452634	2.13719e-05
LRRC17	0.378188	-1.40282	2.16064e-05
RASSF5	1.74832	0.805966	2.1858e-05
NFATC4	0.482459	-1.05152	2.22383e-05
SLC29A2	0.590493	-0.760007	2.30772e-05
GAPT	1.96571	0.975053	2.31051e-05
PELI1	0.646558	-0.629148	2.31063e-05
TNFRSF1A	1.37452	0.458929	2.31263e-05
WNT1	1.76133	0.816662	2.32052e-05
RNF183	0.290054	-1.78561	2.33176e-05
RSPH4A	0.423257	-1.24039	2.33357e-05
HLX	1.68422	0.752078	2.35058e-05
C14orf73	2.76884	1.46928	2.36947e-05
FES	1.71136	0.775144	2.37279e-05
FAM83A	3.9375	1.97728	2.3937e-05
SOX15	3.62521	1.85806	2.41427e-05
TGM1	4.1072	2.03815	2.41427e-05
ARPC1B	1.42507	0.511036	2.44274e-05
TRAK1	0.697726	-0.519268	2.4439e-05
EVL	1.59424	0.672865	2.45439e-05
RAB15	0.571662	-0.806766	2.47638e-05
SIK1	1.98083	0.986106	2.49352e-05
LOC100286844	0.651005	-0.61926	2.50757e-05
PANK3	0.696273	-0.522276	2.51342e-05
TLR4	1.92096	0.941829	2.51636e-05
C19orf77	0.340115	-1.5559	2.53151e-05
RALGPS1	0.588516	-0.764846	2.54035e-05
HRAS	1.46942	0.555246	2.5449e-05
COL24A1	0.494318	-1.01649	2.5542e-05
SPDYA	0.642596	-0.638016	2.5714e-05
MITD1	1.24581	0.317082	2.59171e-05
TMEM35	0.330826	-1.59585	2.60997e-05
CREB5	0.437713	-1.19194	2.60997e-05
RGS20	2.63083	1.39552	2.63444e-05
KDELR3	0.519303	-0.945353	2.68577e-05
CCDC48	0.454269	-1.13838	2.68577e-05
IL3RA	1.75668	0.812855	2.6923e-05
MAGI1	0.534658	-0.903313	2.70347e-05
SIGLEC16	1.74278	0.801388	2.70731e-05
PIP5K1B	0.323682	-1.62735	2.71083e-05
C9orf140	0.649728	-0.622092	2.72854e-05
HCCS	1.28023	0.356408	2.73468e-05
PLEKHH2	0.382539	-1.38632	2.73786e-05
PYCARD	1.7397	0.79884	2.74065e-05
ATP6V0C	1.27718	0.352958	2.76662e-05
KBTBD8	1.78874	0.838942	2.77981e-05
NOD1	1.31959	0.400086	2.7958e-05
ANKS6	0.597023	-0.744142	2.7958e-05
ALCAM	0.436749	-1.19512	2.8224e-05
CGNL1	0.4162	-1.26465	2.82358e-05
MIAT	2.25866	1.17547	2.82857e-05
TSPYL3	0.475137	-1.07358	2.82857e-05
CDC42BPB	0.735768	-0.442678	2.82969e-05
PRSS33	0.40071	-1.31937	2.90389e-05
PPP1R2P9	1.19956	0.262509	2.92256e-05
HIST1H3D	1.78742	0.837876	2.93018e-05
TM6SF1	1.49007	0.575378	2.9587e-05
PATZ1	0.651436	-0.618304	2.97294e-05
ZRANB1	0.804018	-0.314701	2.99879e-05
C9orf24	0.385134	-1.37657	3.00986e-05
C1QTNF8	0.69427	-0.526432	3.02268e-05
CD47	1.47594	0.561631	3.02393e-05
BSN	0.502122	-0.993889	3.05196e-05
LOC646851	0.46631	-1.10064	3.07015e-05
ARHGAP22	1.97769	0.983814	3.07097e-05
MICA	1.47878	0.564406	3.07518e-05
ATP2B1	0.669997	-0.577772	3.08845e-05
TTC23L	0.535628	-0.900696	3.09908e-05
MAFB	2.064	1.04544	3.11371e-05
TMEM184B	0.756662	-0.402279	3.11492e-05
RAB27A	1.40968	0.495363	3.11492e-05
FCRLA	2.45836	1.2977	3.15076e-05
NPL	1.8414	0.880805	3.16131e-05
UBA6	1.43167	0.517696	3.16131e-05
HGD	0.210465	-2.24835	3.16692e-05
PPP1R13L	1.66031	0.731449	3.20567e-05
FRAS1	0.282509	-1.82363	3.20567e-05
OSBPL10	0.616439	-0.69797	3.21234e-05
PLSCR4	2.08261	1.05839	3.21234e-05
LOC642587	4.60023	2.20171	3.22161e-05
RALGAPA1	0.730341	-0.453358	3.26637e-05
SLC25A21	0.516446	-0.953311	3.29128e-05
GATA3	2.5232	1.33525	3.30381e-05
FCRL5	2.99974	1.58484	3.34272e-05
DSE	1.62645	0.70173	3.34312e-05
SHF	0.50714	-0.979544	3.36978e-05
TTC39A	0.457119	-1.12936	3.39712e-05
PSD3	0.550758	-0.860509	3.41669e-05
ANGEL1	0.734905	-0.44437	3.4507e-05
CYP2B6	0.346292	-1.52994	3.47298e-05
UTF1	1.23097	0.2998	3.50082e-05
GNAI2	1.25341	0.325853	3.50568e-05
GFOD1	1.85558	0.89187	3.53031e-05
GPX1	1.49171	0.576964	3.53301e-05
MOBKL2B	1.67956	0.748082	3.54229e-05
GTSF1L	1.50486	0.589627	3.54297e-05
GPR114	2.0563	1.04005	3.59188e-05
CA2	2.71529	1.44111	3.59925e-05
CYB5R1	1.53254	0.61592	3.61853e-05
OMP	0.728779	-0.456448	3.65218e-05
GPR87	4.34874	2.1206	3.66224e-05
C3orf57	0.30907	-1.69399	3.66901e-05
C4orf19	0.338889	-1.56112	3.69709e-05
SERINC4	0.558272	-0.840961	3.69709e-05
MOCOS	1.93516	0.952452	3.72209e-05
KCNG3	0.442629	-1.17583	3.7511e-05
UGDH	0.603829	-0.727788	3.75259e-05
GFPT1	0.660867	-0.597567	3.7567e-05
CDC14C	0.61932	-0.691242	3.76905e-05
IVD	0.662586	-0.59382	3.77459e-05
DPY19L3	0.560362	-0.835569	3.77528e-05
DRAP1	1.34632	0.429025	3.80175e-05
RNF31	1.2046	0.268555	3.83418e-05
SCUBE3	0.36969	-1.43561	3.83418e-05
LOC283332	0.738353	-0.437617	3.83418e-05
ZNF652	0.751349	-0.412445	3.84047e-05
SNCG	3.13496	1.64845	3.84047e-05
TBC1D8	0.686943	-0.541739	3.85188e-05
KLHL14	0.260181	-1.94241	3.87219e-05
TMEM181	0.735212	-0.443768	3.87605e-05
C11orf61	0.700478	-0.513587	3.89033e-05
RAB8B	1.36763	0.451674	3.89184e-05
TMEM90B	0.413226	-1.275	3.91229e-05
FCRL4	1.80969	0.855739	3.92805e-05
LOC96610	2.94624	1.55887	3.9416e-05
FCER2	1.82153	0.865154	3.94322e-05
KIAA0319	0.313086	-1.67537	3.94644e-05
SLC11A2	0.694336	-0.526294	3.95147e-05
PROM1	0.14754	-2.76082	3.95766e-05
TGFB1	1.67592	0.744952	3.9598e-05
KARS	1.24953	0.321388	3.98186e-05
C11orf54	0.709864	-0.494385	3.98704e-05
PACRG	0.445607	-1.16616	4.00079e-05
CXCL16	1.57453	0.654921	4.00079e-05
C9orf91	1.33626	0.418204	4.02689e-05
TLR1	1.77804	0.830287	4.04275e-05
HHAT	0.598212	-0.741272	4.09152e-05
ARID2	0.773464	-0.370595	4.09889e-05
FAM168B	0.773491	-0.370544	4.11963e-05
PREX2	0.398682	-1.32669	4.11963e-05
RARG	1.52922	0.612797	4.11963e-05
NR2C1	0.774443	-0.368769	4.12299e-05
MGAT1	1.2682	0.342781	4.12299e-05
OTOA	1.70865	0.772853	4.12568e-05
ATRN	0.738657	-0.437023	4.12568e-05
ASMT	1.37913	0.46376	4.12632e-05
TNF	2.12195	1.08539	4.13289e-05
NME5	0.361057	-1.4697	4.1533e-05
GPR31	1.2848	0.36154	4.16499e-05
TIGD3	0.632581	-0.660679	4.18122e-05
LOC100303728	0.675605	-0.565748	4.18557e-05
SREBF1	1.51487	0.599192	4.25349e-05
DKFZp686O24166	0.407767	-1.29418	4.25602e-05
SLC28A2	0.311498	-1.6827	4.25602e-05
MYO5B	0.604978	-0.725044	4.25742e-05
CCDC148	0.538584	-0.892757	4.26046e-05
VENTX	1.7556	0.811965	4.26568e-05
AK2	1.24472	0.315819	4.26568e-05
AMPD3	1.60971	0.686803	4.26603e-05
CGN	0.478768	-1.0626	4.30943e-05
MYRIP	0.393659	-1.34498	4.37492e-05
C9orf46	1.47571	0.561407	4.4064e-05
LRRC10B	0.389596	-1.35995	4.41449e-05
GLIS3	0.40892	-1.29011	4.47905e-05
MRPS18C	1.26255	0.336344	4.47946e-05
IFNB1	1.40769	0.493326	4.50985e-05
EPB49	0.60139	-0.733627	4.54787e-05
ADAM6	3.77283	1.91565	4.54787e-05
SLC26A2	0.57461	-0.799344	4.56221e-05
CSNK2B	1.28534	0.362148	4.56221e-05
ASB2	2.38064	1.25135	4.57244e-05
BBS1	0.732393	-0.44931	4.58239e-05
RMND5A	0.784435	-0.350275	4.60808e-05
NUBPL	0.755873	-0.403784	4.60808e-05
SYNJ2BP	0.800646	-0.320763	4.61417e-05
SPATC1	1.52884	0.612442	4.64127e-05
MYH7B	0.485416	-1.04271	4.65503e-05
GPRIN3	1.99763	0.998291	4.67125e-05
ROPN1	0.508036	-0.976996	4.67125e-05
C9orf171	0.388512	-1.36397	4.67829e-05
KCNK13	1.9147	0.937121	4.69898e-05
ZBED3	0.522841	-0.935557	4.69898e-05
UNC119B	0.68607	-0.543572	4.70603e-05
LOC100286793	1.46283	0.548758	4.70603e-05
LARP6	0.496555	-1.00998	4.71009e-05
PLAGL2	0.721923	-0.470084	4.78761e-05
TCP11L2	0.610761	-0.711321	4.79501e-05
DNAH6	0.364298	-1.45681	4.85364e-05
CHST6	0.322235	-1.63382	4.86848e-05
NLK	0.799844	-0.32221	4.88162e-05
HCG4	2.73225	1.45009	4.90348e-05
APOBEC3C	1.56638	0.647435	4.90348e-05
SC5DL	0.67583	-0.565268	4.90348e-05
MICAL1	1.49854	0.583554	4.92544e-05
GPD1L	0.648376	-0.625096	4.93699e-05
ESRRG	0.332933	-1.58669	4.95824e-05
RTDR1	0.521028	-0.940566	4.99707e-05
STXBP5L	0.418079	-1.25815	5.03012e-05
SFMBT2	2.07179	1.05088	5.04399e-05
CHD3	0.728792	-0.456422	5.05041e-05
DLX6	0.286995	-1.8009	5.06298e-05
FITM2	0.678486	-0.559609	5.06298e-05
C1QL4	0.404226	-1.30677	5.12138e-05
CCDC151	0.443635	-1.17255	5.17134e-05
MORN5	0.422791	-1.24198	5.297e-05
MRPS10	1.23844	0.308528	5.34244e-05
RAB4B	1.36004	0.443649	5.35513e-05
GPAM	0.740449	-0.433528	5.37204e-05
CBR3	2.00963	1.00693	5.38303e-05
GLRX5	0.799037	-0.323666	5.39045e-05
EML4	0.750969	-0.413175	5.39045e-05
SERTAD1	1.46228	0.548223	5.39045e-05
C8G	1.77422	0.827188	5.40701e-05
C9orf117	0.512287	-0.964977	5.45702e-05
DPY19L2P2	0.461961	-1.11416	5.4626e-05
P2RX7	2.28376	1.19141	5.49652e-05
RALGAPA2	0.490855	-1.02663	5.49877e-05
GK5	0.720112	-0.473707	5.50507e-05
BST1	1.76009	0.815651	5.54152e-05
FRY	0.514709	-0.958172	5.542e-05
KALRN	0.465322	-1.1037	5.56354e-05
CCL19	3.75112	1.90732	5.68285e-05
PCDH20	0.419887	-1.25193	5.70448e-05
BFSP1	0.608843	-0.715859	5.70523e-05
AHCY	0.76424	-0.387903	5.70523e-05
ST6GALNAC1	0.309106	-1.69383	5.70695e-05
LOC146336	0.306305	-1.70696	5.87157e-05
C12orf70	1.87825	0.909386	5.87157e-05
MEST	0.581317	-0.782603	5.90212e-05
AGBL4	0.580285	-0.785166	5.91483e-05
FAM174B	0.433279	-1.20663	5.98953e-05
ZNF713	0.654239	-0.612111	6.03815e-05
DNAJA1	1.34691	0.429654	6.03815e-05
SS18L1	0.766945	-0.382805	6.114e-05
MLPH	0.321634	-1.63651	6.12062e-05
PEX1	0.737525	-0.439236	6.13186e-05
HYDIN	0.363805	-1.45876	6.13847e-05
PSMG4	1.44594	0.532012	6.20143e-05
SNRPC	1.275	0.350503	6.21306e-05
ZNF496	0.723427	-0.467082	6.22609e-05
NARS2	0.748615	-0.417705	6.22609e-05
GRPR	0.582365	-0.780004	6.26179e-05
PHLDA3	1.63415	0.70854	6.26875e-05
CKMT2	0.442429	-1.17648	6.27134e-05
ARHGDIG	0.532335	-0.909592	6.33919e-05
MCOLN1	1.29082	0.368283	6.35275e-05
UBE2D3	1.20445	0.268369	6.35442e-05
ANKS4B	0.327754	-1.60932	6.37142e-05
CNR2	1.62436	0.69987	6.37559e-05
ARL13B	0.655722	-0.608843	6.42632e-05
TUSC5	1.52784	0.611498	6.47282e-05
METTL7A	0.463411	-1.10964	6.48284e-05
LOC285830	1.72435	0.786055	6.49046e-05
DEGS2	0.327206	-1.61173	6.52898e-05
LOC92659	0.577708	-0.791588	6.53734e-05
RAB31	1.75501	0.811482	6.5843e-05
AXIN2	0.41585	-1.26587	6.59253e-05
RAB35	1.21081	0.275977	6.62381e-05
ALS2	0.777817	-0.362497	6.70803e-05
ACE2	2.44512	1.2899	6.72557e-05
SLC30A2	0.311488	-1.68275	6.74604e-05
FAM136A	0.785028	-0.349184	6.7871e-05
TRADD	1.37622	0.46071	6.79877e-05
ABCB1	2.00551	1.00397	6.81874e-05
AQP4	0.40669	-1.298	6.82321e-05
TSGA10	0.614008	-0.70367	6.85041e-05
ZNF774	0.638919	-0.646295	6.85756e-05
SLC25A36	0.752158	-0.410893	6.85756e-05
SH3BGRL3	1.45753	0.543524	6.91807e-05
CAPSL	0.39044	-1.35683	6.93036e-05
GPR132	1.76162	0.816899	6.95145e-05
SIPA1L3	0.71345	-0.487117	6.95977e-05
PSMG1	1.35871	0.442233	6.95977e-05
FHL3	1.4308	0.516823	6.98501e-05
TSC22D4	1.30139	0.380049	6.99817e-05
C16orf89	0.332094	-1.59033	6.99817e-05
SGCE	0.408456	-1.29175	7.00189e-05
TXNRD1	0.61799	-0.694345	7.00254e-05
WDR31	0.538039	-0.894218	7.00254e-05
CLRN3	0.342595	-1.54542	7.06429e-05
SLC39A9	0.84142	-0.249102	7.0843e-05
CX3CL1	2.3296	1.22008	7.17475e-05
PPM1B	0.808662	-0.30639	7.17769e-05
ASRGL1	0.356817	-1.48674	7.17769e-05
CCL25	1.87558	0.907335	7.24984e-05
GLYATL3	0.455741	-1.13371	7.24984e-05
TPM3	1.1944	0.256287	7.2512e-05
LCLAT1	0.769786	-0.377471	7.25881e-05
TTPA	0.5311	-0.912945	7.29848e-05
KRT6A	6.90931	2.78854	7.33896e-05
PLAC8	3.17939	1.66875	7.34849e-05
KRBA2	0.609225	-0.714953	7.37682e-05
PPM1M	1.40239	0.487883	7.44783e-05
RHPN2	0.491064	-1.02602	7.46779e-05
STAMBPL1	1.58541	0.664854	7.50908e-05
FLRT1	0.591463	-0.75764	7.53253e-05
GDF11	0.591235	-0.758196	7.57788e-05
GLYATL2	0.246672	-2.01933	7.63345e-05
ADRA1B	0.443565	-1.17278	7.68453e-05
PNMT	0.36659	-1.44776	7.68523e-05
TMEM209	0.789601	-0.340804	7.68771e-05
CACNA2D4	1.5107	0.59522	7.68771e-05
PSMA2	1.28616	0.363066	7.68771e-05
CCDC33	0.398319	-1.328	7.70423e-05
ELAVL4	1.45212	0.538156	7.77984e-05
FBXO33	0.797926	-0.325673	7.77984e-05
SEMA4G	0.455861	-1.13334	7.79847e-05
TMEM168	0.752528	-0.410183	7.83317e-05
2022-03-03	0.58275	-0.779051	7.83317e-05
TMEM176B	2.1897	1.13073	7.83317e-05
IHH	0.330944	-1.59534	7.86409e-05
PLAUR	1.63627	0.710411	7.91917e-05
AGR3	0.17428	-2.52052	8.0148e-05
TFCP2L1	0.431782	-1.21163	8.03032e-05
SHANK1	0.504852	-0.986069	8.10481e-05
ATP6V1E1	1.22252	0.289853	8.20567e-05
KRT40	0.513053	-0.962821	8.22481e-05
TCF12	0.712512	-0.489013	8.32999e-05
MTMR3	0.760252	-0.39545	8.40692e-05
IL21	1.19215	0.253571	8.60487e-05
LOC100130987	0.648174	-0.625548	8.66608e-05
TBX10	0.523825	-0.932843	8.98159e-05
ITGA10	0.544776	-0.876265	8.98159e-05
FBXO39	2.12337	1.08636	9.01234e-05
C2orf67	0.708478	-0.497206	9.13162e-05
UBR2	1.30208	0.380823	9.25902e-05
PPP1R9A	0.250064	-1.99963	9.2605e-05
CDK9	1.23395	0.303289	9.26267e-05
PDE11A	0.437982	-1.19106	9.327e-05
IL28B	1.38413	0.46898	9.52358e-05
KAZALD1	0.47251	-1.08158	9.58588e-05
MS4A1	3.05171	1.60962	9.74024e-05
NPM2	0.475389	-1.07282	9.8361e-05
PTPRO	2.02466	1.01768	9.8361e-05
KCNH8	0.425378	-1.23318	9.84721e-05
FAM179A	1.95819	0.96952	9.85211e-05
DSC3	6.99324	2.80596	9.88568e-05
PPP1CB	0.789234	-0.341475	9.90074e-05
SNHG10	0.733339	-0.447447	9.90074e-05
KIAA0368	1.1993	0.262194	9.91726e-05
MAGEF1	0.698739	-0.517175	9.95073e-05
FAM134B	0.481358	-1.05482	9.97709e-05
CEBPD	1.57162	0.652257	0.000101135
DLGAP4	0.787111	-0.345361	0.000101619
MYO9A	0.595687	-0.747374	0.000101699
UBTD2	0.797532	-0.326385	0.000102486
CAMKK1	0.622028	-0.684949	0.000102676
PNRC1	1.30209	0.380824	0.000103123
INSL3	1.63304	0.707558	0.000103352
OPHN1	0.664478	-0.589707	0.000103369
POF1B	0.243607	-2.03737	0.00010359
MAP4K2	0.751429	-0.412292	0.000103858
GJB5	2.83578	1.50374	0.000103992
HPS6	1.25852	0.331731	0.000104431
SOX18	1.80377	0.851017	0.000105144
C14orf109	0.743384	-0.427821	0.000105365
CPVL	2.04233	1.03022	0.000105582
HCLS1	1.89042	0.918709	0.000105747
XRCC2	0.684788	-0.546271	0.000106229
MLLT4	0.718886	-0.476165	0.000106234
DNAI1	0.430791	-1.21494	0.000106419
SERINC5	0.455748	-1.13369	0.000106737
GRM1	0.730493	-0.453057	0.000107631
CHDH	0.50449	-0.987102	0.000107787
C12orf53	0.475174	-1.07347	0.000108292
RNASE4	0.532928	-0.907988	0.000108954
C8orf37	0.67192	-0.573639	0.000108954
ZHX3	0.74538	-0.423951	0.000109901
FAM3C	0.706834	-0.500557	0.000109901
C20orf108	0.723347	-0.467239	0.000110071
ARMC3	0.285621	-1.80783	0.000110521
TSPAN8	0.171077	-2.54728	0.000110521
NQO2	1.49299	0.5782	0.000111091
PSMB4	1.26045	0.333937	0.000111271
SEMA3D	0.361151	-1.46933	0.000111425
LOC100128640	0.632565	-0.660715	0.000111555
SYBU	0.39839	-1.32775	0.000112531
SEMA3E	0.320586	-1.64122	0.000112659
MYCN	0.344864	-1.5359	0.000113099
PIGM	0.762861	-0.390508	0.000113427
KLHL32	0.549735	-0.863191	0.0001137
SLC6A9	1.59535	0.673871	0.000115297
TOX	2.00784	1.00564	0.000115777
ZNF620	0.606754	-0.720817	0.000115884
APOBEC1	0.526294	-0.92606	0.000116343
PTGDR	1.71792	0.780661	0.000117234
KIAA0125	2.55027	1.35065	0.000117276
ZNF860	0.570089	-0.81074	0.000117324
CDKN2A	2.10958	1.07695	0.000117753
GDPD1	0.563848	-0.826621	0.000118105
PDXDC1	0.717457	-0.479035	0.000118572
MAF	1.99556	0.996793	0.000118572
FBXO21	0.777139	-0.363756	0.000118885
KRT23	0.288545	-1.79313	0.000118951
PCYT1B	0.374298	-1.41774	0.000119218
CATSPER1	1.82579	0.868518	0.000119218
TRIM17	2.90573	1.5389	0.000119288
NF2	0.801732	-0.318808	0.0001197
CFTR	0.275448	-1.86015	0.000120387
TUBGCP4	0.742586	-0.429371	0.000120836
YSK4	0.452458	-1.14415	0.000120975
TRIM6	2.05371	1.03823	0.000121159
ETNK1	0.706286	-0.501676	0.000121505
KIAA1804	0.678201	-0.560215	0.000121828
PCDHAC1	0.381581	-1.38994	0.000122208
AKAP12	0.419504	-1.25324	0.000122334
RAB6B	0.498912	-1.00314	0.000122342
COX11	0.793529	-0.333645	0.000123926
CACNG4	0.266103	-1.90994	0.000123938
MTA3	0.800423	-0.321165	0.000124512
FCRL1	1.78687	0.837438	0.000125748
KIAA1919	0.727558	-0.458865	0.000125837
MNX1	0.416258	-1.26445	0.00012663
ALDH6A1	0.627321	-0.672724	0.00012663
SLC5A1	0.269228	-1.8931	0.000127274
ZNF276	1.33161	0.413176	0.000127357
PTPLAD2	1.83189	0.873334	0.000127379
ZNF514	0.690161	-0.534994	0.000127413
ARRDC5	1.60281	0.680606	0.000127496
FGFRL1	0.592691	-0.754648	0.000127496
ZNF671	1.7229	0.784837	0.000127496
RAB39B	1.91217	0.935208	0.000127496
ABI2	0.729195	-0.455624	0.000127496
ATG2B	0.74836	-0.418195	0.000127634
C11orf71	0.691209	-0.532805	0.000128024
POU2F2	1.74083	0.799772	0.000128694
PIK3C2A	0.712888	-0.488253	0.000129036
PALM2	0.522257	-0.93717	0.000129036
C1orf133	0.484972	-1.04403	0.000129227
RTN3	0.800061	-0.321819	0.000130036
ZDHHC8P1	0.453051	-1.14225	0.000130036
SERPINA4	0.327178	-1.61185	0.000130074
SSTR3	1.45084	0.536885	0.000130078
C1orf85	1.30185	0.380561	0.000131257
RXFP4	0.609358	-0.714639	0.000131789
GRIK3	0.464108	-1.10747	0.000131789
PLA2G6	0.676767	-0.563269	0.000131951
CXXC4	0.611537	-0.709488	0.000133615
FOXN4	0.375546	-1.41294	0.000133732
OTOP1	0.674957	-0.567132	0.000135162
SPATA6	0.415036	-1.26869	0.000135446
MGLL	0.549135	-0.864766	0.000135998
C2orf34	0.682991	-0.550061	0.00013684
C20orf85	0.384609	-1.37854	0.000137021
PXT1	1.40255	0.488049	0.000137056
GPC4	0.356722	-1.48713	0.000137104
WBSCR27	0.452037	-1.14549	0.000137196
MYCNOS	0.64191	-0.639556	0.000137953
ZBED2	2.42795	1.27974	0.00013852
HECTD1	0.755087	-0.405285	0.00013959
CRYZ	0.660858	-0.597587	0.000140668
STXBP6	0.277242	-1.85078	0.000142633
C20orf56	0.364714	-1.45516	0.000142854
ABHD2	0.640229	-0.64334	0.000143284
TMEM59L	0.456425	-1.13155	0.000146616
GPR173	0.486815	-1.03856	0.000147233
RASSF1	1.29438	0.37226	0.000147944
ENPP3	0.345297	-1.53409	0.000148444
ABCA4	0.374073	-1.41861	0.000148444
FZD3	0.472651	-1.08115	0.000149794
TNFSF12	1.51847	0.602616	0.000150047
TMEM155	1.88451	0.914191	0.000150137
OSM	1.82084	0.864607	0.000150297
PROX2	1.51672	0.600959	0.000150376
PARD6B	0.65572	-0.608849	0.000152319
METTL2B	0.777535	-0.36302	0.000152331
CAMK4	2.02136	1.01533	0.000153234
C14orf50	0.449949	-1.15217	0.00015364
SECISBP2L	0.712554	-0.488929	0.000154159
TTC21B	0.754513	-0.406382	0.000156145
BRWD3	0.613589	-0.704656	0.000156685
FAM60A	0.725972	-0.462014	0.000157148
C7orf40	1.4204	0.506292	0.000158172
ZKSCAN1	0.655524	-0.609279	0.000158289
FAM38A	1.45265	0.538686	0.000158495
PALM3	0.32514	-1.62087	0.000159212
PYGB	0.687879	-0.539774	0.000159972
KLRG1	1.66905	0.739026	0.000160034
TBCC	1.23043	0.299163	0.000160332
LRRIQ1	0.359441	-1.47617	0.000160737
BCAS1	0.307323	-1.70217	0.000160914
SMCR5	0.73835	-0.437624	0.000161095
SLC35D3	0.506123	-0.982439	0.000162438
HIST1H2BE	1.66172	0.732674	0.000163042
EFHC1	0.629782	-0.667076	0.0001634
C4A	2.28385	1.19147	0.000163987
RUNDC1	0.812085	-0.300298	0.00016471
FBN3	0.288467	-1.79352	0.000165399
SMAD5	0.777775	-0.362575	0.000165589
EFNA2	0.528235	-0.920747	0.000165885
KIAA1984	0.595327	-0.748246	0.000166055
WIF1	0.337886	-1.56539	0.0001662
PCDHA10	0.408656	-1.29104	0.000166371
SMTNL2	0.389815	-1.35914	0.000167051
LYPD3	3.00837	1.58898	0.000167529
MEX3A	0.494988	-1.01453	0.000167529
TRIM29	2.5158	1.33102	0.000168046
FAM3D	0.247125	-2.01669	0.000168661
2022-09-05	0.47943	-1.06061	0.000168661
PCDH19	0.289632	-1.7877	0.000168661
TP63	5.64166	2.49612	0.000169082
PNN	0.801317	-0.319555	0.000169361
KIF21A	0.673415	-0.570433	0.000169562
LONRF2	0.314433	-1.66917	0.000169741
SLC8A1	1.84488	0.883531	0.000170454
UBC	1.25494	0.327616	0.000171119
FBXW5	1.312	0.39177	0.000171841
HMOX1	1.51964	0.603734	0.000171916
ADNP	0.760605	-0.394781	0.000171916
SLC5A9	0.498039	-1.00567	0.00017252
HRC	0.606832	-0.720631	0.000172583
PRKCE	0.712001	-0.490049	0.000173335
ZNF84	0.763596	-0.389118	0.000173827
ASAP2	0.692471	-0.530175	0.000173885
EFR3B	0.480836	-1.05638	0.000173955
ENTPD1	1.29946	0.377912	0.000174025
DSG3	7.62803	2.93131	0.000174724
NUPR1	1.95787	0.969286	0.000174914
IDO2	1.90979	0.933413	0.000174914
SVOPL	0.367804	-1.44299	0.000174928
NGEF	0.41508	-1.26854	0.000176997
NR2F1	0.459056	-1.12326	0.000177201
SLC1A7	0.52832	-0.920516	0.000177929
TMEM40	3.53446	1.82149	0.000177929
C9orf89	1.36325	0.44705	0.000178812
HEY1	0.459739	-1.12111	0.000179231
GPR141	1.82248	0.865901	0.000179248
LOC730101	0.494963	-1.01461	0.00017976
PION	1.53978	0.62272	0.000179783
SOCS6	0.719622	-0.474689	0.000179948
DYNC1I1	0.35304	-1.5021	0.000180194
VKORC1L1	0.8081	-0.307394	0.000180404
LRRC8B	0.721677	-0.470575	0.000180409
RAB37	1.73363	0.7938	0.000181758
LRRC16A	0.662625	-0.593736	0.000182229
EXD2	0.77144	-0.374375	0.000183654
DIRAS2	0.401904	-1.31508	0.000185083
TSPAN4	1.68536	0.753054	0.000185304
ROPN1B	0.410426	-1.28481	0.000185304
CA5B	0.722508	-0.468914	0.000185304
C5orf39	1.7244	0.786095	0.000185304
TXNDC3	1.75657	0.812765	0.000185308
DGKE	0.711205	-0.491663	0.000186691
PTGS1	2.21069	1.14449	0.000192466
VTN	2.43093	1.28151	0.000193868
RASGRP2	1.85718	0.893115	0.000194806
LRP5	0.692954	-0.529168	0.000195078
CLTB	1.56164	0.643063	0.00019537
PPYR1	2.18531	1.12784	0.000195372
IFNK	1.91372	0.936378	0.000195887
MMAA	1.37398	0.458359	0.000195957
MED15	1.22597	0.293924	0.000197365
CACNB4	0.526883	-0.924446	0.000199366
LGR4	0.549801	-0.86302	0.000200963
KIAA2022	0.278487	-1.84432	0.00020102
FPR2	1.95203	0.964979	0.000202512
ZNF660	0.625842	-0.676129	0.000203506
DLG3	0.734082	-0.445987	0.000204287
BMF	0.601693	-0.732901	0.000204353
INPP5J	0.566199	-0.820619	0.000204353
PFAS	0.720412	-0.473105	0.000204779
NOV	0.446426	-1.16351	0.000205161
RALA	1.22489	0.292653	0.000205161
LRMP	2.2947	1.1983	0.000206147
OTP	0.616394	-0.698075	0.000206666
SLC26A7	0.430836	-1.21479	0.000207359
HSPC159	0.659355	-0.600872	0.000209545
BMPR1B	0.31177	-1.68145	0.000209644
AQP5	0.164699	-2.60209	0.000209944
PPP1R3F	1.52877	0.612369	0.000210765
TNRC6B	0.770828	-0.37552	0.000210957
LOC400927	0.6437	-0.635539	0.000211042
ARHGEF12	0.749629	-0.415751	0.000211403
EPB41L3	1.73085	0.791484	0.000214659
XKR6	1.92736	0.946628	0.000214759
SLC16A9	0.330485	-1.59734	0.000214759
SORBS1	0.553948	-0.852178	0.000214991
RAI1	0.716054	-0.48186	0.000214991
HTR7	2.71883	1.44299	0.000215927
ACTB	1.24941	0.321242	0.000216623
PRSS35	0.54457	-0.876811	0.000216623
NT5DC2	0.693355	-0.528333	0.000216736
ANKRD45	0.420557	-1.24963	0.000216849
HIF3A	0.399724	-1.32292	0.000217619
C10orf116	2.33269	1.222	0.00021846
CCDC129	0.471462	-1.08479	0.000218895
CHGA	0.316727	-1.65869	0.000220671
CXorf22	0.561809	-0.831847	0.000222971
C14orf128	0.66688	-0.5845	0.000222971
FKBPL	1.31166	0.391397	0.000223551
THNSL1	0.720876	-0.472177	0.00022406
CPA4	3.84276	1.94214	0.000226312
NACAD	0.526694	-0.924962	0.000226511
AGPAT5	0.75378	-0.407784	0.000226595
GPR120	1.81668	0.861306	0.00022769
KRT6C	6.14866	2.62027	0.000228425
TRIM24	0.69789	-0.518928	0.000228604
RHCG	6.47984	2.69596	0.000228677
ACAD8	0.753313	-0.408679	0.000228746
TAGLN2	1.34333	0.425812	0.000228746
ASS1	2.14776	1.10283	0.000228927
FGF18	0.424339	-1.23671	0.000229009
KCTD16	0.639733	-0.644457	0.000229146
PAPOLA	0.833459	-0.262817	0.00022934
PPP1R2P1	1.38553	0.470436	0.000229526
IFNGR1	1.3653	0.449218	0.000229909
APOC4	1.41374	0.499521	0.000231413
RAB3B	0.451511	-1.14717	0.000232063
HABP2	0.327533	-1.61029	0.000233093
SV2C	0.653635	-0.613443	0.000234046
NMUR2	0.470328	-1.08826	0.000234046
ZBBX	0.391827	-1.35171	0.000234731
GPR115	3.18082	1.6694	0.000234731
CARD9	1.88937	0.917909	0.000237205
EPHA7	0.397072	-1.33253	0.000237975
SMO	0.471205	-1.08557	0.000238471
FOXJ3	0.822856	-0.281288	0.000239401
GPR160	0.493507	-1.01886	0.000241086
LRRTM1	0.398054	-1.32897	0.000243581
MYO6	0.696982	-0.520806	0.000244198
MRPL28	1.31116	0.390844	0.000244304
MAP4K5	0.789206	-0.341526	0.000244489
SGSM1	0.391126	-1.35429	0.000244671
C11orf9	0.349541	-1.51647	0.000245991
UBXN2B	0.764911	-0.386635	0.000246181
ERBB4	0.316397	-1.66019	0.000246392
SLC16A5	0.599625	-0.737867	0.00024671
GPR3	0.549043	-0.86501	0.000248024
AVEN	1.36472	0.448609	0.000248471
LOC92973	0.514111	-0.959847	0.000248471
RPS6KA4	1.31309	0.392968	0.000250523
CLEC18A	0.592438	-0.755265	0.000251067
STAU2	0.781747	-0.355226	0.000251395
C1orf192	0.402778	-1.31194	0.000251395
CELF3	0.631667	-0.662765	0.000251626
MAML3	0.625109	-0.67782	0.000251802
XYLB	0.631837	-0.662376	0.000251941
GALNT12	0.474776	-1.07468	0.000252691
MCART6	1.69812	0.763937	0.000253181
NFKB1	1.33278	0.414441	0.000253581
LRRC66	0.510296	-0.970592	0.000253593
C3	2.4192	1.27453	0.000253835
ERLIN2	0.760927	-0.39417	0.000255466
KCNH6	0.673636	-0.569959	0.000257287
ATP6V0A4	0.326065	-1.61677	0.000257912
IFT140	0.706802	-0.500622	0.000257957
RAB3D	0.684467	-0.546947	0.000259569
KIF16B	0.693239	-0.528576	0.0002603
TRAF3IP1	0.717593	-0.478762	0.000262777
STK19	1.25069	0.322725	0.000263115
C17orf57	0.607925	-0.718035	0.000264055
TUBAL3	0.527746	-0.922083	0.000264269
CDCP1	1.49434	0.579507	0.000264371
C19orf26	0.494398	-1.01625	0.000264692
LOC728640	0.788908	-0.34207	0.000264692
CA8	0.300181	-1.73609	0.000264757
MFSD9	0.750219	-0.414616	0.00026737
[truncated: 4,278 more rows]

## Sheet: CHOL
id	fc	log2fc	padj
TAP1	4.6983	2.23214	1.85028e-06
PSMB8	3.57477	1.83785	2.9355e-06
HLA-A	3.444	1.78409	7.1281e-05
PARP14	2.92878	1.5503	7.1281e-05
TAP2	3.11842	1.64081	7.1281e-05
HLA-H	2.9631	1.56711	9.48256e-05
NLRC5	5.33125	2.41447	0.00169983
BTN3A1	3.27822	1.71291	0.00225809
HLA-E	3.20809	1.68171	0.00236101
HLA-F	6.6104	2.72474	0.00245586
BTN3A3	4.90736	2.29495	0.0028323
PSMB9	6.38279	2.67419	0.00315548
KLHL7	0.622702	-0.683387	0.00392929
HLA-B	4.9141	2.29693	0.00552221
HCP5	4.16934	2.05982	0.00552221
ETV7	5.87958	2.55571	0.0116198
B2M	3.3412	1.74036	0.0116198
OAS3	3.34775	1.74319	0.0173806
FKBP11	2.23828	1.16239	0.0241434
HLA-G	6.83404	2.77274	0.0241434
PML	2.16531	1.11457	0.0257848
PARP9	2.49411	1.31852	0.0257848
TAPBPL	2.20264	1.13924	0.0474155

## Sheet: COAD
id	fc	log2fc	padj
TAP1	4.18185	2.06414	7.10815e-93
PSMB9	3.99333	1.99759	3.25464e-64
IRF1	2.95351	1.56243	6.1724e-50
HLA-E	2.27013	1.18277	4.97104e-47
TAP2	2.71264	1.4397	9.8672e-47
NLRC5	3.12792	1.64521	1.35489e-46
PSMB8	2.24772	1.16846	2.52794e-43
UBE2L6	3.18786	1.67259	1.94126e-42
STAT1	2.67366	1.41882	2.1027e-42
PARP9	2.40163	1.26401	4.04941e-41
BTN3A1	2.37989	1.25089	6.28316e-41
CXCL10	8.89682	3.15329	2.97823e-40
HLA-C	2.68532	1.4251	5.77587e-40
HLA-F	4.1155	2.04107	6.1037e-40
GBP1	3.558	1.83107	4.82674e-38
IDO1	11.0986	3.47231	2.25353e-37
RARRES3	5.26217	2.39566	2.54114e-37
GBP4	5.59465	2.48405	5.71445e-37
IFIT3	3.61358	1.85343	6.5554e-36
ETV7	3.69044	1.88379	1.27087e-35
CD74	3.7211	1.89573	2.58425e-35
CIITA	6.49578	2.6995	3.48227e-35
IFNG	4.85231	2.27867	7.06021e-35
GNLY	6.9908	2.80546	1.4723e-34
CXCL11	7.97481	2.99545	3.15579e-34
CCL5	4.70926	2.2355	4.63758e-34
UBD	6.75138	2.75518	5.05012e-34
CXCL9	8.39736	3.06994	2.46224e-33
LAG3	4.55786	2.18836	2.06275e-32
IL15RA	2.01189	1.00855	3.00534e-32
HLA-B	2.78895	1.47972	3.65384e-32
HLA-DRA	4.35529	2.12277	3.65384e-32
WARS	2.63055	1.39536	4.63318e-32
HLA-DMA	3.41434	1.77161	4.6501e-32
TYMP	3.70586	1.88981	2.13764e-31
NKG7	4.97467	2.3146	3.12678e-31
HLA-DMB	3.99274	1.99738	3.12678e-31
BTN3A3	2.46031	1.29884	3.35697e-31
PARP14	2.11354	1.07966	3.51213e-31
BATF2	2.70282	1.43446	1.00362e-30
GBP5	5.9968	2.58419	1.08488e-30
CTSW	5.92296	2.56632	1.9662e-30
CD274	3.95289	1.98291	4.27041e-30
LOC400759	4.12807	2.04547	7.01884e-30
SOCS1	3.09439	1.62966	1.05692e-29
AIM2	7.60542	2.92703	1.05692e-29
CD8A	4.7273	2.24102	6.8822e-29
IRF9	2.00735	1.00529	7.88476e-29
C5orf56	2.11169	1.0784	1.9405e-28
GZMH	4.98901	2.31875	4.27483e-28
GZMA	4.66548	2.22203	1.22495e-27
IL2RB	3.60185	1.84874	1.48827e-27
HLA-DPA1	4.04256	2.01527	2.72998e-27
HLA-DRB1	4.19706	2.06938	2.90581e-27
OAS2	3.89919	1.96317	3.34547e-27
APOL2	2.36191	1.23996	3.61451e-27
HCP5	3.01361	1.59149	4.19416e-27
PRF1	4.07733	2.02762	4.96236e-27
CCL4	3.84491	1.94295	6.86967e-27
PDCD1	4.0276	2.00992	9.99627e-27
KIR2DL4	3.79295	1.92332	2.95842e-26
IL12RB1	3.64508	1.86595	3.48315e-26
ZNF683	6.00998	2.58736	4.3673e-26
BTN3A2	1.91827	0.939809	4.85924e-26
APOL3	3.05506	1.6112	5.50582e-26
FAM26F	3.94722	1.98084	1.46489e-25
PARP12	1.84831	0.886208	1.83186e-25
CXCR2P1	4.58375	2.19653	1.96051e-25
ICAM1	2.49675	1.32005	2.19844e-25
LAP3	1.77452	0.827428	2.70357e-25
CMPK2	2.94076	1.55619	4.25578e-25
BST2	4.29693	2.10331	4.53904e-25
TIGIT	3.93667	1.97698	6.02485e-25
TNFSF13B	3.64932	1.86763	8.64266e-25
FASLG	3.72905	1.89881	9.24971e-25
MMP25	2.98393	1.57721	1.02054e-24
SLC15A3	2.61783	1.38837	1.24426e-24
HLA-DPB1	3.38662	1.75985	1.55429e-24
IFI30	2.59822	1.37752	1.55429e-24
SLA2	3.09359	1.62928	2.66173e-24
TBX21	3.49613	1.80576	3.57942e-24
TNFRSF18	3.19362	1.67519	3.75647e-24
SAMD9L	3.05287	1.61017	5.06983e-24
APOL6	1.94258	0.957974	6.26634e-24
PSMB10	1.96576	0.975088	6.26634e-24
HCST	3.09499	1.62993	9.5021e-24
XAF1	2.83732	1.50453	1.00892e-23
APOL1	3.08036	1.6231	1.35784e-23
OAS3	2.25238	1.17145	1.4503e-23
MX1	3.34546	1.7422	1.86777e-23
HAPLN3	2.98835	1.57935	3.50877e-23
KLHDC7B	3.22003	1.68707	4.435e-23
CXCL13	7.39758	2.88705	4.435e-23
KLRD1	4.42072	2.14428	4.908e-23
SIRPG	3.60593	1.85037	5.83729e-23
USP18	2.48884	1.31547	7.50475e-23
CD7	3.87364	1.95369	9.56394e-23
HLA-H	2.373	1.24671	9.56394e-23
CXCR6	3.42972	1.77809	9.60335e-23
ODF3B	2.92465	1.54827	1.06491e-22
HLA-DRB5	4.62175	2.20844	1.32891e-22
ISG15	2.88294	1.52754	4.49855e-22
DOK2	2.87056	1.52133	4.70575e-22
PSME2	1.76703	0.821328	5.4346e-22
TAPBP	1.71701	0.7799	6.55819e-22
KLRK1	3.3347	1.73756	6.55819e-22
CD3D	3.1847	1.67116	6.75813e-22
FAM115C	2.33398	1.2228	7.06545e-22
JAKMIP1	3.37218	1.75368	1.40465e-21
FBXO6	2.22014	1.15065	1.65518e-21
IFIT2	2.62967	1.39488	2.11569e-21
CRTAM	3.74105	1.90345	2.28656e-21
CD247	2.91028	1.54116	3.80507e-21
PIK3AP1	2.70755	1.43699	3.99888e-21
IL2RA	3.68092	1.88007	5.21641e-21
PSME1	1.63256	0.707139	5.2292e-21
HLA-A	2.16994	1.11765	5.42636e-21
IL4I1	2.79342	1.48203	5.89817e-21
CD3G	3.57935	1.8397	9.48988e-21
CD3E	3.0946	1.62975	1.27683e-20
BAK1	1.67625	0.74524	1.27683e-20
DDX60	2.36625	1.2426	1.40603e-20
SH2D1A	3.45474	1.78858	1.52435e-20
IL21R	3.34288	1.74109	1.65827e-20
CD2	3.17055	1.66473	1.66451e-20
MYO1G	2.78897	1.47973	2.24214e-20
UBASH3A	3.01926	1.5942	2.83548e-20
IFI35	1.74471	0.802991	2.83548e-20
CCR5	2.92054	1.54624	3.11233e-20
IFIT5	1.91044	0.933907	3.33373e-20
C1QA	3.0343	1.60136	3.53246e-20
PTPRCAP	2.97502	1.5729	4.12947e-20
ITGAL	3.18049	1.66925	4.52921e-20
TBC1D10C	2.98373	1.57712	4.7715e-20
SECTM1	3.5929	1.84515	5.60495e-20
TNFRSF9	2.94804	1.55976	6.83098e-20
GBP2	2.24871	1.1691	7.00827e-20
RTP4	2.29874	1.20084	9.52024e-20
ARHGAP9	2.74727	1.458	9.6741e-20
STX11	2.76294	1.4662	1.12149e-19
EPSTI1	2.53656	1.34287	1.14524e-19
ZBED2	3.86965	1.9522	1.46602e-19
APOL4	2.80321	1.48708	1.49818e-19
IL18RAP	2.98082	1.57571	1.5266e-19
C1QB	3.34105	1.7403	1.59728e-19
LOC154761	2.29066	1.19576	2.20073e-19
DTX3L	1.53268	0.616052	2.29907e-19
CD300LF	2.99525	1.58268	2.67494e-19
HAVCR2	2.91051	1.54127	3.15887e-19
RSAD2	3.4301	1.77825	3.15887e-19
CD300A	2.67804	1.42118	3.15887e-19
ICOS	3.00434	1.58705	3.74923e-19
NCF1	3.39718	1.76434	3.76036e-19
TARP	2.69616	1.43091	4.08563e-19
IFI44L	4.22492	2.07893	4.91303e-19
SERPINB9	1.89784	0.924355	5.74202e-19
C1QC	3.03854	1.60338	6.38492e-19
SLAMF8	2.88175	1.52694	7.53017e-19
DDX58	1.87394	0.906075	7.53017e-19
IL18BP	1.90165	0.927251	7.57164e-19
GPR171	3.09493	1.62991	7.84668e-19
FREM2	0.108467	-3.20467	8.52312e-19
APOBEC3G	2.74059	1.45449	9.50681e-19
GZMM	2.9916	1.58092	9.84804e-19
RNF19B	1.6089	0.686072	1.03195e-18
ISG20	2.21263	1.14576	1.10715e-18
B2M	1.90139	0.927053	1.22286e-18
KLRC1	2.76618	1.46789	1.28892e-18
HLA-DOA	3.51445	1.8133	1.32701e-18
HLA-DRB6	4.32358	2.11223	1.39935e-18
CASP1	2.83815	1.50495	1.45142e-18
HK3	3.7374	1.90203	1.88363e-18
CD96	3.17783	1.66804	2.3163e-18
CD80	2.76414	1.46683	3.02122e-18
IL9R	2.39474	1.25987	3.17644e-18
LILRB4	3.68742	1.88261	3.21996e-18
CCRL1	3.25258	1.70158	3.48582e-18
FCGR3A	3.76244	1.91167	3.63241e-18
LILRB2	3.17194	1.66536	4.06994e-18
APOBEC3H	2.47371	1.30668	4.8608e-18
C19orf38	2.8088	1.48996	5.04545e-18
SLAMF7	3.70843	1.89081	5.36461e-18
JAK2	2.03191	1.02284	5.8625e-18
CCL8	4.48194	2.16412	1.04897e-17
ACAP1	2.95797	1.56461	1.10709e-17
CCL4L2	3.19187	1.6744	1.18533e-17
SIGLEC1	3.48413	1.8008	1.34951e-17
MYO1F	2.19673	1.13536	1.71315e-17
CYTH4	2.48533	1.31343	1.82186e-17
LILRP2	1.95032	0.963709	1.87826e-17
MEFV	2.83297	1.50232	2.1274e-17
LILRB3	2.92877	1.5503	2.18626e-17
TMEM149	1.91283	0.935711	2.33797e-17
CCL3	3.26609	1.70756	2.57116e-17
NCF1C	3.15265	1.65657	2.66027e-17
NCR1	1.9293	0.94808	3.92483e-17
ABI3	2.04248	1.03032	4.32692e-17
SASH3	2.61555	1.38711	4.70262e-17
TLR8	3.76898	1.91417	4.76261e-17
IL15	2.23825	1.16237	5.04635e-17
LOC400696	3.32619	1.73387	5.5186e-17
WAS	2.46649	1.30246	7.3633e-17
SP110	1.6455	0.718527	8.05625e-17
LCP2	2.54725	1.34894	1.55271e-16
MICB	2.3586	1.23793	1.62531e-16
PDCD1LG2	3.32151	1.73184	1.64576e-16
GPR25	2.46511	1.30165	1.67482e-16
SAMHD1	1.98233	0.987198	1.69641e-16
RHOH	2.62601	1.39287	1.69641e-16
NCF2	2.83177	1.5017	1.69641e-16
TYROBP	2.66602	1.41469	1.69641e-16
FAM78A	2.13333	1.09311	1.71069e-16
SP140	2.54219	1.34607	1.90408e-16
HLA-DQA1	3.44888	1.78613	1.97701e-16
RELT	1.65436	0.726276	2.04273e-16
SPI1	2.56964	1.36157	2.1293e-16
CD53	2.68353	1.42413	2.16253e-16
IFI6	2.89003	1.53109	2.39044e-16
FCER1G	2.56471	1.35879	2.56954e-16
RASAL3	2.36417	1.24134	3.08861e-16
CASP10	1.64942	0.721959	3.09288e-16
PLEK	3.25788	1.70394	3.30063e-16
LTA	2.38768	1.25561	3.34389e-16
CLEC4E	3.76169	1.91138	3.35051e-16
MAP4K1	3.00402	1.58689	4.40015e-16
IL32	1.8861	0.915407	4.5524e-16
NCF1B	2.68162	1.4231	4.8051e-16
FGD2	2.31282	1.20966	4.9592e-16
C18orf8	1.4049	0.490468	5.46515e-16
CARD16	1.99371	0.995453	5.92492e-16
HLA-G	2.72749	1.44758	6.32871e-16
BIRC3	2.37871	1.25018	6.34344e-16
SLA	2.46653	1.30248	6.83046e-16
SIGLEC10	2.72932	1.44854	7.2182e-16
CD86	2.76758	1.46862	7.29496e-16
CCDC109B	2.06114	1.04345	7.42545e-16
HLA-DQB2	3.21015	1.68264	7.83966e-16
TRIM22	2.37964	1.25075	8.48676e-16
ARHGAP30	2.36954	1.24461	1.00261e-15
FCGR3B	4.22212	2.07797	1.14643e-15
IFI44	2.58996	1.37293	1.23599e-15
FCRL6	2.54967	1.35031	1.29508e-15
LAPTM5	2.40943	1.26869	1.31559e-15
SAMSN1	2.64217	1.40172	1.36383e-15
SLC31A2	1.79847	0.846767	1.445e-15
CTLA4	2.69441	1.42997	1.46619e-15
LILRB1	2.88975	1.53095	1.53794e-15
FCGR1A	3.02289	1.59593	1.56934e-15
ZBTB32	2.10888	1.07648	1.8203e-15
PML	1.67857	0.747236	1.91664e-15
CCL18	5.8904	2.55837	2.0751e-15
CD244	2.8562	1.5141	2.1529e-15
HCG26	2.3447	1.2294	2.15812e-15
HCK	2.52588	1.33679	2.19003e-15
HLA-DQB1	3.40079	1.76587	2.4722e-15
LST1	2.3971	1.26129	2.52466e-15
GZMK	3.87849	1.95549	2.57147e-15
OASL	2.41648	1.27291	2.70742e-15
C17orf87	2.76533	1.46745	3.04251e-15
LILRA6	3.19519	1.6759	3.06088e-15
IGSF6	2.69236	1.42887	3.0923e-15
NFAM1	2.20947	1.1437	3.24501e-15
FCGR1C	2.56668	1.3599	3.34855e-15
ITGB2	2.83303	1.50235	3.41129e-15
GIMAP5	2.20758	1.14247	3.48768e-15
CD48	2.74224	1.45536	3.49898e-15
TIFAB	2.5387	1.34409	3.66298e-15
TNFAIP2	2.30327	1.20368	3.98546e-15
MMP12	3.78482	1.92022	4.08442e-15
ZBP1	2.61386	1.38618	4.08442e-15
HLA-DPB2	2.33586	1.22396	4.08579e-15
VAMP5	2.02244	1.0161	4.11546e-15
RASGRP1	2.47943	1.31001	4.15122e-15
STAT4	2.27956	1.18875	4.26186e-15
FCGR1B	2.70926	1.4379	4.39282e-15
SLAMF1	2.59518	1.37584	4.59976e-15
CD84	3.12403	1.64341	4.65064e-15
TRAF3IP3	2.182	1.12565	5.00443e-15
ITGAE	1.5424	0.625173	5.04547e-15
FMNL1	2.13686	1.09549	5.63212e-15
HSD3B7	1.64171	0.715195	6.51585e-15
TRPV2	2.04281	1.03056	6.74837e-15
EOMES	3.05319	1.61032	6.76828e-15
CMKLR1	2.54809	1.34942	7.53908e-15
IFI27	2.3342	1.22293	7.84438e-15
CSF3R	3.25275	1.70166	8.3452e-15
PYHIN1	2.73341	1.4507	9.16511e-15
LRRC25	2.38091	1.25152	9.45156e-15
CD6	2.11144	1.07823	1.23636e-14
CD52	2.3024	1.20314	1.35598e-14
CD38	3.35738	1.74734	1.36408e-14
SIGLEC9	2.59336	1.37482	1.39079e-14
GNGT2	1.99065	0.993238	1.42587e-14
HLA-DOB	2.75275	1.46088	1.44504e-14
IL10RA	2.41613	1.2727	1.48553e-14
GPR125	0.721818	-0.470293	1.51365e-14
FAM179A	2.11019	1.07737	1.55839e-14
ASPHD2	2.20221	1.13895	1.59924e-14
SLC2A5	2.70807	1.43727	1.69799e-14
LILRA3	3.4496	1.78643	1.95792e-14
PLA2G2D	4.45865	2.15661	2.12556e-14
FPR3	2.78625	1.47832	2.2138e-14
UBASH3B	2.45358	1.29489	2.5043e-14
LILRA5	2.82095	1.49618	2.76516e-14
SELPLG	2.19728	1.13572	2.87485e-14
TNFAIP8L2	2.10475	1.07365	3.60186e-14
TRIM69	2.06055	1.04303	4.43853e-14
ITGB7	2.26756	1.18114	4.43853e-14
DNAJC5B	2.66429	1.41375	4.43853e-14
C1orf162	2.21258	1.14573	4.65957e-14
FOXP3	2.50572	1.32523	5.17781e-14
IFIH1	1.70846	0.772693	5.64664e-14
GBP7	1.82023	0.864119	5.99072e-14
CLEC12A	3.14102	1.65123	6.06369e-14
SDS	2.46834	1.30354	6.49531e-14
TRAT1	2.59182	1.37397	6.92269e-14
RAET1E	2.57192	1.36285	7.08691e-14
PTPRC	2.75959	1.46446	8.86073e-14
NCKAP1L	2.47093	1.30505	9.36199e-14
DOCK2	2.59834	1.37759	1.07024e-13
LAIR1	2.39903	1.26245	1.0893e-13
VNN2	3.61476	1.8539	1.20106e-13
THEMIS	2.70161	1.43382	1.29537e-13
CD226	2.44008	1.28693	1.29791e-13
P2RY10	2.74566	1.45715	1.30295e-13
IKZF1	2.51404	1.33001	1.30767e-13
S1PR4	2.40398	1.26543	1.34189e-13
LGMN	1.53193	0.615347	1.36708e-13
ITK	2.51111	1.32833	1.36708e-13
RNF213	1.70331	0.768342	1.38552e-13
SIGLEC7	2.59649	1.37656	1.41384e-13
HCLS1	2.08278	1.05851	1.47406e-13
LILRB5	2.94929	1.56037	1.57175e-13
LCP1	2.36753	1.24338	1.67053e-13
ZMYND15	2.1218	1.08529	1.99014e-13
TNFRSF8	2.25563	1.17353	2.02109e-13
BCL2A1	2.7025	1.4343	2.12218e-13
SRGN	2.41627	1.27278	2.14355e-13
CLEC7A	2.63575	1.39822	2.21774e-13
2022-09-01	2.02281	1.01636	2.23757e-13
ACP5	2.06236	1.0443	2.63887e-13
CD14	2.20318	1.13959	2.64715e-13
PIK3R5	2.32621	1.21798	2.73194e-13
NLRC3	1.89907	0.925296	2.96516e-13
LSP1	2.10379	1.07299	3.17117e-13
NUB1	1.30793	0.387289	3.69785e-13
PTAFR	2.7375	1.45286	3.77682e-13
SAMD9	2.19549	1.13454	3.91849e-13
MNDA	2.69344	1.42945	3.9486e-13
GMFG	1.83855	0.87857	4.58095e-13
FPR2	3.63418	1.86163	5.01825e-13
ADAR	1.33464	0.416451	5.09571e-13
GPR174	2.43069	1.28137	5.21072e-13
CD209	2.77926	1.4747	5.23674e-13
PTPN7	2.79126	1.48092	5.55187e-13
C19orf66	1.49741	0.582474	5.59358e-13
MS4A4A	2.75185	1.4604	5.75895e-13
RAB42	2.18711	1.12902	5.93589e-13
CD4	2.22754	1.15545	6.23505e-13
CD27	2.56091	1.35666	6.33037e-13
CD40	2.28574	1.19266	6.33037e-13
FGR	2.45837	1.2977	6.35349e-13
FAM20A	2.4649	1.30153	6.91855e-13
XCL2	2.23412	1.1597	7.11986e-13
STAT2	1.54707	0.629536	7.41431e-13
PSTPIP1	2.18285	1.12621	7.41444e-13
ITGAX	2.48743	1.31465	7.6071e-13
APOE	3.13354	1.6478	7.93716e-13
LIMD2	1.84629	0.88463	9.40551e-13
NOS2	3.76904	1.9142	1.11045e-12
CD37	2.41269	1.27064	1.19991e-12
LY9	2.61613	1.38744	1.26339e-12
SIGLEC14	2.86356	1.51781	1.38232e-12
ACVR2B	0.638769	-0.646633	1.5964e-12
RPS6KA6	0.246267	-2.02171	1.67294e-12
BATF3	1.97063	0.978653	1.79076e-12
DOK3	1.8604	0.89561	1.81994e-12
CYBB	2.52186	1.33449	2.01236e-12
SOD2	1.55218	0.634297	2.02221e-12
PLEKHF1	1.7665	0.820892	2.22098e-12
FYB	2.44932	1.29238	2.25008e-12
CD300C	2.12792	1.08945	2.39173e-12
GM2A	1.41715	0.502991	2.4232e-12
AIF1	2.08146	1.05759	2.49504e-12
FPR1	3.02483	1.59686	2.51544e-12
TRIM21	1.38668	0.471637	2.63169e-12
CD163	3.10815	1.63605	2.74354e-12
SPHK1	2.47814	1.30926	2.78013e-12
FLVCR2	1.99049	0.993125	2.87998e-12
GPR65	2.20552	1.14112	3.1199e-12
HLA-DQA2	3.12723	1.64488	3.67979e-12
PILRA	2.35057	1.23301	3.73562e-12
CSF1	1.89661	0.923423	3.88191e-12
APBB1IP	2.34803	1.23145	3.93224e-12
CEACAM4	2.20982	1.14393	4.87964e-12
C1orf38	1.87978	0.910561	4.90576e-12
TRAFD1	1.31178	0.391523	4.91167e-12
SAMD3	2.76521	1.46739	5.04171e-12
IFIT1	2.58457	1.36993	5.24932e-12
TFEC	2.57406	1.36404	6.25312e-12
MT2A	2.29816	1.20048	6.3833e-12
CD72	1.96356	0.973472	6.42402e-12
CCR1	2.19753	1.13588	6.50634e-12
SLFN12L	2.07382	1.05229	6.52197e-12
MS4A6A	2.42647	1.27886	6.79858e-12
CORO1A	1.84902	0.886757	7.07346e-12
CASS4	2.23293	1.15894	7.38952e-12
ZNF831	2.45391	1.29508	7.70554e-12
ARHGAP25	1.96018	0.97099	8.07498e-12
SIRPB2	2.31631	1.21183	8.07498e-12
C2orf18	1.27252	0.347689	8.23323e-12
COL9A1	0.246502	-2.02033	8.4964e-12
GBP6	2.04615	1.03291	8.58973e-12
PDE6G	2.00948	1.00682	8.60238e-12
TNFSF14	2.15409	1.10708	8.65417e-12
CSF2RB	2.40521	1.26616	9.21595e-12
BTN2A2	1.57909	0.659091	1.01159e-11
TAGAP	2.39187	1.25814	1.01159e-11
DLX3	0.216284	-2.209	1.03305e-11
SERPINA10	0.219039	-2.19074	1.04309e-11
ZNF704	0.480732	-1.05669	1.17283e-11
SCN8A	0.426074	-1.23082	1.26636e-11
PPP1R16B	2.16277	1.11288	1.44945e-11
TNFRSF4	1.96429	0.974008	1.45805e-11
GPR114	2.01594	1.01145	1.52193e-11
PLA2G7	2.24765	1.16842	1.57376e-11
KYNU	2.69277	1.42909	1.63588e-11
CD101	1.71656	0.779517	1.72192e-11
S100A8	3.01838	1.59378	1.78464e-11
C3AR1	2.40659	1.26699	1.8945e-11
TTC24	1.86088	0.895988	1.89567e-11
NCR3	2.11078	1.07778	1.92278e-11
TMEM140	1.49543	0.580563	2.02222e-11
PIK3CD	2.10037	1.07065	2.06728e-11
USP37	0.72744	-0.459099	2.06883e-11
KLHL6	2.29249	1.19692	2.19548e-11
C5orf20	2.35681	1.23683	2.28365e-11
EVI2B	2.24384	1.16597	2.35334e-11
CCL13	3.6093	1.85172	2.36234e-11
OSCAR	2.11925	1.08355	2.37018e-11
CNDP2	1.4304	0.516418	2.49202e-11
CYSLTR2	2.22153	1.15155	2.69496e-11
SUCNR1	2.45699	1.29689	2.69496e-11
CAPS	0.375423	-1.41341	2.69496e-11
PART1	0.301157	-1.73141	2.81629e-11
GFI1	2.53623	1.34268	2.8706e-11
LCK	2.29847	1.20067	2.94382e-11
NMI	1.51461	0.598949	2.9868e-11
SIGLEC5	2.56668	1.35991	3.12775e-11
GPR18	1.93804	0.954602	3.35707e-11
CLEC6A	1.97036	0.97846	3.37867e-11
SGPP2	1.81157	0.857242	3.41302e-11
USF1	1.31587	0.396018	3.59524e-11
IRF4	2.75906	1.46418	3.78224e-11
WNK4	0.417101	-1.26153	3.82869e-11
EVI2A	2.33412	1.22288	4.08453e-11
LGALS9	1.69804	0.763866	4.12563e-11
NFATC1	2.20391	1.14006	4.23841e-11
LYPD5	2.21238	1.1456	4.28881e-11
PARVG	2.06847	1.04857	4.36108e-11
GJD3	1.98049	0.985855	4.48594e-11
CD69	2.51542	1.3308	4.80412e-11
SPN	2.13309	1.09295	5.21925e-11
TRIM14	1.34735	0.430126	5.30005e-11
CLEC4D	1.96459	0.974225	5.30562e-11
MTSS1	0.511404	-0.967465	5.90603e-11
LILRA2	2.36875	1.24413	6.66919e-11
UMODL1	0.319449	-1.64634	7.46025e-11
FCRL3	2.58018	1.36747	7.47283e-11
CEP68	0.706288	-0.501672	8.18145e-11
JAK3	1.74202	0.800764	8.22745e-11
FCGR2A	2.15411	1.10709	8.80284e-11
LOC100233209	2.05629	1.04004	9.78077e-11
PLAUR	1.62511	0.700538	9.90214e-11
HERC6	1.72748	0.788668	1.01165e-10
CCRN4L	1.49857	0.583582	1.03119e-10
IFI16	2.02701	1.01935	1.04401e-10
IFITM3	1.65663	0.728249	1.09573e-10
GTF2IRD2P1	0.620527	-0.688434	1.1192e-10
SMTNL1	1.92006	0.941151	1.12002e-10
SNX10	1.75165	0.808715	1.16609e-10
IL1RN	2.62296	1.3912	1.24356e-10
KCNK13	2.05167	1.0368	1.25115e-10
ZAP70	2.39098	1.2576	1.27794e-10
GPR97	2.49232	1.31749	1.31596e-10
ACOX2	0.424782	-1.2352	1.35505e-10
TNFRSF6B	3.24437	1.69794	1.45725e-10
BTK	2.26123	1.17711	1.49351e-10
NFKBIE	1.34186	0.42423	1.52603e-10
SLC38A4	0.280588	-1.83347	1.54069e-10
P2RY6	1.93921	0.955472	1.57304e-10
MYEOV	2.88394	1.52804	1.75921e-10
CPN1	0.295856	-1.75703	1.75921e-10
GLT1D1	2.08948	1.06314	1.87491e-10
GPR84	2.23972	1.16332	1.99801e-10
GTF2IRD2	0.679922	-0.556559	2.002e-10
MS4A7	2.28074	1.1895	2.06083e-10
FCGR2C	2.50862	1.3269	2.21772e-10
SLC7A7	1.79766	0.846119	2.30983e-10
KIR3DL1	1.7947	0.843743	2.39916e-10
CBR3	1.9044	0.929334	2.77036e-10
IL18R1	1.94247	0.957895	2.83685e-10
MPEG1	2.28657	1.19319	2.85076e-10
PHYH	0.633503	-0.658577	2.98043e-10
SLC1A3	2.55971	1.35598	2.98174e-10
GTF2IRD2B	0.620339	-0.688871	3.35622e-10
KIR2DL3	1.79564	0.844499	3.36316e-10
HPSE	1.96789	0.976647	3.41319e-10
TNF	1.98904	0.99207	3.42658e-10
PRKCB	2.29149	1.19628	3.5545e-10
AGAP2	2.3909	1.25755	3.67053e-10
MEI1	2.08424	1.05952	3.67053e-10
ADPRHL2	1.28398	0.360624	3.67053e-10
CTSL2	0.479707	-1.05978	3.71158e-10
SH2D1B	2.08152	1.05764	3.73322e-10
CAMK1G	1.84469	0.883382	3.74834e-10
DPYD	2.34631	1.2304	3.76893e-10
CLEC4A	2.03216	1.02301	3.85115e-10
KIAA0748	2.1116	1.07833	3.93919e-10
ZNF774	0.638708	-0.646773	4.07475e-10
EMR2	1.76465	0.819379	4.08233e-10
KIR3DL2	1.85577	0.892019	4.1875e-10
SAA2	3.68992	1.88359	4.41253e-10
GPR109B	3.44731	1.78547	4.41253e-10
CSF1R	2.13414	1.09366	4.42963e-10
FCAR	2.32387	1.21653	5.09595e-10
NFKB2	1.47461	0.560338	5.23958e-10
ABCD2	2.09078	1.06404	5.28795e-10
TUG1	0.75962	-0.396651	5.33534e-10
PCP4	0.213362	-2.22862	5.36049e-10
CD200R1	2.03191	1.02284	5.58778e-10
REEP1	0.310425	-1.68769	5.58923e-10
C10orf54	1.56894	0.649787	5.85608e-10
APOC1	2.47345	1.30652	6.10499e-10
SP100	1.37445	0.458853	6.28286e-10
CDCP1	1.40521	0.490785	6.28432e-10
CCR2	2.53033	1.33933	6.28432e-10
CALR	1.26	0.333421	6.40065e-10
SORBS2	0.434475	-1.20266	6.42427e-10
LAMP3	1.88002	0.910751	6.53184e-10
PATL2	1.86238	0.897148	6.96418e-10
ZMYND8	0.636314	-0.652189	6.97555e-10
SNAI3	1.92952	0.948244	7.02987e-10
ANKH	0.659692	-0.600136	7.32869e-10
SLC25A28	1.31835	0.398729	7.36855e-10
LRRC36	0.372538	-1.42454	7.67241e-10
ADAMTS2	2.6106	1.38438	7.78212e-10
TRIM40	2.27287	1.18452	7.98384e-10
HSH2D	1.43625	0.522308	8.12771e-10
KMO	2.02417	1.01733	8.43393e-10
ZNF84	0.697082	-0.5206	8.45902e-10
GIMAP4	1.86252	0.897256	8.45902e-10
ZBTB10	0.523861	-0.932743	8.53187e-10
BATF	2.26939	1.1823	8.64105e-10
GIMAP1	1.85225	0.889282	8.64105e-10
EMILIN2	1.53204	0.615454	8.64521e-10
HRH2	2.13347	1.0932	8.91072e-10
NODAL	0.396017	-1.33637	9.3403e-10
ALOX15B	2.84123	1.50652	9.774e-10
MGAT1	1.28683	0.363818	9.80731e-10
AQP9	3.38323	1.7584	1.016e-09
GRIN3A	1.66746	0.737651	1.0565e-09
P2RY13	2.40862	1.26821	1.10888e-09
TNFRSF1B	1.52821	0.611846	1.11177e-09
CD68	1.602	0.679873	1.16323e-09
LY6G6D	0.126396	-2.98397	1.19275e-09
VMO1	2.03937	1.02813	1.19987e-09
CCR7	2.25717	1.17451	1.19987e-09
SLC38A3	0.314967	-1.66673	1.24093e-09
FAM168B	0.786252	-0.346936	1.2446e-09
MAX	1.25884	0.332094	1.2883e-09
C16orf54	2.31447	1.21068	1.29638e-09
MXD1	1.57203	0.652627	1.34542e-09
CYP4F22	1.73332	0.793535	1.34634e-09
XIRP1	2.41711	1.27328	1.38405e-09
MAFB	2.05337	1.03799	1.40707e-09
CEL	0.160746	-2.63714	1.40809e-09
SLC11A1	2.23081	1.15757	1.41923e-09
IL27	1.73338	0.793591	1.43641e-09
FGL2	2.20966	1.14383	1.44924e-09
ZC3H8	0.728634	-0.456734	1.47858e-09
GPR109A	3.25656	1.70335	1.51819e-09
LAX1	2.39348	1.25911	1.55351e-09
HAS2AS	0.403141	-1.31064	1.5773e-09
MRC1	2.67958	1.42201	1.618e-09
SYT7	0.455296	-1.13512	1.64214e-09
CCR8	2.06418	1.04557	1.6935e-09
LILRA4	1.94648	0.960867	1.69652e-09
ACOT7	1.39512	0.48039	1.71554e-09
CR1	2.77891	1.47452	1.75006e-09
SEPX1	1.45924	0.545214	1.7942e-09
MBTD1	0.72506	-0.463828	1.7942e-09
LTB	2.08618	1.06086	1.79693e-09
SOCS3	1.75587	0.812183	1.79693e-09
TTC17	0.778645	-0.360962	1.87009e-09
LOC253039	0.688473	-0.538529	1.957e-09
ANK1	2.27458	1.1856	1.97108e-09
CYTIP	2.01087	1.00782	2.00444e-09
LRP6	0.74858	-0.417771	2.07652e-09
NECAP2	1.25968	0.333061	2.24628e-09
IRF7	1.67293	0.742373	2.25293e-09
PGAM1	1.37436	0.458763	2.28348e-09
ITGAM	2.50819	1.32665	2.33243e-09
CST7	2.30471	1.20458	2.35487e-09
SAA1	3.66006	1.87187	2.37365e-09
PLEKHA5	0.745417	-0.423879	2.40381e-09
USP30	0.794007	-0.332776	2.41307e-09
C1orf144	1.2246	0.292308	2.4145e-09
FOLR1	0.240104	-2.05827	2.4383e-09
AGTRAP	1.41	0.4957	2.4383e-09
GIMAP6	1.86967	0.902783	2.67683e-09
GIMAP7	1.80176	0.849411	2.72176e-09
RASSF5	1.81446	0.859542	2.82576e-09
FCGR2B	2.61764	1.38827	2.82576e-09
SIGLEC8	2.27487	1.18578	2.85523e-09
MIR155HG	1.93939	0.955599	2.88848e-09
EBI3	2.11842	1.08299	2.9013e-09
SHROOM4	0.500191	-0.999449	2.91903e-09
ZNF80	1.93091	0.949277	2.9307e-09
MFSD7	1.93559	0.952771	2.93474e-09
GPSM2	0.649029	-0.623646	2.93474e-09
OSM	2.61548	1.38708	2.93862e-09
CLEC10A	2.61963	1.38936	2.96052e-09
PMAIP1	1.64966	0.722171	3.03691e-09
NAALADL2	0.448629	-1.15641	3.08036e-09
TTC25	0.546918	-0.870602	3.522e-09
CHD6	0.680226	-0.555914	3.61434e-09
TMEM63C	0.321044	-1.63916	3.72645e-09
CTSL1	1.74103	0.799941	3.80586e-09
IRF2BP2	0.78008	-0.358306	3.81633e-09
MEX3A	0.471894	-1.08347	3.94997e-09
CALM3	1.30443	0.383419	3.94997e-09
ZNRF3	0.621835	-0.685396	4.00772e-09
PFKP	1.55811	0.639799	4.00947e-09
PALM3	0.333647	-1.58361	4.04834e-09
ADAP2	1.63268	0.707239	4.24881e-09
TYW1	0.803785	-0.315119	4.47878e-09
HTRA4	1.98373	0.988219	4.48362e-09
EMR1	2.20044	1.13779	4.49832e-09
NTRK1	1.88925	0.917815	4.52253e-09
TNIP3	2.21869	1.14971	4.65066e-09
PLEKHO2	1.59325	0.671974	4.65121e-09
VSIG4	2.53293	1.34081	4.7808e-09
AXIN2	0.422522	-1.2429	4.85353e-09
TRIM24	0.737781	-0.438735	4.90361e-09
TNFSF10	1.55574	0.637603	4.92278e-09
NLK	0.786359	-0.346741	4.93269e-09
KRT86	2.17106	1.1184	4.93269e-09
ISM2	0.281222	-1.83022	4.95727e-09
SNTN	0.550698	-0.860666	5.04386e-09
RASGRP4	2.05013	1.03571	5.09635e-09
MAP3K8	1.52224	0.606196	5.27808e-09
CPNE5	1.84207	0.88133	5.51501e-09
C8orf80	2.28499	1.19219	5.54746e-09
GPR141	1.89345	0.921018	5.6453e-09
CFB	1.77999	0.831871	5.64921e-09
GSK3B	0.830123	-0.268602	5.80524e-09
LYZ	3.09233	1.62869	5.96827e-09
ZC3H12B	0.562557	-0.829928	6.04482e-09
DNASE2	1.25774	0.330837	6.13091e-09
RAB33A	1.70782	0.772159	6.16911e-09
WDFY4	2.24265	1.1652	6.28498e-09
PRAM1	2.08383	1.05924	6.36646e-09
ARNTL2	1.7135	0.776943	6.43754e-09
AMACR	0.54459	-0.876757	6.53252e-09
DRAM1	1.51144	0.595926	6.94447e-09
CBFA2T2	0.708	-0.49818	7.07927e-09
MMP1	3.15653	1.65834	7.07927e-09
KIAA1949	1.53144	0.614893	7.34389e-09
PDCD4	0.72593	-0.462098	7.54441e-09
TSGA10	0.661444	-0.596309	7.56993e-09
PTCRA	1.65381	0.725795	7.64905e-09
PAH	0.243625	-2.03727	7.77549e-09
EHD1	1.36921	0.453341	7.86257e-09
UBN2	0.749856	-0.415314	8.01141e-09
FAS	1.70385	0.7688	8.11851e-09
CHST11	1.89683	0.923589	8.64728e-09
COL2A1	0.317304	-1.65606	8.65966e-09
SYTL3	1.59044	0.669429	8.65966e-09
ADORA2A	1.66872	0.738741	8.86174e-09
CYLD	1.32356	0.404422	8.96633e-09
IMMP2L	0.654091	-0.612437	1.00857e-08
FLT3LG	1.61699	0.693313	1.02011e-08
MYRIP	0.386203	-1.37257	1.0382e-08
NLRC4	1.70668	0.771193	1.06297e-08
TMEM192	0.738271	-0.437778	1.06863e-08
PSMB2	1.23298	0.302148	1.07169e-08
CLEC2B	1.86046	0.895661	1.09885e-08
UPP1	1.50788	0.59252	1.10129e-08
EPB41L4B	0.665509	-0.587469	1.16214e-08
CXCR1	2.5538	1.35265	1.18565e-08
TMPRSS13	0.360608	-1.4715	1.18832e-08
GPNMB	2.34079	1.227	1.22605e-08
MOCOS	1.6244	0.699905	1.23097e-08
MS4A14	1.84359	0.882515	1.24685e-08
CTSB	1.45065	0.536704	1.24695e-08
RHOF	2.2774	1.18739	1.25041e-08
KIAA1147	0.731227	-0.451609	1.25568e-08
SATB2	0.502586	-0.992557	1.26496e-08
NUBP1	1.23777	0.307742	1.27598e-08
DAPK2	0.559678	-0.837331	1.30545e-08
SNX30	0.729382	-0.455253	1.30545e-08
TNFRSF14	1.4097	0.495385	1.31578e-08
NCBP2	0.762976	-0.39029	1.31968e-08
CGNL1	0.468315	-1.09445	1.32452e-08
GNG4	0.228104	-2.13224	1.32452e-08
CAB39L	0.450501	-1.1504	1.35565e-08
DRD2	0.261269	-1.93639	1.36481e-08
MYEF2	0.30574	-1.70962	1.3821e-08
ICAM3	1.38967	0.474746	1.41289e-08
TAPBPL	1.50856	0.59317	1.42233e-08
RARRES1	2.46041	1.2989	1.43188e-08
IYD	0.478056	-1.06475	1.45783e-08
CACNA1D	0.507128	-0.979577	1.56021e-08
HMOX1	1.64873	0.721353	1.58081e-08
ASPRV1	1.50336	0.588186	1.59457e-08
CCL22	2.17345	1.11999	1.59607e-08
RCSD1	1.74537	0.803532	1.60951e-08
ADORA3	1.87297	0.905331	1.61776e-08
ZNF248	0.780951	-0.356695	1.62725e-08
IRF8	1.85265	0.889588	1.63307e-08
APLF	0.566264	-0.820452	1.63897e-08
MARK1	0.388689	-1.36331	1.64542e-08
CDNF	0.604833	-0.725391	1.65732e-08
CD70	2.32217	1.21547	1.69479e-08
SELL	2.2486	1.16903	1.71105e-08
CD28	1.90509	0.929859	1.72449e-08
BTLA	1.90892	0.932755	1.74131e-08
MSR1	2.50756	1.32628	1.80551e-08
CYP2W1	0.197718	-2.33848	1.8173e-08
IL7	1.77778	0.83008	1.84049e-08
APOBEC3A	1.89887	0.925144	1.84122e-08
CPVL	2.13967	1.09739	1.88234e-08
LAT2	1.62951	0.70444	1.92982e-08
APOBEC3D	1.81316	0.858508	1.94714e-08
S100A9	2.16201	1.11237	1.96628e-08
LOC647979	0.713776	-0.486456	1.99765e-08
SMAP2	1.30015	0.378673	2.01511e-08
FFAR2	2.44694	1.29098	2.01511e-08
PLEKHO1	1.62988	0.704768	2.03129e-08
C2orf63	0.646521	-0.62923	2.04578e-08
SEC14L4	0.392641	-1.34872	2.11394e-08
C5orf39	1.63702	0.711075	2.11435e-08
BCL9	0.757074	-0.401494	2.15113e-08
GVIN1	1.94418	0.959161	2.2372e-08
PCMTD2	0.672383	-0.572644	2.2803e-08
ASS1	1.72599	0.787421	2.29015e-08
SFMBT2	2.00671	1.00483	2.29139e-08
DDX60L	1.57318	0.653681	2.40416e-08
DHX58	1.52675	0.61046	2.4298e-08
RGS18	2.03649	1.02608	2.44867e-08
AMMECR1L	0.842103	-0.247932	2.47029e-08
LOC96610	2.74315	1.45583	2.47201e-08
PLA2G2A	4.65743	2.21953	2.4861e-08
PRDM8	2.3485	1.23174	2.50075e-08
C19orf28	1.35802	0.441505	2.56699e-08
TGFBR2	0.67926	-0.557963	2.57172e-08
TFAP2A	2.9012	1.53665	2.57849e-08
ENPP3	0.229961	-2.12054	2.60026e-08
MUL1	1.21525	0.281254	2.62793e-08
HSD11B1	2.36376	1.24109	2.65836e-08
COTL1	1.50294	0.587786	2.67563e-08
ANKRD58	1.60189	0.679773	2.72575e-08
WWP1	0.742205	-0.43011	2.74541e-08
IKZF3	2.14023	1.09777	2.76111e-08
GSDMC	1.76024	0.815775	2.77974e-08
ARFGEF2	0.734665	-0.444842	2.83333e-08
TDGF1	0.302513	-1.72493	2.90688e-08
LILRA1	1.9138	0.93644	2.93059e-08
MUC1	2.43105	1.28158	2.93232e-08
S1PR2	1.43716	0.523219	2.94997e-08
SH3D19	0.742197	-0.430126	2.96538e-08
TREM2	2.43505	1.28395	3.03463e-08
SLC25A22	1.44648	0.532542	3.08145e-08
BAT5	1.26189	0.335581	3.29713e-08
GPATCH3	1.23871	0.308839	3.33453e-08
TCIRG1	1.48025	0.56584	3.37194e-08
CLGN	0.361386	-1.46839	3.39267e-08
CRB2	0.4468	-1.1623	3.41371e-08
SIGLEC12	2.45812	1.29755	3.45914e-08
POFUT1	0.641649	-0.640143	3.55277e-08
C2	1.81129	0.857017	3.60282e-08
IL16	1.65635	0.728012	3.75811e-08
ALOX5AP	1.91981	0.94096	3.77963e-08
AGXT	0.428258	-1.22345	3.79577e-08
DACH1	0.388991	-1.36219	3.82379e-08
HSPA7	1.94647	0.960859	3.83597e-08
HS3ST3B1	1.8148	0.859808	3.85492e-08
TREM1	2.68977	1.42748	3.91122e-08
IL10	1.94169	0.957315	3.92036e-08
PIK3R6	1.77545	0.828186	3.96742e-08
TNFSF8	2.02604	1.01867	4.01186e-08
F7	0.330536	-1.59712	4.10291e-08
PLAU	1.74455	0.802854	4.10291e-08
DAPP1	2.28297	1.19091	4.24499e-08
LOC606724	1.5802	0.660108	4.24499e-08
LOC153328	2.18812	1.12969	4.28219e-08
ISX	0.314982	-1.66666	4.30832e-08
ADAM15	1.35629	0.439667	4.33715e-08
ZNF577	0.547076	-0.870187	4.34984e-08
DKFZP586I1420	0.727005	-0.459963	4.38128e-08
CECR1	2.06909	1.049	4.42423e-08
SBNO2	1.40834	0.493992	4.42423e-08
DHRS12	0.675863	-0.565198	4.54583e-08
ADNP	0.772044	-0.373245	4.75845e-08
LOC285830	1.58744	0.666704	4.86435e-08
DOCK10	1.85363	0.89035	4.86435e-08
CES4	0.381935	-1.3886	4.95006e-08
KIAA0182	0.739493	-0.435392	5.03076e-08
CTSD	1.42859	0.514589	5.07077e-08
ENO1	1.35198	0.435078	5.08929e-08
UBR5	0.745715	-0.423304	5.24915e-08
C9orf139	1.72128	0.783481	5.37377e-08
KCNA3	2.1273	1.08902	5.40773e-08
RGS14	1.47335	0.559097	5.40773e-08
FAM110C	1.54877	0.631121	5.41457e-08
PTPN22	1.79315	0.842498	5.41457e-08
LRRC2	0.405275	-1.30303	5.43207e-08
CTSC	1.37443	0.458837	5.4756e-08
MEST	0.732222	-0.449648	5.51152e-08
ATOH8	0.468903	-1.09264	5.68641e-08
IHH	0.420703	-1.24912	5.7602e-08
SEMA5A	0.50391	-0.988763	5.83655e-08
ABAT	0.45824	-1.12582	5.83655e-08
PGAM4	1.37551	0.459966	5.99233e-08
MX2	1.79458	0.843643	6.01576e-08
ARHGAP15	1.78818	0.838492	6.36476e-08
ADM	1.64184	0.715313	6.37759e-08
HIVEP3	1.73184	0.792302	6.40051e-08
LARP6	0.501076	-0.996899	6.41378e-08
AS3MT	0.452096	-1.1453	6.63249e-08
TSEN2	0.724915	-0.464116	6.81768e-08
FAM49A	2.04581	1.03267	6.84606e-08
MGC29506	3.11486	1.63917	6.91379e-08
TRIM38	1.27633	0.351998	6.96281e-08
AMICA1	1.91686	0.938746	7.36104e-08
TLR1	1.94436	0.959296	7.52066e-08
CLIC2	1.77335	0.826478	7.55943e-08
TTC7A	1.32629	0.4074	7.57825e-08
NRXN3	0.378475	-1.40173	7.63322e-08
S100A16	1.53151	0.614954	7.74624e-08
F10	0.377341	-1.40606	7.74624e-08
ACVR1B	0.734446	-0.445272	7.82758e-08
CTTNBP2	0.359949	-1.47413	7.95876e-08
SATB1	0.543224	-0.88038	8.08012e-08
DMD	0.465164	-1.10419	8.18056e-08
CCDC14	0.710182	-0.493738	8.21303e-08
FADD	1.19493	0.256925	8.24436e-08
CRCP	0.782254	-0.35429	8.24656e-08
KRIT1	0.783615	-0.351784	8.46992e-08
TRPV6	3.05929	1.6132	8.67963e-08
SLFN5	1.80314	0.85051	8.7495e-08
RNF166	1.29276	0.370451	8.7495e-08
IL12B	1.61455	0.691133	8.7495e-08
LAIR2	2.15236	1.10592	8.78541e-08
CHST2	1.68216	0.750318	8.80206e-08
FRMD8	1.2842	0.360868	8.95943e-08
LOC148709	0.554718	-0.850174	9.06938e-08
KLRB1	2.26381	1.17875	9.1061e-08
SAA4	2.29283	1.19713	9.431e-08
ENPP5	0.521236	-0.939992	9.55528e-08
CD33	1.88148	0.91187	9.80666e-08
LOC90110	0.762187	-0.391783	9.98915e-08
UBA7	1.48844	0.573805	1.00486e-07
RAB35	1.18556	0.245574	1.01184e-07
C10orf82	0.313516	-1.67339	1.02503e-07
LOC375190	0.576137	-0.795516	1.03771e-07
REPS2	0.618571	-0.69299	1.04962e-07
C20orf112	0.674055	-0.569061	1.05526e-07
PKM2	1.37867	0.46328	1.10149e-07
XPNPEP1	1.26322	0.337112	1.12123e-07
ADAM8	1.9233	0.943582	1.12899e-07
TSPAN4	1.68513	0.752858	1.1364e-07
SPOCK2	1.86387	0.898301	1.15318e-07
SP140L	1.53342	0.616754	1.15512e-07
STX1B	1.7816	0.833175	1.16514e-07
IDO2	1.60557	0.683086	1.16514e-07
CCDC68	1.81338	0.858684	1.16514e-07
SFN	1.59001	0.669039	1.20524e-07
NUBPL	0.678964	-0.558593	1.23819e-07
CEBPE	1.82804	0.8703	1.26638e-07
RNF43	0.529484	-0.917342	1.27778e-07
GOPC	0.800699	-0.320668	1.29909e-07
CXCL16	1.50333	0.588161	1.30761e-07
SHANK2	0.587397	-0.767592	1.33806e-07
LOC344967	1.41118	0.496904	1.33832e-07
GCNT3	2.42627	1.27874	1.34182e-07
SLC25A27	0.535033	-0.902301	1.34182e-07
JHDM1D	0.737106	-0.440056	1.41712e-07
BECN1	0.833662	-0.262465	1.44944e-07
ACP2	1.28061	0.356829	1.45044e-07
GRAP2	1.83665	0.877076	1.47105e-07
2022-03-01	1.6461	0.719056	1.48908e-07
RMND5A	0.821633	-0.283433	1.5169e-07
HVCN1	1.59354	0.672238	1.57356e-07
LYN	1.44946	0.53552	1.5844e-07
MTERFD3	0.739549	-0.435283	1.5895e-07
MIAT	1.9223	0.942835	1.58972e-07
GSDMD	1.48033	0.565922	1.59363e-07
FCRL5	2.85015	1.51104	1.60829e-07
PRKAB1	0.730815	-0.452421	1.61542e-07
REC8	1.73568	0.795497	1.61897e-07
TICAM1	1.30882	0.388272	1.63772e-07
PIK3CG	2.07365	1.05217	1.6596e-07
DTHD1	1.73965	0.798801	1.67058e-07
TMC8	1.74585	0.803931	1.67168e-07
RRN3P1	0.629236	-0.668328	1.68904e-07
C1orf212	1.244	0.314991	1.72038e-07
SERPINB8	1.47537	0.561076	1.72961e-07
STON2	0.63352	-0.658538	1.77913e-07
EPB41L1	0.649848	-0.621825	1.78705e-07
C1orf107	0.811708	-0.300967	1.78809e-07
LY96	1.94779	0.961836	1.7912e-07
C10orf128	2.03202	1.02292	1.80219e-07
SLC9A7	2.04149	1.02963	1.87801e-07
TFCP2L1	0.46363	-1.10895	1.89092e-07
COL23A1	1.69133	0.758159	1.89282e-07
MANSC1	0.721055	-0.471819	1.89511e-07
AKNAD1	0.520316	-0.942539	1.90183e-07
GATAD1	0.787819	-0.344064	1.92359e-07
FAM179B	0.696441	-0.521928	1.95432e-07
GSPT2	0.461676	-1.11505	1.95888e-07
LRRC49	0.676729	-0.563351	2.00815e-07
SLC4A8	0.547979	-0.867806	2.02647e-07
SEMA3C	0.591208	-0.758261	2.04259e-07
ACOX1	0.770687	-0.375783	2.05157e-07
SLAMF6	2.03738	1.02672	2.05423e-07
GPR89A	0.820219	-0.285919	2.05423e-07
CDC25B	1.43787	0.523937	2.06161e-07
GUK1	1.37178	0.45605	2.06602e-07
ZSCAN21	0.79158	-0.337193	2.13769e-07
RHOG	1.24284	0.313641	2.22864e-07
DPEP2	1.87989	0.910647	2.27066e-07
C17orf69	0.710479	-0.493136	2.27828e-07
GCOM1	0.597872	-0.742092	2.30064e-07
FAM172A	0.748631	-0.417672	2.30906e-07
EYS	0.653938	-0.612774	2.32289e-07
RAB11FIP2	0.743523	-0.427551	2.34887e-07
QPCT	0.44089	-1.18151	2.35486e-07
TRIB2	1.76157	0.816862	2.46479e-07
LOC92249	0.664966	-0.588647	2.51411e-07
VAV3	0.416793	-1.2626	2.53763e-07
GSDMB	1.6839	0.75181	2.54956e-07
TMEM86A	1.48523	0.570686	2.57817e-07
CHI3L1	2.29261	1.19699	2.59846e-07
DOCK8	1.85544	0.891758	2.59846e-07
ZNF33A	0.79419	-0.332444	2.59927e-07
NYNRIN	0.570352	-0.810074	2.59927e-07
PQLC1	1.39175	0.476896	2.59927e-07
LYL1	1.52902	0.612611	2.60768e-07
SERPING1	1.8662	0.900105	2.60768e-07
IFITM1	1.6299	0.704787	2.6134e-07
AKAP1	0.78219	-0.354409	2.61939e-07
LY6E	1.90482	0.929655	2.61939e-07
RBM39	0.782754	-0.35337	2.67119e-07
GLIPR2	1.57478	0.655146	2.68721e-07
VSTM2L	0.35227	-1.50524	2.69572e-07
SLC37A2	2.10201	1.07177	2.72517e-07
C5AR1	1.83668	0.8771	2.81221e-07
SCARF1	1.52728	0.610964	2.8416e-07
HRASLS2	2.22784	1.15565	2.86191e-07
ST8SIA4	1.69684	0.762851	2.86191e-07
C10orf58	0.700795	-0.512935	2.86191e-07
FAM189A1	0.302157	-1.72663	2.87017e-07
GRAMD1B	2.14143	1.09857	2.88177e-07
MAGI2	0.644606	-0.63351	2.96477e-07
ZNF233	0.651774	-0.617556	3.0006e-07
YIF1B	1.29237	0.370021	3.0385e-07
SYTL5	0.416319	-1.26424	3.05507e-07
CCR4	2.09218	1.065	3.12053e-07
SYDE2	0.699805	-0.514975	3.13894e-07
LAT	1.72304	0.784952	3.16322e-07
ZNF155	0.674001	-0.569178	3.22992e-07
KGFLP2	0.636958	-0.65073	3.26006e-07
GPR68	1.75903	0.814782	3.26422e-07
TRIM7	2.85128	1.51161	3.2665e-07
RHBDF2	1.38791	0.47291	3.26727e-07
PRDM1	1.51194	0.5964	3.42682e-07
TNFSF12-TNFSF13	2.59161	1.37385	3.46462e-07
PCYOX1	0.800641	-0.320773	3.48401e-07
SCO2	1.37227	0.456563	3.48654e-07
NKD1	0.329155	-1.60316	3.52508e-07
SUPT3H	0.753866	-0.407619	3.53319e-07
CFP	1.77164	0.825084	3.68902e-07
CELP	0.2466	-2.01976	3.68902e-07
CXCR5	2.16322	1.11318	3.7379e-07
MYH7B	0.394748	-1.341	3.76002e-07
APOH	0.463007	-1.11089	3.94551e-07
ALS2CR8	0.716522	-0.480917	3.94551e-07
RAP2B	1.26303	0.33689	3.95549e-07
RPS6KA3	0.76376	-0.388808	3.95591e-07
DHDPSL	0.425955	-1.23123	3.97007e-07
OPTN	1.33833	0.420439	3.97715e-07
NPL	1.4921	0.57734	3.98888e-07
PSMA5	1.24408	0.315084	4.05346e-07
ARFGEF1	0.745223	-0.424256	4.06539e-07
SLC26A7	0.552925	-0.854843	4.2018e-07
GRM8	0.298432	-1.74453	4.22051e-07
CD79B	1.90473	0.92959	4.28386e-07
EMR3	2.07963	1.05632	4.33687e-07
CTRL	1.59416	0.672798	4.35822e-07
DSCR6	0.385711	-1.37441	4.37321e-07
LOC728819	0.502338	-0.99327	4.38565e-07
GAB1	0.773656	-0.370237	4.41228e-07
PRKAR2B	1.96787	0.976633	4.45425e-07
MUC16	2.85222	1.51209	4.50117e-07
HMGA1	1.38431	0.469172	4.55422e-07
C1orf230	0.424166	-1.2373	4.56707e-07
C14orf101	0.774	-0.369595	4.56707e-07
SLC16A3	1.54756	0.629996	4.5819e-07
GSG2	1.38789	0.472894	4.64646e-07
NCRNA00183	0.775443	-0.366907	4.66569e-07
TSPAN6	0.618931	-0.692148	4.67061e-07
HHAT	0.654145	-0.612317	4.68827e-07
ACTR1A	1.17142	0.228258	4.72375e-07
ZDHHC9	0.730665	-0.452718	4.73882e-07
FMO4	0.647695	-0.626614	4.78175e-07
FKTN	0.750997	-0.41312	4.83106e-07
FMO1	2.17814	1.1231	4.83817e-07
WDR35	0.63628	-0.652266	4.88779e-07
GPR132	1.66343	0.73416	4.95787e-07
PLCG2	1.81813	0.862457	4.96847e-07
HLA-J	1.81286	0.858266	5.01131e-07
ANGPTL6	1.61519	0.691708	5.04684e-07
C6orf163	0.632046	-0.661898	5.04684e-07
CPA6	0.297161	-1.75068	5.12775e-07
NCF4	1.77128	0.82479	5.16986e-07
TPM3	1.18678	0.247058	5.21565e-07
MYO10	0.728592	-0.456817	5.31719e-07
ADAMTS4	1.77107	0.824625	5.32902e-07
EIF2AK2	1.3253	0.406323	5.40917e-07
SGK2	0.432488	-1.20927	5.41895e-07
KLRC2	2.10106	1.07111	5.59228e-07
ADA	1.63381	0.708244	5.64422e-07
TLR6	1.80185	0.849479	5.65938e-07
OFD1	0.722252	-0.469425	5.7603e-07
SIGLEC11	1.77433	0.827271	5.90485e-07
SEC63	0.801924	-0.318463	5.96949e-07
MYD88	1.20133	0.264638	5.97428e-07
SLC39A2	0.247107	-2.01679	6.04004e-07
BLVRA	1.65732	0.72885	6.06294e-07
GAS2	0.465353	-1.1036	6.11439e-07
KCNJ15	2.15688	1.10895	6.17949e-07
GCM1	0.593598	-0.752443	6.20498e-07
CD1B	1.91111	0.934409	6.23222e-07
CXCR4	1.76699	0.821298	6.23272e-07
SLCO2B1	1.52728	0.610968	6.23272e-07
RELB	1.34473	0.427317	6.26854e-07
LMF2	1.3877	0.472693	6.51184e-07
RASSF4	1.4943	0.579467	6.53286e-07
PCMTD1	0.706335	-0.501575	6.70476e-07
LY6G6F	0.524336	-0.931436	6.79585e-07
MOV10	1.28255	0.359011	6.95102e-07
C9orf128	0.589549	-0.762317	6.95102e-07
CYP2R1	0.782526	-0.35379	6.98431e-07
ATP9A	0.615107	-0.701091	7.03683e-07
CDC20	1.40132	0.486789	7.20094e-07
LOC254559	1.7768	0.829281	7.20094e-07
DUSP16	0.754766	-0.405899	7.22596e-07
CLECL1	1.66885	0.738853	7.28916e-07
ANKK1	0.554112	-0.85175	7.34338e-07
RHEBL1	1.48481	0.570279	7.34395e-07
KCNIP3	0.546168	-0.872584	7.54246e-07
PSAP	1.26477	0.338879	7.54246e-07
GZMB	2.32648	1.21815	7.55001e-07
C14orf93	0.82364	-0.279914	7.67153e-07
VSTM1	1.54666	0.629159	7.85523e-07
AKAP6	0.607085	-0.720029	7.85654e-07
CCL19	2.74672	1.45771	8.12838e-07
MOAP1	0.827563	-0.273059	8.16399e-07
ADAM6	3.06917	1.61785	8.16655e-07
PLXNC1	2.20718	1.1422	8.18481e-07
SYT1	0.381908	-1.3887	8.24293e-07
TLE2	0.518466	-0.947678	8.27752e-07
KLF1	1.45068	0.53673	8.48761e-07
LOC92973	0.581206	-0.782879	8.49793e-07
EXOC4	0.827983	-0.272328	8.54432e-07
PLXNA2	0.723656	-0.466623	8.67016e-07
ORC1L	1.43459	0.520634	8.68626e-07
CYP2B6	0.314214	-1.67018	8.72829e-07
RS1	0.751025	-0.413067	8.74207e-07
ZIC5	4.10126	2.03607	8.74944e-07
RRAGB	0.743831	-0.426953	8.80626e-07
GPSM3	1.46988	0.5557	8.81839e-07
CXCR3	1.6986	0.764342	9.16015e-07
ZNF3	0.803591	-0.315466	9.16015e-07
VNN3	1.92112	0.941948	9.25835e-07
CCDC121	0.754471	-0.406462	9.27041e-07
C9orf71	0.333775	-1.58305	9.59016e-07
C19orf35	1.53338	0.61672	9.80101e-07
SLC16A11	0.532575	-0.908942	9.87099e-07
ATP6V1B2	1.33983	0.422046	1.00024e-06
CCL3L1	2.28972	1.19517	1.01128e-06
KRT23	0.227445	-2.13641	1.012e-06
PTPRB	0.736438	-0.441364	1.01303e-06
ZNF780B	0.750043	-0.414956	1.03512e-06
PLCB4	0.416618	-1.2632	1.03512e-06
MTERF	0.520146	-0.94301	1.04177e-06
ZNF177	0.573915	-0.80109	1.0501e-06
ETNK2	0.513246	-0.962277	1.05333e-06
PHOSPHO2	0.688713	-0.538025	1.05704e-06
C6orf103	0.570235	-0.810371	1.06066e-06
CXorf21	1.81206	0.857634	1.06766e-06
TRIM26	1.18956	0.25043	1.07045e-06
CR1L	1.38408	0.468927	1.08594e-06
TNFSF9	2.20367	1.13991	1.11105e-06
MATK	2.03517	1.02515	1.11953e-06
FCN1	2.43844	1.28596	1.1392e-06
CD180	1.91821	0.939761	1.1425e-06
LY86	1.75819	0.814093	1.15396e-06
PKHD1	0.429627	-1.21884	1.16049e-06
TDGF3	0.404961	-1.30415	1.16139e-06
RALGAPB	0.764673	-0.387084	1.16139e-06
CCDC46	0.635606	-0.653795	1.17935e-06
FARP1	0.633319	-0.658996	1.19408e-06
RAB8A	1.14921	0.200646	1.19594e-06
ABCC5	0.72299	-0.467952	1.20816e-06
NQO2	1.36664	0.450636	1.21012e-06
BRI3BP	1.36068	0.444333	1.21066e-06
TOP2B	0.793068	-0.334484	1.24037e-06
CD83	1.41403	0.499816	1.24786e-06
FLI1	1.58245	0.662162	1.25958e-06
NCOA7	1.50663	0.591324	1.25958e-06
KBTBD10	0.631033	-0.664213	1.26042e-06
EFCAB5	0.60727	-0.719589	1.26951e-06
SLC24A5	0.563949	-0.826362	1.26951e-06
PCBD2	0.813014	-0.298648	1.28473e-06
P2RY8	1.63516	0.709429	1.30699e-06
TG	0.37475	-1.416	1.30917e-06
CLEC5A	2.16708	1.11575	1.32865e-06
OAZ1	1.21152	0.276819	1.34906e-06
PDE9A	0.516551	-0.953017	1.35527e-06
NAPSB	2.05243	1.03733	1.43573e-06
PHF20	0.78169	-0.355331	1.4367e-06
AMZ1	1.75027	0.807579	1.44428e-06
TBC1D5	0.797801	-0.3259	1.45045e-06
MKLN1	0.822682	-0.281593	1.45045e-06
SERPINB1	1.43117	0.517196	1.45745e-06
FOLR2	2.04526	1.03229	1.46317e-06
NUDT18	1.36111	0.444789	1.46447e-06
RXFP4	0.524431	-0.931174	1.46969e-06
SUGT1L1	0.658695	-0.602318	1.46969e-06
GARNL3	0.665469	-0.587556	1.48606e-06
AVPR1A	1.81649	0.861154	1.50039e-06
VNN1	2.60143	1.3793	1.51714e-06
RBM20	0.544156	-0.877908	1.51714e-06
CXorf23	0.743967	-0.42669	1.53618e-06
P2RX7	1.90157	0.927193	1.53653e-06
FOXO3	0.740658	-0.43312	1.54205e-06
C12orf27	0.576448	-0.794737	1.54492e-06
NPC1	1.33004	0.411469	1.54569e-06
EIF4EBP3	0.687274	-0.541044	1.60974e-06
WISP1	1.8705	0.90342	1.60974e-06
DERL3	1.90646	0.930894	1.60974e-06
PGP	1.3018	0.380513	1.60974e-06
SCARNA9	0.629869	-0.666877	1.64529e-06
SIT1	1.97798	0.984025	1.66348e-06
C6orf154	1.84883	0.886609	1.67876e-06
FNBP1L	0.778366	-0.36148	1.7084e-06
HPX	0.596826	-0.744617	1.71922e-06
FAM40B	1.61361	0.690289	1.71922e-06
CC2D2A	0.556336	-0.845973	1.72877e-06
C17orf60	1.71394	0.777313	1.73067e-06
PLSCR1	1.31689	0.397137	1.73761e-06
ZNF470	0.505471	-0.9843	1.76962e-06
PFN1	1.24895	0.320711	1.77212e-06
SOS2	0.787967	-0.343792	1.78729e-06
GGTA1	1.82026	0.864146	1.8018e-06
STAB1	1.67488	0.744058	1.8018e-06
PPP1R14C	0.463996	-1.10782	1.8018e-06
ZIC2	4.04994	2.0179	1.81124e-06
C10orf81	1.84012	0.879801	1.81762e-06
SLC2A6	1.61205	0.6889	1.82045e-06
RNF31	1.24438	0.315423	1.82175e-06
FERMT3	1.69234	0.759016	1.8272e-06
ARHGEF9	0.734573	-0.445023	1.83035e-06
C10orf47	0.546936	-0.870557	1.83456e-06
MAP1LC3A	0.676541	-0.56375	1.84269e-06
TK1	1.40781	0.493448	1.84965e-06
MCOLN1	1.29728	0.375485	1.86054e-06
NBR1	0.818359	-0.289194	1.8814e-06
EVL	1.53265	0.616028	1.90526e-06
MOBKL1A	0.745364	-0.423983	1.91359e-06
SDF2L1	1.41102	0.496739	1.93232e-06
PGRMC1	0.803207	-0.316156	1.93953e-06
DAB2	0.662281	-0.594484	1.96271e-06
EPM2AIP1	0.599079	-0.739181	1.96525e-06
HAR1A	2.21284	1.1459	1.97549e-06
CEP290	0.694898	-0.525126	1.98176e-06
KCNH8	0.462463	-1.11259	1.99073e-06
ADAM28	1.96167	0.972083	1.99474e-06
CRTAP	0.810127	-0.30378	2.01398e-06
C19orf51	1.98524	0.989312	2.02656e-06
COX19	0.79882	-0.324057	2.0486e-06
SCAI	0.778526	-0.361182	2.05003e-06
GSTO1	1.32409	0.405004	2.07018e-06
EMP3	1.56866	0.649534	2.08768e-06
VSNL1	1.90117	0.92689	2.11635e-06
FAM200A	0.734555	-0.445058	2.13111e-06
LYSMD2	1.41236	0.498104	2.14545e-06
TLR2	1.6813	0.749579	2.15236e-06
TAF4	0.7547	-0.406024	2.1637e-06
HPS6	1.21807	0.284603	2.1923e-06
IFNGR1	1.33218	0.41379	2.21643e-06
PMFBP1	0.496073	-1.01137	2.22515e-06
KIR2DS4	1.57542	0.655737	2.22577e-06
DKFZp761E198	1.29296	0.370677	2.23775e-06
LOC400027	0.776356	-0.365209	2.25281e-06
PROC	0.529593	-0.917043	2.25281e-06
LIPA	1.41021	0.495908	2.27571e-06
SEC14L2	1.42201	0.507935	2.28326e-06
PPP2R3A	0.666259	-0.585844	2.28326e-06
IL8	2.55627	1.35404	2.32775e-06
VPS24	0.860438	-0.216858	2.34039e-06
CNGA1	0.504196	-0.987942	2.35161e-06
RGL4	1.59053	0.669503	2.35777e-06
EPB41L5	0.785621	-0.348094	2.37955e-06
ABCB1	0.392694	-1.34852	2.37955e-06
TRIM47	1.3613	0.444989	2.41695e-06
RAB43	1.26752	0.342007	2.47595e-06
TNFAIP3	1.38551	0.470422	2.4866e-06
DPY19L4	0.732065	-0.449955	2.4949e-06
SLC39A5	0.376928	-1.40764	2.51345e-06
CKB	0.418919	-1.25526	2.51345e-06
TTLL2	0.544965	-0.875764	2.51345e-06
PFKFB3	1.32276	0.403557	2.55194e-06
TCN2	1.5384	0.621426	2.59337e-06
REN	0.366411	-1.44846	2.61825e-06
FHIT	0.645483	-0.63155	2.62926e-06
HAMP	1.844	0.882841	2.64281e-06
SYN3	0.364671	-1.45533	2.64281e-06
RRP15	0.796236	-0.328731	2.64281e-06
PTPRK	0.795841	-0.329448	2.64281e-06
GRPR	0.437318	-1.19325	2.67133e-06
MCM5	1.36033	0.443954	2.68175e-06
CXCL1	1.94303	0.958311	2.68406e-06
LRP10	1.3331	0.41479	2.6991e-06
C18orf25	1.23088	0.299696	2.7048e-06
CELF3	0.407636	-1.29465	2.70741e-06
KANK1	0.693801	-0.527405	2.71254e-06
GPR81	0.386499	-1.37146	2.71692e-06
CYP27B1	1.44749	0.533554	2.72886e-06
YTHDC1	0.872672	-0.196488	2.72886e-06
ELF5	0.275478	-1.85999	2.72922e-06
HOXD10	0.411606	-1.28066	2.74768e-06
TMEM180	1.32526	0.406278	2.7579e-06
CHD7	0.742129	-0.430258	2.7579e-06
CCDC33	0.667611	-0.58292	2.77217e-06
SLC5A6	0.697256	-0.52024	2.84515e-06
SETMAR	0.761137	-0.393772	2.8652e-06
ADCY7	1.40241	0.487909	2.88377e-06
C6orf192	1.41587	0.50169	2.88566e-06
CAPZB	1.19137	0.252622	2.88566e-06
S100B	1.82469	0.867655	2.89914e-06
TLK1	0.832329	-0.264774	2.91689e-06
SERPINA6	0.35826	-1.48092	2.96566e-06
CES1	0.341381	-1.55055	2.96883e-06
GIMAP8	1.59329	0.672008	2.9822e-06
SLC39A10	0.749841	-0.415343	2.98297e-06
PXMP4	0.74619	-0.422386	2.99431e-06
PLAGL1	0.59672	-0.744874	2.99431e-06
TNFAIP6	2.15807	1.10974	3.009e-06
ZNF385A	1.6796	0.748121	3.02865e-06
CRELD2	1.35024	0.433212	3.06938e-06
COIL	0.813796	-0.297261	3.06938e-06
CYSLTR1	1.74436	0.8027	3.09191e-06
CFLAR	1.22527	0.293103	3.11328e-06
ZKSCAN1	0.724451	-0.46504	3.1188e-06
XRN1	1.3173	0.397579	3.12962e-06
HCN1	0.413129	-1.27534	3.14659e-06
C17orf66	1.28265	0.359129	3.14955e-06
CCL7	1.97613	0.982678	3.15902e-06
SUSD1	0.794052	-0.332694	3.15912e-06
PNOC	1.96367	0.97355	3.21247e-06
KLHL24	0.760743	-0.394519	3.22659e-06
RAB27B	2.20746	1.14239	3.23707e-06
ERAP1	1.35492	0.438209	3.25756e-06
DYNC1I2	0.831686	-0.265888	3.28042e-06
SIRPB1	1.83494	0.875733	3.2913e-06
SGSM1	0.528145	-0.920995	3.30221e-06
ESRRG	0.43428	-1.2033	3.31463e-06
WIPF1	1.53792	0.620982	3.32067e-06
TMEM156	1.7558	0.812126	3.32752e-06
CABC1	0.75567	-0.404171	3.36642e-06
NFAT5	0.732923	-0.448267	3.36736e-06
HMGCS2	0.271443	-1.88128	3.39897e-06
ZNF33B	0.789928	-0.340207	3.40591e-06
RASL11B	0.525538	-0.928133	3.40591e-06
MFSD2B	1.41611	0.501936	3.42772e-06
TGFB1	1.59826	0.676498	3.43374e-06
NLRP3	1.64099	0.71457	3.43944e-06
KIAA0125	2.31168	1.20894	3.50516e-06
ATRX	0.764315	-0.387761	3.55602e-06
TRAPPC6A	0.721223	-0.471482	3.55885e-06
MSI1	0.385007	-1.37705	3.56539e-06
TNIP1	1.22677	0.294861	3.59573e-06
LOC440944	0.701502	-0.51148	3.62457e-06
CCNF	1.31699	0.397249	3.63302e-06
NOTUM	0.241411	-2.05043	3.64525e-06
PBX1	0.608955	-0.715592	3.70896e-06
PSMA6	1.25628	0.329153	3.74637e-06
SEMA4B	1.40264	0.488146	3.7983e-06
FAM19A1	1.85693	0.892918	3.82069e-06
SESN1	0.580425	-0.784818	3.82407e-06
MAP1D	0.773629	-0.370286	3.8513e-06
DNAJA1	1.2123	0.277746	3.85361e-06
PIM2	1.38265	0.467433	3.85361e-06
MAPK11	1.57464	0.655024	3.98269e-06
ZNF610	0.52906	-0.918497	3.99322e-06
PSMD2	1.18445	0.244212	4.04036e-06
CUL3	0.871142	-0.19902	4.044e-06
CECR2	0.428123	-1.2239	4.05541e-06
FAM46C	1.66549	0.735945	4.05541e-06
ZNF673	0.733639	-0.446857	4.07839e-06
ARMCX5	0.783265	-0.352427	4.16583e-06
TTC3	0.80059	-0.320865	4.19322e-06
GAB3	1.5407	0.623587	4.19322e-06
PLK3	1.33235	0.413974	4.2093e-06
DZIP3	0.757836	-0.400042	4.21674e-06
C19orf10	1.23291	0.302067	4.22053e-06
C15orf58	1.31697	0.397226	4.28047e-06
CALML3	0.399229	-1.32471	4.28654e-06
KCTD5	1.20192	0.265341	4.30477e-06
FSCN1	1.85002	0.887541	4.32538e-06
PRPF40B	0.696565	-0.52167	4.34114e-06
TMEM209	0.816937	-0.291704	4.42616e-06
ROBO2	0.403017	-1.31109	4.43333e-06
HES4	1.67537	0.744482	4.51227e-06
RNF144B	1.47982	0.565418	4.56383e-06
NUDT22	1.27009	0.344935	4.58304e-06
HSD17B14	1.64554	0.718563	4.60339e-06
COL9A3	0.393315	-1.34624	4.62838e-06
KIAA1984	0.502083	-0.994002	4.63512e-06
MBP	1.3315	0.413058	4.64583e-06
LOC100133545	0.383786	-1.38163	4.65337e-06
PTCH1	0.645391	-0.631756	4.65337e-06
ROBO3	1.76194	0.817169	4.65428e-06
TMEM229B	1.54318	0.625906	4.75572e-06
RPRM	0.50736	-0.978917	4.75572e-06
C11orf87	0.649725	-0.622098	4.75572e-06
ZNF507	0.828106	-0.272113	4.76786e-06
LY6G6E	0.482492	-1.05142	4.76786e-06
PGAM5	1.25201	0.324242	4.76786e-06
SH2B3	1.39216	0.477327	4.8443e-06
DDX27	0.708374	-0.497416	4.8443e-06
THSD4	0.652922	-0.615016	4.8443e-06
C14orf129	1.4619	0.547842	4.84867e-06
RPS6KA4	1.24419	0.315209	4.87168e-06
ENTPD5	0.660384	-0.598623	5.0611e-06
ABCB4	0.576037	-0.795766	5.0611e-06
LPCAT1	1.44114	0.527208	5.09368e-06
L3MBTL	0.544222	-0.877732	5.10627e-06
SYNGR3	1.83954	0.879344	5.10627e-06
CSF2	2.08284	1.05855	5.10627e-06
PPFIBP2	0.769978	-0.37711	5.10722e-06
SKA1	1.3984	0.483781	5.17221e-06
CD300E	1.66606	0.736444	5.26117e-06
TMEM5	0.813218	-0.298285	5.27978e-06
RYR3	0.652952	-0.61495	5.28234e-06
PHF16	0.758966	-0.397892	5.29112e-06
BTN1A1	2.09833	1.06924	5.36724e-06
CMTM2	1.61824	0.694429	5.43365e-06
MGC12982	0.675055	-0.566922	5.43365e-06
ATP5A1	1.26145	0.33508	5.43365e-06
ZBED5	0.813204	-0.29831	5.43365e-06
FOSL1	1.82777	0.870082	5.4472e-06
HS3ST5	0.562553	-0.82994	5.45715e-06
TXNL4A	1.20102	0.264266	5.47171e-06
SMTN	0.735316	-0.443565	5.56365e-06
VIPR1	0.602509	-0.730944	5.61566e-06
KCNQ1OT1	0.622191	-0.68457	5.69426e-06
TUBA1B	1.25133	0.323461	5.69426e-06
ZDHHC18	1.20942	0.274312	5.70491e-06
TTC37	0.750089	-0.414866	5.75016e-06
SLC5A12	0.49979	-1.0006	5.75237e-06
ZNF345	0.590815	-0.759221	5.78231e-06
BIN2	1.46815	0.553998	5.78846e-06
TAS2R5	0.645836	-0.630761	5.85073e-06
TRAF3	1.24123	0.311769	5.89225e-06
ZNF419	0.656294	-0.607585	5.92371e-06
TLR7	1.85793	0.893698	5.95299e-06
KIF5B	0.766759	-0.383156	5.9882e-06
CHAC2	1.58871	0.667853	5.99116e-06
PABPC1	0.778154	-0.361872	6.02082e-06
ZFP62	0.800257	-0.321464	6.06344e-06
FHDC1	0.666948	-0.584354	6.09881e-06
OCRL	0.782162	-0.354461	6.12884e-06
BBS5	0.673005	-0.57131	6.1769e-06
ALPK2	1.75939	0.815077	6.18459e-06
TET1	0.636142	-0.652578	6.18901e-06
FGFR3	0.542495	-0.882318	6.20489e-06
KLHL31	0.601926	-0.732343	6.21109e-06
MATN2	0.532449	-0.909285	6.21712e-06
NFKBIA	1.28284	0.359338	6.23882e-06
PHF3	0.803928	-0.314862	6.24559e-06
SLC24A1	0.753405	-0.408502	6.24575e-06
POLG2	0.803512	-0.315609	6.29071e-06
EPC2	0.840021	-0.251502	6.30095e-06
ZSWIM5	0.653555	-0.61362	6.3064e-06
APOLD1	0.517246	-0.951078	6.3064e-06
NXPH1	0.605627	-0.723499	6.3064e-06
KLK10	2.84817	1.51004	6.32973e-06
C1orf56	0.761344	-0.39338	6.3474e-06
CNTN3	0.438169	-1.19044	6.39365e-06
RNF160	0.705276	-0.503741	6.53504e-06
SOSTDC1	0.367445	-1.4444	6.60184e-06
VIL1	0.599133	-0.739053	6.66929e-06
ZNF846	0.735283	-0.443629	6.67449e-06
MLH3	0.815649	-0.29398	6.67449e-06
ZNF672	1.21562	0.281698	6.73158e-06
FRYL	0.745087	-0.42452	6.73501e-06
CEP63	0.839399	-0.252571	6.82547e-06
MAD2L2	1.30405	0.382996	6.85108e-06
FHOD3	0.529757	-0.916596	6.85108e-06
LRRC37A3	0.652454	-0.616052	6.92014e-06
ATL3	1.32385	0.40474	7.03886e-06
NF1	0.807916	-0.307723	7.10429e-06
PLAGL2	0.670607	-0.576461	7.10986e-06
BFSP2	1.46681	0.552686	7.19796e-06
BPTF	0.796119	-0.328944	7.21412e-06
F2	0.490869	-1.02659	7.26691e-06
SRPK3	0.497623	-1.00688	7.28492e-06
C19orf2	0.839132	-0.253031	7.34198e-06
ZNF41	0.806794	-0.309727	7.34198e-06
GALNT11	0.799484	-0.322859	7.37186e-06
GPR183	1.77724	0.829641	7.37186e-06
ZFYVE28	1.45113	0.537176	7.42524e-06
TNNC2	0.358173	-1.48127	7.42524e-06
ZFP112	0.704454	-0.505423	7.54991e-06
SEC24D	1.36247	0.446226	7.56009e-06
SERTAD1	1.30943	0.38894	7.63541e-06
PLK1	1.31832	0.398703	7.83634e-06
TBCK	0.783448	-0.352091	7.83634e-06
CSF2RA	1.83121	0.872798	7.94779e-06
C21orf49	0.625076	-0.677896	7.9784e-06
GPR34	1.79391	0.843106	8.09194e-06
IMMP1L	0.801163	-0.319833	8.10244e-06
TTR	0.441935	-1.17809	8.13728e-06
GAS2L1	1.42401	0.509963	8.14505e-06
RAC2	1.50447	0.589253	8.26174e-06
KCNJ10	1.80479	0.851834	8.26404e-06
C18orf10	1.26403	0.338025	8.34527e-06
SPIRE2	0.679443	-0.557576	8.36832e-06
LRMP	1.88794	0.916813	8.36887e-06
ANXA2P2	1.32583	0.406899	8.44552e-06
LOC728758	0.761779	-0.392556	8.46751e-06
MBOAT1	1.32064	0.401237	8.47183e-06
CCL23	1.66311	0.733882	8.6047e-06
ACOXL	1.70307	0.768134	8.62975e-06
NFASC	0.565385	-0.822694	8.64048e-06
ARRDC5	1.37804	0.462615	8.64048e-06
NRGN	1.51772	0.601904	8.66724e-06
ATP8B3	1.63941	0.713174	8.69669e-06
MTA3	0.868511	-0.203384	8.78207e-06
SLC13A2	0.323269	-1.62919	8.81193e-06
FECH	1.35688	0.440292	8.81902e-06
TUBA1C	1.23221	0.301249	8.81902e-06
PRR16	1.62767	0.70281	8.8248e-06
PRSS23	0.630478	-0.665483	8.84161e-06
GGNBP2	0.86629	-0.207078	8.861e-06
DZIP1L	1.60076	0.67876	8.92403e-06
ZNF830	0.800884	-0.320335	9.03065e-06
TRAF7	1.20822	0.272879	9.05549e-06
ZNF514	0.72532	-0.463311	9.0923e-06
ZNF12	0.805047	-0.312855	9.25342e-06
TMED6	0.577895	-0.791121	9.27213e-06
RGS1	1.83199	0.873413	9.68664e-06
MLL5	0.804741	-0.313404	9.69177e-06
ADAMTSL2	0.556914	-0.844473	9.71528e-06
LRRC1	1.18138	0.240473	9.89515e-06
RAB39B	1.71694	0.779838	9.93975e-06
STAT5A	1.34993	0.432884	9.97221e-06
LOC339290	0.621141	-0.687006	1.0103e-05
ZNF26	0.803655	-0.315352	1.01875e-05
FAM184B	0.464673	-1.10571	1.01984e-05
ODAM	0.367996	-1.44224	1.02247e-05
VWA2	0.501329	-0.996171	1.02247e-05
CX3CL1	1.65191	0.724131	1.02247e-05
NCOA5	0.828694	-0.271088	1.02247e-05
GRHL2	0.810332	-0.303415	1.02605e-05
GPR56	0.741615	-0.431257	1.02838e-05
SLC6A12	1.81779	0.862184	1.03253e-05
RIMBP3	1.78934	0.839428	1.04148e-05
AGK	0.784618	-0.349938	1.04397e-05
USP40	0.82768	-0.272855	1.05793e-05
C19orf59	2.12664	1.08857	1.05855e-05
TPTE2P1	0.542166	-0.883194	1.05868e-05
DENND4C	0.792443	-0.335621	1.06152e-05
ADAM32	0.448581	-1.15656	1.06789e-05
NBR2	0.735893	-0.442431	1.06911e-05
SLC35F1	0.650938	-0.619407	1.06911e-05
TMEM150C	0.518858	-0.946589	1.07142e-05
CALCA	0.386009	-1.3733	1.08286e-05
CLIC5	1.5483	0.630685	1.08686e-05
RPL7	0.775196	-0.367367	1.09573e-05
STX5	1.17887	0.237404	1.1006e-05
RWDD3	0.81174	-0.30091	1.12117e-05
CTPS2	0.765274	-0.385951	1.13953e-05
TRANK1	1.43013	0.516143	1.14121e-05
METTL8	0.828194	-0.271958	1.14784e-05
SERPINB6	1.37346	0.457811	1.15463e-05
CDC42EP1	1.43268	0.518713	1.15641e-05
C8orf77	0.625824	-0.67617	1.16239e-05
PDE3B	0.696829	-0.521124	1.16373e-05
A1CF	0.506124	-0.982437	1.16413e-05
ZC4H2	0.632688	-0.660435	1.17085e-05
OGDHL	0.370412	-1.4328	1.18588e-05
PARP15	1.69706	0.763039	1.18668e-05
LOC157381	0.716078	-0.481811	1.18869e-05
PVR	0.810681	-0.302795	1.19041e-05
TET3	0.781559	-0.355573	1.19264e-05
ZNF608	0.677481	-0.561747	1.19855e-05
EHD4	1.25206	0.324301	1.19992e-05
GPR128	2.61017	1.38414	1.20066e-05
SCAPER	0.778644	-0.360965	1.20115e-05
PUM2	0.86353	-0.211683	1.20237e-05
TGM2	1.60178	0.679676	1.22682e-05
WDR93	0.659951	-0.59957	1.22682e-05
PIGM	0.824816	-0.277856	1.22747e-05
MAPK12	1.68476	0.752542	1.22849e-05
C2orf89	0.634959	-0.655264	1.22849e-05
C22orf25	1.20696	0.271374	1.23115e-05
ZMYND11	0.854088	-0.227544	1.24577e-05
CFD	1.99481	0.996251	1.26182e-05
MYOM3	0.458328	-1.12555	1.26209e-05
GPR120	2.36102	1.23941	1.26229e-05
IGF2BP3	2.9159	1.54394	1.26502e-05
MEGF11	0.516429	-0.953357	1.27173e-05
BCL3	1.32301	0.403823	1.27311e-05
LOC100132354	0.495079	-1.01427	1.27311e-05
TCF19	1.2535	0.32596	1.27419e-05
MTA2	1.17311	0.230334	1.27702e-05
TREX1	1.34707	0.429827	1.27702e-05
C17orf62	1.2103	0.275368	1.27832e-05
CADPS	0.378312	-1.40235	1.28554e-05
LYG1	1.71542	0.778565	1.29912e-05
ALOX5	1.8309	0.872551	1.31147e-05
BCAS3	0.757066	-0.401509	1.34154e-05
ANKRD26	0.720613	-0.472703	1.34347e-05
CHN2	0.5731	-0.803141	1.35877e-05
RUSC1	1.19073	0.251852	1.36199e-05
RILP	1.39635	0.481662	1.36468e-05
ATP6V0D1	1.19961	0.262563	1.37144e-05
CXCL14	0.370894	-1.43092	1.37611e-05
VCAM1	1.64329	0.716591	1.39396e-05
ZNF34	0.76028	-0.395397	1.39851e-05
SBF2	0.831969	-0.265399	1.39878e-05
IL17RD	0.56941	-0.812461	1.40204e-05
CCDC45	0.809418	-0.305044	1.40834e-05
RASGRP3	1.51243	0.596871	1.409e-05
UAP1L1	1.45604	0.542047	1.44261e-05
CCL25	2.83192	1.50178	1.44776e-05
C8orf44	0.736977	-0.440308	1.46501e-05
PRKACB	0.596047	-0.746502	1.46501e-05
PRLR	0.563685	-0.82704	1.48515e-05
SH2D2A	1.38994	0.475023	1.48536e-05
SEMA6B	1.54569	0.628255	1.50143e-05
IL12RB2	1.68314	0.751157	1.50986e-05
NPW	0.489438	-1.0308	1.51327e-05
ZNF713	0.731287	-0.451491	1.51657e-05
GPRASP2	0.736126	-0.441976	1.51696e-05
ZNF720	0.835905	-0.25859	1.52439e-05
DCP1B	0.83552	-0.259253	1.52703e-05
C7orf31	0.66856	-0.580872	1.53167e-05
LOC286367	0.641634	-0.640178	1.54413e-05
TMEM65	0.735735	-0.442741	1.54547e-05
TRAPPC4	1.23408	0.303434	1.54956e-05
RCOR3	0.826531	-0.274859	1.55046e-05
SOX4	0.745789	-0.423161	1.55596e-05
COX8A	1.27023	0.345089	1.55774e-05
PAQR4	1.27567	0.35125	1.56462e-05
MACC1	0.679064	-0.55838	1.565e-05
LOC646762	0.707734	-0.498721	1.58801e-05
ZNF250	0.791842	-0.336716	1.59557e-05
LOC145837	0.458301	-1.12563	1.61216e-05
POLA2	1.24559	0.316828	1.61221e-05
RFX5	1.20377	0.267564	1.63188e-05
PARD6A	1.36257	0.446328	1.66283e-05
METRN	1.84252	0.881677	1.66283e-05
ERI1	1.34855	0.431411	1.67457e-05
ZNF804A	1.63559	0.709812	1.68318e-05
OSGEPL1	0.802363	-0.317674	1.68463e-05
CXXC1	1.26749	0.341972	1.68463e-05
TM9SF4	0.781743	-0.355234	1.70779e-05
KIAA0355	0.803578	-0.31549	1.71025e-05
COBLL1	0.722433	-0.469064	1.71252e-05
C2orf65	1.86742	0.901048	1.71616e-05
C8orf45	0.571105	-0.808171	1.7436e-05
FAIM3	1.61961	0.69565	1.74436e-05
LPAL2	0.647081	-0.627981	1.77048e-05
CYP39A1	0.587938	-0.766265	1.77067e-05
PCDH20	0.360921	-1.47024	1.77128e-05
TACC2	0.795463	-0.330133	1.77578e-05
SAMD13	0.607817	-0.718291	1.77578e-05
PGAP1	0.656259	-0.607662	1.78017e-05
HPS5	1.20937	0.274261	1.78371e-05
LMX1A	0.627316	-0.672735	1.79395e-05
ZNF23	0.817215	-0.291212	1.79674e-05
PLCB2	1.53077	0.614256	1.80958e-05
EFR3B	0.584212	-0.775436	1.82158e-05
LOC84931	0.582445	-0.779808	1.8432e-05
FSTL4	0.467629	-1.09656	1.8432e-05
ZNF234	0.767677	-0.381428	1.8432e-05
SLC5A9	0.446531	-1.16317	1.84614e-05
SLC11A2	0.777228	-0.36359	1.85537e-05
BCAM	0.637867	-0.648674	1.8605e-05
C11orf95	0.712414	-0.489213	1.86727e-05
VAMP3	1.20025	0.263336	1.89818e-05
AUTS2	0.638528	-0.647178	1.93556e-05
ZNF502	0.606025	-0.72255	1.94448e-05
TRIM15	1.50483	0.589603	1.94564e-05
MAF	1.51874	0.602878	1.94951e-05
MTHFR	1.29695	0.375122	1.94951e-05
STX16	0.754351	-0.406693	1.95117e-05
C8orf47	0.439738	-1.18528	1.95117e-05
PHC3	0.838393	-0.254302	1.97046e-05
C10orf99	0.307706	-1.70038	1.99138e-05
CXXC4	0.571529	-0.807101	2.00378e-05
PKD2L1	1.48751	0.572901	2.01033e-05
UPF3A	0.762681	-0.390848	2.01399e-05
RNF38	0.829531	-0.269631	2.01636e-05
FER1L4	0.45594	-1.13309	2.02496e-05
ANKRD46	0.728537	-0.456926	2.035e-05
ZNF571	0.763195	-0.389876	2.03615e-05
TDO2	1.92049	0.941472	2.04376e-05
PGM3	1.22205	0.2893	2.04376e-05
JRKL	0.789627	-0.340756	2.04778e-05
TMEM171	1.58913	0.668241	2.05349e-05
CENPO	1.21736	0.283758	2.0545e-05
COL5A3	1.63376	0.708196	2.06502e-05
RALGAPA1	0.803587	-0.315474	2.06881e-05
SPRY3	0.738202	-0.437912	2.11153e-05
C2CD4A	2.00126	1.00091	2.14579e-05
C10orf125	1.59389	0.67255	2.15312e-05
CD177	2.69099	1.42814	2.15507e-05
NAGK	1.21067	0.275811	2.15721e-05
CLEC4G	1.56253	0.643881	2.18738e-05
PSMB6	1.22706	0.295201	2.18995e-05
ENAH	0.712645	-0.488746	2.19933e-05
TBCE	0.813631	-0.297553	2.21305e-05
FOXO3B	0.776929	-0.364145	2.22393e-05
TINAG	0.426664	-1.22883	2.22678e-05
CCT6P1	0.794186	-0.332451	2.22678e-05
MT1E	2.12616	1.08825	2.22678e-05
PABPC3	0.778649	-0.360954	2.24033e-05
RNASE2	1.60736	0.68469	2.24033e-05
TRMT12	0.664891	-0.58881	2.24786e-05
ANXA2	1.30559	0.384706	2.27429e-05
HS3ST3A1	1.70725	0.771671	2.28228e-05
ARHGEF6	1.55497	0.636887	2.286e-05
AKR7A2	1.24946	0.3213	2.30747e-05
METRNL	1.49496	0.580107	2.31107e-05
KCNE1	1.53218	0.615582	2.32797e-05
CYBA	1.46349	0.549413	2.32825e-05
PDE6B	1.62972	0.704628	2.33651e-05
EIF4E3	1.51518	0.599487	2.33987e-05
CYP26B1	1.74331	0.801826	2.34482e-05
FAM171A1	0.741674	-0.431142	2.3548e-05
HYMAI	0.681003	-0.554266	2.37382e-05
SNCAIP	0.491165	-1.02572	2.38146e-05
DUSP4	2.12519	1.08759	2.39498e-05
PKMYT1	1.40465	0.490207	2.40229e-05
NCOA3	0.7933	-0.334062	2.41699e-05
RABGAP1	0.82912	-0.270347	2.43525e-05
CEACAM19	0.625459	-0.677012	2.43525e-05
FAM105A	0.673469	-0.570317	2.44355e-05
C3orf19	0.857701	-0.221453	2.44826e-05
TMEM168	0.78073	-0.357104	2.44826e-05
MLKL	1.20388	0.267693	2.45505e-05
ME2	1.37883	0.463446	2.46772e-05
PLLP	1.84932	0.886993	2.46987e-05
OLR1	2.08429	1.05956	2.47081e-05
VAV1	1.68307	0.751099	2.47318e-05
ALDOA	1.25375	0.326251	2.47669e-05
ZSWIM3	0.703633	-0.507105	2.4799e-05
GYPC	1.50863	0.593238	2.48009e-05
ICAM5	1.73817	0.797566	2.50989e-05
WWP2	1.17485	0.232472	2.51881e-05
TAB3	0.783475	-0.35204	2.53313e-05
FUT11	1.33365	0.415383	2.53371e-05
ZMYM2	0.767172	-0.382378	2.53371e-05
LPPR1	0.407429	-1.29538	2.539e-05
INO80D	0.820808	-0.284883	2.54921e-05
SS18L1	0.79227	-0.335936	2.56078e-05
SLC19A3	0.422706	-1.24227	2.57363e-05
ERP27	0.436776	-1.19504	2.58133e-05
ASH1L	0.798798	-0.324098	2.60412e-05
CSRNP3	0.626558	-0.67448	2.6094e-05
ASNA1	1.21172	0.277054	2.6272e-05
HS3ST1	1.39672	0.482044	2.6645e-05
C1orf161	0.540984	-0.886342	2.66939e-05
PLA2G4F	0.522002	-0.937872	2.66939e-05
CD82	1.4048	0.49036	2.67061e-05
ZNF780A	0.838524	-0.254076	2.67814e-05
ANKRA2	0.824796	-0.277891	2.68425e-05
PAN3	0.758964	-0.397897	2.69136e-05
ANGPTL4	1.72471	0.786351	2.74645e-05
ZNF737	0.529406	-0.917553	2.74797e-05
ZNF197	0.836952	-0.256783	2.74797e-05
TRNAU1AP	1.22104	0.288109	2.80235e-05
HOXD11	0.431976	-1.21098	2.86696e-05
DCAF17	0.839581	-0.252258	2.86725e-05
CP	2.36637	1.24268	2.88407e-05
ATP8B4	1.4869	0.572304	2.91471e-05
MRE11A	0.77686	-0.364274	2.91656e-05
SPAG1	0.639818	-0.644267	2.97672e-05
FREM1	0.36968	-1.43565	3.00071e-05
FAM150A	0.464516	-1.1062	3.04477e-05
C6orf150	1.60356	0.681277	3.04506e-05
LMNA	1.26623	0.340536	3.0601e-05
ITFG2	0.815426	-0.294373	3.07073e-05
ALAD	0.827543	-0.273094	3.10256e-05
CD79A	2.2308	1.15756	3.10703e-05
IL22RA2	1.74842	0.806053	3.10907e-05
KCNK1	1.6858	0.75343	3.12501e-05
LGALS3BP	1.26238	0.336151	3.13923e-05
CDHR1	0.330541	-1.5971	3.14693e-05
PPARG	0.700078	-0.514413	3.14957e-05
LDLRAD3	0.643187	-0.636691	3.15513e-05
SAMD12	0.737091	-0.440086	3.15615e-05
EZR	1.26266	0.33647	3.16415e-05
PACRG	0.625503	-0.676912	3.17903e-05
NSUN7	0.617927	-0.694492	3.18177e-05
SUOX	0.7917	-0.336975	3.22763e-05
APOC1P1	1.33759	0.419634	3.22763e-05
GRAMD1A	0.756738	-0.402134	3.24328e-05
SRCIN1	0.584516	-0.774685	3.24756e-05
LOC100130581	0.723344	-0.467245	3.2639e-05
CCL17	1.77086	0.824447	3.26501e-05
MAGI1	0.779713	-0.358986	3.28635e-05
RFWD2	0.860977	-0.215953	3.29141e-05
ZNF195	0.797655	-0.326163	3.36223e-05
INS-IGF2	0.388411	-1.36434	3.36223e-05
AP1B1	1.21411	0.2799	3.37146e-05
CTSG	2.10642	1.0748	3.37492e-05
KCNJ5	1.84525	0.88382	3.38304e-05
ASXL1	0.788748	-0.342363	3.38485e-05
TIGD6	0.85138	-0.232125	3.38796e-05
CD47	1.2373	0.307195	3.38987e-05
DFNB59	0.695042	-0.524828	3.4045e-05
GGT7	0.54646	-0.871812	3.40554e-05
EIF2AK1	0.84435	-0.244087	3.46315e-05
UNC93B1	1.27624	0.351899	3.47232e-05
ITPRIPL1	1.63493	0.709228	3.49955e-05
R3HDML	0.582172	-0.780483	3.51787e-05
NIPSNAP3B	0.692333	-0.530463	3.53521e-05
RUFY4	1.68946	0.756562	3.53669e-05
USP34	0.833949	-0.26197	3.54686e-05
RNF103	0.820922	-0.284683	3.56167e-05
HDC	1.78759	0.838014	3.58529e-05
XKR9	2.27509	1.18592	3.59466e-05
ATF7	0.84639	-0.240605	3.59597e-05
MDK	1.57422	0.654638	3.61117e-05
SP3	0.845931	-0.241389	3.61459e-05
LRIT2	0.48255	-1.05125	3.6149e-05
ZNF443	0.783937	-0.35119	3.65621e-05
HRSP12	0.74364	-0.427324	3.66277e-05
SLC30A2	0.370315	-1.43318	3.66734e-05
KIF7	0.669454	-0.578943	3.66873e-05
ASF1B	1.27485	0.350331	3.66873e-05
ATP6V0C	1.24135	0.311907	3.67014e-05
CLASP2	0.837768	-0.255378	3.68109e-05
WDR8	1.1934	0.255081	3.68366e-05
C17orf59	1.25803	0.331162	3.68455e-05
SH3BP4	0.774535	-0.368598	3.68516e-05
PI4K2A	1.18168	0.240844	3.69121e-05
MGC12916	1.54279	0.625545	3.72703e-05
LUC7L3	0.816612	-0.292278	3.7431e-05
ICMT	1.17103	0.227775	3.7566e-05
IL6	2.28244	1.19058	3.75679e-05
PAOX	1.3761	0.46059	3.76233e-05
LGR5	0.443721	-1.17227	3.7877e-05
CBX1	0.835351	-0.259545	3.78836e-05
FLRT1	0.617696	-0.695031	3.78836e-05
ZNF638	0.823546	-0.280079	3.79243e-05
BDNFOS	0.662118	-0.59484	3.81116e-05
UNC5A	2.02247	1.01612	3.81847e-05
KCNMB3	0.71349	-0.487035	3.83294e-05
C7orf52	0.56886	-0.813855	3.84264e-05
LPHN3	0.549157	-0.864708	3.85708e-05
ARHGEF19	0.730376	-0.453288	3.89036e-05
CDC42EP2	1.37557	0.460025	3.89916e-05
ZDHHC8P1	0.480857	-1.05632	3.89916e-05
VKORC1L1	0.85104	-0.232701	3.90547e-05
AKD1	0.754213	-0.406957	3.92077e-05
PIGR	3.49176	1.80396	3.93098e-05
POU2AF1	2.25143	1.17084	3.93098e-05
HLA-L	1.87043	0.903369	3.97993e-05
LOC201651	0.556554	-0.845407	3.98469e-05
LAPTM4B	0.591	-0.758771	3.98935e-05
GMPPB	1.28442	0.361121	3.99967e-05
HYOU1	1.21461	0.280499	4.00182e-05
MEP1A	0.40183	-1.31534	4.0169e-05
RUNX3	1.63813	0.712052	4.01996e-05
WRAP53	1.23685	0.30667	4.02142e-05
HSPA8	1.23684	0.306664	4.02142e-05
TYMS	1.39906	0.484459	4.02837e-05
LOC285419	0.640364	-0.643035	4.03903e-05
CENPM	1.42016	0.506052	4.08056e-05
SMTNL2	0.460648	-1.11826	4.08056e-05
ANXA9	0.622543	-0.683755	4.08412e-05
CLK1	0.794852	-0.331243	4.08565e-05
CTNNA2	0.388051	-1.36568	4.11339e-05
WNT5B	0.603398	-0.728819	4.11791e-05
C11orf41	2.28334	1.19115	4.1213e-05
SLC19A2	0.775531	-0.366744	4.12574e-05
DNMT3B	0.681671	-0.552852	4.12574e-05
FBXO39	1.5825	0.662204	4.14151e-05
SCT	0.51655	-0.953021	4.14151e-05
SCMH1	0.841194	-0.24949	4.14393e-05
LOC442454	0.775804	-0.366237	4.15477e-05
TMPRSS3	1.97168	0.979424	4.16134e-05
DTNA	0.475544	-1.07235	4.16134e-05
WDR5B	0.812	-0.300449	4.16134e-05
C6orf153	1.1681	0.224168	4.17171e-05
PUSL1	1.32644	0.407563	4.17171e-05
C18orf18	0.57439	-0.799896	4.17554e-05
FRZB	0.537163	-0.896568	4.21035e-05
TMEM184A	0.697135	-0.520489	4.23409e-05
SATL1	0.775744	-0.366347	4.24681e-05
ACSL6	0.345647	-1.53263	4.27019e-05
PTK2	0.838018	-0.254948	4.27785e-05
GATA3	1.65289	0.724991	4.27785e-05
MICA	1.2216	0.288775	4.27819e-05
CD300LB	1.61112	0.688062	4.31683e-05
LOC148189	0.695027	-0.524858	4.34302e-05
FAM155B	0.336368	-1.57189	4.35491e-05
TNFRSF17	2.15898	1.11035	4.35491e-05
PMP22	1.49454	0.579698	4.36465e-05
DCLRE1B	1.20327	0.26696	4.3649e-05
ENGASE	0.646488	-0.629305	4.3649e-05
SCARNA7	0.716203	-0.48156	4.36612e-05
ZNF469	1.74775	0.805499	4.37178e-05
MESP1	1.88584	0.915207	4.37178e-05
OVGP1	0.686977	-0.541667	4.37566e-05
AIFM3	0.471053	-1.08604	4.37713e-05
TRAF5	0.729557	-0.454907	4.38213e-05
NCK2	0.797114	-0.327142	4.38944e-05
CHIT1	2.64524	1.4034	4.39961e-05
ZNF766	0.836643	-0.257317	4.42644e-05
FAM177A1	0.809402	-0.305071	4.43419e-05
TTC18	0.608019	-0.717812	4.47997e-05
PIGZ	0.603217	-0.72925	4.51801e-05
HRC	0.668036	-0.582001	4.53052e-05
PLA2G12A	0.834613	-0.260821	4.55926e-05
ZNF621	0.819597	-0.287014	4.56027e-05
TREML1	1.34259	0.425018	4.56985e-05
ALG10B	0.643256	-0.636534	4.59621e-05
AKAP9	0.78809	-0.343568	4.6157e-05
AJAP1	1.49482	0.57997	4.61878e-05
TCEAL4	0.747089	-0.420647	4.63481e-05
ZNF782	0.76927	-0.378438	4.63481e-05
STK36	0.782325	-0.354161	4.64772e-05
TRIM46	1.4842	0.569684	4.67047e-05
RASSF2	1.55464	0.636579	4.67905e-05
ZRANB1	0.873055	-0.195855	4.71143e-05
LOC151009	0.710725	-0.492637	4.71143e-05
PSMB4	1.16708	0.222908	4.7145e-05
AGBL2	0.671462	-0.574622	4.74447e-05
ZNF763	0.742244	-0.430035	4.75171e-05
GPR82	1.6023	0.68014	4.84455e-05
GYG2	0.534517	-0.903692	4.84617e-05
ZHX3	0.762614	-0.390975	4.855e-05
ISPD	0.718997	-0.475942	4.86648e-05
APP	0.804251	-0.314282	4.88537e-05
UBE2J2	1.15793	0.211554	4.90014e-05
RBCK1	1.27941	0.355474	4.91136e-05
ZNF268	0.696337	-0.522143	4.93457e-05
HDAC5	0.758244	-0.399265	4.93672e-05
EGFL6	1.70461	0.769443	4.94472e-05
TCF7	0.682629	-0.550826	4.94976e-05
MPHOSPH10	0.840261	-0.251091	4.95275e-05
BCL11A	0.603438	-0.728723	4.97502e-05
LOC284440	0.736058	-0.442108	5.00575e-05
GMEB1	1.20377	0.26756	5.03146e-05
STX10	1.20997	0.274975	5.03223e-05
ATIC	0.847728	-0.238327	5.05391e-05
WFIKKN2	0.657239	-0.60551	5.08896e-05
FLJ35024	0.668875	-0.580191	5.12804e-05
BAZ2B	0.784902	-0.349415	5.16061e-05
PRINS	0.766993	-0.382714	5.16433e-05
VAPB	0.824449	-0.278497	5.20302e-05
PPM1H	0.739399	-0.435574	5.23612e-05
SGMS1	1.30157	0.380254	5.25545e-05
ANXA8L2	1.94709	0.961317	5.29249e-05
MMP9	1.90903	0.932843	5.31554e-05
RGL2	0.782245	-0.354307	5.33424e-05
LRRC33	1.46047	0.546435	5.33424e-05
GPR179	0.677924	-0.560804	5.34265e-05
PIP4K2A	1.26243	0.336206	5.34846e-05
ARAP3	0.682389	-0.551334	5.40072e-05
GGT5	1.55868	0.640328	5.40072e-05
TATDN1	0.774272	-0.369088	5.42743e-05
CCDC66	0.79906	-0.323624	5.44031e-05
HCG18	0.831449	-0.266301	5.44659e-05
PCYT1A	1.16109	0.215476	5.48415e-05
BDH2	0.725647	-0.462661	5.52918e-05
CDCA5	1.28296	0.359473	5.5329e-05
SLC43A3	1.7885	0.838753	5.587e-05
RASSF1	1.21415	0.279942	5.59059e-05
LUZP2	0.560658	-0.834807	5.59059e-05
SLC47A1	1.69105	0.757921	5.59059e-05
GCH1	1.26639	0.340725	5.60123e-05
GALNT6	0.70969	-0.494739	5.61758e-05
PRKD2	1.23058	0.299343	5.61854e-05
OAS1	1.37993	0.464598	5.63935e-05
PHYHIPL	0.384071	-1.38056	5.68172e-05
CUX1	0.797155	-0.327068	5.68602e-05
PGAP3	0.745527	-0.423667	5.71309e-05
TUBB	1.19183	0.253176	5.71309e-05
LRP11	0.811134	-0.301988	5.71841e-05
VPS54	0.84294	-0.246498	5.73619e-05
MBD5	0.791504	-0.337332	5.75644e-05
BOD1L	0.797978	-0.32558	5.76638e-05
C2orf15	0.799705	-0.322461	5.83307e-05
TMEM110	1.22679	0.294885	5.8792e-05
KIAA0040	1.32108	0.401723	5.88469e-05
SLC1A7	0.406594	-1.29834	5.90292e-05
ZFP28	0.534047	-0.90496	5.90688e-05
GAS1	2.13992	1.09756	5.90927e-05
TMEM173	1.41222	0.497968	5.91023e-05
CCDC69	1.49186	0.577111	5.91023e-05
CCL2	1.72525	0.786806	5.91689e-05
TNFSF13	1.41564	0.501459	5.91846e-05
RIPK1	1.15879	0.212625	5.94655e-05
PIN4	0.779705	-0.358999	5.94755e-05
EIF5A	1.24627	0.317618	5.96157e-05
KIF2C	1.2719	0.346982	6.015e-05
FLJ33630	0.808681	-0.306357	6.02298e-05
QPRT	0.443529	-1.1729	6.02298e-05
TNFAIP8	1.38933	0.47439	6.03893e-05
VANGL2	0.493909	-1.01768	6.14495e-05
ARNTL	1.24103	0.311533	6.14495e-05
CDKL2	0.602281	-0.73149	6.16501e-05
TPSB2	1.95416	0.966549	6.17168e-05
DNAH6	0.684574	-0.546723	6.17168e-05
CACNA2D2	0.496666	-1.00965	6.2323e-05
TSPAN7	0.568974	-0.813566	6.35231e-05
NACA	0.853813	-0.228007	6.36834e-05
FRMD3	1.76149	0.816795	6.38389e-05
C3	2.00666	1.0048	6.40044e-05
SERPINB5	2.28896	1.19469	6.40437e-05
SLC22A11	0.382409	-1.38681	6.42231e-05
PARP10	1.36056	0.444198	6.47559e-05
BMP7	0.403901	-1.30793	6.4867e-05
PHF20L1	0.798758	-0.32417	6.51976e-05
VWDE	0.472372	-1.08201	6.55987e-05
AK3	0.807783	-0.307961	6.56584e-05
LOC100128288	0.696145	-0.522541	6.56986e-05
GPAM	0.818978	-0.288104	6.58133e-05
TMEM8B	0.771189	-0.374844	6.59351e-05
PARK2	0.614631	-0.702208	6.60624e-05
DLG1	0.853938	-0.227797	6.62556e-05
LARS	0.861739	-0.214677	6.65166e-05
MLH1	0.657713	-0.604471	6.65763e-05
OPCML	0.582165	-0.780501	6.66357e-05
SHD	0.589089	-0.763442	6.66357e-05
TPK1	1.35801	0.441495	6.68476e-05
THADA	0.863151	-0.212316	6.68476e-05
TOP1MT	0.712383	-0.489275	6.70356e-05
PLEKHN1	1.54099	0.623858	6.75243e-05
NRIP2	0.760923	-0.394177	6.75554e-05
CEACAM3	1.66574	0.736163	6.78285e-05
SECISBP2	0.847917	-0.238004	6.80525e-05
ZFHX3	0.758007	-0.399717	6.83718e-05
PLBD2	1.25904	0.332319	6.87282e-05
CFH	1.60292	0.680702	6.90524e-05
SPATC1	1.46079	0.546752	6.95191e-05
ZNF587	0.782588	-0.353675	6.95191e-05
FBXO21	0.870776	-0.199627	6.96273e-05
ZSCAN2	0.816908	-0.291755	6.96907e-05
ZFC3H1	0.793196	-0.334251	6.9697e-05
ZNF853	0.568441	-0.814919	7.00967e-05
PLEKHG6	0.708693	-0.496767	7.03767e-05
ICAM4	1.63677	0.710851	7.03839e-05
OCA2	0.459533	-1.12176	7.04554e-05
RGS19	1.48517	0.570626	7.06872e-05
E2F2	1.36387	0.44771	7.08663e-05
RPS6KA1	1.24234	0.31306	7.09931e-05
NEBL	0.709834	-0.494447	7.11063e-05
CDC45	1.35118	0.434222	7.13377e-05
STRBP	0.845867	-0.241498	7.13574e-05
CDH17	0.598705	-0.740082	7.14687e-05
NCOA6	0.788047	-0.343646	7.151e-05
PABPC1L	0.585455	-0.77237	7.15297e-05
NAT2	0.523878	-0.932698	7.18436e-05
RPN1	1.13061	0.177099	7.18522e-05
EIF5AL1	1.23484	0.30433	7.24907e-05
SLC10A4	0.632965	-0.659802	7.25118e-05
C7orf36	0.71612	-0.481727	7.26122e-05
RIMBP3C	1.46099	0.546943	7.26122e-05
PPP4C	1.20251	0.266044	7.27302e-05
ZNF711	0.727797	-0.458391	7.30625e-05
IFITM2	1.44203	0.528102	7.31657e-05
ZNF193	0.804901	-0.313116	7.34501e-05
RPL23	0.777179	-0.363682	7.34501e-05
KLRG1	1.54433	0.626981	7.34503e-05
CYTL1	1.70079	0.766206	7.37508e-05
SPDYE3	0.837776	-0.255364	7.39036e-05
[truncated: 5,055 more rows]

## Sheet: DLBC
id	fc	log2fc	padj
TAP1	2.8958	1.53396	4.95594e-07
PSTPIP2	10.3939	3.37767	2.84742e-05
WARS	4.0712	2.02545	0.00164594
PRF1	5.58032	2.48035	0.0019767
STAT1	3.75992	1.9107	0.0019767
GBP5	9.66644	3.27298	0.0019767
IFIT3	5.81637	2.54012	0.0019767
IL10RB	1.79228	0.841793	0.00203472
ANKRD22	10.5547	3.39982	0.00203472
BATF2	5.49256	2.45748	0.00203472
CASP5	12.6742	3.66382	0.00203472
GBP1	7.35016	2.87778	0.00203472
FBXO6	2.65702	1.40981	0.00203472
TLR8	8.26923	3.04775	0.00203472
IL31RA	12.1032	3.59732	0.00217933
SIGLEC1	16.0124	4.00112	0.00229512
PTGER2	3.98139	1.99327	0.00237703
OASL	4.87615	2.28574	0.00265484
FAM26F	5.41445	2.43682	0.00310054
CXCL9	10.7443	3.4255	0.00313317
BAK1	1.56918	0.650008	0.0032838
PML	1.75063	0.807878	0.0032838
SECTM1	5.0533	2.33723	0.0032838
IFIT2	3.79257	1.92317	0.00329614
LOC400696	9.50654	3.24892	0.00329614
ITGBL1	0.0586645	-4.09137	0.00329614
C1orf38	2.99674	1.5834	0.00329614
CXCL10	7.08763	2.8253	0.00329614
LOC150568	0.0590741	-4.08133	0.00332591
CXCL11	7.72555	2.94964	0.00347057
TAPBPL	2.04239	1.03026	0.00347057
MLF1IP	0.396753	-1.33369	0.00353384
GZMH	5.21818	2.38355	0.0036301
APOL3	3.61493	1.85397	0.0036301
CCL8	11.1495	3.47891	0.00379357
IDO1	11.3575	3.50558	0.0041864
GBP4	4.57052	2.19236	0.0041864
APOL2	2.13162	1.09195	0.00457833
IRF1	2.99865	1.58431	0.00459356
TRIM21	1.76603	0.820512	0.00459356
GBP2	3.56957	1.83575	0.00506865
LOC400759	6.02975	2.5921	0.00541848
SPPL2A	1.99954	0.999667	0.00633191
HSD11B1	6.3	2.65535	0.00633191
OAS3	5.47013	2.45158	0.00652495
FGL2	3.93734	1.97722	0.00784634
MPO	4.4327	2.14819	0.00795512
UBE2L6	1.99183	0.994098	0.00863772
LACTB	2.10964	1.077	0.00936274
HPCA	0.424095	-1.23754	0.00936274
JAKMIP1	5.6557	2.49971	0.00945055
FCGR1A	10.1504	3.34347	0.00953733
C16orf80	0.691587	-0.532017	0.00953733
SLAMF7	6.27637	2.64993	0.00953733
NCF2	3.56773	1.83501	0.00953733
FPR2	10.023	3.32524	0.00953733
RTP4	3.03579	1.60207	0.00953733
GRIN3A	4.51344	2.17423	0.00953733
SKA2	0.618158	-0.693953	0.00953733
NRG2	5.10465	2.35181	0.00953733
MRPS36	0.680911	-0.554461	0.00953733
MT1M	14.0012	3.80748	0.00987178
PTGIS	0.0935624	-3.41793	0.0100841
LAP3	2.03427	1.02451	0.0101852
CCR5	4.81677	2.26806	0.0111488
GAK	1.45252	0.538557	0.0111488
PTMA	0.644488	-0.633776	0.0111488
FAM157B	2.52318	1.33524	0.0111488
FCGR1B	8.29467	3.05218	0.0111488
C14orf142	0.661191	-0.596862	0.0111488
SERPING1	3.38516	1.75922	0.0111488
C2	3.83098	1.93771	0.0111488
IFNG	7.48872	2.90472	0.0111488
ABCD1	1.96698	0.975979	0.0111488
PTS	0.513641	-0.961167	0.0117674
COPS7B	0.746314	-0.422145	0.0117767
SCARF1	2.41554	1.27234	0.0120319
SLC31A2	3.23167	1.69228	0.0120319
OPTN	1.95553	0.967557	0.0120319
SUB1	1.82884	0.87093	0.0120319
CP	18.3134	4.19482	0.0120319
CCND1	2.01484	1.01067	0.0120319
HOXA3	0.247333	-2.01547	0.0120319
LAG3	5.68041	2.506	0.0120319
PODN	0.195813	-2.35245	0.0120319
DDX58	2.32645	1.21813	0.0120319
CXCR6	5.10433	2.35172	0.0120597
SLC27A2	6.74912	2.7547	0.0123386
HTR3A	0.0308087	-5.02052	0.0123386
AFF2	0.0669828	-3.90007	0.0123386
PIK3R5	3.98758	1.99551	0.0123386
HMGN1	0.488636	-1.03317	0.0123386
EBF1	0.331223	-1.59413	0.0123386
APOL6	3.1489	1.65485	0.0123386
CETN3	0.651935	-0.617201	0.0123386
FCGR1C	7.64416	2.93436	0.0123386
TMEM63B	1.7255	0.787018	0.0123386
H3F3A	0.561586	-0.832422	0.0123386
ST3GAL5	1.86928	0.902484	0.0123386
DRAM1	2.74035	1.45436	0.0123386
G6PD	1.55988	0.641438	0.0123386
MT1H	53.0543	5.7294	0.0123518
CTSS	2.40791	1.26778	0.0123518
MAPKAPK3	2.03186	1.0228	0.0123518
PPP2R2B	5.55501	2.47379	0.0123518
STX11	2.25428	1.17267	0.0123518
SMYD3	0.459726	-1.12115	0.0123518
GNPDA1	1.80951	0.855597	0.0123518
TPRKB	0.577153	-0.792974	0.0123518
CCL4	4.20265	2.0713	0.0123518
MT1G	30.2501	4.91887	0.0123518
C15orf58	1.57737	0.657518	0.0123518
TNFSF10	2.69463	1.43009	0.0123518
LILRB2	4.7172	2.23793	0.0123518
IDO2	6.64185	2.73159	0.0123518
HMGB2	0.557391	-0.843237	0.012546
ITGB3BP	0.620967	-0.687411	0.0127556
APOL4	4.79355	2.2611	0.0127556
IL27	10.5319	3.39669	0.0127556
OAS1	3.00369	1.58674	0.0127556
GPR150	3.02782	1.59828	0.0133671
FASLG	4.51205	2.17378	0.0133671
IFI44L	7.00305	2.80798	0.0135179
TNFAIP2	4.19796	2.06969	0.0137087
CSF3R	4.19472	2.06858	0.0137087
PDCD1LG2	3.692	1.8844	0.013866
HLA-E	1.73821	0.797605	0.013866
TAP2	1.92462	0.944577	0.0140565
NFAM1	3.12345	1.64314	0.0140565
GZMB	7.39781	2.8871	0.0140565
BCL2L14	8.69773	3.12064	0.0146854
XAF1	2.96683	1.56892	0.0146854
MYO1F	2.90679	1.53942	0.0146854
GNS	2.06382	1.04531	0.0148927
FAM125B	2.64831	1.40507	0.0148927
CD163	10.5983	3.40575	0.0155245
SOBP	0.339965	-1.55654	0.0158125
GPR171	5.18364	2.37396	0.0158125
HAVCR2	2.35938	1.23841	0.0159458
GLB1L2	3.69803	1.88676	0.0159458
ANXA4	1.92795	0.947067	0.0159458
GIMAP5	4.14429	2.05112	0.0159458
RBM47	2.49811	1.32084	0.0162939
GALM	2.49495	1.31901	0.0162939
ME1	3.9949	1.99816	0.0163094
CRTAM	4.192	2.06764	0.0164865
FAM124A	3.67868	1.87919	0.0164865
NTM	0.210271	-2.24968	0.0164865
SFRP4	0.069255	-3.85194	0.0164865
VSIG4	14.3312	3.84109	0.0164865
NOD2	4.2377	2.08328	0.0164865
DDX60	3.78223	1.91924	0.0164865
SPATS2L	2.0194	1.01393	0.0164865
LRRC25	2.53646	1.34282	0.0164865
IFI44	3.36476	1.75051	0.0165672
SFXN3	2.00104	1.00075	0.0165672
CLEC12A	5.00622	2.32372	0.0167488
HDAC1	0.526643	-0.925103	0.0171009
RNF157	4.19029	2.06705	0.0171009
HAPLN3	2.64391	1.40267	0.017228
LY6E	3.4798	1.799	0.0173353
NEFH	2.65798	1.41033	0.0179611
B2M	2.2077	1.14254	0.0182447
PLEKHF1	2.77592	1.47296	0.0182447
HCP5	2.14251	1.0993	0.0182447
FZD8	0.276294	-1.85572	0.0182447
RAB31	2.58026	1.36752	0.0182447
DHX58	2.2824	1.19055	0.0182447
ZC3H12C	3.13377	1.6479	0.0182447
SUMO1P3	0.688622	-0.538215	0.0182447
PILRA	4.72541	2.24044	0.0182447
HLA-F	2.2127	1.1458	0.0185066
DLL1	2.92541	1.54864	0.0186526
CSDAP1	2.53838	1.34391	0.0187788
SLC30A1	2.35415	1.23521	0.0188563
CLEC7A	2.77534	1.47266	0.0196035
CACNG3	8.0608	3.01092	0.0200048
MGC12916	4.51363	2.17429	0.0200048
CD1A	0.138895	-2.84793	0.0201689
PLSCR1	2.19875	1.13668	0.0203416
NINJ1	2.53661	1.3429	0.0203801
TBX21	4.09048	2.03227	0.0203801
ITGB7	2.30272	1.20334	0.0205566
GABRD	0.297563	-1.74873	0.0205566
PLB1	4.1576	2.05575	0.0205566
GZMA	4.17726	2.06256	0.0205566
TRPV4	4.01341	2.00483	0.0207751
MLKL	2.46745	1.30302	0.0207751
RDX	2.57297	1.36344	0.0207751
FLVCR2	2.62264	1.39102	0.0207751
SCG3	3.41002	1.76978	0.0208013
MEFV	5.91654	2.56475	0.0209532
HMGN2	0.505541	-0.984099	0.0209532
NACC2	3.43972	1.78229	0.0209532
HNRPLL	2.41596	1.2726	0.0209532
SNX10	2.48743	1.31466	0.0209532
KCNE1	6.59881	2.72221	0.0210284
CASP10	2.63016	1.39515	0.0212234
RGL1	2.68569	1.42529	0.0212234
PTPLAD2	2.78215	1.4762	0.0212234
GIMAP4	3.64399	1.86552	0.021442
MARCKSL1	0.252342	-1.98655	0.021456
RALB	1.76653	0.820922	0.0216661
ASCL1	10.9406	3.45162	0.0216661
LILRA6	7.93698	2.98859	0.0216661
APOL1	2.33341	1.22244	0.0216661
CDKN1A	2.82196	1.4967	0.0224582
TNFSF13B	2.75261	1.4608	0.0224605
NEU1	1.65358	0.725592	0.0224661
EMR1	6.79613	2.76471	0.0224661
RNF213	2.94299	1.55728	0.0225861
C1QB	6.17919	2.62742	0.0228692
CCRL2	2.84451	1.50818	0.0229728
CD97	2.45869	1.29789	0.0229728
PRKRA	0.650223	-0.620994	0.0232374
FCER1G	3.06571	1.61622	0.0233324
TMEM150B	4.64705	2.21632	0.0234926
HADH	0.549689	-0.863313	0.0238097
VGLL4	0.449949	-1.15217	0.0243292
INPP4B	4.611	2.20508	0.0244703
FOLR3	3.47482	1.79694	0.0248858
C7orf10	0.130298	-2.94011	0.0248858
KHDRBS1	0.730998	-0.45206	0.0248858
IL15RA	2.20249	1.13913	0.0248858
DKFZp761E198	1.83239	0.87373	0.0251255
C14orf4	2.10449	1.07347	0.0255209
PDZD7	3.51644	1.81412	0.0255209
STOM	2.57839	1.36647	0.0255209
IGF2BP2	2.53048	1.33941	0.0255209
CMPK2	4.0356	2.01278	0.0255209
TTC39B	4.76458	2.25235	0.0255209
HLA-H	2.12346	1.08642	0.0256617
FAM23A	2.80391	1.48744	0.0256617
GPR109B	5.32504	2.41279	0.025695
KIF19	2.83741	1.50457	0.025695
ZMYND15	4.08489	2.0303	0.0259502
TMBIM1	1.97361	0.980841	0.0261797
FLJ45445	4.18539	2.06536	0.0261797
BTN3A3	2.17056	1.11807	0.0261797
MGP	0.322804	-1.63127	0.0261797
RUFY4	5.849	2.54819	0.0261797
ACE	4.01975	2.00711	0.0261797
C1QC	4.46187	2.15765	0.0261797
RARRES3	3.58142	1.84053	0.0264864
SIRPG	4.72386	2.23997	0.0266139
BATF3	3.4477	1.78563	0.0268958
IFIH1	2.39175	1.25807	0.0269102
HK3	4.67885	2.22615	0.02716
NUCB1	1.67457	0.743794	0.02716
SLFN12L	4.92564	2.30031	0.0272204
MAP3K5	3.07908	1.6225	0.0272204
RAB38	2.48811	1.31505	0.0274047
NCRNA00161	1.69966	0.76525	0.0274147
RNF31	1.32431	0.405242	0.0274791
RWDD3	0.661701	-0.595748	0.0274791
ICAM1	2.09413	1.06635	0.0276874
IFI6	3.51838	1.81491	0.0278903
HNRNPA3	0.745585	-0.423555	0.0278903
GYG1	1.69338	0.759906	0.0281303
SPAG16	0.413602	-1.27368	0.028311
TMEM106C	0.57932	-0.787566	0.028311
LRRC33	3.05986	1.61347	0.028354
CD209	6.18568	2.62893	0.0283792
AP3S1	0.587498	-0.767343	0.0284278
GNPTAB	2.09109	1.06426	0.0287264
PORCN	2.08826	1.0623	0.0289282
SNX5	0.707499	-0.4992	0.0289434
VWA5A	2.33902	1.22591	0.0289434
DFNB59	0.515457	-0.956075	0.0289799
COMP	0.033157	-4.91454	0.029272
CRHBP	0.210876	-2.24553	0.0292947
IL18BP	2.45811	1.29755	0.0292947
LITAF	2.16474	1.1142	0.0292947
BCL7A	0.256869	-1.96089	0.0293299
LILRB3	4.11076	2.0394	0.0293299
CARHSP1	0.484351	-1.04588	0.0293299
CCR1	3.37945	1.75679	0.0293299
CPPED1	2.31218	1.20925	0.0298476
DOK2	2.69671	1.4312	0.0298476
UBASH3A	4.41455	2.14227	0.0298476
CHMP5	1.51497	0.599287	0.0298476
IFIT1	3.68538	1.88181	0.029849
SIRPA	2.40625	1.26679	0.0298638
SCARB2	1.96702	0.976012	0.0299227
LOC151162	0.398922	-1.32582	0.0301038
HSPA6	2.957	1.56414	0.0301038
GZMK	4.54537	2.1844	0.030362
THEMIS	6.71281	2.74692	0.030362
CDKN3	0.507826	-0.977595	0.0304296
TMEM106A	1.99495	0.996352	0.0304296
JAK2	2.76912	1.46943	0.0304296
CD274	8.37267	3.06569	0.0307747
VPS26B	1.64623	0.719169	0.0310297
EPSTI1	2.71867	1.4429	0.0310297
BCL6	0.433772	-1.20499	0.0315691
IGF2R	2.95796	1.5646	0.0320764
CD300C	3.30748	1.72573	0.0320764
RADIL	0.472169	-1.08262	0.0320764
RAB27A	1.79995	0.847957	0.0320764
GRAP2	4.56309	2.19001	0.0323614
C3AR1	2.59666	1.37666	0.0323614
HLA-C	1.9638	0.973649	0.0324084
OAS2	2.45199	1.29395	0.0324084
METTL9	0.678264	-0.560082	0.0324645
ALAS1	1.82864	0.870772	0.0324645
LOH3CR2A	0.456456	-1.13145	0.0326653
GLB1L3	3.62485	1.85792	0.0327087
CCL3	3.56355	1.83332	0.0327135
TTC39A	4.38175	2.13151	0.0327135
HS2ST1	0.460699	-1.1181	0.0327135
PTGER4	2.68218	1.42341	0.0327135
TMEM110	1.64739	0.720186	0.0327135
HMGB1	0.605047	-0.724881	0.0328526
VPS37B	2.95757	1.56441	0.03286
CD8A	4.63303	2.21196	0.03286
COPS8	0.798059	-0.325432	0.03286
MT1E	4.34455	2.11921	0.03286
EIF2B1	0.764927	-0.386605	0.03286
SLC8A1	2.90603	1.53905	0.03286
GMPR	3.41238	1.77078	0.03286
TMEM140	1.8494	0.887055	0.03286
KCNJ2	4.91345	2.29674	0.03286
SUCNR1	5.12685	2.35807	0.03286
NKG7	4.02817	2.01013	0.0332859
CRAT	2.26503	1.17953	0.0332859
ELN	0.19208	-2.38022	0.0333889
IFIT5	2.60756	1.3827	0.0335542
PARP9	2.46586	1.30209	0.0340726
RASD2	0.387754	-1.36679	0.0342527
HIP1R	0.332926	-1.58673	0.0342527
LOC493754	0.722557	-0.468817	0.0342527
CD14	3.10617	1.63514	0.0342527
FGFR2	0.262611	-1.929	0.0342527
NLRC4	2.04821	1.03436	0.0342527
SRGN	2.32549	1.21753	0.0342527
TTC22	5.07676	2.34391	0.0342527
IFFO2	3.00963	1.58959	0.0342527
LRFN3	2.15793	1.10965	0.0342527
C11orf45	2.26237	1.17784	0.0342527
NAGA	1.72022	0.782596	0.0342527
ETV7	3.88861	1.95925	0.0342527
C1QA	4.6235	2.20899	0.0342527
MVP	1.88053	0.91114	0.0342527
MAN2B1	1.66353	0.734246	0.0342527
RAB43	2.43115	1.28164	0.034484
ZHX3	0.607184	-0.719794	0.0351009
GLRB	0.310885	-1.68555	0.0354532
SLC45A4	1.46677	0.552638	0.0365847
IPCEF1	5.28619	2.40223	0.0366611
SLC6A12	4.29446	2.10248	0.0366611
C5orf56	2.11791	1.08264	0.0368912
FLNA	2.3093	1.20746	0.0372824
HSD3B7	2.26264	1.17801	0.0373042
VAMP5	3.22082	1.68743	0.0373042
CFLAR	2.13994	1.09757	0.0373042
MMP15	0.441117	-1.18077	0.0376255
ARL6IP5	1.57387	0.654321	0.0385273
PMS2	0.70838	-0.497404	0.0385273
STARD8	2.38118	1.25168	0.0385273
C1RL	1.93927	0.955517	0.0385273
PTPRE	2.20261	1.13921	0.0385273
C9orf109	3.89786	1.96268	0.0385273
CHST2	2.71274	1.43975	0.0385273
LDLR	2.80357	1.48727	0.0385273
CXCL16	2.77493	1.47245	0.0385273
FAR2	2.74328	1.4559	0.0385273
SSBP2	0.251476	-1.9915	0.038536
AGAP1	2.55588	1.35382	0.03895
TLR2	2.45093	1.29333	0.0390952
PLEKHG3	3.25284	1.7017	0.0394295
SLC12A7	2.00158	1.00114	0.0394295
MRPS27	0.710594	-0.492902	0.0395269
KCTD14	4.79321	2.26099	0.0401672
TMLHE	1.51824	0.602398	0.0401841
GALNS	1.41715	0.502989	0.0410129
POLH	0.65315	-0.614513	0.0410129
YAF2	0.696275	-0.522271	0.0410129
CD22	0.241081	-2.05241	0.0410129
FLCN	1.44679	0.53286	0.0411572
MMAA	1.3894	0.474464	0.0411635
ZNFX1	1.92801	0.94711	0.0412975
SH3D20	2.18455	1.12734	0.0413551
CD28	5.33465	2.41539	0.0413777
FGR	2.77966	1.47491	0.0415291
B4GALT1	2.06149	1.04368	0.0415291
ASPN	0.126311	-2.98495	0.0415533
TMEM81	0.534904	-0.902648	0.0418386
EOMES	6.32801	2.66175	0.0418448
PRELP	0.231986	-2.10789	0.0419084
MEN1	0.680498	-0.555338	0.0420117
GIMAP7	4.09105	2.03247	0.0422592
CD33	3.03608	1.60221	0.0426299
LCP2	2.74516	1.45689	0.0428206
NLRP6	4.19992	2.07036	0.0428736
IRF9	1.66032	0.731462	0.0430814
GIMAP1	2.59562	1.37608	0.0432948
RNF130	2.04394	1.03135	0.0434918
SLAMF8	2.64739	1.40457	0.0435295
NAP1L1	0.583751	-0.776574	0.0436535
GCH1	2.08122	1.05743	0.0436535
FAM64A	2.76168	1.46555	0.0439935
CMKLR1	2.23299	1.15897	0.0439935
SAMD11	0.273827	-1.86867	0.0439935
TNIK	4.48337	2.16458	0.0439935
ABCD2	4.78126	2.25739	0.0443025
TNFRSF1B	2.21386	1.14657	0.0447058
GPBAR1	2.91274	1.54237	0.044741
RNF13	1.68296	0.750997	0.044741
IGFBP3	0.361344	-1.46855	0.044741
MND1	0.388788	-1.36294	0.044798
MATN3	0.30444	-1.71577	0.0449454
NPFFR1	3.99721	1.99899	0.0449454
GK	2.3585	1.23787	0.0449454
TCN2	2.76725	1.46845	0.0450186
ATG12	0.775106	-0.367534	0.045217
SIRPB1	3.08984	1.62753	0.0454946
BRP44	0.602354	-0.731316	0.0454946
CSF1R	2.12487	1.08737	0.0456358
PHF17	0.668561	-0.580869	0.0458157
CD2	3.564	1.8335	0.0467221
LRRC3	2.21828	1.14944	0.0467221
AOX1	2.94216	1.55688	0.0469502
PARP10	1.74573	0.803832	0.0471951
DIRAS2	3.37441	1.75464	0.047456
IFNAR2	1.96808	0.976786	0.0474713
SCPEP1	2.29768	1.20018	0.0477394
KLHDC7B	2.03162	1.02263	0.0479437
SGCD	0.280137	-1.8358	0.0479437
ZNF841	2.88182	1.52698	0.0479437
FGFBP2	3.56856	1.83534	0.0482624
CRLF1	0.178963	-2.48226	0.0482624
DNAH14	3.99744	1.99908	0.0482624
PSTPIP1	2.34582	1.23009	0.0482624
ALDH1A1	4.09236	2.03293	0.0482698
RNF114	1.35133	0.434377	0.0482698
SCMH1	0.524683	-0.930482	0.0485111
CYFIP1	1.88181	0.912123	0.0485111
C9orf110	4.3609	2.12463	0.0485111
CHST11	2.3009	1.2022	0.0485111
TAPBP	1.5021	0.586981	0.0485111
KIAA1598	2.48706	1.31444	0.0485111
ZCCHC2	1.99251	0.994589	0.0486784
GLIPR2	2.1998	1.13737	0.0489076
GIMAP6	3.12584	1.64424	0.0489836
ASF1B	0.601663	-0.732973	0.0489934
DNASE1	0.448691	-1.15621	0.0492768
NDUFA5	0.707995	-0.498189	0.0492768
CTNND2	12.3087	3.6216	0.0493487
SOD2	3.22028	1.68719	0.0494938
MME	0.0976133	-3.35678	0.0494938
PRIC285	2.67157	1.41769	0.0494938
CLEC6A	5.799	2.5358	0.0494938
OGG1	0.463194	-1.11031	0.0494938
HS3ST3B1	4.53029	2.1796	0.0494938
RXRG	2.06494	1.0461	0.0496119
THEM5	3.07156	1.61897	0.0496119
PATL2	3.2886	1.71747	0.0496119
OSBPL5	2.08994	1.06346	0.0496119
CYCSP52	1.30704	0.386298	0.0497766

## Sheet: ESCA
id	fc	log2fc	padj
TAP1	4.6373	2.21328	2.16921e-39
PSMB9	5.72698	2.51778	1.87374e-31
HLA-F	6.16102	2.62317	3.95755e-23
TAP2	2.46971	1.30434	3.55287e-22
PSMB8	3.06579	1.61626	6.86001e-22
HLA-B	4.51668	2.17526	2.18644e-21
NLRC5	3.68899	1.88322	1.0548e-20
IRF1	3.66243	1.8728	3.27867e-20
HLA-E	2.59825	1.37754	3.6426e-20
KIR2DL4	7.17238	2.84245	1.34533e-19
KLRC1	6.20641	2.63376	1.84055e-19
PSMB10	3.13265	1.64738	1.95061e-19
B2M	2.8568	1.5144	7.58498e-19
HLA-C	3.48808	1.80243	1.29603e-18
GZMB	6.79023	2.76346	4.21909e-18
IDO1	20.5052	4.35792	5.37194e-18
FASLG	6.57274	2.71649	8.04536e-18
HLA-A	3.39206	1.76216	8.41005e-18
BTN3A3	3.46167	1.79147	1.01881e-17
ETV7	4.07685	2.02746	1.9533e-17
HCP5	4.10504	2.0374	2.74599e-17
PRF1	6.02665	2.59136	5.18987e-17
RARRES3	8.38774	3.06828	7.89966e-17
GZMA	8.33536	3.05924	8.06639e-17
HLA-H	3.42106	1.77444	3.58068e-16
GNLY	8.44877	3.07874	3.58545e-16
GBP1	4.62839	2.21051	4.42923e-16
UBE2L6	3.13306	1.64757	7.01841e-16
GBP4	5.83471	2.54466	1.50066e-15
IFNG	5.08105	2.34513	2.01287e-15
CCL5	6.9588	2.79884	7.70482e-15
GPR25	5.16608	2.36907	8.7274e-15
TAPBP	1.89535	0.922462	1.22318e-14
NKG7	7.29181	2.86628	1.45425e-14
APOL3	4.5108	2.17338	1.96659e-14
IFI35	2.65462	1.40851	5.33133e-14
PDCD1	5.1635	2.36835	7.17083e-14
CTSW	6.59716	2.72184	8.05005e-14
IL15RA	2.54849	1.34964	9.2185e-14
CXCL11	11.6756	3.54543	9.90794e-14
LOC400696	6.4293	2.68466	1.38014e-13
SLA2	4.65907	2.22004	1.39632e-13
PSME2	2.11604	1.08136	3.83026e-13
BTN3A1	2.78496	1.47765	4.91024e-13
SIRPG	4.89391	2.29099	4.91024e-13
EPSTI1	4.48729	2.16584	6.34678e-13
PSME1	1.86149	0.89646	1.03884e-12
APOL6	2.76181	1.46562	1.04933e-12
AIM2	12.3103	3.62179	1.69398e-12
KLRK1	5.2626	2.39577	1.79844e-12
TBX21	4.50397	2.1712	1.83603e-12
CXCR3	5.57782	2.4797	2.12345e-12
BATF2	7.0989	2.82759	2.29791e-12
LAG3	4.99021	2.3191	2.4978e-12
GBP5	7.81443	2.96614	2.67314e-12
CD8A	6.53639	2.7085	2.8249e-12
TNFSF13B	3.82594	1.93581	2.86596e-12
IL12RB1	4.64127	2.21452	3.12631e-12
ZNF683	6.29036	2.65314	3.26181e-12
SAMD9L	4.73305	2.24277	3.26181e-12
GBP2	3.08441	1.62499	3.8021e-12
KLRC3	3.91085	1.96748	3.93067e-12
CXCR2P1	8.12189	3.02182	4.42557e-12
RTP4	4.75527	2.24953	4.59438e-12
IFIT3	4.38157	2.13145	7.20219e-12
KLRC2	3.96893	1.98875	8.39692e-12
CD3D	4.52975	2.17943	8.7229e-12
XAF1	3.66896	1.87537	1.04389e-11
TRIM21	2.0025	1.0018	1.20514e-11
CD3E	4.08938	2.03188	2.23632e-11
GZMH	6.3722	2.67179	2.55894e-11
APOL2	2.34588	1.23013	2.9714e-11
ZBP1	5.75222	2.52412	2.9714e-11
APOL1	4.00726	2.00262	3.2179e-11
CXCR6	4.06953	2.02486	5.40437e-11
CD74	3.73432	1.90085	5.46039e-11
SLC15A3	3.05207	1.60979	5.46039e-11
CD7	4.0984	2.03506	5.4832e-11
CD247	3.79109	1.92261	6.13495e-11
CXCL10	8.301	3.05328	7.14621e-11
CD2	4.35483	2.12262	7.82678e-11
UBA7	2.8789	1.52552	1.15378e-10
SIT1	4.07623	2.02724	1.21984e-10
NMI	1.90301	0.928284	1.28918e-10
IL2RB	3.28337	1.71518	1.37176e-10
STAT1	2.42279	1.27667	1.41086e-10
KLRC4	3.23193	1.69239	1.48634e-10
JAKMIP1	4.23514	2.08241	1.8508e-10
TMIGD2	3.53195	1.82046	2.01454e-10
CXCL9	9.20337	3.20216	2.49125e-10
SP110	2.02079	1.01492	3.64805e-10
HLA-DRA	3.85672	1.94738	3.68213e-10
PARP14	2.07135	1.05057	4.09636e-10
CD3G	4.1856	2.06543	4.24918e-10
TAPBPL	2.18067	1.12477	4.58583e-10
ARHGAP9	3.10685	1.63545	4.70429e-10
WARS	2.95484	1.56308	5.72994e-10
BST2	4.22618	2.07935	6.16439e-10
SP100	1.80614	0.852906	6.70817e-10
HCG26	3.18236	1.6701	6.70817e-10
GPR171	4.05306	2.01901	8.12023e-10
CST7	3.22276	1.6883	8.49885e-10
CIITA	4.47831	2.16295	1.01037e-09
GIMAP2	2.99145	1.58085	1.12759e-09
CD96	3.55528	1.82996	1.43493e-09
HLA-DPA1	3.90564	1.96556	1.4515e-09
CCL4	3.71642	1.89391	1.45762e-09
TTC24	2.5148	1.33044	1.94521e-09
ZAP70	4.17235	2.06086	2.15404e-09
TRIM22	3.2455	1.69844	2.33139e-09
IL18RAP	3.8175	1.93263	2.7028e-09
ACAP1	2.90331	1.5377	3.447e-09
PATL2	3.49945	1.80713	3.46055e-09
TBC1D10C	3.28754	1.71701	3.91238e-09
UBASH3A	4.00634	2.00228	3.99672e-09
IL15	2.68868	1.4269	4.03061e-09
C5orf56	2.62059	1.38989	4.71428e-09
CORO1A	2.62462	1.39211	5.86014e-09
TIGIT	3.77412	1.91614	6.05547e-09
SMTNL1	3.29139	1.7187	6.43741e-09
HLA-DMB	3.27642	1.71212	6.97296e-09
CD244	2.98815	1.57925	7.52324e-09
BAK1	1.86129	0.896305	7.54385e-09
MIR155HG	2.80962	1.49038	7.54385e-09
ITK	3.97721	1.99176	7.71546e-09
HLA-DPB1	3.52965	1.81952	8.85476e-09
SECTM1	3.04229	1.60516	9.06554e-09
PARP12	1.78844	0.838705	9.63024e-09
PARP3	2.05283	1.03762	9.78384e-09
ITGAL	3.70912	1.89108	9.78384e-09
PTPN22	3.25403	1.70223	1.0163e-08
PML	1.9989	0.99921	1.09394e-08
OAS2	3.02658	1.59769	1.17557e-08
CTLA4	3.2918	1.71888	1.24997e-08
IFIT2	3.35254	1.74526	1.25883e-08
RASAL3	2.85264	1.5123	1.28693e-08
PYHIN1	4.12556	2.04459	1.40888e-08
ICOS	3.29521	1.72037	1.54206e-08
PTPRCAP	3.15753	1.65879	1.8347e-08
HLA-DMA	3.3725	1.75382	1.85332e-08
BTN3A2	2.38319	1.25289	2.84824e-08
SASH3	2.90014	1.53612	3.01549e-08
TARP	2.86683	1.51945	3.14408e-08
IL32	3.54319	1.82505	3.28013e-08
GPR174	3.2755	1.71172	3.28013e-08
ITGB7	2.75004	1.45945	3.28101e-08
CCR5	3.41146	1.77039	3.50081e-08
GNGT2	2.39459	1.25978	3.50081e-08
VAMP5	2.23092	1.15764	3.57649e-08
THEMIS	3.69057	1.88385	4.31859e-08
C19orf66	1.77996	0.831841	4.31859e-08
IL21R	3.44681	1.78526	4.71879e-08
FAM26F	3.52012	1.81563	4.71879e-08
HCST	3.09182	1.62846	4.71879e-08
ODF3B	2.16635	1.11527	4.72193e-08
TRAT1	4.07292	2.02606	4.96839e-08
C1QA	3.46005	1.79079	5.10883e-08
PTPN7	3.02599	1.59741	5.11152e-08
LCK	3.4494	1.78635	5.92948e-08
KLRD1	3.97767	1.99192	6.01399e-08
CD48	3.21078	1.68292	6.01399e-08
C1QC	3.27582	1.71186	6.32062e-08
C17orf66	1.83042	0.872171	7.06353e-08
WAS	2.53675	1.34298	7.57268e-08
MICB	2.7128	1.43978	8.91667e-08
DOK2	2.87641	1.52427	9.1514e-08
C1QB	3.48541	1.80133	9.77502e-08
CMPK2	3.0346	1.60151	9.8099e-08
LAP3	1.7951	0.844061	9.88614e-08
ISG20	2.71366	1.44024	1.15678e-07
XCL2	2.55349	1.35247	1.19421e-07
SP140	3.6419	1.86469	1.2143e-07
PTPRC	3.10111	1.63278	1.33928e-07
IL9R	2.75397	1.46151	1.53115e-07
SH2D1A	3.60673	1.85069	1.88429e-07
DDX60	2.59272	1.37447	1.88429e-07
IFITM1	2.9369	1.5543	1.92046e-07
SLAMF6	3.79389	1.92368	1.98689e-07
HLA-DRB1	3.86851	1.95178	2.05333e-07
IRF9	1.9058	0.930399	2.07734e-07
CYTH4	2.51442	1.33023	2.20862e-07
ABI3	2.37299	1.24671	2.24703e-07
NCF4	2.32723	1.21861	2.83473e-07
SLC29A4	0.239874	-2.05965	3.61502e-07
OASL	3.69348	1.88498	3.71229e-07
LOC606724	2.10055	1.07077	3.7413e-07
GPR132	2.52339	1.33536	4.24086e-07
CD226	2.54121	1.34552	4.52543e-07
SELPLG	2.52848	1.33827	4.52543e-07
MYO1G	2.54644	1.34848	4.66729e-07
PARP9	1.84959	0.887202	5.45436e-07
CYTIP	2.60761	1.38273	6.32136e-07
HAVCR2	2.77835	1.47423	6.39466e-07
NCR1	2.20614	1.14152	6.79984e-07
SH2D2A	2.15635	1.10859	6.91633e-07
LILRP2	2.63671	1.39874	6.91916e-07
SLFN12L	2.4756	1.30778	7.34511e-07
CD300A	2.4713	1.30527	8.47762e-07
C19orf38	2.38953	1.25673	8.47762e-07
MMP25	2.27004	1.18271	9.17878e-07
CD52	2.83357	1.50262	9.39898e-07
LOC100188949	2.70901	1.43777	9.53553e-07
GPR65	2.42217	1.2763	9.65361e-07
P2RY10	3.2664	1.7077	9.65361e-07
IFIH1	2.10901	1.07657	9.65361e-07
PLSCR1	1.7734	0.826521	9.7625e-07
ZNFX1	1.70139	0.766716	9.7625e-07
CRTAM	3.23591	1.69417	9.79869e-07
CD53	2.72654	1.44707	1.01368e-06
CXCL13	5.81745	2.54039	1.01905e-06
MYO1F	2.46318	1.30052	1.04827e-06
IFI27	3.22957	1.69134	1.08768e-06
FBXO6	2.07449	1.05276	1.21958e-06
IL10RA	2.7365	1.45233	1.24109e-06
CD8B	4.17485	2.06172	1.31297e-06
UBD	7.35222	2.87818	1.33399e-06
TNFRSF1B	2.43915	1.28638	1.34708e-06
MLKL	1.68613	0.753715	1.36604e-06
LILRB1	2.74654	1.45761	1.36618e-06
FYB	3.10893	1.63642	1.3697e-06
GSDMD	1.73176	0.792239	1.55191e-06
OGFR	1.43991	0.525983	1.60404e-06
TNFRSF14	2.31536	1.21123	1.68148e-06
RNF213	1.84186	0.881165	1.68992e-06
SNX20	2.48609	1.31388	1.68992e-06
CD80	2.60112	1.37913	1.71631e-06
SPN	2.7017	1.43387	1.76961e-06
LILRB5	3.07918	1.62255	1.77498e-06
TAGAP	2.66931	1.41647	1.85866e-06
TMEM229B	3.4605	1.79098	2.08208e-06
SAMSN1	2.44598	1.29041	2.12258e-06
CD6	2.77467	1.47232	2.27932e-06
NCF1	2.66637	1.41487	2.47942e-06
CASP1	2.47615	1.3081	2.61895e-06
LCP2	2.32157	1.2151	2.61895e-06
GBP3	2.67425	1.41914	2.73741e-06
DDX60L	2.1605	1.11136	2.87712e-06
FCER1G	2.50219	1.32319	2.87881e-06
TRANK1	1.92096	0.941825	2.91419e-06
APOB48R	2.24627	1.16753	2.91904e-06
IFI30	2.03304	1.02364	2.95459e-06
CMKLR1	2.53441	1.34165	3.1485e-06
APOL4	2.66233	1.41269	3.18525e-06
CD300LF	2.61285	1.38563	3.24569e-06
PARP15	3.1894	1.67328	3.32109e-06
ARHGDIB	1.9482	0.96214	3.32109e-06
NLRC3	2.28106	1.1897	3.32162e-06
BATF	3.0609	1.61396	3.65023e-06
SLA	2.53877	1.34413	3.74502e-06
LPXN	2.04034	1.02881	3.90787e-06
GFI1	2.49709	1.32025	3.93877e-06
LILRB2	2.5483	1.34953	3.95867e-06
KIAA0748	2.78951	1.48001	3.98068e-06
IFI44	2.82681	1.49918	4.11893e-06
BIN2	2.40909	1.26849	4.21016e-06
GZMM	2.70242	1.43425	4.26284e-06
HLA-DQB1	3.89217	1.96057	4.27098e-06
IFIT5	1.76706	0.821349	4.48573e-06
GZMK	4.42201	2.1447	4.89483e-06
IRF7	2.26499	1.17951	4.95951e-06
ICAM1	2.50652	1.32569	5.25777e-06
LOC100233209	2.34101	1.22713	5.35051e-06
OAS3	1.97168	0.979423	5.42421e-06
MVP	1.82638	0.868988	5.65597e-06
2022-09-01	2.20752	1.14243	5.72073e-06
LAPTM5	2.28633	1.19304	6.06622e-06
IFI44L	4.16494	2.0583	6.52983e-06
IL18BP	2.05462	1.03887	6.57004e-06
SIGLEC10	2.62046	1.38982	6.5999e-06
NCKAP1L	2.6238	1.39166	6.8924e-06
TYROBP	2.56517	1.35905	6.89444e-06
TMEM149	1.81668	0.861308	7.16839e-06
IL2RG	3.44364	1.78393	7.75918e-06
LTA	2.3632	1.24074	8.09597e-06
TRIM69	2.08499	1.06004	8.38021e-06
LCP1	2.52303	1.33516	8.80086e-06
OAS1	2.27542	1.18613	9.17146e-06
SPAST	0.678663	-0.559234	1.04767e-05
GIMAP5	2.29153	1.19631	1.05053e-05
ACSL5	5.09806	2.34995	1.09358e-05
ISG15	2.77225	1.47106	1.19985e-05
CASP7	1.59726	0.675602	1.23096e-05
S1PR4	2.64009	1.40058	1.26167e-05
KMO	2.34019	1.22662	1.32342e-05
EHD1	1.61045	0.687465	1.32431e-05
GPR82	2.13692	1.09554	1.33976e-05
ZNF831	3.35066	1.74445	1.40554e-05
FERMT3	2.3363	1.22423	1.40554e-05
SRGN	2.30919	1.20739	1.50913e-05
RNASE6	2.45437	1.29535	1.50913e-05
CCR1	2.40345	1.26511	1.57591e-05
EVI2B	2.44338	1.28888	1.61226e-05
CD4	2.24241	1.16505	1.63592e-05
C11orf21	2.30541	1.20502	1.63592e-05
GRAP2	2.68575	1.42533	1.68508e-05
RUFY4	3.06196	1.61446	1.72123e-05
CD37	2.33459	1.22317	1.75914e-05
APOBEC3H	2.3383	1.22546	1.93795e-05
NUB1	1.44831	0.534374	1.96963e-05
SH2D1B	2.72617	1.44687	1.96963e-05
MAP4K1	2.85073	1.51133	2.00884e-05
SCML4	3.50008	1.80739	2.01491e-05
C19orf28	1.51919	0.6033	2.04015e-05
GVIN1	2.74477	1.45669	2.12311e-05
FGD2	2.23427	1.15981	2.12311e-05
SAMD3	3.15001	1.65536	2.21902e-05
CD27	3.08568	1.62559	2.21902e-05
TIFAB	2.54716	1.34889	2.27755e-05
SLAMF1	2.48048	1.31062	2.30778e-05
CFB	4.5839	2.19657	2.41459e-05
TRIM34	1.6965	0.762559	2.64325e-05
GIMAP4	2.10107	1.07112	2.64325e-05
PRKCB	2.71357	1.44019	2.6944e-05
LST1	2.40005	1.26306	2.75472e-05
HLA-DQA1	3.32519	1.73344	2.75472e-05
PARP10	1.60401	0.681686	2.89401e-05
RBCK1	1.46022	0.546189	2.89401e-05
TLR3	2.37147	1.24578	2.89401e-05
CARD16	2.02472	1.01772	2.91416e-05
NCR3	2.24104	1.16417	3.10348e-05
C16orf54	2.8039	1.48744	3.11503e-05
LRRC25	2.17948	1.12398	3.11503e-05
RHOH	2.48328	1.31225	3.17082e-05
SPI1	2.26379	1.17874	3.20296e-05
DOCK2	2.6579	1.41028	3.20296e-05
IL2RA	2.5273	1.3376	3.20296e-05
SLAMF7	3.24372	1.69765	3.20296e-05
LAIR1	2.32124	1.2149	3.33269e-05
CD209	2.56432	1.35858	3.33269e-05
MYO7A	2.56864	1.361	3.33269e-05
CTSS	2.67507	1.41958	3.33269e-05
IKZF1	2.52022	1.33355	3.33269e-05
RSAD2	3.06202	1.61449	3.33269e-05
LGALS9	2.29009	1.1954	3.40316e-05
SIGLEC1	3.0012	1.58554	3.47005e-05
MPEG1	2.40994	1.269	3.492e-05
ZNF80	2.30266	1.2033	3.58787e-05
FCGR3A	2.82081	1.49611	3.58787e-05
HCLS1	2.21506	1.14734	3.62472e-05
TLR8	2.83038	1.501	3.62472e-05
GPSM3	1.94463	0.959496	3.79429e-05
ARHGAP15	2.41972	1.27484	3.86001e-05
SLAMF8	2.39563	1.2604	3.91314e-05
MS4A6A	2.40944	1.2687	3.96843e-05
CLEC4A	2.04849	1.03456	3.97129e-05
GPR18	2.02159	1.01549	4.02823e-05
ACP5	2.015	1.01078	4.24562e-05
STAT5A	1.87746	0.908785	4.26023e-05
PSTPIP1	2.11351	1.07964	4.26023e-05
PRIC285	1.8442	0.882998	4.69086e-05
PLA2G7	2.29787	1.20029	4.72216e-05
REC8	2.21201	1.14536	4.78625e-05
ZMYND15	2.29766	1.20017	5.1804e-05
GUK1	1.39618	0.481483	5.18233e-05
C2	2.68292	1.4238	5.19089e-05
TYMP	2.40149	1.26393	5.40162e-05
HERC6	2.27931	1.1886	5.48091e-05
IL7	2.38005	1.25099	5.48091e-05
AMICA1	2.60866	1.38331	5.48779e-05
IFI6	2.85013	1.51103	5.53664e-05
CD274	2.5736	1.36379	5.53664e-05
NFAM1	2.0691	1.04901	5.56278e-05
FAS	1.81467	0.859708	5.56278e-05
IFITM3	1.85653	0.892608	6.01723e-05
SAMHD1	1.95379	0.966272	6.1626e-05
NCF1C	2.85373	1.51285	6.16519e-05
TNFAIP8L2	2.09961	1.07012	6.48866e-05
IRF4	3.07009	1.61828	6.50501e-05
C2orf85	1.77528	0.828046	6.59981e-05
LILRB4	2.62905	1.39454	6.59981e-05
RGS18	2.2319	1.15827	6.59981e-05
KIR3DL1	1.79543	0.844331	6.63927e-05
STAT4	2.31113	1.2086	6.68743e-05
C1orf162	2.12414	1.08688	7.08388e-05
MEFV	2.77975	1.47496	7.42378e-05
FCRL6	2.35392	1.23507	7.44141e-05
PARVG	2.28594	1.19279	7.53971e-05
ABCD2	2.58039	1.36759	7.57821e-05
DPYD	2.6018	1.37951	7.57821e-05
AIF1	2.22121	1.15134	7.7461e-05
MUC16	7.47667	2.9024	7.94111e-05
KLRB1	3.0774	1.62171	8.48809e-05
TRAF3IP3	2.15514	1.10778	8.72839e-05
FLT3LG	1.78336	0.8346	8.97431e-05
FCRL3	3.27819	1.7129	9.47018e-05
CLEC4E	2.90517	1.53862	9.47018e-05
FREM2	0.110474	-3.17822	9.48182e-05
PARP8	1.7834	0.834634	9.50076e-05
C14orf73	3.77884	1.91794	0.00010155
KIR2DS4	1.73722	0.79678	0.000109372
TCIRG1	1.676	0.74502	0.000116344
EML5	0.44765	-1.15956	0.000116344
ANKRD58	1.95006	0.963517	0.000122805
GMFG	1.87263	0.905063	0.000126777
FCGR1A	2.39901	1.26244	0.00012927
LILRA3	2.68195	1.42328	0.000132157
CD97	2.3461	1.23027	0.000133668
LOC388692	1.87451	0.906513	0.000133911
SEC16B	2.6769	1.42057	0.000143917
EFHD2	1.61	0.687063	0.000155084
HSPC159	0.577	-0.793357	0.000164829
FBN3	0.187478	-2.41521	0.000164829
TBXAS1	2.23794	1.16217	0.000171007
FAM113B	2.01956	1.01404	0.000173463
LILRB3	2.18107	1.12504	0.000174355
CD86	2.18483	1.12752	0.000175328
LAIR2	2.68218	1.42341	0.000183187
PTK2B	1.64849	0.721146	0.00018628
FAM168B	0.72534	-0.463271	0.000186816
PRKG2	0.407136	-1.29642	0.000188607
MX1	2.43443	1.28358	0.000188607
EVI2A	2.00658	1.00474	0.000194439
GIMAP1	2.01464	1.01052	0.000198823
NLRP3	2.2623	1.17779	0.000199261
HLA-DRB6	4.03472	2.01247	0.000208823
IGSF6	2.00036	1.00026	0.000208823
SLC22A3	3.07682	1.62144	0.000213331
COTL1	1.85655	0.892622	0.000218733
ATP8B4	1.99698	0.997821	0.000221185
TREX1	1.53064	0.614135	0.00022174
PLEK	2.24709	1.16806	0.00023384
C3AR1	2.17692	1.12229	0.000234231
TRIM5	1.51635	0.600599	0.000243368
RPS6KA1	1.48195	0.567494	0.000243744
CD72	2.09463	1.0667	0.000248959
CCL4L2	2.88824	1.53019	0.000249674
CYBB	2.11488	1.08057	0.000249674
TNFRSF9	2.22632	1.15466	0.000250492
PIK3R5	2.212	1.14535	0.00025057
CD14	2.02271	1.01629	0.000250943
IKZF3	3.23028	1.69166	0.000256344
PREPL	0.719474	-0.474985	0.000284393
FPR3	2.29628	1.1993	0.000286053
NECAP2	1.28032	0.356506	0.000287006
CXorf21	1.96586	0.97516	0.000293735
FAM78A	1.82109	0.864805	0.000294135
NCF1B	2.30081	1.20214	0.000296494
APOBEC3G	2.38245	1.25245	0.000297539
SHISA5	1.31046	0.39007	0.000297539
TET3	0.64964	-0.622287	0.000302605
LY9	2.81081	1.49098	0.000306678
DTX2	1.58385	0.663438	0.000311828
MPPED1	0.277017	-1.85195	0.000340179
POU6F2	0.264334	-1.91957	0.00034459
ITGB2	2.26039	1.17657	0.00034796
FAIM3	2.07149	1.05067	0.000350713
CASP5	3.26637	1.70769	0.000355319
JAK2	1.94583	0.960389	0.000362305
DTX3L	1.52879	0.612391	0.000373354
TMEM150B	3.45927	1.79047	0.000379018
FMNL1	1.78583	0.836597	0.000382134
SPRED2	0.694379	-0.526204	0.000382134
CCRL2	2.43576	1.28437	0.000383006
BTK	2.30511	1.20484	0.000385026
CD84	2.44338	1.28888	0.000385188
PDCD1LG2	2.27358	1.18497	0.00038822
GMCL1	0.681422	-0.553379	0.000400886
IFNGR1	1.4492	0.535259	0.000404733
KIR2DL1	1.62783	0.702948	0.000405071
SYTL3	1.80006	0.848048	0.000406478
CCL8	2.83853	1.50514	0.000419181
MNDA	2.13702	1.0956	0.000427452
CASP4	1.65412	0.726062	0.000428371
LAX1	2.69607	1.43086	0.000434393
C5orf20	2.50662	1.32574	0.000439855
STXBP4	0.675756	-0.565425	0.000446363
FLI1	1.79196	0.841536	0.000446427
TRAFD1	1.35112	0.434157	0.000456612
HMHA1	1.55608	0.637915	0.000462509
CD5	2.51822	1.3324	0.000472722
MAGEA1	0.138602	-2.85098	0.000479053
TNFRSF4	1.87872	0.90975	0.000481281
LSP1	1.96788	0.976645	0.000481456
GIMAP6	1.93653	0.953474	0.00049134
RNF19B	1.52303	0.60694	0.000495708
SLC6A12	2.33677	1.22452	0.000500044
DNMT3A	0.617764	-0.694872	0.000500044
ADORA3	2.14318	1.09975	0.000500044
HLA-DRB5	3.29039	1.71826	0.00050657
RAB6B	0.393475	-1.34565	0.000515508
SERPINB9	1.94078	0.95664	0.00052402
SP140L	1.59333	0.672045	0.00052402
C5orf39	1.86004	0.89533	0.000526533
HLA-G	2.90536	1.53872	0.000528703
P2RY13	2.36744	1.24333	0.000532664
GNAT2	0.615389	-0.70043	0.000555235
INPP5D	2.1979	1.13612	0.000560834
CTRL	1.58873	0.667876	0.000564834
PLAUR	1.83833	0.8784	0.000567207
CD180	2.24752	1.16834	0.000579582
CCL3	2.32404	1.21664	0.00058149
HSH2D	2.72422	1.44584	0.000586808
TNIP1	1.37263	0.456948	0.000586808
CHRM3	0.414544	-1.2704	0.00059362
ICK	0.587465	-0.767424	0.000601836
AKNA	1.67247	0.741977	0.000601836
ZNF704	0.386141	-1.3728	0.000601836
FAM20B	0.702429	-0.509575	0.000603743
FAM69B	0.526721	-0.92489	0.000650643
ITGAE	1.50657	0.591265	0.000659827
RCSD1	1.99335	0.995197	0.000664841
IDO2	1.95579	0.967754	0.000670417
ARHGAP30	1.73347	0.793664	0.000673363
KIR3DX1	1.42944	0.515445	0.000673507
MS4A7	2.13798	1.09625	0.000676488
CECR1	2.21931	1.15011	0.000695696
OTX1	0.539816	-0.88946	0.000700018
FAM171A2	0.421891	-1.24506	0.000704871
CSF3R	2.32948	1.22001	0.000728184
STAT2	1.46886	0.554699	0.000735187
KIR2DL3	1.66804	0.738153	0.000751128
TRIM37	0.739893	-0.434612	0.00075824
STAU2	0.711924	-0.490204	0.000760474
PIGN	0.690792	-0.533678	0.000767748
CSF1	1.85104	0.888335	0.000796808
BTN2A2	1.64598	0.718943	0.000807764
PRKCQ	2.5782	1.36637	0.00080976
FGL2	2.54826	1.34951	0.000857986
LGALS3BP	1.60263	0.680441	0.000857986
FCRL4	2.22519	1.15393	0.000857986
HLA-DOA	2.82591	1.49872	0.000861315
SAA1	4.11815	2.042	0.000864354
TRIM14	1.48255	0.568085	0.000873264
C1orf124	0.75615	-0.403255	0.000913638
TRIM26	1.31002	0.389588	0.000919715
TMEM156	2.4264	1.27882	0.000921009
C17orf87	2.11648	1.08167	0.000928901
HK3	2.37876	1.25021	0.000998161
ZYX	1.43363	0.51967	0.000998161
USP18	1.76853	0.822549	0.00100195
FTSJD2	1.27779	0.353653	0.00101465
LAT	1.90863	0.932534	0.00102307
HLA-DOB	2.11305	1.07933	0.00103865
ADAMDEC1	2.95334	1.56235	0.0010407
GPR39	2.82815	1.49986	0.001042
CLECL1	1.95798	0.969364	0.00105719
HAPLN3	1.7785	0.830663	0.00107012
SEPX1	1.62318	0.698824	0.0010706
RAC2	1.93806	0.954613	0.00109486
FUT7	1.7882	0.838507	0.00111753
TSPAN18	0.414301	-1.27125	0.00111761
SIGLEC7	1.96112	0.97168	0.00112592
OPTN	1.41531	0.501119	0.00112812
MSI1	0.264353	-1.91946	0.00114623
ULBP1	0.396963	-1.33292	0.0011625
LAT2	1.85542	0.891743	0.00116709
LILRA6	2.0772	1.05464	0.00117219
DDX58	1.75624	0.812491	0.00117489
CD200R1	2.09401	1.06627	0.00117497
NEURL3	2.7144	1.44064	0.00118132
OSCAR	1.89417	0.921564	0.00118651
DENND1C	1.58649	0.665836	0.00120935
OTOF	2.55824	1.35515	0.00121065
TSEN15	0.722352	-0.469227	0.00121372
FCGR2A	2.01376	1.00989	0.00125024
LY86	2.22871	1.15621	0.00127501
TNFSF8	2.12939	1.09044	0.00127661
ARHGAP28	0.381377	-1.39071	0.0013061
USP34	0.766603	-0.383448	0.00130803
C15orf41	0.75411	-0.407153	0.00138551
RCN2	0.69916	-0.516304	0.00139393
TNFSF10	2.07902	1.0559	0.00139491
DLX6AS	0.295861	-1.75701	0.00141054
PPP1R16B	2.12795	1.08946	0.00141054
PPA1	1.40056	0.486006	0.00141054
IPCEF1	1.95026	0.963668	0.00141876
AGAP2	1.8813	0.91173	0.00142894
RRAS	1.53446	0.617729	0.00145424
TGM2	2.53812	1.34376	0.00145564
FCGR1B	2.02464	1.01767	0.0015107
FOXP3	2.0403	1.02878	0.00151661
KIR3DL2	1.76268	0.81777	0.00153416
NKX2-1	0.350745	-1.5115	0.00154416
CD69	2.31511	1.21108	0.00156924
CCR2	2.54931	1.35011	0.00159367
SMAD5	0.745885	-0.422975	0.00159783
CD68	1.61094	0.687901	0.00161019
ITGAX	2.00494	1.00356	0.00163047
FOXL1	2.24074	1.16397	0.00163047
SLC39A10	0.644212	-0.634394	0.00164132
GPLD1	0.394638	-1.3414	0.00166673
MEF2B	1.82189	0.86544	0.00171053
IL16	1.77098	0.824547	0.00171053
FGR	1.91325	0.936023	0.00171685
TNIP3	2.60122	1.37919	0.00175277
ICAM3	1.72904	0.789968	0.00175277
BCL2L14	3.84573	1.94326	0.00177066
RHBDF2	1.51205	0.596507	0.00178471
STK10	1.47093	0.556733	0.00178471
DENND3	1.68261	0.750699	0.00178847
EBI3	2.31921	1.21363	0.00178847
C1orf38	1.79333	0.842644	0.00179384
SYVN1	1.23798	0.307993	0.00179384
GPR34	1.80525	0.852199	0.00179384
BTN2A3	1.58651	0.665859	0.00179505
SH2B3	1.53195	0.615371	0.00183826
GPR114	2.60474	1.38114	0.00185508
LANCL1	0.713553	-0.486907	0.0018583
LYL1	1.60646	0.683889	0.00190689
TNFSF12-TNFSF13	1.95717	0.968772	0.00192227
IL12RB2	3.29604	1.72073	0.00194358
IFIT1	2.46728	1.30292	0.00194538
JAK3	1.85688	0.892879	0.00194538
CRABP1	0.28549	-1.80849	0.0019502
PLA2G2D	3.50468	1.80928	0.00198994
C15orf53	1.51122	0.595715	0.00201084
PPPDE1	0.750918	-0.413272	0.00205816
CASP10	2.11671	1.08182	0.00208735
GPX1	1.42052	0.506417	0.00213355
PDZK1IP1	3.37262	1.75387	0.00213769
SELL	2.33576	1.2239	0.00214716
SOSTDC1	0.190831	-2.38963	0.00214955
GSTK1	1.47492	0.560637	0.00217673
WDFY4	2.57076	1.36219	0.00217879
FAM171B	0.527239	-0.92347	0.00220322
USF1	1.27366	0.348986	0.0022048
HSD3B7	1.64731	0.720108	0.00221415
TMC8	1.79864	0.846907	0.0022148
RNF2	0.7339	-0.446345	0.00223321
EMR4P	1.89304	0.920703	0.00225752
PTPN6	1.41922	0.505096	0.00227482
SBNO1	0.765628	-0.385285	0.00228825
GPR55	2.02167	1.01555	0.00233753
SERPING1	2.09843	1.06931	0.00236339
BAT5	1.3306	0.412077	0.00240369
DBH	1.95463	0.966892	0.00248601
C19orf35	1.66181	0.732754	0.002534
GIMAP7	1.94182	0.95741	0.00254679
TMEM106A	1.72507	0.786657	0.00256049
ALS2	0.79834	-0.324926	0.00256584
FRAS1	0.318748	-1.64951	0.00257947
FPR2	2.32839	1.21933	0.00257947
B4GALNT4	0.203212	-2.29894	0.00257947
NEDD4L	0.617096	-0.696434	0.00258095
CEBPE	1.55775	0.639462	0.0026424
SAA4	3.08381	1.62471	0.00265229
GLT25D2	0.315622	-1.66373	0.00269632
ALOX5AP	1.88466	0.914303	0.0027309
KIAA1324L	0.380321	-1.39471	0.0027309
TTC16	1.54004	0.622966	0.00273173
FAM10A4	0.773422	-0.370673	0.00275795
PLCB2	1.85594	0.892154	0.00281132
PHF11	1.40006	0.485489	0.00281597
LOC285830	1.80675	0.853395	0.00281597
ETS1	1.6617	0.732658	0.00281597
PSMA5	1.28779	0.364893	0.00283758
MOV10	1.39417	0.47941	0.00284199
CLIC5	3.37554	1.75512	0.00286137
SOD2	1.64308	0.716401	0.0028971
ARL15	0.682202	-0.551729	0.00290391
C10orf78	1.48545	0.570904	0.00290391
ACY3	3.09	1.62761	0.00290868
LYSMD2	1.45077	0.536816	0.00291301
PRRG3	0.500608	-0.998246	0.00291669
SAA2	3.7545	1.90862	0.00294567
SCO2	1.57049	0.651212	0.00298403
CXCL16	1.60985	0.686931	0.00298933
RAC3	0.492324	-1.02232	0.00301663
IL29	2.03362	1.02405	0.00301988
CD40LG	2.36978	1.24476	0.00302432
PLEK2	1.96877	0.977291	0.00307019
MS4A14	1.95601	0.967912	0.00308674
FZD3	0.576644	-0.794248	0.00308674
ARFRP1	1.29428	0.372146	0.00309013
MLLT11	0.401315	-1.31719	0.00312067
DOCK10	1.89585	0.922844	0.00313163
ODC1	0.479078	-1.06167	0.0032133
DYNC1I1	0.363435	-1.46023	0.00325215
KLHDC7B	3.75379	1.90835	0.00325215
USP13	0.610906	-0.710978	0.00325215
C14orf162	0.41298	-1.27586	0.00329383
SYN2	0.303618	-1.71967	0.00331156
HEATR5B	0.814979	-0.295165	0.00334578
FBXO21	0.813202	-0.298313	0.00334578
CBX1	0.641077	-0.641431	0.00338662
PGAP1	0.6035	-0.728574	0.00339204
AKAP14	1.52307	0.60698	0.00339204
ARRDC5	1.88736	0.916371	0.00345046
PSD3	0.566455	-0.819967	0.00346577
TNFRSF6B	2.44232	1.28826	0.00347126
PAK7	0.315481	-1.66437	0.00355853
ATAD2B	0.776439	-0.365056	0.00356167
C17orf60	1.87781	0.909052	0.00356167
SMARCA1	0.519267	-0.945452	0.00361052
IL4I1	1.79033	0.840222	0.00367281
DHX40	0.746909	-0.420995	0.00367281
BTLA	2.24658	1.16773	0.0036768
LRP6	0.662611	-0.593766	0.00368698
POU2F2	1.70586	0.770499	0.00369155
RAB33A	1.60271	0.680515	0.00369238
CBX2	0.460667	-1.1182	0.00371551
FECH	0.641158	-0.641248	0.00372573
DHX57	0.775941	-0.365982	0.00373265
CD163L1	2.03888	1.02778	0.00374924
RGS10	1.46002	0.545984	0.0037537
TAF1B	0.726316	-0.461332	0.00377794
TRIM38	1.43028	0.516294	0.00377794
MGC29506	3.09313	1.62907	0.00377794
SV2A	0.441562	-1.17931	0.00379698
CD79B	2.30778	1.20651	0.00385968
LOC400759	2.52203	1.33459	0.00385968
MDM2	0.630375	-0.665718	0.00385968
MYEF2	0.335607	-1.57516	0.0038732
KCNA3	2.33735	1.22487	0.0038732
C20orf177	0.695217	-0.524465	0.00388492
TMEM219	1.33298	0.41466	0.00388492
GPR98	0.278887	-1.84225	0.00388492
CLTCL1	0.491114	-1.02587	0.00390515
AOAH	2.43712	1.28518	0.00390515
XPOT	0.699438	-0.515732	0.0039102
GPC3	0.223689	-2.16043	0.00395762
FUT1	0.593265	-0.75325	0.0039678
UNC93B1	1.54915	0.631477	0.00403426
FITM1	1.40987	0.495566	0.00403805
GAB3	1.7133	0.776777	0.0040525
GSTA4	0.466068	-1.10139	0.0040525
BRAF	0.75535	-0.404783	0.0040525
C9orf167	2.57415	1.36409	0.00407583
SQRDL	1.57958	0.659538	0.00408248
CXorf65	1.79259	0.842046	0.00408248
DOK3	1.69111	0.757973	0.00410205
MYEOV	3.68255	1.8807	0.00416209
SLC6A4	0.34225	-1.54688	0.00418146
PIK3CG	2.16355	1.1134	0.00419494
IRF2	1.26525	0.339418	0.00424792
RAB3D	0.657824	-0.604225	0.00426796
STAB1	1.77197	0.825353	0.00434389
IGFBP2	0.409454	-1.28823	0.00434441
FHL2	1.62142	0.697261	0.00435634
PPP1R2P1	1.72479	0.78642	0.00437846
SFRS13B	0.47647	-1.06954	0.00441324
LRRC58	0.721128	-0.471674	0.00445745
MOCOS	1.76074	0.816184	0.00446769
ABCC4	0.598528	-0.740509	0.00447525
SLC35E3	0.669946	-0.577883	0.00456968
NUBP1	1.28237	0.358813	0.00458743
MS4A4A	2.09076	1.06403	0.00459414
LILRA5	1.93161	0.949805	0.00460533
TINAGL1	1.78104	0.832717	0.0046231
HDAC9	2.31709	1.21232	0.00466202
CSF1R	1.93616	0.953197	0.00466202
NFKB2	1.469	0.554836	0.00469117
TDRD7	1.41811	0.503967	0.00475111
MX2	2.11487	1.08057	0.00475216
SOCS7	0.704433	-0.505465	0.00475717
SIRPB1	1.75053	0.807795	0.00481871
PPP1CB	0.758125	-0.399493	0.0048618
FAM65B	2.11045	1.07755	0.00496736
FGF12	0.399535	-1.32361	0.00498482
ILDR2	0.423347	-1.24009	0.00500908
STX11	1.89233	0.920161	0.00500908
IZUMO1	0.54278	-0.881559	0.005071
CD79A	3.13987	1.6507	0.00507298
ENAH	0.642733	-0.637709	0.00511426
PILRA	1.74742	0.805226	0.00512366
TMEM140	1.37946	0.464102	0.00513708
CHRNB2	0.417579	-1.25988	0.00513708
TRAF2	1.35003	0.432993	0.00515713
MEI1	2.18595	1.12826	0.00515813
TNFAIP8	1.5145	0.598839	0.00518185
EMILIN3	0.412271	-1.27834	0.00521953
ST13	0.805267	-0.312461	0.00522955
CALR	1.24253	0.313277	0.00524936
TMSB10	1.46909	0.554921	0.00529515
FCGR1C	1.86118	0.896214	0.00529515
C2orf86	0.703357	-0.507671	0.00533775
FAM179A	1.81882	0.863004	0.00545184
VAMP3	1.25459	0.327221	0.00545184
SIRPB2	1.78527	0.836142	0.00549363
PTPRD	0.303741	-1.71908	0.00549363
TSHZ1	0.711676	-0.490707	0.00549839
EXOC3L	1.45811	0.544104	0.00551838
SOX6	0.444288	-1.17043	0.00557893
C10orf107	0.594182	-0.751023	0.00559091
NEB	0.349142	-1.51811	0.00559091
IFIT1B	1.39601	0.481312	0.00559213
TRIM47	1.56937	0.650181	0.00560196
GPATCH2	0.794427	-0.332014	0.00560256
CYBA	1.65868	0.73004	0.00564032
DLX6	0.234918	-2.08977	0.00564032
VAV2	1.45641	0.542415	0.005676
FAM172A	0.722916	-0.468101	0.00569742
ST8SIA4	1.71267	0.776251	0.00571531
2022-09-06	1.61085	0.68782	0.00571531
DISC1	0.579848	-0.786253	0.00571531
TMPRSS3	5.00234	2.3226	0.00572903
SLCO2B1	2.05938	1.04221	0.00573276
TFEC	2.08198	1.05795	0.00578253
FCRL5	3.16446	1.66196	0.00579099
AHCTF1	0.777399	-0.363272	0.0058051
GPR125	0.686246	-0.543202	0.00581513
LOC284900	0.731311	-0.451444	0.00588549
MED12L	0.341084	-1.5518	0.0059065
COCH	0.339603	-1.55808	0.0059318
ATP2B1	0.691224	-0.532775	0.00593441
HPS6	1.27169	0.346741	0.00602479
TMSB15A	0.427245	-1.22686	0.006033
ANKRD6	0.462145	-1.11358	0.00607682
PXN	1.41983	0.505722	0.00607892
ERAP1	1.49078	0.576063	0.00616333
DPEP2	1.91327	0.936037	0.00619569
RHOF	2.36127	1.23957	0.00619862
MAGEA9B	0.179344	-2.47919	0.00619868
PRB3	0.525852	-0.927271	0.00622377
KLHL6	1.90819	0.932202	0.00626
RASL10B	0.436726	-1.1952	0.00628158
INHBE	0.473066	-1.07989	0.006313
THOC5	0.764223	-0.387935	0.00638376
EFNB3	0.387297	-1.36849	0.0064807
2022-09-11	0.72684	-0.460291	0.00656367
SLC25A28	1.37522	0.459663	0.00658712
GOLGA6L9	0.681536	-0.553138	0.00658795
PSPH	0.62184	-0.685385	0.00659585
MATK	2.33532	1.22362	0.00659585
LIPA	1.30333	0.382199	0.00660567
SYT6	1.63946	0.713217	0.00660693
SDC2	0.579517	-0.787078	0.00661271
TXNIP	1.95789	0.969299	0.00667163
CSMD1	0.302873	-1.72322	0.00667276
ETV1	0.510441	-0.970184	0.00671072
RNASE1	1.86768	0.901245	0.00671072
SHISA6	0.415401	-1.26742	0.00671072
ZC3H12D	2.18284	1.1262	0.00671072
CDC42SE2	1.34536	0.427991	0.00674756
C10orf125	1.65417	0.726106	0.0067565
2022-09-05	0.443886	-1.17174	0.00682184
ZBTB32	1.85529	0.891644	0.0068544
AGTRAP	1.47158	0.557364	0.00688581
HRASLS	0.358212	-1.48112	0.00696103
SH3KBP1	1.7746	0.827498	0.0070026
OPRK1	0.357567	-1.48371	0.00700814
KRT86	2.02664	1.01909	0.00701557
HS3ST5	0.391357	-1.35344	0.00703059
PPM1L	0.533179	-0.907307	0.00703171
VDR	1.5358	0.618989	0.00708059
FGF9	0.420107	-1.25117	0.00709395
RMND5A	0.790105	-0.339884	0.00709586
PUM2	0.825356	-0.276912	0.00728755
SDSL	1.79012	0.840058	0.00731531
ZNF853	0.435497	-1.19926	0.00731531
SCN8A	0.432795	-1.20824	0.00731531
CD163	2.11	1.07724	0.00731531
VAV1	1.9809	0.986154	0.00731531
GSTT2	0.478459	-1.06353	0.00737917
HVCN1	1.63854	0.712413	0.00743194
USP43	1.49675	0.581835	0.00759854
CD28	1.87285	0.905239	0.00765445
MMP28	2.66497	1.41412	0.00779929
LOC728855	1.5208	0.604835	0.00786835
C12orf53	0.448786	-1.1559	0.00791527
IRF8	2.63269	1.39654	0.00794845
PCDH19	0.264368	-1.91938	0.00801404
CD38	2.45225	1.29411	0.00811082
TRPM7	0.786241	-0.346957	0.00811082
CD1D	1.96291	0.972997	0.0081521
LTB	2.15091	1.10495	0.00819533
SLCO1A2	0.258114	-1.95392	0.00823616
BDNF	0.460866	-1.11758	0.00823616
ZKSCAN2	0.71309	-0.487843	0.00823616
IL4R	1.47189	0.557666	0.00823616
LY6E	1.74046	0.799471	0.00823637
TLR10	2.1195	1.08372	0.00824275
PCGF5	1.34835	0.431195	0.00825945
SNAI3	1.61635	0.692741	0.00826296
MYD88	1.37104	0.455268	0.00830217
PLEKHF1	1.72387	0.785648	0.0083568
LPAR1	0.527996	-0.921402	0.0083568
SLC38A5	2.63245	1.39641	0.00846931
UBASH3B	1.75938	0.81507	0.00850212
TMEM171	2.21454	1.147	0.00854856
SPATS1	1.29311	0.370845	0.00859354
PXT1	1.43249	0.518527	0.00859452
MGRN1	1.25323	0.325657	0.00860852
LST-3TM12	2.62457	1.39208	0.00860852
FADS2	0.460626	-1.11833	0.00860852
IL27	1.51028	0.59482	0.00864043
CEBPZ	0.811775	-0.300849	0.00866502
NMNAT3	0.587128	-0.768252	0.00869739
RNF149	1.28211	0.358523	0.00869739
RASGRP4	1.66881	0.738823	0.00870681
SOX21	0.230649	-2.11623	0.00870681
HLA-DQA2	2.8731	1.52261	0.00871653
SIGLEC9	1.80337	0.850692	0.00880955
C12orf63	1.81934	0.863416	0.00882962
SOLH	1.27694	0.35269	0.00886043
C18orf55	0.759541	-0.3968	0.00899114
RHBDF1	1.33483	0.416655	0.00900909
MFNG	1.71665	0.779594	0.00902349
UST	0.465479	-1.10321	0.00904431
LOC115110	2.43417	1.28343	0.00908298
GATSL2	0.567705	-0.816786	0.00908531
RAB20	1.75481	0.811312	0.00912956
EMID2	0.393994	-1.34375	0.00912956
RHOG	1.29886	0.377245	0.00913586
KIF1A	0.211537	-2.24101	0.00927302
SYCP2L	0.360435	-1.47219	0.0092917
HHIP	0.355382	-1.49256	0.00931961
LPPR1	0.328419	-1.60639	0.0093889
CIB1	1.37897	0.463591	0.00939309
TOR2A	1.29843	0.376767	0.00939309
VNN2	2.99649	1.58327	0.00942252
KCNG3	0.39202	-1.351	0.00943884
CAPG	1.47969	0.565293	0.0094723
FOXRED2	0.669038	-0.579841	0.00951526
TLR7	2.10409	1.0732	0.0095383
CNST	0.772365	-0.372645	0.0095863
SCN5A	0.453452	-1.14098	0.00960575
KIDINS220	0.805949	-0.311239	0.00968042
LOC100286793	1.4443	0.530375	0.0096994
CBX6	0.538481	-0.893033	0.00971877
SLC16A10	0.525721	-0.927629	0.00972082
RGL4	1.59889	0.677071	0.00972082
PRAME	0.188454	-2.40772	0.00973769
SERINC2	1.69409	0.760511	0.00975857
TXK	1.88245	0.912614	0.00978848
C12orf34	0.591385	-0.757831	0.00979325
ZNF664	0.739794	-0.434805	0.00992523
BMP7	0.304816	-1.71399	0.00998127
HCG27	1.72012	0.782506	0.0100085
RGS1	1.93976	0.95588	0.010021
PSD4	1.40385	0.48939	0.010031
FADS1	0.478874	-1.06228	0.010031
LOC92659	0.644845	-0.632975	0.010031
TBCE	0.781329	-0.355998	0.0100738
SPINK2	0.504961	-0.985756	0.0100984
APOBEC3D	1.85256	0.889522	0.0100984
DHX58	1.52632	0.610062	0.0101083
TMEM117	0.705867	-0.502531	0.0101186
TWF2	1.25349	0.325949	0.0101203
MST1R	2.28795	1.19405	0.0101392
NOD1	1.29104	0.368535	0.0101417
FLJ35024	0.522774	-0.93574	0.0101625
FLJ22536	0.471553	-1.08451	0.0101625
TUBB2B	0.382433	-1.38672	0.0101625
NTN3	0.583347	-0.777574	0.0101902
ANGPTL6	1.59797	0.67624	0.0102092
TP53BP1	0.793893	-0.332983	0.0102839
HLA-DQB2	2.32039	1.21437	0.0102839
NANS	1.3835	0.468322	0.0102839
DDO	2.17713	1.12243	0.0102839
BCL2A1	1.85755	0.893405	0.0103043
RGS9BP	0.543042	-0.880865	0.0103043
KIAA0125	2.70759	1.43701	0.0103263
SALL2	0.441194	-1.18051	0.010373
C3orf58	0.619915	-0.689859	0.0104137
CASKIN1	0.406077	-1.30017	0.0104144
SAMD9	2.10601	1.07452	0.0104263
IREB2	0.796753	-0.327796	0.0104263
CD47	1.42266	0.508588	0.0104269
KYNU	2.34841	1.23168	0.0104482
NAPSB	2.19427	1.13374	0.0104482
C18orf2	0.343885	-1.54	0.0104631
C10orf93	0.613439	-0.705009	0.0104634
ARPC1B	1.45255	0.538586	0.0104634
CCL7	2.13965	1.09738	0.0105059
GIYD2	1.38352	0.468343	0.0105571
GTF3C2	0.825415	-0.276808	0.0105571
LSG1	0.73872	-0.4369	0.0105593
ADAM8	2.00517	1.00373	0.0105692
ACP2	1.30973	0.389271	0.0106316
CSRNP3	0.50068	-0.998038	0.0107321
DOCK8	1.70916	0.773289	0.0107695
ADAM6	3.26279	1.70611	0.0107695
FCGR2C	1.91063	0.934051	0.0107942
IDH3G	1.29147	0.369015	0.0108086
CDH24	0.647204	-0.627708	0.0108462
MDM1	0.657173	-0.605654	0.0108763
WDR26	0.796377	-0.328476	0.0108995
CLEC2L	0.330791	-1.59601	0.0108995
AKAP5	1.68074	0.7491	0.0110737
GABRA3	0.282809	-1.8221	0.0111316
C10orf54	1.5912	0.670114	0.011158
HRH1	1.5971	0.675451	0.0112517
EOMES	2.07639	1.05408	0.0112564
EPHB2	2.1287	1.08997	0.0113217
ABCC8	0.397096	-1.33244	0.0113716
CALCOCO2	1.27773	0.353579	0.0113727
ST7L	0.722406	-0.469118	0.011385
CST3	1.49324	0.578449	0.0114405
COBLL1	0.6664	-0.58554	0.0114985
SDS	1.90615	0.930664	0.0115087
GPR84	1.69799	0.763829	0.0115298
CLEC9A	1.70211	0.767324	0.0115465
KCNMB2	0.531216	-0.91263	0.0116183
CAND1	0.74028	-0.433857	0.0116183
LOC730101	0.445928	-1.16512	0.0116682
ADAM11	0.524672	-0.930513	0.0118946
FAM111A	1.41464	0.500438	0.0119344
IRAK2	1.87405	0.906162	0.0120472
LY75	2.39181	1.2581	0.0120715
FGF19	0.243559	-2.03766	0.0120715
TTBK1	1.87804	0.909231	0.0121623
RIPK2	1.41769	0.503541	0.0121822
SMG7	0.832529	-0.264427	0.0123001
GPR183	1.71991	0.78233	0.0123001
SCD5	0.569332	-0.812659	0.0123101
UBE4B	0.780429	-0.357661	0.0123118
TFRC	0.611836	-0.708783	0.0123266
GABRG2	0.316946	-1.65769	0.0123266
CCDC88B	1.68014	0.74858	0.0123489
CORO7	1.33769	0.419739	0.0123807
FAM18A	1.47335	0.5591	0.0125225
LPCAT1	1.48871	0.574066	0.0125577
EMR1	2.30113	1.20234	0.0125896
CCR7	2.15098	1.10499	0.0126785
C8orf80	2.2852	1.19232	0.0126785
DNAJC5B	1.95164	0.964685	0.0126872
EDF1	1.27751	0.35334	0.0128437
XRCC5	0.840804	-0.250159	0.0128437
ATXN10	0.776146	-0.3656	0.0128437
RASSF4	1.66617	0.736535	0.0130207
DHX9	0.837091	-0.256543	0.0130816
KIAA1715	0.783163	-0.352616	0.0131233
TNFRSF12A	1.62683	0.702059	0.0131393
CTSL1	1.64737	0.720168	0.0131536
C12orf56	0.320175	-1.64307	0.0131556
TRIM56	1.37139	0.455643	0.0132736
ELP2P	0.679523	-0.557406	0.0133195
MTA3	0.793051	-0.334515	0.0133703
LSM14B	0.789915	-0.340232	0.0134322
CADM4	0.560063	-0.83634	0.0134669
LASS1	0.476206	-1.07034	0.013527
TRO	0.501498	-0.995684	0.0135285
COX6B2	2.28749	1.19377	0.0137085
VSIG4	2.03283	1.02349	0.0138417
FKBP2	1.2932	0.370944	0.0138598
FXYD5	1.53325	0.616593	0.0138598
PLEKHM3	0.752988	-0.4093	0.0139118
NDUFS1	0.826418	-0.275056	0.0140506
SLC38A3	0.40847	-1.2917	0.0140603
OR7E5P	0.511594	-0.966929	0.0140759
MBTD1	0.754057	-0.407255	0.0140759
ZNF70	0.719336	-0.475262	0.0141573
TMEM173	1.49139	0.57666	0.0143882
STK17B	1.37447	0.458871	0.0143934
CEACAM4	1.66261	0.733446	0.0144144
RPRM	0.428633	-1.22218	0.0144787
C15orf17	0.804772	-0.313349	0.0145421
DIRC3	0.501189	-0.996573	0.0145646
CEP97	0.679114	-0.558274	0.0145646
OGDHL	0.259363	-1.94695	0.0146467
WDR25	1.26682	0.34121	0.0147056
CPNE5	1.78121	0.832856	0.0147671
IL26	1.54818	0.63057	0.0148155
SNX4	0.806286	-0.310636	0.0148322
BCAS3	0.74522	-0.424261	0.0148539
FOLR2	1.9373	0.954047	0.0148998
IGSF9	0.547855	-0.868134	0.015017
OAF	1.44557	0.531639	0.0151689
SLC30A3	0.418596	-1.25637	0.0151732
CLNK	1.52737	0.611046	0.0151732
YIF1A	1.27719	0.35297	0.0151976
NLRC4	1.49833	0.58336	0.0153588
RASGRP3	1.71351	0.776957	0.0154928
BTN2A1	1.33346	0.415176	0.0155161
C9orf45	0.627757	-0.671722	0.0155241
VWA5B2	0.393256	-1.34646	0.0156028
CEACAM21	1.72604	0.787467	0.0156297
ATRN	0.690716	-0.533836	0.0157511
GNAS	0.795286	-0.330454	0.0159203
PSMB2	1.22905	0.297546	0.0159409
FCRL1	2.23642	1.16119	0.0160467
POU3F2	0.455083	-1.1358	0.0161096
CAND2	0.499361	-1.00184	0.0161096
LOC80154	0.710745	-0.492596	0.0161096
CCM2	1.29115	0.368662	0.0161201
PALM2	0.483254	-1.04915	0.0161201
PNPLA3	0.448583	-1.15655	0.0161354
FCGR2B	2.02573	1.01844	0.0161633
TOM1L1	0.747708	-0.419452	0.0166281
DKKL1	0.561497	-0.832649	0.0167306
BIRC3	2.34829	1.23161	0.0167306
CLEC17A	1.90728	0.931516	0.0167306
VWDE	0.316797	-1.65837	0.016862
RILP	1.46611	0.551996	0.0169666
FAM38A	1.34328	0.425765	0.0169743
NPTXR	0.400763	-1.31918	0.0170009
RND2	0.423503	-1.23956	0.017036
GDF11	0.67005	-0.577659	0.0170463
PRPF40B	0.698561	-0.517542	0.0170499
CXXC4	0.51527	-0.956599	0.0170723
ROBO2	0.398791	-1.32629	0.0170723
TMEM222	1.21736	0.283751	0.0171446
TPR	0.812734	-0.299145	0.0172589
CXCR5	2.02143	1.01538	0.0172899
CFLAR	1.37475	0.459167	0.017408
GPR97	1.82777	0.870081	0.0174261
KCNAB3	0.587468	-0.767417	0.0174668
CRIP1	1.87913	0.910062	0.0175118
SPNS3	2.08252	1.05833	0.0175846
NT5C3	1.44238	0.528453	0.0176714
NYNRIN	0.570865	-0.808778	0.0177375
TMEM14A	0.69174	-0.531699	0.0177949
TNF	2.26612	1.18023	0.01787
SIGLEC8	2.19653	1.13523	0.017907
CCR9	1.53033	0.613843	0.017907
TIAF1	1.42644	0.51242	0.0179703
SNX31	0.333373	-1.58479	0.0179703
PDE6G	1.59332	0.672035	0.0181011
GJD3	1.51895	0.603074	0.0181558
RLTPR	2.11265	1.07905	0.0181558
CCRL1	1.92934	0.948108	0.0183246
N4BP2	0.706524	-0.50119	0.0183522
C5AR1	1.60945	0.686572	0.0184582
XKR9	2.53092	1.33966	0.0185798
PIK3AP1	1.91469	0.93711	0.0185931
HLA-L	1.57121	0.651874	0.0185931
GAS2L2	2.05113	1.03642	0.0187116
NCRNA00158	1.36811	0.452185	0.0187116
CAPN3	1.66726	0.737476	0.0187116
FBXO27	0.35524	-1.49313	0.0187542
WWP2	1.24837	0.320051	0.0187547
LRRC16B	0.459364	-1.12229	0.0188276
SMO	0.416982	-1.26194	0.0190403
SH3BGRL3	1.35359	0.436795	0.0190576
LY96	1.64973	0.72223	0.0190576
PIK3CD	1.61916	0.695247	0.0191178
WDR72	0.303269	-1.72133	0.0191412
C20orf194	0.629996	-0.666586	0.0191412
KREMEN1	0.569965	-0.811055	0.0192615
PIM2	1.60101	0.678985	0.0192615
TOP2B	0.749346	-0.416296	0.0192615
SHISA9	0.386155	-1.37275	0.0193489
SP4	0.724663	-0.464618	0.0193489
MEX3A	0.494922	-1.01473	0.0193489
ZFR	0.835631	-0.259062	0.0195063
PDLIM1	1.40546	0.491039	0.0197266
SOCS1	1.6577	0.72918	0.0198565
FSTL4	0.276219	-1.85612	0.0198606
C20orf141	1.44192	0.527987	0.0199492
PRDM11	0.676871	-0.563047	0.0199492
PTCRA	1.48503	0.570496	0.0199839
TBCCD1	0.783624	-0.351766	0.0199839
CSF2RA	1.74863	0.806222	0.0199839
INPP1	1.47485	0.560568	0.0199964
TPI1P2	0.608209	-0.71736	0.0200323
MFSD7	1.70786	0.772189	0.0202015
C6orf150	1.68829	0.755563	0.0202277
EXTL2	0.702174	-0.510099	0.0202501
DEF6	1.37575	0.460215	0.0203174
MTMR2	0.810013	-0.303983	0.0203415
PARD3	0.65529	-0.609794	0.0204023
SFMBT2	1.7946	0.843659	0.0204781
PIAS3	0.717015	-0.479926	0.0205118
PSORS1C1	2.0055	1.00397	0.0205846
GHR	0.458357	-1.12546	0.0206351
ACAP2	0.740611	-0.433212	0.0206351
ANXA11	1.42202	0.50794	0.0206723
STAP1	1.95068	0.963977	0.020709
ABCD1	1.40395	0.48949	0.0207417
CXorf49B	2.52814	1.33807	0.0207868
CDON	0.554283	-0.851305	0.0207949
C1orf54	1.46871	0.554553	0.0207949
CECR2	0.338779	-1.56158	0.0208483
SMAD5OS	0.599595	-0.73794	0.0208483
PITPNM1	1.35168	0.434754	0.0209336
DLX4	0.522206	-0.937309	0.02094
MYST2	0.839731	-0.252001	0.0209612
ZC3H12A	1.60715	0.684508	0.0209612
C19orf26	0.51854	-0.947474	0.0210571
TTC39C	0.68434	-0.547216	0.0210616
LOC100190938	0.515209	-0.956771	0.0212024
GRIN2D	2.33565	1.22383	0.0212129
ZMAT3	0.732119	-0.449851	0.0212129
HS2ST1	0.767924	-0.380964	0.0212129
GAMT	0.45177	-1.14634	0.0212129
GMCL1L	0.700987	-0.51254	0.0212129
ATG7	1.24878	0.320516	0.0212129
SSH3	1.36963	0.453782	0.0212552
FBXW5	1.2319	0.300882	0.0213032
SHF	0.604777	-0.725526	0.0213274
B3GALNT2	0.795387	-0.330272	0.021352
AIPL1	1.47361	0.559357	0.0214094
CACHD1	0.543045	-0.880857	0.0214252
BLMH	0.676494	-0.56385	0.0214252
EFR3B	0.548973	-0.865193	0.0216401
TMCO4	1.32214	0.402877	0.0217319
C3orf17	0.788161	-0.343437	0.0217319
SEMA3D	0.313179	-1.67494	0.0217319
FAM150B	0.506446	-0.98152	0.02181
SLC25A33	0.730948	-0.452159	0.0218169
AIF1L	0.533826	-0.905557	0.0218421
ARRDC1	1.35764	0.441099	0.0218501
TMEM71	1.81203	0.857609	0.0218635
TFB2M	0.772307	-0.372754	0.0218635
SUSD3	1.70328	0.768314	0.0218635
MRPL33	0.84475	-0.243404	0.0218635
APOC1	2.06389	1.04536	0.0218659
ZBTB7A	1.25509	0.327787	0.0218927
B4GALT4	0.663765	-0.591256	0.0219777
FIGNL2	0.567257	-0.817927	0.0221321
FPGS	1.28133	0.357642	0.0221445
ARL6IP5	1.31925	0.399719	0.0221445
TMEM208	1.26332	0.337218	0.0221445
NGF	0.495217	-1.01387	0.0221516
ZNF77	0.766553	-0.383542	0.0221819
TP53BP2	0.8117	-0.300981	0.0223237
CADM1	0.459514	-1.12182	0.0223241
PCSK7	1.35372	0.436933	0.0223377
KCNJ10	1.86194	0.896807	0.0224267
CLTB	1.46569	0.551584	0.0225229
PANK3	0.735183	-0.443825	0.0225423
HLA-J	1.85218	0.889225	0.0225566
PCNP	0.820589	-0.285267	0.0226095
TTC28	0.618205	-0.693844	0.0226197
IDI2	0.731078	-0.451902	0.0226197
WIF1	0.328764	-1.60488	0.0227154
ENTPD3	0.403848	-1.30812	0.0227217
COX11	0.82997	-0.268869	0.0227775
BEND5	0.478343	-1.06388	0.0227911
PLCB1	0.603219	-0.729247	0.0229201
GABRG3	0.498286	-1.00495	0.0229201
CCDC68	2.89355	1.53284	0.0229201
LRFN2	0.544965	-0.875765	0.0229896
LMAN1	0.778705	-0.360851	0.0229896
FOSL1	2.05343	1.03803	0.0229896
PRSS36	1.38537	0.470274	0.0230184
MS4A1	3.15529	1.65777	0.0230468
C2orf3	0.807567	-0.308346	0.0231271
IL2	1.26417	0.338189	0.0231699
DLX5	0.302374	-1.7256	0.023256
COL9A3	0.37255	-1.42449	0.023256
GGTA1	1.76823	0.822308	0.0232736
FAM175B	1.17983	0.238583	0.0232889
ESRRA	1.3076	0.386918	0.0233104
LOC96610	2.42347	1.27708	0.0233787
GALNT11	0.731091	-0.451877	0.0234676
TMEM176B	1.90536	0.930062	0.0234676
BCL9	0.758191	-0.399367	0.0234676
EEF1A2	0.283157	-1.82032	0.0236186
LOC400927	0.68716	-0.541281	0.023635
COMTD1	1.41514	0.500948	0.0236409
USP2	0.55239	-0.856241	0.0237612
APPBP2	0.825727	-0.276263	0.0237612
XPO1	0.8182	-0.289475	0.0237612
ACE2	2.66567	1.4145	0.0239096
WAC	0.846526	-0.240374	0.0239096
NFKBIE	1.49528	0.58042	0.0239356
AGBL5	0.750914	-0.41328	0.0239802
SCUBE2	0.466852	-1.09896	0.0239802
CCR4	1.98232	0.987188	0.024026
EMID1	0.445803	-1.16552	0.0240562
RYK	0.753309	-0.408687	0.0241024
DPYSL5	0.437067	-1.19407	0.0241024
CLEC12A	2.16257	1.11275	0.0241024
SOX5	0.514779	-0.957975	0.0241488
CLSTN2	0.489426	-1.03084	0.0241609
STAC3	1.50427	0.589063	0.0242597
TRIM24	0.710596	-0.492899	0.0243947
PHGDH	0.474403	-1.07581	0.0244005
GLRX	1.5954	0.673915	0.0248293
TRIM33	0.804141	-0.31448	0.0248313
IFNAR2	1.31384	0.393792	0.0248313
CERK	0.736548	-0.441149	0.024917
IGJ	2.90831	1.54018	0.0249803
SLC7A7	1.83351	0.874611	0.0249962
KCNH1	0.438516	-1.1893	0.0250478
TERF1	0.803347	-0.315905	0.0250883
RPS6KA4	1.36272	0.446488	0.0250908
SOCS5	0.824931	-0.277655	0.0250908
FLJ90757	0.72731	-0.459357	0.0251488
APOC2	2.23387	1.15955	0.025167
CYP26A1	0.282702	-1.82265	0.0252509
ITGB4	1.62875	0.703766	0.0253837
FAM161A	0.666175	-0.586027	0.0254644
SIRT6	1.23701	0.306855	0.0255817
XIRP1	2.24862	1.16904	0.0256015
C8orf37	0.719994	-0.473944	0.0256015
TNFRSF8	1.93931	0.955542	0.0257423
RHBDL2	1.76926	0.823149	0.0257423
PMS2	0.816581	-0.292332	0.025823
SIGLEC5	1.64812	0.720824	0.025823
PEG10	0.280075	-1.83612	0.0258928
VCX3A	0.372623	-1.42421	0.0258928
GRIK4	0.554321	-0.851207	0.0261157
PTCH1	0.567739	-0.8167	0.0263347
KSR2	0.453126	-1.14201	0.0263592
CLEC6A	1.43008	0.516091	0.0264536
AIM1	1.55255	0.634642	0.0264626
TPK1	1.79218	0.841717	0.0264626
TRDN	0.395203	-1.33934	0.0265711
IFITM4P	1.20213	0.265587	0.0268251
CLCN7	1.21076	0.275914	0.0268251
CHML	0.672435	-0.572534	0.0268271
SLC1A6	0.406593	-1.29834	0.026903
TIMD4	1.68892	0.756104	0.0269572
XKR5	0.498636	-1.00394	0.0269843
C9orf11	1.3076	0.38692	0.0270082
ADRA2B	0.540036	-0.888872	0.0271164
GPA33	4.30321	2.10541	0.0272631
STARD5	1.56678	0.647798	0.0273805
ARSA	1.28853	0.365725	0.0274104
ALPK1	1.39138	0.476512	0.0274462
CAMK1D	0.542638	-0.881938	0.0274833
RIN1	1.53137	0.614821	0.0274833
YME1L1	0.835966	-0.258483	0.0274833
TNIP2	1.22089	0.28793	0.0274833
ZFYVE27	1.32219	0.402926	0.0275568
CFL1	1.21944	0.286217	0.0276807
WBP1	0.808805	-0.306137	0.0276807
SLC25A37	1.39309	0.478293	0.0276807
CLDN20	0.501142	-0.99671	0.0277278
GSK3B	0.773821	-0.369928	0.0278105
PRDM8	1.75746	0.813495	0.027869
VPS54	0.828188	-0.27197	0.0278987
PTPRE	1.37092	0.455149	0.0279039
ZADH2	0.789223	-0.341495	0.0279127
C1orf200	1.41584	0.501657	0.0279127
GUCY2D	0.502634	-0.992419	0.0280516
ARID2	0.790969	-0.338307	0.0280784
ACVR2B	0.712796	-0.48844	0.0281756
PAH	0.345838	-1.53183	0.028196
GBP7	1.39276	0.477952	0.028196
LOC284441	0.800169	-0.321624	0.0282144
PIK3R6	1.71584	0.778916	0.0285573
STX4	1.22077	0.287791	0.0286876
WIPF1	1.60312	0.680883	0.0287669
KCNB2	0.494339	-1.01643	0.0290941
WEE1	0.74737	-0.420105	0.0291006
TMEM81	0.777943	-0.362264	0.0291114
TMEM116	0.587236	-0.767988	0.0291114
TEKT2	0.562028	-0.831287	0.0291114
BATF3	1.45689	0.54289	0.0291398
ARHGEF19	0.589237	-0.763079	0.0291398
ABI2	0.742883	-0.428794	0.0291556
MPP2	0.490471	-1.02776	0.0291993
CLEC10A	2.09434	1.06649	0.0296359
KIF5B	0.767088	-0.382536	0.029643
FADS6	0.363163	-1.46131	0.0296433
C1orf198	0.785618	-0.3481	0.0296433
LMO4	0.680656	-0.555003	0.0296433
IARS2	0.818197	-0.28948	0.0297597
CAMSAP1L1	0.741866	-0.430769	0.0298174
KRT222	0.68047	-0.555397	0.0298174
RASSF9	0.447648	-1.15956	0.0298174
JSRP1	2.50312	1.32373	0.0298442
SIX4	0.550458	-0.861294	0.0298442
SMAD4	0.754601	-0.406214	0.0298527
GRM3	0.597927	-0.74196	0.0298527
EFNB1	1.60365	0.681363	0.029863
DNAJC18	0.703089	-0.508221	0.0299047
DDTL	0.744525	-0.425607	0.0300177
HS6ST3	0.395582	-1.33795	0.0301711
NAGPA	1.23158	0.300506	0.0301711
CHRNA4	0.581176	-0.782954	0.0301711
RRP15	0.8009	-0.320305	0.0301711
PYGO1	0.468766	-1.09306	0.0301763
PTPN11	0.84835	-0.237268	0.0301763
APBB1IP	1.87588	0.907565	0.0301763
C1R	1.68262	0.750708	0.0302303
SPOCK2	1.80592	0.852736	0.0302635
FBXL15	1.26834	0.34294	0.0302635
CPT1C	0.592255	-0.755709	0.0302635
GYLTL1B	0.518224	-0.948353	0.0303383
ARHGAP25	1.54929	0.631605	0.0303691
MOBKL1A	0.772544	-0.372311	0.0304375
ATP6V0B	1.22907	0.297568	0.0304592
C1S	1.82219	0.86567	0.0304612
ULK3	0.783398	-0.352183	0.0304834
PCSK1N	0.324506	-1.62368	0.0304834
CCDC42	1.24306	0.313894	0.0304988
CD5L	1.30507	0.384129	0.0305375
ARHGEF6	1.57482	0.655187	0.0305375
SEMA6C	0.656082	-0.608053	0.0306097
CUL3	0.835862	-0.258663	0.0306097
KIAA1467	0.611393	-0.709827	0.0306153
ITGA3	1.63937	0.713146	0.030647
IGFBPL1	0.46893	-1.09255	0.030647
C18orf10	0.738743	-0.436856	0.030647
PBX1	0.542042	-0.883524	0.0308069
PATL1	1.20709	0.271537	0.030825
RHOQ	0.749966	-0.415103	0.0310405
CD19	2.25495	1.1731	0.0310572
EIF4G3	0.825918	-0.275929	0.0313997
LUZP2	0.455873	-1.1333	0.031434
ITM2A	1.7566	0.812783	0.0314822
PFN4	0.642145	-0.639028	0.0315529
CASS4	1.5946	0.673197	0.0315529
KCTD5	1.21783	0.284319	0.0316434
GDF9	0.719162	-0.475611	0.0316619
BCAR1	1.27513	0.350649	0.0316696
CCL13	2.20136	1.13839	0.0316696
LARGE	0.603623	-0.728281	0.0317043
SLC26A10	0.448182	-1.15784	0.0317067
C9orf139	1.46241	0.548347	0.0319004
TMEM168	0.710768	-0.49255	0.0319026
ESPNP	0.566315	-0.820323	0.0319383
C1QL4	0.540779	-0.886889	0.0319383
C11orf68	1.25804	0.331182	0.0319383
C20orf118	1.8981	0.924553	0.0319383
LYN	1.51084	0.595349	0.0319481
CALCB	0.619469	-0.690895	0.0320004
SIPA1L2	0.628924	-0.669043	0.0320004
ZNF236	0.803134	-0.316287	0.0322437
TDRG1	0.642308	-0.638663	0.0322605
CSDE1	0.814494	-0.296025	0.0322605
NAALAD2	0.590044	-0.761105	0.0323176
GLI1	0.409488	-1.28811	0.0323176
NR1H3	1.49756	0.58261	0.0323176
LEF1	0.583749	-0.776581	0.0324163
RAB1B	1.21669	0.282957	0.0324627
KLHL8	0.792805	-0.334961	0.0326784
CCR8	1.73803	0.797453	0.0326874
DMRT3	0.407697	-1.29443	0.0327421
DZIP1	0.536843	-0.897429	0.0327632
MGC2889	0.577698	-0.791614	0.0330933
ZNF770	0.743616	-0.42737	0.0334623
TDG	0.78574	-0.347877	0.0334624
GOLIM4	0.694798	-0.525335	0.033496
LOC727677	1.39545	0.480729	0.0336866
PIAS2	0.728167	-0.457658	0.0337633
GSDMB	2.29512	1.19857	0.0338644
WDR43	0.812949	-0.298763	0.0339265
TROVE2	0.83205	-0.265258	0.0339985
E2F4	1.22262	0.289971	0.0340258
LRMP	2.04708	1.03357	0.0340349
C19orf10	1.21674	0.283026	0.0340353
P2RY8	1.7436	0.80207	0.0340819
MYCN	0.37923	-1.39886	0.0340911
FAM36A	0.803657	-0.315348	0.0340911
LOC338758	0.689861	-0.535622	0.0341078
NKAIN1	0.492499	-1.02181	0.034187
C10orf128	1.64044	0.714086	0.034187
TNFRSF13B	2.00794	1.00572	0.0342634
TUB	0.416577	-1.26335	0.0344479
FAM98B	0.785891	-0.347599	0.0344479
SCAI	0.768062	-0.380704	0.0345048
SLC31A2	1.44236	0.528431	0.0345048
MYCNOS	0.737437	-0.439408	0.0345048
PEAR1	1.54638	0.628893	0.0345048
LNX1	0.636261	-0.652309	0.0346526
FOXD4L3	1.24228	0.31299	0.0346526
C3orf47	0.664712	-0.589198	0.0347149
GGH	0.663804	-0.591171	0.0347149
ARHGAP17	1.2111	0.276323	0.0347149
FCRLA	2.17815	1.1231	0.034729
CNR2	1.74735	0.805167	0.0347924
FGFR1	0.571297	-0.807686	0.0348129
LILRA2	1.60691	0.684285	0.0348129
CCDC117	0.805808	-0.311491	0.0348129
DHFRL1	0.735949	-0.442322	0.0348129
DYNLT1	1.23561	0.305223	0.0349156
DUSP19	0.692592	-0.529922	0.0349236
SIDT1	2.09298	1.06556	0.0349236
CLIC1	1.2968	0.374961	0.0350173
MMP7	3.37997	1.75701	0.0350962
IFT81	0.746484	-0.421817	0.0351929
HRNR	0.494064	-1.01723	0.0351929
HPS1	1.23453	0.30396	0.0351929
TMSL3	1.38364	0.46847	0.0352681
PSORS1C3	1.82736	0.869758	0.0353117
SIRPD	1.17411	0.231567	0.0353117
SH2D3A	1.35318	0.436355	0.0353277
TIPRL	0.838837	-0.253538	0.0353277
LRP2	0.423378	-1.23998	0.0353344
TMEM131	0.848081	-0.237726	0.0354819
SIGLEC12	2.12232	1.08564	0.0354972
NINJ1	1.41125	0.496974	0.0355252
TMEM54	1.33956	0.421756	0.0355736
MFN1	0.803308	-0.315975	0.0356452
MAP3K11	1.20774	0.272305	0.0356452
GPR161	0.565675	-0.821956	0.0356533
CACNA1B	0.309812	-1.69054	0.0356811
LOC729082	0.810387	-0.303318	0.0357482
GNGT1	0.536421	-0.898562	0.0357551
LPCAT4	1.36101	0.444674	0.0358029
LHX1	2.33583	1.22393	0.0358029
ALDH9A1	0.783631	-0.351753	0.0358039
PLCB3	1.37955	0.464196	0.0358563
ADA	1.54779	0.630208	0.0360557
TARBP1	0.750386	-0.414296	0.0360557
ZXDC	0.797323	-0.326764	0.0360638
TMEM136	0.684723	-0.546407	0.0360638
CDC73	0.853989	-0.227711	0.0360638
CCL18	2.26352	1.17857	0.0361587
POLD4	1.39154	0.476685	0.0361666
SIPA1	1.29173	0.369306	0.0363195
ZNF496	0.749177	-0.416622	0.0363247
ABCB6	0.624594	-0.679008	0.036468
LONRF1	0.71145	-0.491166	0.0366888
PLEKHO2	1.32286	0.403658	0.036755
MOAP1	0.795597	-0.329891	0.0368662
FCRL2	2.09122	1.06434	0.0369757
IFNK	1.42707	0.513061	0.0370552
KIAA1919	0.789822	-0.340401	0.0371635
TRIM78P	1.50312	0.58796	0.0371677
CCDC52	0.787134	-0.345319	0.0372034
ARID3A	0.643397	-0.636218	0.0373675
WIPI1	0.698549	-0.517566	0.0373814
SHPRH	0.804953	-0.313024	0.0373825
DRAP1	1.35081	0.433824	0.0374347
GIMAP8	1.62784	0.702956	0.0374347
ANP32C	0.798111	-0.325338	0.0374347
ELOVL6	0.645322	-0.631909	0.0374347
PARP1	0.79577	-0.329576	0.0376329
C7orf51	0.58397	-0.776034	0.0376975
NOC4L	1.24198	0.312647	0.037698
AFAP1L2	1.64801	0.720728	0.0377833
USP32	0.821344	-0.283941	0.0377833
RPAP3	0.830024	-0.268775	0.0378881
UCA1	3.19545	1.67602	0.0380165
CD40	1.73306	0.793325	0.0381019
C20orf108	0.704665	-0.504991	0.0381754
ZDHHC12	1.27936	0.355422	0.0381754
LHFPL2	1.36952	0.453675	0.0381754
NT5E	1.9207	0.941634	0.0382931
TBX2	0.674651	-0.567787	0.0382931
MTHFSD	1.23659	0.306371	0.0384777
PIK3C2A	0.801879	-0.318544	0.038802
ETV5	0.592574	-0.754932	0.0388534
REEP5	1.21036	0.275436	0.0390699
IL17C	2.05335	1.03798	0.03916
KBTBD7	0.762658	-0.390891	0.0391812
ALOX5	1.83895	0.878884	0.0394113
ZNF524	1.26639	0.340721	0.0394113
NUP133	0.829149	-0.270297	0.0394113
CAMK2N1	1.95505	0.967206	0.0394919
ZNRD1	1.259	0.332283	0.0394919
HRASLS2	2.08984	1.06339	0.0396932
GDAP1	0.625199	-0.677612	0.0397438
FRS2	0.718841	-0.476255	0.0397806
FAM40B	1.71972	0.782173	0.0398794
RIMS4	0.469745	-1.09005	0.0399257
RRAD	2.2033	1.13966	0.0400071
AAK1	0.807525	-0.308421	0.0400071
ADAM23	0.316729	-1.65868	0.04001
C15orf59	0.458672	-1.12447	0.0401457
CMTM7	1.59396	0.672619	0.0402944
NTF3	0.53765	-0.895262	0.0403149
TNFSF14	1.80821	0.854566	0.0403766
PHLPP1	0.744922	-0.424838	0.0403766
POU2AF1	2.294	1.19787	0.0404949
CD22	2.0774	1.05478	0.040882
GPR149	0.509525	-0.972776	0.040882
ADCY7	1.40622	0.491818	0.040882
DLG1	0.764646	-0.387136	0.0409626
CYSLTR2	1.64081	0.714411	0.0410088
TSPAN32	1.58588	0.665281	0.041162
AK2	1.19745	0.259969	0.0412632
ZMYND11	0.815232	-0.294718	0.0413204
ACVR2A	0.754875	-0.405691	0.0418478
EIF4B	0.840153	-0.251276	0.0419132
SBK1	0.442579	-1.17599	0.0420947
FBXO31	1.19105	0.25223	0.0421614
SLC24A6	1.27801	0.353899	0.0421939
PRKDC	0.758498	-0.398783	0.0421957
INF2	1.33098	0.412486	0.0422244
SBNO2	1.27113	0.346115	0.0422426
GTF3C3	0.84139	-0.249154	0.0422426
GTF2B	1.20446	0.268389	0.0422426
OXGR1	0.412988	-1.27583	0.0422426
KPNA5	0.720118	-0.473696	0.0425551
MYOF	1.47184	0.557618	0.0425576
NRCAM	0.429886	-1.21798	0.042576
CDK2AP2	1.32315	0.403972	0.0427077
MPHOSPH10	0.836113	-0.25823	0.042795
ZNF124	0.69462	-0.525704	0.0428112
GTPBP8	0.819963	-0.286369	0.0430335
SIL1	1.25581	0.328616	0.0431357
MARK1	0.455613	-1.13412	0.0431586
PSMB3	1.22494	0.292712	0.0431586
FOLH1	0.51231	-0.964912	0.0431586
CDK18	1.48316	0.568679	0.0433215
CCNY	0.835934	-0.258539	0.0433919
PEX5L	0.609695	-0.713841	0.0434829
SDC4	1.43919	0.525257	0.0435263
ADAMTS18	0.408484	-1.29165	0.0435263
CD300C	1.57129	0.651953	0.0435263
MSH6	0.75157	-0.412021	0.0435738
PKD2L1	1.42747	0.513462	0.0436976
LOC728875	1.69719	0.763148	0.0437052
CLEC4D	1.59555	0.674054	0.0438235
FZD9	0.496767	-1.00936	0.0438283
ASB3	0.823804	-0.279628	0.0438283
TELO2	1.22747	0.295688	0.0438283
CTDSPL2	0.820405	-0.285593	0.0438967
KIAA1958	0.689051	-0.537317	0.0438967
RELT	1.34889	0.431776	0.0438967
ZNF213	1.23051	0.299258	0.0438967
PCCB	0.79332	-0.334026	0.0439263
RAB3B	0.445041	-1.16799	0.0439263
FAM155B	0.360721	-1.47105	0.0439263
LAMP3	1.71663	0.779582	0.0439486
CCDC11	0.579189	-0.787895	0.0442179
DTHD1	1.73581	0.79561	0.044397
SEMA7A	1.58248	0.662184	0.044397
TYK2	1.19677	0.259141	0.044397
SLC15A4	1.19397	0.255762	0.0444537
FBXO11	0.850599	-0.233449	0.0444786
C1orf183	0.713253	-0.487514	0.0444786
XRN1	1.28228	0.358716	0.0444908
GPRC5D	0.587666	-0.766932	0.044586
RELA	1.17931	0.237941	0.0446304
NAP1L1	0.776332	-0.365254	0.0446304
MAML3	0.699026	-0.516582	0.0447931
VANGL2	0.426769	-1.22847	0.0447931
CACNA2D4	1.48858	0.573934	0.044865
KCNH3	0.516842	-0.952204	0.0450818
OBFC1	1.2622	0.335942	0.0452664
OAZ2	0.844957	-0.243051	0.0453054
BAI2	0.515644	-0.955553	0.0453054
GNPTG	1.23009	0.298761	0.0454607
VAMP8	1.25466	0.327298	0.0456162
NR1D2	0.739898	-0.434601	0.0456162
KCNAB2	1.50539	0.590135	0.0456183
CCDC121	0.77466	-0.368366	0.0456183
ME1	0.606194	-0.722148	0.0456183
OTOA	1.50824	0.592862	0.0456183
MEX3B	0.631837	-0.662376	0.0457884
POLI	0.735933	-0.442354	0.0457884
GRAMD1B	2.46507	1.30163	0.0458285
LOC255167	0.449903	-1.15231	0.045889
CACNA1G	0.60607	-0.722445	0.0459326
VASP	1.25587	0.32869	0.0459326
PLA2G2A	5.17154	2.37059	0.0459326
USP46	0.777275	-0.363503	0.0459515
PAPSS1	0.805296	-0.312409	0.0460575
SNX15	1.25013	0.322079	0.0460575
ARL13B	0.745346	-0.424017	0.0460575
G0S2	1.88369	0.913562	0.0460955
SLC19A2	0.738389	-0.437546	0.046155
EIF3L	0.82545	-0.276747	0.0464043
RFWD2	0.84278	-0.246772	0.0464167
MAGEF1	0.703722	-0.506923	0.0464882
ENO3	0.656449	-0.607246	0.0465705
SGEF	0.49677	-1.00935	0.0466461
PTGR1	0.60964	-0.713971	0.0466461
RCE1	1.26699	0.341403	0.0466461
CCNB1IP1	0.763801	-0.388731	0.0466461
KCNC1	0.638343	-0.647597	0.0466461
CYLD	1.27897	0.354977	0.0467356
SMEK2	0.850641	-0.233377	0.0469092
COL24A1	0.502373	-0.993168	0.0469092
C14orf37	0.603207	-0.729275	0.0469158
ARID1A	0.809956	-0.304085	0.0469158
HECTD3	1.26482	0.33893	0.0469158
ROPN1B	0.616258	-0.698394	0.0470172
ASTN2	0.520924	-0.940854	0.0470753
ZNF670	0.761683	-0.392738	0.0470753
FPR1	1.66796	0.738085	0.0470753
SLFN14	1.41385	0.499634	0.0470753
KIAA1328	0.773686	-0.370179	0.0471515
RB1CC1	0.787368	-0.34489	0.0474358
GMIP	1.32817	0.409437	0.0474358
C19orf33	1.98113	0.986324	0.0477375
C14orf68	1.34799	0.430815	0.0478397
PIGQ	1.20371	0.26749	0.0479772
SFT2D1	1.24204	0.312713	0.0479809
FAM46C	2.01291	1.00928	0.0479846
FMO9P	0.493484	-1.01892	0.0480256
ZNF638	0.83272	-0.264097	0.0483436
LOC283070	0.590586	-0.75978	0.0484308
ATP6V1E2	0.699807	-0.51497	0.0488043
NAIP	1.43954	0.525605	0.0489128
SOX12	0.696619	-0.521559	0.0491937
PPYR1	2.09512	1.06703	0.0492853
C13orf29	1.6479	0.720633	0.0492853
EPC1	0.810041	-0.303933	0.0492853
STX18	1.23633	0.306063	0.0492853
FAM117B	0.747582	-0.419696	0.0494351
FZD7	0.54034	-0.888062	0.0494351
TSNAX	0.836289	-0.257927	0.0495367
MED13L	0.805201	-0.312578	0.0495763
RAB3IP	0.687847	-0.53984	0.0495763
DDHD1	0.755709	-0.404097	0.0497112
RNF166	1.25186	0.324072	0.0497112

## Sheet: GBM
id	fc	log2fc	padj
TAP1	4.11021	2.03921	4.92495e-26
HLA-H	3.02486	1.59687	5.97558e-18
HLA-A	3.27801	1.71282	3.63786e-17
PSMB8	2.91082	1.54143	9.34447e-17
BATF2	4.34085	2.11798	9.34447e-17
PSMB9	3.57082	1.83626	4.80001e-16
HLA-B	3.36772	1.75177	6.32059e-16
LOC400759	7.94057	2.98924	2.34062e-15
HLA-C	3.33317	1.7369	1.30713e-14
IRF1	2.8599	1.51596	2.05848e-14
ETV7	5.93847	2.57009	4.42389e-14
GBP1	4.27573	2.09617	7.19047e-14
CXCL11	8.38854	3.06842	1.38272e-12
CXCL10	7.17746	2.84347	2.22913e-12
STAT1	2.3725	1.24641	4.82722e-12
HLA-F	2.97152	1.5712	1.06022e-11
TRIM21	2.17667	1.12212	2.11849e-11
BST2	3.71688	1.89409	2.54684e-11
IFI35	2.80104	1.48596	7.0518e-11
PLSCR1	2.55908	1.35563	1.20674e-10
TAP2	2.07644	1.05411	1.79974e-10
HCP5	3.51463	1.81337	1.85005e-10
ISG15	4.21011	2.07386	2.96431e-10
UBE2L6	1.80557	0.852453	3.77003e-10
B2M	2.27628	1.18668	3.8615e-10
LOC400696	5.13262	2.3597	3.8615e-10
OAS1	4.07728	2.02761	4.13649e-10
PARP9	2.2735	1.18492	5.20732e-10
RSAD2	4.31492	2.10934	5.22686e-10
CASP1	2.73524	1.45167	5.22686e-10
WARS	2.15862	1.11011	9.84401e-10
OASL	3.97471	1.99085	1.07672e-09
IFITM3	2.77279	1.47134	1.13594e-09
IDO1	8.41182	3.07242	1.13931e-09
TRIM22	2.8404	1.50609	1.18332e-09
BTN3A1	1.82994	0.871795	1.21815e-09
HLA-E	1.99972	0.999798	1.23612e-09
PSME2	1.89575	0.922767	1.25893e-09
IRF7	2.35839	1.2378	1.66473e-09
PSME1	1.91778	0.939439	1.78441e-09
BTN3A3	2.06183	1.04393	1.78441e-09
IFIT3	2.79398	1.48232	2.64428e-09
DTX3L	2.16922	1.11718	4.51653e-09
IFIH1	2.5144	1.33021	6.96982e-09
GBP4	3.29357	1.71965	8.91898e-09
APOL1	3.54547	1.82598	9.77862e-09
EPSTI1	2.6607	1.41181	1.01296e-08
IFI6	3.66901	1.87539	1.19994e-08
LAP3	1.72415	0.785885	1.50877e-08
NMI	2.10315	1.07256	1.66086e-08
DDX58	2.18167	1.12543	1.90014e-08
APOL6	2.56097	1.35669	1.91474e-08
SP110	2.01287	1.00925	1.99224e-08
RTP4	2.89712	1.53462	2.07216e-08
APOBEC3G	2.62049	1.38984	2.74869e-08
IRF9	1.81796	0.862322	2.8867e-08
OAS3	3.07693	1.62149	2.92627e-08
CMPK2	2.70739	1.4369	3.9628e-08
OAS2	3.12895	1.64568	4.39706e-08
USP18	2.2955	1.19881	4.97717e-08
CARD16	3.15239	1.65645	5.09446e-08
MX1	3.67122	1.87626	5.9965e-08
DNPEP	1.40114	0.486598	7.6123e-08
SHANK2	0.197484	-2.34019	1.0952e-07
XAF1	3.37222	1.7537	1.35378e-07
BTN3A2	2.23669	1.16137	1.37951e-07
SP140L	2.39525	1.26017	1.48976e-07
MAGEL2	0.303999	-1.71786	1.51861e-07
GBP5	3.65781	1.87098	1.79678e-07
NLRC5	2.22729	1.15529	2.1322e-07
SP100	2.19962	1.13726	3.85398e-07
TRIM5	1.97561	0.982295	4.01963e-07
HERC6	2.61418	1.38636	4.97012e-07
PDCD1LG2	2.83425	1.50297	5.05598e-07
FGF9	0.220034	-2.1842	5.30214e-07
DDX60	2.09349	1.06591	5.77883e-07
TTC3	0.586925	-0.768752	6.67289e-07
NANOS1	0.554658	-0.850331	8.86449e-07
GABRA3	0.167259	-2.57984	9.34617e-07
PRIC285	2.17208	1.11907	1.0542e-06
GPR85	0.508674	-0.975188	1.08725e-06
UNC93B1	1.94616	0.960629	1.17356e-06
IRF2	1.48272	0.568249	1.32904e-06
S100A16	2.35499	1.23572	1.4669e-06
FLOT1	1.53467	0.617931	1.77489e-06
AGTRAP	1.72132	0.783516	1.94858e-06
C20orf112	0.531294	-0.912417	1.94858e-06
CLGN	0.187924	-2.41178	1.96017e-06
HERC5	2.45151	1.29367	2.11593e-06
PARP14	2.12742	1.0891	2.11593e-06
STOX2	0.42092	-1.24838	2.14226e-06
PAK7	0.155639	-2.68372	2.14226e-06
FLT3LG	1.95271	0.965479	2.43433e-06
SRRM3	0.304184	-1.71699	2.56085e-06
VAT1L	0.210444	-2.24849	2.81586e-06
PSMB10	1.71581	0.778893	2.92708e-06
ISG20	2.03989	1.02849	3.44735e-06
PAK3	0.259163	-1.94807	3.44735e-06
IFITM1	2.72389	1.44567	3.66704e-06
PCK2	1.67602	0.745038	4.40033e-06
KIAA1549	0.487271	-1.0372	5.02498e-06
IFI44L	3.46051	1.79098	5.02498e-06
IL18BP	1.77706	0.829492	5.02721e-06
SOCS1	2.52805	1.33802	5.99744e-06
CDKN1A	2.27908	1.18845	6.38945e-06
JPH4	0.27887	-1.84233	6.41979e-06
SPATS2L	1.55557	0.637447	6.59511e-06
GRIP1	0.260195	-1.94233	7.10432e-06
RIMS1	0.243116	-2.04029	7.72117e-06
GPRIN2	0.324146	-1.62528	8.018e-06
CLIC1	1.90807	0.932116	8.09701e-06
PLCXD2	0.341822	-1.54868	8.10447e-06
PDE10A	0.306237	-1.70728	8.14448e-06
ILK	1.48293	0.568451	8.44953e-06
PSRC1	1.8832	0.913187	8.6219e-06
RARRES3	2.64373	1.40258	9.09544e-06
CYP27C1	0.243805	-2.0362	9.80346e-06
ADCY5	0.286611	-1.80284	9.80346e-06
GPRASP2	0.691087	-0.533061	1.16318e-05
DHX58	2.1192	1.08352	1.17013e-05
CLN8	0.661469	-0.596255	1.17043e-05
TAPBP	1.60332	0.681062	1.17043e-05
HTR6	0.393517	-1.3455	1.17043e-05
NPY1R	0.278451	-1.8445	1.17043e-05
MGEA5	0.694142	-0.526698	1.33942e-05
FAM171A1	0.550261	-0.861813	1.34765e-05
LOC285696	0.395323	-1.3389	1.36467e-05
USP43	0.237612	-2.07332	1.38395e-05
C19orf66	1.67807	0.746801	1.56736e-05
PLCB4	0.363223	-1.46107	1.56911e-05
CDH18	0.189277	-2.40143	1.66482e-05
DRAP1	1.37404	0.458424	1.66513e-05
GABRB3	0.205943	-2.27968	1.71917e-05
HOXD4	0.271413	-1.88144	1.72503e-05
BEND4	0.242318	-2.04502	1.72503e-05
BASP1	0.391288	-1.3537	1.74147e-05
C6orf108	1.60075	0.678751	1.74682e-05
RIPK1	1.40042	0.485855	1.76136e-05
CABLES1	0.516348	-0.953583	1.76136e-05
IFI27	2.83194	1.50179	1.76136e-05
ST6GALNAC4	1.38148	0.466213	1.79095e-05
DNM3	0.38477	-1.37793	1.79545e-05
SAMD9	2.31465	1.2108	1.79955e-05
AADAT	0.690171	-0.534975	1.83376e-05
BATF3	2.55002	1.35051	1.83376e-05
CSMD3	0.219029	-2.1908	1.84906e-05
CNTN3	0.196843	-2.34488	1.90835e-05
NSUN6	0.606605	-0.721171	1.9269e-05
TICAM1	1.53207	0.615478	1.93928e-05
ZNF248	0.646342	-0.629629	2.04341e-05
GADD45A	2.00555	1.004	2.07269e-05
CBX1	0.727551	-0.45888	2.07269e-05
USP22	0.699847	-0.514888	2.07269e-05
SAMD9L	2.32819	1.21921	2.07269e-05
AGPAT4	0.584837	-0.773894	2.07855e-05
MSL1	0.743083	-0.428404	2.09191e-05
KCNA5	0.278705	-1.84319	2.09191e-05
BAAT	0.486683	-1.03895	2.20398e-05
CNN3	1.58153	0.661317	2.20398e-05
LRP6	0.590518	-0.759946	2.23258e-05
MTMR9	0.680664	-0.554986	2.33761e-05
SATB1	0.466664	-1.09954	2.33761e-05
CCDC109B	2.07312	1.0518	2.33761e-05
TRIP6	1.72483	0.786458	2.33866e-05
TSPYL2	0.573429	-0.802314	2.39148e-05
SLC22A18	2.19096	1.13156	2.3927e-05
ZBP1	3.18719	1.67228	2.3927e-05
AFF2	0.207499	-2.26882	2.3927e-05
RARB	0.513558	-0.961401	2.3927e-05
ZBTB42	1.82845	0.870622	2.40568e-05
KCNH8	0.208187	-2.26405	2.41335e-05
C6orf168	0.524876	-0.929953	2.41574e-05
TMX1	1.44496	0.53103	2.44336e-05
TRIM34	2.11103	1.07795	2.50671e-05
RNF19B	1.38901	0.474053	2.55359e-05
ZRANB1	0.712446	-0.489147	2.55359e-05
CD151	1.85955	0.894951	2.55359e-05
MBTD1	0.654435	-0.611677	2.59673e-05
WNK2	0.221763	-2.17291	2.65175e-05
PARP12	1.96167	0.972082	2.72254e-05
IFIT1	2.6569	1.40975	2.8008e-05
RAB3C	0.249846	-2.00089	2.82049e-05
KIAA1324L	0.43175	-1.21173	2.98243e-05
GNAL	0.33767	-1.56632	3.09288e-05
RICTOR	0.628196	-0.670714	3.09288e-05
LGALS3BP	1.94181	0.9574	3.09288e-05
TMC2	0.461768	-1.11476	3.171e-05
EIF2AK2	1.54304	0.625777	3.28126e-05
TRIM67	0.224786	-2.15338	3.39856e-05
CYP26B1	0.311321	-1.68352	3.54649e-05
ZNF652	0.713446	-0.487123	3.57471e-05
SP9	0.307523	-1.70123	3.57471e-05
AMPH	0.413253	-1.2749	3.59254e-05
WASF1	0.487775	-1.03571	3.669e-05
BTRC	0.699073	-0.516485	3.72403e-05
PLEKHF2	1.40109	0.486549	3.72403e-05
S100A6	2.22182	1.15174	3.74845e-05
EGFR	4.61768	2.20717	3.81596e-05
ASXL3	0.355332	-1.49276	3.85926e-05
DDX60L	1.79543	0.844333	3.86945e-05
LOC90110	0.705883	-0.502499	3.939e-05
SS18L1	0.665661	-0.58714	3.95974e-05
CBR3	1.70817	0.772451	3.96375e-05
PRSS35	0.286072	-1.80555	3.97393e-05
RP1-177G6.2	0.257558	-1.95703	4.07335e-05
C17orf69	0.59778	-0.742313	4.08486e-05
HECW1	0.232356	-2.10559	4.08486e-05
FAM117B	0.637311	-0.64993	4.08486e-05
AGPAT2	1.86295	0.897587	4.09064e-05
RNF150	0.436088	-1.19731	4.32092e-05
CLIC4	1.56453	0.645726	4.32092e-05
C9orf45	0.446529	-1.16317	4.35989e-05
XKR4	0.289811	-1.78681	4.42586e-05
TTC38	1.52158	0.605571	4.58928e-05
KCTD16	0.388751	-1.36308	4.71559e-05
PP14571	0.490732	-1.02699	4.73316e-05
SERPINB6	1.51443	0.598779	4.81247e-05
VIPR2	0.134997	-2.889	4.81247e-05
ARHGEF9	0.650881	-0.619533	4.81695e-05
GNG2	0.553144	-0.854272	4.84597e-05
EPB41L4B	0.363195	-1.46118	4.84597e-05
HOXD3	0.222898	-2.16554	4.84597e-05
PTGER3	0.305142	-1.71245	4.88403e-05
GMPPA	1.34394	0.426464	4.89912e-05
PTPRM	0.573575	-0.801946	4.95777e-05
ZNF605	0.708795	-0.49656	5.04873e-05
PLEKHA4	2.05867	1.04171	5.16369e-05
APOBEC3D	2.18631	1.1285	5.19227e-05
S100A3	2.58322	1.36917	5.19227e-05
ELAVL2	0.2552	-1.9703	5.23107e-05
GBP3	3.22432	1.68899	5.23107e-05
GFRA1	0.209533	-2.25475	5.23107e-05
SLCO5A1	0.27728	-1.85058	5.50583e-05
ZC3H12B	0.284073	-1.81567	5.58944e-05
PPFIA2	0.262106	-1.93178	5.59589e-05
GSDMD	2.17244	1.11932	5.59932e-05
MICB	1.89116	0.919268	5.59932e-05
TMEM35	0.419523	-1.25318	5.64127e-05
IFI44	1.93887	0.955218	5.83689e-05
DLX6AS	0.151123	-2.7262	5.96074e-05
NALCN	0.434085	-1.20395	5.96372e-05
FAM125A	1.39493	0.480188	6.29204e-05
DIRC3	0.475271	-1.07318	6.29204e-05
RNF144A	0.523712	-0.933153	6.46012e-05
EYA1	0.184555	-2.43788	6.52802e-05
APOBEC3F	1.98972	0.992565	6.66355e-05
PARP10	1.98538	0.989418	6.66355e-05
LDB1	0.667481	-0.583201	6.66355e-05
PCDH11X	0.188281	-2.40904	6.6883e-05
SDSL	1.6717	0.741315	6.69376e-05
SECTM1	2.3595	1.23848	6.70704e-05
RFXANK	1.36843	0.452526	6.84018e-05
ACTL8	0.58159	-0.781926	6.84018e-05
LPPR3	0.185716	-2.42883	7.22312e-05
SLC38A1	0.422127	-1.24425	7.22312e-05
LMO2	1.88286	0.912929	7.30605e-05
SEC61A2	0.642613	-0.637977	7.49425e-05
SERTAD1	1.73241	0.79278	8.01533e-05
BCL11A	0.35675	-1.48701	8.02855e-05
SULF1	0.23584	-2.08412	8.02855e-05
FLJ43390	0.210515	-2.24801	8.07624e-05
DLX6	0.19173	-2.38285	8.07624e-05
SLC26A10	0.335402	-1.57604	8.07624e-05
CD24	0.209067	-2.25797	8.07624e-05
LOC157627	0.210441	-2.24851	8.24679e-05
DMRTA2	4.19461	2.06854	8.54543e-05
MEX3B	0.368412	-1.44061	8.77036e-05
ATRNL1	0.293565	-1.76825	8.77036e-05
MUM1L1	0.290046	-1.78565	8.80291e-05
COL11A1	0.1619	-2.62683	8.80291e-05
ZFP36L2	1.55225	0.63436	9.40199e-05
PDZK1P1	0.619804	-0.690116	9.54138e-05
TLR3	1.94467	0.959522	9.73163e-05
FAM163A	0.337424	-1.56736	9.76134e-05
LGALS3	2.77	1.46989	9.77861e-05
DYNC1I1	0.280693	-1.83294	9.77861e-05
TBC1D14	0.775696	-0.366437	0.000103438
CXCL9	3.25207	1.70136	0.000103438
GNG5	1.48483	0.570297	0.000104251
GIMAP2	1.93967	0.955809	0.000104787
SGCD	0.279214	-1.84056	0.000105527
FHL3	1.45774	0.543736	0.000105527
LIPC	2.78161	1.47592	0.000108052
HSD3B7	1.72951	0.790359	0.000108076
MTA3	0.764776	-0.38689	0.000108343
ICAM3	1.52283	0.606755	0.000109641
IL15RA	1.84895	0.886709	0.000109641
CD274	2.49394	1.31843	0.000110429
SUSD5	0.288037	-1.79567	0.00011044
GBP6	2.43047	1.28123	0.000112573
H2BFXP	0.485334	-1.04295	0.000113565
LOC284798	0.55609	-0.84661	0.000113565
FAM107B	0.599	-0.739373	0.000113565
LRP12	0.655013	-0.610404	0.000113565
FOXD4	0.531305	-0.912388	0.000114343
RHOC	1.55182	0.633957	0.000115898
FBXO10	0.657833	-0.604207	0.000116433
TRIM38	1.70651	0.771049	0.00011838
FBXL2	0.312777	-1.67679	0.000118398
CXXC4	0.366799	-1.44694	0.000119335
CALN1	0.324305	-1.62458	0.000120228
HIPK2	0.54683	-0.870835	0.000120228
TMEM63C	0.427364	-1.22646	0.000120228
HCG26	2.46247	1.30011	0.000122611
LOC400940	0.31747	-1.65531	0.000128787
AKT3	0.598904	-0.739604	0.000130361
ACVR2A	0.724722	-0.464501	0.00013142
CASP4	1.79535	0.844265	0.000131614
RGPD6	0.723039	-0.467856	0.00013422
ADAMTS17	0.360935	-1.47019	0.000135217
DLG3	0.636735	-0.651236	0.000138459
RAPGEFL1	0.544301	-0.877522	0.000138821
C2orf85	0.265373	-1.91391	0.000138821
TNFRSF12A	2.19126	1.13176	0.000140292
SPRY3	0.680767	-0.554767	0.000142833
FNDC5	0.462244	-1.11327	0.000145645
PTGS1	2.10802	1.07589	0.000145892
SMPD3	0.386116	-1.37289	0.000146357
KIAA1244	0.39292	-1.34769	0.000147988
FBXO6	1.78105	0.83273	0.000150648
GPR179	0.338286	-1.56368	0.000150648
ZSCAN2	0.751591	-0.41198	0.000150648
C6orf153	1.2786	0.354562	0.000151368
PIPOX	2.61524	1.38695	0.000151368
SLC25A27	0.377056	-1.40715	0.000155651
SRGAP3	0.579122	-0.78806	0.000156182
NUDT22	1.42297	0.508908	0.000156182
PDE11A	0.407565	-1.2949	0.000159382
UBD	3.03165	1.6001	0.000163658
RAB9B	0.555983	-0.846886	0.000163658
MIAT	0.340667	-1.55357	0.000163658
LRRTM1	0.358193	-1.48119	0.000163658
MOBKL2C	1.40829	0.493944	0.000163663
TMEFF1	0.555824	-0.847301	0.000165493
BRWD1	0.756201	-0.403159	0.000165493
KIF21B	0.373885	-1.41933	0.00016637
MTSS1	0.578288	-0.790139	0.000173943
UBQLN2	0.789578	-0.340847	0.000173999
C9orf4	0.355103	-1.49369	0.000174519
TNFSF13B	2.0563	1.04005	0.000174929
CCDC85A	0.407503	-1.29512	0.000176905
EPHB1	0.325654	-1.61859	0.000180085
NEDD4L	0.606137	-0.722284	0.000180901
LOC338799	0.529757	-0.916596	0.000185422
MCF2	0.292693	-1.77254	0.000185478
WDR82	0.771184	-0.374853	0.000186172
TMEM57	0.785967	-0.347459	0.000187229
TMEM196	0.240628	-2.05513	0.000192841
USP46	0.708269	-0.49763	0.000194765
C11orf95	0.611258	-0.710148	0.000194871
GBP2	2.11262	1.07903	0.00019842
APOL2	1.63821	0.712116	0.000203901
EBF3	0.204396	-2.29056	0.000204619
TBC1D9	0.605732	-0.723249	0.000204619
PTBP2	0.661185	-0.596873	0.000204619
LSM11	0.721556	-0.470816	0.000206032
CACNA2D1	0.247289	-2.01573	0.00020606
LOC80154	0.570483	-0.809743	0.000206414
CXCL16	1.67169	0.74131	0.000206414
ADAMTSL1	0.294865	-1.76187	0.000206675
TAPBPL	1.70109	0.76646	0.000207611
DNAJB7	0.563489	-0.827541	0.000210941
GABRQ	0.293959	-1.76631	0.000210941
TTLL2	0.48962	-1.03026	0.000211564
C6orf62	1.33362	0.415351	0.000213223
IRX2	0.193491	-2.36966	0.000213807
SGIP1	0.546002	-0.873022	0.000218813
RRP8	1.35716	0.440588	0.000219654
RAB11FIP4	0.414731	-1.26975	0.000219654
DDHD2	0.764893	-0.38667	0.000219654
DLX5	0.1987	-2.33134	0.000220051
NCRNA00087	0.528983	-0.918707	0.000223464
PBRM1	0.692236	-0.530664	0.000224339
PKP4	0.607148	-0.719879	0.000227316
VAMP5	2.11776	1.08254	0.000228246
[truncated: 3,891 more rows]

## Sheet: HNSC
id	fc	log2fc	padj
[truncated: 9,633 more rows]

[truncated: 23 more sheets: KICH, KIRC, KIRP, LAML, LGG, LIHC, LUAD, LUSC, MESO, OV, PAAD, PCPG, PRAD, READ, SARC, SKCM, STAD, TGCT, THCA, THYM …]
